# Supplementary material for: Breeding Has Increased the Diversity of Cultivated Tomato in The Netherlands
Source: Front Plant Sci. 2019 Dec 20;10:1606. doi: 10.3389/fpls.2019.01606 (PMC6932954; doi:10.3389/fpls.2019.01606)
Supplement: Data Sheet S1 — The SolCap array SNP-scores of the 90 tomato varieties. [file DataSheet_1.xlsx]

## Sheet: original SolCap scores
marker	A01	B01	C01	D01	E01	F01	G01	H01	A02	B02	C02	D02	E02	F02	G02	H02	A03	B03	C03	C12	D03	E03	F03	G03	H03	A04	B04	C04	D04	E04	F04	G04	H04	A05	B05	C05	D05	E05	F05	G05	H05	A06	B06	C06	D06	E06	F06	A07	B07
	Robar	Renova	Premier	Extase	Pygmee	Nunhem´s Tuckqueen	No.59	Allround	Superieur	Roda	6289 Rode	Osiris	Titan	Rovic	Moneydor	Moneymar	Bleke Raak	V 121	Roda Compacta	Moneymaker	Sonato	Sonatine	Mecano VF	Ventura FR	Diego	Shirley	Splendid	Coronation	Dombito	Amfora	Abunda	Robin svfs	Flaneur	Novita	Sierra	Darus	Bornia	Camona	Start	Matador	Ramy	Isola	Multiset	Cherry Wonder	Tomosa	Recento	Majorca	Enchantment	Trajan
Year of market introduction in The Netherlands	1950	1950	1950	1950	1956	1957	1960	1960	1961	1962	1963	1964	1964	1965	1966	1966	1968	1970	1971	1972	1974	1974	1975	1975	1978	1979	1979	1979	1979	1981	1981	1981	1981	1982	1982	1983	1983	1985	1987	1987	1987	1988	1988	1989	1991	1991	1991	1992	1992
solcap_snp_sl_15058	A	A	A	R	A	A	A	A	A	A	A	A	G	A	A	A	R	A	A	A	R	R	A	A	A	R	A	G	A	R	G	A	R	G	A	A	R	A	R	R	A	A	G	R	R	A	A	R	A
solcap_snp_sl_60635	C	C	C	C	C	C	C	C	C	C	C	C	C	C	C	C	C	C	C	C	C	Y	C	C	C	Y	C	C	C	C	T	C	Y	Y	C	C	C	C	Y	Y	C	C	Y	Y	Y	C	C	C	C
solcap_snp_sl_60604	C	C	C	C	C	C	C	C	C	C	C	C	C	C	C	C	C	C	C	C	C	M	C	C	C	M	C	C	C	C	A	C	M	M	C	C	C	C	M	M	C	C	M	M	M	M	C	C	C
solcap_snp_sl_15056	T	T	T	T	T	T	T	T	T	T	T	T	T	T	T	T	T	T	T	T	T	T	T	T	T	T	T	T	T	T	T	T	T	T	T	T	K	T	T	T	T	T	K	T	T	T	K	K	T
solcap_snp_sl_15055	C	C	C	C	C	C	C	C	C	C	C	C	C	C	C	C	C	C	C	C	C	C	C	C	C	C	C	C	C	C	C	C	C	C	C	C	Y	C	C	C	C	C	Y	C	C	C	Y	Y	C
solcap_snp_sl_15054	C	C	C	C	C	C	C	C	C	C	C	C	C	C	C	C	C	C	C	C	C	Y	C	C	C	Y	C	C	C	C	T	C	Y	Y	C	C	Y	C	Y	Y	C	C	T	Y	Y	Y	Y	Y	C
solcap_snp_sl_15052	C	C	C	C	C	C	C	C	C	C	C	C	C	C	C	C	C	C	C	C	C	M	C	C	C	M	C	C	C	C	A	C	M	M	C	C	M	C	M	M	C	C	A	M	M	M	M	M	C
solcap_snp_sl_15051	T	T	T	Y	T	T	T	T	T	T	T	T	C	T	T	T	Y	T	T	T	Y	Y	T	T	T	Y	T	C	T	Y	C	T	Y	Y	T	T	Y	T	Y	Y	T	T	C	Y	Y	Y	Y	Y	T
solcap_snp_sl_15050	T	T	T	Y	T	T	T	T	T	T	T	T	C	T	T	T	Y	T	T	T	Y	Y	T	T	T	Y	T	C	T	Y	C	T	Y	Y	T	T	Y	T	Y	Y	T	T	C	Y	Y	Y	Y	Y	T
solcap_snp_sl_15049	A	A	A	R	A	A	A	A	A	A	A	A	G	A	A	A	R	A	A	A	R	R	A	A	A	R	A	G	A	R	G	A	R	R	A	A	R	A	R	R	A	A	G	R	R	R	R	R	A
CL004303-0524	A	A	A	R	A	A	A	A	A	A	A	A	G	A	A	A	R	A	A	A	R	R	A	A	A	R	A	G	A	R	G	A	R	R	A	A	A	A	R	R	A	A	R	R	R	R	A	A	A
solcap_snp_sl_24809	C	C	C	Y	T	T	T	T	Y	failed	T	C	C	C	failed	C	Y	failed	failed	T	Y	Y	C	C	Y	Y	Y	C	T	C	C	Y	Y	C	failed	Y	Y	Y	C	Y	Y	C	Y	Y	Y	Y	Y	Y	C
CL016197-0363_solcap_snp_sl_60559	A	A	A	R	A	A	A	A	A	A	A	A	G	A	A	A	R	A	A	A	R	R	A	A	A	R	A	G	A	R	G	A	R	R	A	A	A	A	R	R	A	A	R	R	R	R	A	A	A
solcap_snp_sl_60557	G	G	G	R	G	G	G	G	G	G	G	G	A	G	G	G	R	G	G	G	R	R	G	G	G	R	G	A	G	R	A	G	R	R	G	G	G	G	R	R	G	G	R	R	R	R	G	G	G
solcap_snp_sl_15046	C	C	C	T	T	T	T	T	T	T	T	C	T	C	T	C	T	T	T	T	T	T	C	C	Y	T	T	T	T	Y	T	Y	T	Y	T	Y	Y	Y	Y	T	Y	C	Y	T	T	T	C	C	C
solcap_snp_sl_15039	A	A	A	G	G	G	G	G	G	G	G	A	G	A	G	A	G	G	G	G	G	G	A	A	R	G	G	G	G	R	G	R	R	G	G	R	R	R	R	G	R	A	R	G	G	G	A	A	A
solcap_snp_sl_33745	G	G	G	G	G	G	G	G	G	G	G	G	G	G	G	G	G	G	G	G	G	G	T	T	K	G	G	G	K	K	G	T	G	G	G	K	K	K	K	K	T	T	K	K	G	K	T	T	T
solcap_snp_sl_60513	T	T	T	T	T	T	T	T	T	T	T	T	failed	T	T	T	T	T	T	T	T	T	T	T	T	T	T	T	Y	T	T	Y	T	T	T	T	Y	T	T	Y	Y	Y	T	Y	T	Y	T	Y	Y
solcap_snp_sl_24801	C	C	C	C	C	C	C	C	C	C	C	C	C	C	C	C	C	C	C	C	C	C	C	C	C	C	C	C	Y	C	C	Y	C	C	C	C	Y	C	C	Y	Y	Y	C	Y	C	Y	C	Y	Y
solcap_snp_sl_24799	G	G	G	K	G	G	G	G	G	G	G	G	T	G	G	G	K	G	G	G	K	K	G	G	G	K	G	K	K	K	T	K	G	K	G	G	K	G	K	T	K	K	K	T	K	T	G	K	K
solcap_snp_sl_24797	G	G	G	G	G	G	G	G	G	G	G	G	G	G	G	G	G	G	G	G	G	G	G	G	G	G	G	G	R	G	G	R	G	G	G	G	R	G	G	R	R	R	G	R	G	R	G	R	R
CL017102-0111	G	G	G	A	A	A	A	A	A	A	A	G	A	A	A	G	A	A	A	A	A	A	A	A	A	A	A	A	A	A	A	A	R	R	A	A	A	A	A	A	A	A	A	A	A	A	A	A	A
solcap_snp_sl_33737	G	G	G	R	G	G	G	G	G	G	G	G	A	G	G	G	R	G	A	G	R	R	A	A	R	R	G	R	R	A	A	A	G	R	G	R	R	R	A	A	A	A	A	A	R	A	A	A	A
solcap_snp_sl_33736	C	C	C	C	C	T	C	C	C	C	C	C	C	C	C	C	C	T	C	C	C	C	C	C	C	C	C	C	C	C	C	C	C	C	C	C	C	C	C	C	C	C	C	C	C	C	C	C	C
solcap_snp_sl_60446	C	C	C	Y	C	C	C	C	C	C	C	C	T	C	C	C	Y	C	C	C	Y	Y	C	C	C	Y	C	Y	C	Y	T	C	C	Y	C	C	C	C	Y	Y	C	C	Y	Y	Y	Y	C	C	C
solcap_snp_sl_60432	C	C	C	C	C	C	C	C	C	C	C	C	C	C	C	C	C	C	C	C	C	C	C	C	C	C	C	C	C	C	C	C	C	C	C	C	C	C	C	C	C	C	C	C	C	C	C	C	C
solcap_snp_sl_24794	C	C	C	C	C	C	C	C	C	C	C	C	C	C	C	C	C	C	C	C	C	C	C	C	C	C	C	C	Y	C	C	Y	C	C	C	C	Y	C	failed	Y	Y	Y	C	C	C	Y	C	Y	Y
solcap_snp_sl_60417	C	C	C	Y	C	C	C	C	C	C	C	C	T	C	C	C	Y	C	C	C	Y	Y	C	C	C	Y	C	Y	C	Y	T	C	C	T	C	C	C	C	Y	Y	C	C	Y	T	Y	Y	C	C	C
solcap_snp_sl_20500	A	A	A	A	A	A	A	A	A	A	A	A	A	A	A	A	A	A	A	A	A	A	A	A	A	A	A	A	A	A	A	A	A	A	A	A	A	A	A	A	A	W	A	A	A	A	A	A	W
solcap_snp_sl_20499	T	T	T	T	T	T	T	T	T	T	T	T	T	T	T	T	T	T	T	T	T	T	T	T	T	W	T	T	W	T	T	W	T	T	T	T	W	T	T	W	T	W	T	T	T	W	T	W	W
solcap_snp_sl_60393	A	A	A	A	A	A	A	A	A	A	A	A	A	A	A	A	A	A	A	A	A	A	A	A	A	A	A	A	A	A	failed	A	A	A	A	A	A	A	A	A	A	A	A	C	A	A	A	A	A
solcap_snp_sl_60360	T	T	T	T	T	T	T	T	T	T	T	T	A	T	T	T	W	T	T	T	T	T	T	T	T	T	T	T	T	T	T	T	T	T	T	T	T	T	T	T	T	T	T	W	T	T	T	T	T
solcap_snp_sl_60356	C	C	C	C	C	C	C	C	C	C	C	C	failed	C	C	C	C	C	C	C	C	C	C	C	C	C	C	C	C	C	C	C	C	C	C	C	C	C	C	C	C	C	C	Y	C	C	C	C	C
solcap_snp_sl_8704	C	C	C	Y	C	T	C	C	C	C	C	C	T	C	C	C	Y	T	C	C	Y	C	C	T	C	C	C	Y	C	Y	C	Y	C	C	Y	C	C	Y	T	C	T	Y	Y	Y	C	C	T	Y	Y
solcap_snp_sl_33719	T	T	T	Y	T	C	T	T	T	T	T	T	T	T	T	T	T	C	T	T	Y	T	T	T	T	T	T	Y	T	T	T	T	T	T	T	T	T	T	T	T	T	T	T	T	T	T	T	T	T
solcap_snp_sl_60330	C	C	C	C	C	C	C	C	C	C	C	C	C	C	C	C	C	C	C	C	C	C	C	C	C	C	C	C	C	C	C	C	C	C	C	C	C	C	C	C	C	C	C	Y	C	C	C	C	C
solcap_snp_sl_60318	C	C	C	C	C	C	C	C	C	C	C	C	A	C	C	C	M	C	C	C	C	C	C	C	C	C	C	C	C	C	C	C	C	C	C	C	C	C	C	C	C	C	C	M	C	C	C	C	C
solcap_snp_sl_8697	A	A	A	A	A	A	A	A	A	A	A	A	A	A	A	A	A	A	A	A	A	A	A	A	A	A	A	A	A	W	A	W	A	A	W	A	A	W	W	A	T	W	A	A	A	A	T	W	W
solcap_snp_sl_33709	A	A	A	R	A	G	A	A	A	A	A	A	G	A	A	A	R	G	A	A	R	A	A	G	A	A	A	R	A	A	A	A	A	A	A	A	A	A	R	A	A	A	A	A	A	R	A	A	A
solcap_snp_sl_60303	C	C	C	C	C	C	C	C	C	C	C	C	T	C	C	C	Y	C	C	C	C	C	C	C	C	C	C	C	C	C	C	C	C	C	C	C	C	C	C	C	C	C	C	Y	C	C	C	C	C
solcap_snp_sl_60296	T	T	T	T	T	T	T	T	T	T	T	T	C	T	T	T	Y	T	T	T	T	T	T	T	T	T	T	T	T	T	T	T	T	T	T	T	T	T	T	T	T	T	T	Y	T	T	T	T	T
solcap_snp_sl_60276	A	A	A	A	A	A	A	A	A	A	A	A	failed	A	A	A	A	A	A	A	A	A	A	A	A	A	A	A	A	A	A	A	A	A	A	A	A	A	A	A	A	A	A	R	A	A	A	A	A
solcap_snp_sl_33701	T	T	T	T	T	T	T	T	T	T	T	T	T	T	T	T	T	T	Y	T	T	T	T	C	T	T	T	T	Y	T	T	Y	T	T	T	T	Y	T	Y	Y	T	Y	Y	T	T	T	T	T	Y
solcap_snp_sl_60250	A	A	A	A	A	A	A	A	A	A	A	A	A	A	A	A	A	A	A	A	A	A	A	A	A	A	A	A	A	A	A	A	A	A	A	A	A	A	A	A	A	A	A	M	A	A	A	A	A
solcap_snp_sl_24789	G	G	G	G	G	G	G	G	G	G	G	G	G	G	G	G	G	G	G	G	G	G	G	A	G	G	G	G	G	G	G	G	G	G	G	G	G	G	R	G	G	G	G	G	G	G	G	G	G
solcap_snp_sl_69221	failed	failed	failed	failed	failed	failed	failed	failed	failed	failed	failed	failed	failed	failed	failed	failed	failed	failed	failed	failed	failed	failed	failed	failed	failed	failed	failed	failed	failed	failed	failed	failed	failed	failed	failed	failed	failed	failed	failed	failed	failed	failed	failed	failed	failed	failed	failed	failed	failed
solcap_snp_sl_60227	C	C	C	C	C	C	C	C	C	C	C	C	T	C	C	C	Y	C	C	C	C	C	C	C	C	C	C	C	C	C	C	C	C	C	C	C	C	C	C	C	C	C	C	Y	C	C	C	C	C
solcap_snp_sl_8669	A	A	A	A	A	G	A	A	A	A	A	A	G	A	A	A	R	G	R	A	A	A	A	G	R	R	A	A	R	G	A	G	A	A	R	R	R	R	G	R	G	G	R	R	A	G	G	R	G
solcap_snp_sl_8668	T	T	T	T	T	C	T	T	T	T	T	T	C	T	T	T	Y	C	Y	T	T	T	T	C	Y	Y	T	T	Y	C	T	C	T	T	Y	Y	Y	Y	C	Y	C	C	Y	Y	T	C	C	Y	C
solcap_snp_sl_8667	T	T	T	T	T	C	T	T	T	T	T	T	C	T	T	T	Y	C	Y	T	T	T	T	C	Y	Y	T	T	Y	C	T	C	T	T	Y	Y	Y	Y	C	Y	C	C	Y	Y	T	C	C	Y	C
solcap_snp_sl_24787	A	A	A	A	A	T	A	A	A	A	A	A	T	A	A	A	W	T	W	A	A	A	A	T	W	W	A	A	W	T	A	T	A	A	W	W	W	W	T	W	T	T	W	W	A	T	T	W	T
solcap_snp_sl_60160	G	G	G	G	G	G	G	G	G	G	G	G	G	G	G	G	G	G	G	G	G	G	G	G	G	G	G	G	G	G	G	G	G	G	G	G	G	G	G	G	G	G	G	G	G	G	G	G	G
SL20259_223	C	C	C	C	C	C	C	C	C	C	C	C	C	C	C	C	C	C	Y	C	C	C	C	T	Y	C	C	C	Y	Y	C	T	C	C	Y	Y	Y	Y	T	Y	T	T	Y	C	C	Y	T	Y	T
CL009286-0792	T	T	T	T	T	T	T	T	T	T	T	T	T	T	T	T	T	T	W	T	T	T	T	A	W	T	T	T	W	W	T	A	T	T	W	W	W	W	A	W	A	A	W	W	T	W	A	W	A
solcap_snp_sl_24785	T	T	T	T	T	T	T	T	T	T	T	T	T	T	T	T	T	T	Y	T	T	T	T	C	Y	T	T	T	Y	Y	T	C	T	T	Y	Y	Y	Y	C	Y	C	C	Y	T	T	Y	C	Y	C
solcap_snp_sl_8659	G	G	G	G	G	G	G	G	G	G	G	G	G	G	G	G	G	G	S	G	G	G	G	C	S	G	G	G	S	S	G	C	G	G	S	S	S	S	C	S	C	C	S	S	G	S	C	S	C
solcap_snp_sl_8658	A	A	A	A	A	A	A	A	A	A	A	A	failed	A	A	A	A	A	R	A	A	A	A	G	R	A	A	A	R	R	A	G	A	A	R	R	R	R	G	R	G	G	R	R	A	R	G	R	G
solcap_snp_sl_8657	A	A	A	A	A	A	A	A	A	A	A	A	A	A	A	A	A	A	R	A	A	A	A	G	R	A	A	A	R	R	A	G	A	A	R	R	R	R	G	R	G	G	R	R	A	R	G	R	G
solcap_snp_sl_8656	C	C	C	C	C	C	C	C	C	C	C	C	T	C	C	C	Y	C	Y	C	C	C	C	T	Y	C	C	C	Y	Y	C	T	C	C	Y	Y	Y	Y	T	Y	T	T	Y	Y	C	Y	T	Y	T
solcap_snp_sl_8655	A	A	A	A	A	A	A	A	A	A	A	A	G	A	A	A	R	A	R	A	A	A	A	G	R	A	A	A	R	R	A	G	A	A	R	R	R	R	G	R	G	G	R	R	A	R	G	R	G
solcap_snp_sl_8654	T	T	T	T	T	T	T	T	T	T	T	T	T	T	T	T	T	T	K	T	T	T	T	G	K	T	T	T	K	K	T	G	T	T	K	K	K	K	G	K	G	G	K	T	T	K	G	K	G
solcap_snp_sl_8653	T	T	T	T	T	T	T	T	T	T	T	T	T	T	T	T	T	T	W	T	T	T	T	A	W	T	T	T	W	W	T	A	T	T	W	W	W	W	A	W	A	A	W	W	T	W	A	W	A
solcap_snp_sl_8651	A	A	A	A	A	A	A	A	A	A	A	A	G	A	A	A	R	A	R	A	A	A	A	G	R	A	A	A	R	R	A	G	A	A	R	R	R	R	G	R	G	G	R	A	A	R	G	R	G
SGN-U573329_snp393	G	G	G	G	G	G	G	G	G	G	G	G	T	G	G	G	K	G	G	G	G	G	G	G	G	G	G	G	G	G	G	G	G	G	G	G	G	G	G	G	G	G	G	K	G	G	G	G	G
solcap_snp_sl_60143	C	C	C	C	C	C	C	C	C	C	C	C	T	C	C	C	Y	C	C	C	C	C	C	C	C	C	C	C	C	C	C	C	C	C	C	C	C	C	C	C	C	C	C	Y	C	C	C	C	C
solcap_snp_sl_8640	A	A	A	R	A	A	A	A	A	A	A	A	G	A	A	A	R	A	R	A	R	A	A	G	R	G	A	R	R	G	A	G	A	R	R	R	R	R	G	G	G	G	R	R	A	G	G	R	G
solcap_snp_sl_60135	A	A	A	A	A	A	A	A	A	A	A	A	A	A	A	A	A	A	A	A	A	A	A	A	A	C	A	A	A	M	A	A	A	A	A	A	A	A	A	A	A	A	A	M	A	M	A	A	A
solcap_snp_sl_15014	G	G	G	R	G	G	G	G	G	G	G	G	G	G	G	G	G	G	R	G	R	G	G	A	R	G	G	R	R	R	G	A	G	R	R	R	R	R	A	A	A	A	R	G	G	R	A	R	A
solcap_snp_sl_8639	T	T	T	K	T	T	T	T	T	T	T	T	G	T	T	T	K	T	K	T	K	T	T	G	K	G	T	K	K	G	T	G	T	K	K	K	K	K	G	G	G	G	K	K	T	G	G	K	G
solcap_snp_sl_15013	C	C	C	C	C	C	C	C	C	C	C	C	C	C	C	C	C	C	C	C	C	C	C	C	C	C	C	C	C	C	C	C	C	C	C	C	C	C	C	C	C	M	C	C	C	C	C	C	M
solcap_snp_sl_60113	A	A	A	A	A	A	A	A	A	A	A	A	A	A	A	A	A	A	A	A	A	A	A	A	A	A	A	A	A	A	A	A	A	A	A	A	A	A	A	A	A	A	A	R	A	A	A	A	A
solcap_snp_sl_60089	A	A	A	A	A	A	A	A	A	A	A	A	G	A	A	A	R	A	A	A	A	A	A	A	A	R	A	A	A	A	A	A	A	A	A	A	A	A	A	A	A	A	A	R	A	A	A	A	A
solcap_snp_sl_60078	A	A	A	A	A	A	A	A	A	A	A	A	T	A	A	A	W	A	A	A	A	A	T	W	A	A	A	A	A	A	A	A	A	A	A	A	A	A	W	A	A	W	A	A	A	A	A	A	W
solcap_snp_sl_33686	A	A	A	G	G	A	A	G	G	G	G	A	G	G	G	A	R	A	G	G	G	G	G	G	G	R	G	G	R	G	G	G	R	G	G	G	G	G	G	G	G	G	G	G	G	G	G	G	G
solcap_snp_sl_60043	C	C	C	C	C	C	C	C	C	C	C	C	T	C	C	C	Y	C	C	C	C	C	C	C	C	C	C	C	C	C	C	C	C	C	C	C	C	C	C	C	C	C	C	Y	C	C	C	C	C
solcap_snp_sl_33683	G	G	G	G	G	G	G	G	G	G	G	G	G	G	G	G	G	G	G	G	G	G	G	G	G	G	G	G	G	G	G	G	G	G	G	G	G	G	G	G	G	G	G	G	G	G	G	G	G
solcap_snp_sl_60029	T	T	T	T	T	T	T	T	T	T	T	T	T	T	T	T	T	T	T	T	T	T	T	T	T	T	T	T	T	T	T	T	T	T	T	T	T	T	T	T	T	T	T	T	T	T	T	T	T
solcap_snp_sl_60008	A	A	A	A	A	A	A	A	A	A	A	A	G	A	A	A	R	A	A	A	A	A	A	A	A	A	A	A	A	A	A	A	A	A	A	A	A	A	A	A	A	A	A	R	A	A	A	A	A
solcap_snp_sl_59975	G	G	G	G	G	G	G	G	G	G	G	G	A	G	G	G	R	G	G	G	G	G	G	G	G	G	G	G	G	G	G	G	G	G	G	G	G	G	G	G	G	G	G	R	G	G	G	G	G
solcap_snp_sl_59964	C	C	C	C	C	C	C	C	C	C	C	C	C	C	C	C	C	C	C	C	C	C	C	C	C	C	C	C	C	C	C	C	C	C	C	C	C	C	C	C	C	C	C	Y	C	C	C	C	C
solcap_snp_sl_20440	G	G	G	G	G	G	G	G	G	G	G	G	G	G	G	G	G	G	G	G	G	G	A	G	G	G	G	G	G	G	G	G	G	G	G	G	G	G	G	G	G	G	G	G	G	R	G	G	G
solcap_snp_sl_59944	T	T	T	T	T	T	T	T	T	T	T	T	T	T	T	T	T	T	T	T	T	T	T	T	T	T	T	T	T	T	T	T	T	T	T	T	T	T	T	T	T	T	T	C	T	T	T	T	T
solcap_snp_sl_59923	G	G	G	G	G	G	G	G	G	G	G	G	G	G	G	G	G	G	G	G	G	G	G	G	G	G	G	G	G	G	G	G	G	G	G	G	G	G	G	G	G	G	G	G	G	G	G	G	G
solcap_snp_sl_20438	T	T	T	Y	T	T	T	T	T	T	T	T	T	T	T	T	T	T	T	T	Y	T	T	T	T	Y	Y	Y	Y	Y	T	T	T	Y	T	T	T	T	Y	T	T	T	T	C	T	Y	T	T	T
solcap_snp_sl_59913	C	C	C	C	C	C	C	C	C	C	C	C	C	C	C	C	C	C	C	C	C	C	C	C	C	C	C	C	C	C	C	C	C	C	C	C	C	C	C	C	C	C	C	T	C	C	C	C	C
solcap_snp_sl_59897	A	A	A	A	A	A	A	A	A	A	A	A	A	A	A	A	A	A	A	A	A	A	A	A	A	A	A	A	A	A	A	A	A	A	A	A	A	A	A	A	A	A	A	G	A	A	A	A	A
solcap_snp_sl_59890	G	G	G	G	G	G	G	G	G	G	G	G	G	G	G	G	G	G	G	G	G	G	G	G	G	G	G	G	G	G	G	G	G	G	G	G	G	G	G	G	G	G	G	A	G	G	G	G	G
CL015771-0679	T	T	T	T	T	T	T	T	T	T	T	T	T	T	T	T	T	T	T	T	T	T	T	T	T	T	T	T	T	T	T	T	T	T	T	T	T	T	T	T	T	T	T	T	T	T	T	T	T
solcap_snp_sl_59885	C	C	C	C	C	C	C	C	C	C	C	C	C	C	C	C	C	C	C	C	C	C	C	C	C	C	C	C	C	C	C	C	C	C	C	C	C	C	C	C	C	C	C	A	C	C	C	C	C
solcap_snp_sl_33677	G	G	G	G	G	G	G	G	G	G	G	G	G	G	G	G	G	G	G	G	G	G	G	G	G	G	G	G	G	G	G	K	G	G	G	G	G	G	G	G	G	G	G	G	G	G	G	G	G
solcap_snp_sl_33676	G	G	G	S	G	G	G	G	G	G	G	G	G	G	G	G	G	G	G	G	S	G	C	C	G	C	S	S	C	C	G	S	G	S	S	G	S	S	C	S	S	C	S	G	G	C	C	C	C
solcap_snp_sl_59869	A	A	A	A	A	A	A	A	A	A	A	A	A	A	A	A	A	A	A	A	A	A	A	A	A	A	A	A	A	A	A	A	A	A	A	A	A	A	A	A	A	A	A	A	A	A	A	A	A
solcap_snp_sl_59817	T	T	T	T	T	T	T	T	T	T	T	T	T	T	T	T	T	T	T	T	T	T	T	T	T	T	T	T	T	T	T	T	T	T	T	T	T	T	T	T	T	T	T	T	T	T	T	T	T
solcap_snp_sl_59806	A	A	A	A	A	A	A	A	A	A	A	A	A	A	A	A	A	A	A	A	A	A	A	A	A	A	A	A	A	A	A	A	A	A	A	A	A	A	A	A	A	A	A	A	A	A	A	A	A
solcap_snp_sl_20426	G	G	G	G	G	G	G	G	G	G	G	G	G	G	G	G	G	G	G	G	G	G	A	A	G	G	G	G	A	R	G	R	G	G	R	G	G	R	R	G	G	A	G	G	R	R	A	A	A
solcap_snp_sl_59801	C	C	C	C	C	C	C	C	C	C	C	C	C	C	C	C	C	C	C	C	C	C	C	C	C	C	C	C	C	C	C	C	C	C	C	C	C	C	C	C	C	C	C	C	C	C	C	C	C
solcap_snp_sl_59784	T	T	T	T	T	T	T	T	T	T	T	T	T	T	T	T	T	T	T	T	T	T	T	T	T	T	T	T	T	T	T	T	T	T	T	T	T	T	T	T	T	T	T	T	T	T	T	T	T
solcap_snp_sl_59778	G	G	G	G	G	G	G	G	G	G	G	G	G	G	G	G	G	G	G	G	G	G	G	G	G	G	G	G	G	G	G	G	G	G	G	G	G	G	G	G	G	G	G	G	G	G	G	G	G
solcap_snp_sl_59771	T	T	T	T	T	T	T	T	T	T	T	T	T	T	T	T	T	T	T	T	T	T	T	C	Y	T	T	T	T	Y	T	Y	T	T	Y	Y	T	Y	Y	T	C	C	T	T	T	Y	Y	T	C
solcap_snp_sl_59768	A	A	A	A	A	A	A	A	A	A	A	A	A	A	A	A	A	A	A	A	A	A	A	A	A	A	A	A	A	A	A	A	A	A	A	A	A	A	A	A	A	A	A	A	A	A	A	A	A
solcap_snp_sl_59756	C	C	C	C	C	C	C	C	C	C	C	C	C	C	C	C	C	C	C	C	C	C	C	C	C	C	C	C	C	C	C	C	C	C	C	C	C	C	C	C	C	C	C	C	C	C	C	C	C
solcap_snp_sl_59754	A	A	A	A	A	A	A	A	A	A	A	A	A	A	A	A	A	A	A	A	A	A	A	A	A	A	A	A	A	A	A	A	A	A	A	A	A	A	A	A	A	A	A	A	A	A	A	A	A
solcap_snp_sl_20420	G	G	G	G	G	G	G	G	G	G	G	G	G	G	G	G	G	G	G	G	R	G	A	A	R	G	G	R	A	R	G	A	G	G	R	R	G	R	R	G	A	A	G	G	R	A	A	A	A
solcap_snp_sl_59748	G	G	G	G	G	G	G	G	G	G	G	G	G	G	G	G	G	G	G	G	G	G	G	G	G	G	G	G	G	G	G	G	G	G	G	G	G	G	G	G	G	G	G	G	G	G	G	G	G
solcap_snp_sl_59745	G	G	G	G	G	G	G	G	G	G	G	G	G	G	G	G	G	G	G	G	G	G	G	G	G	G	G	G	G	G	G	G	G	G	G	G	G	G	G	G	G	G	G	G	G	G	G	G	G
solcap_snp_sl_33669	A	A	A	A	A	A	A	A	A	A	A	A	A	A	A	A	A	A	A	A	A	A	A	A	A	A	A	A	A	A	A	A	A	A	A	A	A	A	A	A	A	A	A	A	A	A	A	A	A
solcap_snp_sl_41307	T	T	T	T	T	T	T	T	T	T	T	T	T	T	T	T	T	T	T	T	T	T	T	T	T	T	T	T	T	T	T	T	T	T	T	T	T	T	T	T	T	T	T	T	T	T	T	T	T
solcap_snp_sl_41302	T	T	T	T	T	T	T	T	T	T	T	T	T	T	T	T	T	T	T	T	T	T	T	T	T	T	T	T	T	T	T	T	T	T	T	T	T	T	T	T	T	T	T	T	T	T	T	T	T
solcap_snp_sl_27082	C	C	C	C	C	C	C	C	C	C	C	C	C	C	C	C	C	C	C	C	C	C	C	C	C	C	C	C	C	C	C	C	C	C	C	C	C	C	C	C	C	C	C	C	C	C	C	C	C
solcap_snp_sl_41286	A	A	A	A	A	A	A	A	A	A	A	A	A	A	A	A	A	A	A	A	A	A	A	A	A	A	A	A	A	A	A	A	A	A	A	A	A	A	A	A	A	A	A	A	A	A	A	A	A
solcap_snp_sl_16925	T	T	T	T	T	T	T	T	T	T	T	T	T	T	T	T	T	T	T	T	K	T	G	G	K	T	T	K	G	K	T	G	T	T	K	K	T	K	K	T	G	G	T	T	K	G	G	G	G
solcap_snp_sl_41282	C	C	C	C	C	C	C	C	C	C	C	C	C	C	C	C	C	C	C	C	C	C	C	C	C	C	C	C	C	C	C	C	C	C	C	C	C	C	C	C	C	C	C	C	C	C	C	C	C
solcap_snp_sl_51462	C	C	C	C	C	C	C	C	C	C	C	C	C	C	C	C	C	C	C	C	C	C	C	C	C	C	C	C	C	C	C	C	C	C	C	C	C	C	C	C	C	C	C	C	C	C	C	C	C
solcap_snp_sl_51466	A	A	A	A	A	A	A	A	A	A	A	A	A	A	A	A	A	A	A	A	A	A	A	A	A	A	A	A	A	A	A	A	A	A	A	A	A	A	A	A	A	A	A	A	A	A	A	A	A
solcap_snp_sl_51469	C	C	C	C	C	C	C	C	C	C	C	C	C	C	C	C	C	C	C	C	C	C	C	C	C	C	C	C	C	C	C	C	C	C	C	C	C	C	C	C	C	C	C	C	C	C	C	C	C
solcap_snp_sl_30350	G	G	G	G	G	G	G	G	G	G	G	G	G	G	G	G	G	G	G	G	G	G	G	G	G	G	G	G	G	G	G	G	G	G	G	G	G	G	G	G	G	G	G	G	G	G	G	G	G
solcap_snp_sl_51474	A	A	A	A	A	A	A	A	A	A	A	A	A	A	A	A	A	A	A	A	A	A	A	A	A	A	A	A	A	A	A	A	A	A	A	A	A	A	A	A	A	A	A	A	A	A	A	A	A
solcap_snp_sl_66077	A	A	A	A	A	A	A	A	A	A	A	A	A	A	A	A	A	A	A	A	A	A	A	A	A	A	A	A	A	A	A	A	A	A	A	A	A	A	A	A	A	A	A	A	A	A	A	A	A
solcap_snp_sl_51990	T	T	T	T	T	T	T	T	T	T	T	T	T	T	T	T	T	T	T	T	T	T	T	T	T	T	T	T	T	T	T	T	T	T	T	T	T	T	T	T	T	T	T	T	T	T	T	T	T
solcap_snp_sl_51992	C	C	C	C	C	C	C	C	C	C	C	C	C	C	C	C	C	C	C	C	C	C	C	C	C	C	C	C	C	C	C	C	C	C	C	C	C	C	C	C	C	C	C	C	C	C	C	C	C
solcap_snp_sl_56061	A	A	A	A	A	failed	A	A	A	A	A	A	A	A	A	A	A	A	A	A	A	A	A	A	A	A	A	A	A	A	A	A	failed	A	A	A	A	A	A	A	A	A	A	A	A	A	A	A	A
solcap_snp_sl_25971	T	T	T	T	T	T	T	T	T	T	T	T	T	T	T	T	T	T	T	T	T	T	T	T	Y	T	T	T	T	T	T	T	T	T	T	T	T	Y	T	T	T	T	T	T	T	T	T	T	T
solcap_snp_sl_16394	G	G	G	G	G	G	G	G	G	G	G	G	G	G	G	G	G	G	G	G	G	G	G	G	G	G	G	G	G	G	G	G	G	G	G	G	G	G	G	G	G	G	G	G	G	G	G	G	G
solcap_snp_sl_52623	G	G	G	G	G	G	G	G	G	G	G	G	G	G	G	G	G	G	G	G	G	G	G	G	G	G	G	G	G	G	G	G	G	G	G	G	G	G	G	G	G	G	G	G	G	G	G	G	G
solcap_snp_sl_19066	C	C	C	C	C	C	C	C	C	C	C	C	C	C	C	C	C	C	C	C	Y	C	T	T	Y	C	C	Y	T	Y	C	T	C	C	Y	Y	C	Y	Y	C	T	T	C	C	Y	T	T	T	T
solcap_snp_sl_52631	A	A	A	A	A	A	A	A	A	A	A	A	A	A	A	A	A	A	A	A	A	A	A	A	A	A	A	A	A	A	A	A	A	A	A	A	A	A	A	A	A	A	A	A	A	A	A	A	A
solcap_snp_sl_14042	T	T	T	T	T	T	T	T	T	T	T	T	T	T	T	T	T	T	T	T	T	T	C	T	T	T	T	T	C	T	T	Y	T	T	T	T	T	T	T	T	T	T	T	T	Y	Y	Y	C	T
solcap_snp_sl_19068	T	T	T	T	T	T	T	T	T	T	T	T	T	T	T	T	T	T	T	T	Y	T	C	C	Y	T	T	Y	C	Y	T	C	T	T	Y	Y	T	Y	Y	T	C	C	T	T	Y	C	C	C	C
solcap_snp_sl_52641	C	C	C	C	C	C	C	C	C	C	C	C	C	C	C	C	C	C	C	C	C	C	C	C	C	C	C	C	C	C	C	C	C	C	C	C	C	C	C	C	C	C	C	C	C	C	C	C	C
solcap_snp_sl_52646	C	C	C	C	C	C	C	C	C	C	C	C	C	C	C	C	C	C	C	C	C	C	C	C	C	C	C	C	C	C	C	C	C	C	C	C	C	C	C	C	C	C	C	C	C	C	C	C	C
solcap_snp_sl_41433	G	G	G	G	G	G	G	G	G	G	G	G	G	G	G	G	G	G	G	G	G	G	G	G	G	G	G	G	G	G	G	G	G	G	G	G	G	G	G	G	G	G	G	G	G	G	G	G	G
solcap_snp_sl_41434	G	G	G	G	G	G	G	G	G	G	G	G	G	G	G	G	G	G	G	G	G	G	G	G	G	G	G	G	G	G	G	G	G	G	G	G	G	G	G	G	G	G	G	G	G	G	G	G	G
solcap_snp_sl_41438	G	G	G	G	G	G	G	G	G	G	G	G	G	G	G	G	G	G	G	G	G	G	G	G	G	G	G	G	G	G	G	G	G	G	G	G	G	G	G	G	G	G	G	G	G	G	G	G	G
CL009029-0054	C	C	C	C	C	C	C	C	C	C	C	C	C	C	C	C	C	C	C	C	C	C	C	C	C	C	C	C	C	C	C	C	C	C	C	C	C	C	C	C	C	C	C	C	C	C	C	C	C
SL10106_923	A	A	A	A	A	A	A	A	A	A	A	A	A	A	A	A	A	A	A	A	A	A	A	A	A	A	A	A	A	A	A	A	A	A	A	A	A	A	A	A	A	A	A	A	A	A	A	A	A
solcap_snp_sl_41445	C	C	C	C	C	C	C	C	C	C	C	C	C	C	C	C	C	C	C	C	C	C	C	C	C	C	C	C	C	C	C	C	C	C	C	C	C	C	C	C	C	C	C	C	C	C	C	C	C
solcap_snp_sl_39021	G	G	G	G	G	G	G	G	G	G	G	G	G	G	G	G	G	G	G	G	G	G	G	G	G	G	G	G	G	G	G	G	G	G	G	G	G	G	G	G	G	G	G	G	G	G	G	G	G
hp2_exon2_11_b	G	G	G	G	G	G	G	G	G	G	G	G	G	G	G	G	G	G	G	G	G	G	G	G	G	G	G	G	G	G	G	G	G	G	G	G	G	G	G	G	G	G	G	G	G	G	G	G	G
solcap_snp_sl_16520	A	A	A	A	A	A	A	A	A	A	A	A	A	A	A	A	A	A	A	A	R	A	G	G	R	A	A	R	G	R	A	G	A	A	R	R	A	R	R	A	G	G	A	A	R	G	G	G	G
solcap_snp_sl_16519	G	G	G	G	G	G	G	G	G	G	G	G	G	G	G	G	G	G	G	G	R	G	A	A	R	G	G	R	A	R	G	A	G	G	R	R	G	R	R	G	A	A	G	G	R	A	A	A	A
solcap_snp_sl_39018	G	G	G	G	G	G	G	G	G	G	G	G	G	G	G	G	G	G	G	G	G	G	G	G	G	G	G	G	G	G	G	G	G	G	G	G	G	G	G	G	G	G	G	G	G	G	G	G	G
solcap_snp_sl_70304	G	G	G	G	G	G	G	G	G	G	G	G	G	G	G	G	G	G	G	G	G	G	G	G	G	G	G	G	G	G	G	G	G	G	G	G	G	G	G	G	G	G	G	G	G	G	G	G	G
solcap_snp_sl_70307	T	T	T	T	T	T	T	T	T	T	T	T	T	T	T	T	T	T	T	T	T	T	T	T	T	T	T	T	T	T	T	T	T	T	T	T	T	T	T	T	T	T	T	T	T	T	T	T	T
solcap_snp_sl_70309	A	A	A	A	A	A	A	A	A	A	A	A	A	A	A	A	A	A	A	A	A	A	A	A	A	A	A	A	A	A	A	A	A	A	A	A	A	A	A	A	A	A	A	A	A	A	A	A	A
solcap_snp_sl_70310	A	A	A	A	A	A	A	A	A	A	A	A	A	A	A	A	A	A	A	A	A	A	A	A	A	A	A	A	A	A	A	A	A	A	A	A	A	A	A	A	A	A	A	A	A	A	A	A	A
solcap_snp_sl_70311	T	T	T	T	T	T	T	T	T	T	T	T	T	T	T	T	T	T	T	T	T	T	T	T	T	T	T	T	T	T	T	T	T	T	T	T	T	T	T	T	T	T	T	T	T	T	T	T	T
solcap_snp_sl_38942	T	T	T	T	T	T	T	T	T	T	T	T	T	T	T	T	T	T	T	T	T	T	T	T	T	T	T	T	T	T	T	T	T	T	T	T	T	T	T	T	T	T	T	T	T	T	T	T	T
solcap_snp_sl_70312	C	C	C	C	C	C	C	C	C	C	C	C	C	C	C	C	C	C	C	C	C	C	C	C	C	C	C	C	C	C	C	C	C	C	C	C	C	C	C	C	C	C	C	C	C	C	C	C	C
solcap_snp_sl_70320	T	T	T	T	T	T	T	T	T	T	T	T	T	T	T	T	T	T	T	T	T	T	T	T	T	T	T	T	T	T	T	T	T	T	T	T	T	T	T	T	T	T	T	T	T	T	T	T	T
solcap_snp_sl_22423	C	C	C	C	C	C	C	C	C	C	C	C	C	C	C	C	C	C	C	C	S	C	G	G	S	C	C	S	G	S	C	G	C	C	S	S	C	S	S	C	G	G	C	C	S	G	G	G	G
solcap_snp_sl_70323	C	C	C	C	C	C	C	C	C	C	C	C	C	C	C	C	C	C	C	C	C	C	C	C	C	C	C	C	C	C	C	C	C	C	C	C	C	C	C	C	C	C	C	C	C	C	C	C	C
solcap_snp_sl_70327	G	G	G	G	G	G	G	G	G	G	G	G	G	G	G	G	G	G	G	G	G	G	G	G	G	G	G	G	G	G	G	G	G	G	G	G	G	G	G	G	G	G	G	G	G	G	G	G	G
solcap_snp_sl_70330	A	A	A	A	A	A	A	A	A	A	A	A	A	A	A	A	A	A	A	A	A	A	A	A	A	A	A	A	A	A	A	A	A	A	A	A	A	A	A	A	A	A	A	A	A	A	A	A	A
solcap_snp_sl_70332	G	G	G	G	G	G	G	G	G	G	G	G	G	G	G	G	G	G	G	G	G	G	G	G	G	G	G	G	G	G	G	G	G	G	G	G	G	G	G	G	G	G	G	G	G	G	G	G	G
solcap_snp_sl_70336	T	T	T	T	T	T	T	T	T	T	T	T	T	T	T	T	T	T	T	T	T	T	T	T	T	T	T	T	T	T	T	T	T	T	T	T	T	T	T	T	T	T	T	T	T	T	T	T	T
solcap_snp_sl_70337	T	T	T	T	T	T	T	T	T	T	T	T	T	T	T	T	T	T	T	T	T	T	T	T	T	T	T	T	T	T	T	T	T	T	T	T	T	T	T	T	T	T	T	T	T	T	T	T	T
solcap_snp_sl_70344	A	A	A	A	A	A	A	A	A	A	A	A	A	A	A	A	A	A	A	A	A	A	A	A	A	A	A	A	A	A	A	A	A	A	A	A	A	A	A	A	A	A	A	A	A	A	A	A	A
solcap_snp_sl_70345	A	A	A	A	A	A	A	A	A	A	A	A	A	A	A	A	A	A	A	A	A	A	A	A	A	A	A	A	A	A	A	A	A	A	A	A	A	A	A	A	A	A	A	A	A	A	A	A	A
solcap_snp_sl_70347	T	T	T	T	T	T	T	T	T	T	T	T	T	T	T	T	T	T	T	T	K	T	T	G	T	T	T	K	T	K	T	T	T	T	K	T	T	K	K	T	K	G	T	T	T	K	K	T	G
solcap_snp_sl_70348	T	T	T	T	T	T	T	T	T	T	T	T	T	T	T	T	T	T	T	T	T	T	T	T	T	T	T	T	T	T	T	T	T	T	T	T	T	T	T	T	T	T	T	T	T	T	T	T	T
solcap_snp_sl_70358	T	T	T	T	T	T	T	T	T	T	T	T	T	T	T	T	T	T	T	T	T	T	T	T	T	T	T	T	T	T	T	T	T	T	T	T	T	T	T	T	T	T	T	T	T	T	T	T	T
solcap_snp_sl_37014	T	T	T	T	T	T	T	T	T	T	T	T	T	T	T	T	T	T	T	T	T	T	T	T	T	T	T	T	T	T	T	T	T	T	T	T	T	T	T	T	T	T	T	T	T	T	T	T	T
solcap_snp_sl_70365	G	G	G	G	G	G	G	G	G	G	G	G	G	G	G	G	G	G	G	G	G	G	G	G	G	G	G	G	G	G	G	G	G	G	G	G	G	G	G	G	G	G	G	G	G	G	G	G	G
solcap_snp_sl_70368	A	A	A	A	A	A	A	A	A	A	A	A	A	A	A	A	A	A	A	A	A	A	A	A	A	A	A	A	A	A	A	A	A	A	A	A	A	A	A	A	A	A	A	A	A	A	A	A	A
solcap_snp_sl_70371	G	G	G	G	G	G	G	G	G	G	G	G	G	G	G	G	G	G	G	G	G	G	G	G	G	G	G	G	G	G	G	G	G	G	G	G	G	G	G	G	G	G	G	G	G	G	G	G	G
solcap_snp_sl_70374	T	T	T	T	T	T	T	T	T	T	T	T	T	T	T	T	T	T	T	T	T	T	T	T	T	T	T	T	T	T	T	T	T	T	T	T	T	T	T	T	T	T	T	T	T	T	T	T	T
solcap_snp_sl_38790	C	C	C	C	C	C	C	C	C	C	C	C	C	C	C	C	C	C	C	C	C	C	C	C	C	C	C	C	C	C	C	C	C	C	C	C	C	C	C	C	C	C	C	C	C	C	C	C	C
solcap_snp_sl_38789	C	C	C	C	C	C	C	C	C	C	C	C	C	C	C	C	C	C	C	C	C	C	C	C	C	C	C	C	C	C	C	C	C	C	C	C	C	C	C	C	C	C	C	C	C	C	C	C	C
solcap_snp_sl_16466	A	A	A	A	A	A	A	A	A	A	A	A	A	A	A	A	A	A	A	A	R	A	G	G	R	A	A	R	G	R	A	G	A	A	R	R	A	R	R	A	G	G	A	A	R	G	G	G	G
solcap_snp_sl_38787	A	A	A	A	A	A	A	A	A	A	A	A	A	A	A	A	A	A	A	A	A	A	A	A	A	A	A	A	A	A	A	A	A	A	A	A	A	A	A	A	A	A	A	A	A	A	A	A	A
solcap_snp_sl_38782	G	G	G	G	G	G	G	G	G	G	G	G	G	G	G	G	G	G	G	G	G	G	G	G	G	G	G	G	G	G	G	G	G	G	G	G	G	G	G	G	G	G	G	G	G	G	G	G	G
solcap_snp_sl_26417	C	C	C	C	C	C	C	C	C	C	C	C	C	C	C	C	C	C	C	C	Y	C	T	T	Y	C	C	Y	T	Y	C	T	C	C	Y	Y	C	Y	Y	C	T	T	C	C	Y	T	T	T	T
solcap_snp_sl_38773	G	G	G	G	G	G	G	G	G	G	G	G	G	G	G	G	G	G	G	G	G	G	G	G	G	G	G	G	G	G	G	G	G	G	G	G	G	G	G	G	G	G	G	G	G	G	G	G	G
solcap_snp_sl_38771	G	G	G	G	G	G	G	G	G	G	G	G	G	G	G	G	G	G	G	G	G	G	G	G	G	G	G	G	G	G	G	G	G	G	G	G	G	G	G	G	G	G	G	G	G	G	G	G	G
solcap_snp_sl_38764	failed	failed	failed	failed	failed	failed	failed	failed	failed	failed	failed	failed	failed	failed	failed	failed	failed	failed	failed	failed	failed	failed	failed	failed	failed	failed	failed	failed	failed	failed	failed	failed	failed	failed	failed	failed	failed	failed	failed	failed	failed	failed	failed	failed	failed	failed	failed	failed	failed
solcap_snp_sl_18641	T	T	T	T	T	T	T	T	T	T	T	T	T	T	T	T	T	T	T	T	Y	T	T	C	T	T	T	Y	T	Y	T	T	T	T	Y	T	T	Y	Y	T	Y	C	T	T	T	Y	Y	T	C
CL015959-0346	A	A	A	A	A	A	A	A	A	A	A	A	A	A	A	A	A	A	A	A	A	A	A	A	A	A	A	A	A	A	A	A	A	A	A	A	A	A	A	A	A	A	A	A	A	A	A	A	A
solcap_snp_sl_18635	T	T	T	T	T	T	T	T	T	T	T	T	T	T	T	T	T	T	T	T	Y	T	C	C	Y	T	T	Y	C	Y	T	C	T	T	Y	Y	T	Y	Y	T	C	C	T	T	T	C	C	Y	C
solcap_snp_sl_18634	T	T	T	T	T	T	T	T	T	T	T	T	T	T	T	T	T	T	T	T	W	T	A	A	W	T	T	W	A	W	T	A	T	T	W	W	W	W	W	T	A	A	T	T	W	A	A	W	A
solcap_snp_sl_50596	C	C	C	C	C	C	C	C	C	C	C	C	C	C	C	C	C	C	C	C	C	C	C	C	C	C	C	C	C	C	C	C	C	C	C	C	C	C	C	C	C	C	C	C	C	C	C	C	C
solcap_snp_sl_50589	T	T	T	T	T	T	T	T	T	T	T	T	T	T	T	T	T	T	T	T	T	T	T	T	T	T	T	T	T	T	T	T	T	T	T	T	T	T	T	T	T	T	T	T	T	T	T	T	T
solcap_snp_sl_18627	T	T	T	T	T	T	T	T	T	T	T	T	T	T	T	T	T	T	T	T	K	T	G	G	K	T	T	K	G	K	T	G	T	T	K	K	K	K	K	T	G	G	T	T	K	G	G	K	G
solcap_snp_sl_50576	A	A	A	A	A	A	A	A	A	A	A	A	A	A	A	A	A	A	A	A	A	A	A	A	A	A	A	A	A	A	A	A	A	A	A	A	A	A	A	A	A	A	A	A	A	A	A	A	A
solcap_snp_sl_30142	C	C	C	C	C	C	C	C	C	C	C	C	C	C	C	C	C	C	C	C	C	C	C	C	C	C	C	C	C	C	C	C	C	C	C	C	C	C	C	C	C	C	C	C	C	C	C	C	C
solcap_snp_sl_50571	G	G	G	G	G	G	G	G	G	G	G	G	G	G	G	G	G	G	G	G	G	G	G	G	G	G	G	G	G	G	G	G	G	G	G	G	G	G	G	G	G	G	G	G	G	G	G	G	G
solcap_snp_sl_13762	A	A	A	A	A	A	A	A	A	A	A	A	A	A	A	A	A	A	A	A	M	A	A	C	A	A	A	M	A	M	A	A	A	A	M	A	M	M	failed	A	M	M	M	A	M	C	M	A	M
solcap_snp_sl_50561	C	C	C	C	C	C	C	C	C	C	C	C	C	C	C	C	C	C	C	C	C	C	C	C	C	C	C	C	C	C	C	C	C	C	C	C	C	C	C	C	C	C	C	C	C	C	C	C	C
solcap_snp_sl_18619	G	G	G	G	G	G	G	G	G	G	G	G	G	G	G	G	G	G	G	G	G	G	T	G	G	G	G	G	T	G	G	K	G	G	G	G	G	G	G	G	G	K	G	G	G	K	K	K	K
solcap_snp_sl_50542	C	C	C	C	C	C	C	C	C	C	C	C	C	C	C	C	C	C	C	C	C	C	C	C	C	C	C	C	C	C	C	C	C	C	C	C	C	C	C	C	C	C	C	C	C	C	C	C	C
solcap_snp_sl_50534	T	T	T	T	T	T	T	T	T	T	T	T	T	T	T	T	T	T	T	T	T	T	T	T	T	T	T	T	T	T	T	T	T	T	T	T	T	T	T	T	T	T	T	T	T	T	T	T	T
solcap_snp_sl_30135	G	G	G	R	A	G	G	A	A	G	G	G	G	G	A	G	G	G	R	A	A	A	A	A	A	R	R	R	A	R	A	A	R	G	A	R	R	R	R	R	A	A	A	R	A	A	A	R	A
CL016155-0185	T	T	T	T	T	T	T	T	T	T	T	T	T	T	T	T	T	T	T	T	T	T	T	T	T	T	T	T	T	T	T	T	T	T	T	T	T	T	T	T	T	T	T	T	T	T	T	T	T
solcap_snp_sl_30133	C	C	C	C	C	C	C	C	C	C	C	C	C	C	C	C	C	C	C	C	C	C	C	C	C	C	C	C	C	C	C	C	C	C	C	C	C	C	C	C	C	C	C	C	C	C	C	C	C
solcap_snp_sl_50504	C	C	C	C	C	C	C	C	C	C	C	C	C	C	C	C	C	C	C	C	C	C	C	C	C	C	C	C	C	C	C	C	C	C	C	C	C	C	C	C	C	C	C	C	C	C	C	C	C
solcap_snp_sl_50495	A	A	A	A	A	A	A	A	A	A	A	A	A	A	A	A	A	A	A	A	A	A	A	A	A	A	A	A	A	A	A	A	A	A	A	A	A	A	A	A	A	A	A	A	A	A	A	A	A
CL015442-1034	C	C	C	C	C	C	C	C	C	C	C	C	C	C	C	C	C	C	C	C	C	C	C	C	C	C	C	C	C	C	C	C	C	C	C	C	C	C	C	C	C	C	C	C	C	C	C	C	C
solcap_snp_sl_50477	T	T	T	T	T	T	T	T	T	T	T	T	T	T	T	T	T	T	T	T	T	T	T	T	T	T	T	T	T	T	T	T	T	T	T	T	T	T	T	T	T	T	T	T	T	T	T	T	T
solcap_snp_sl_50470	A	A	A	A	A	A	A	A	A	A	A	A	A	A	A	A	A	A	A	A	A	A	A	A	A	A	A	A	A	A	A	A	A	A	A	A	A	A	A	A	A	A	A	A	A	A	A	A	A
solcap_snp_sl_50467	T	T	T	T	T	T	T	T	T	T	T	T	T	T	T	T	T	T	T	T	T	T	T	T	T	T	T	T	T	T	T	T	T	T	T	T	T	T	T	T	T	T	T	Y	T	T	T	T	T
solcap_snp_sl_50464	T	T	T	T	T	T	T	T	T	T	T	T	T	T	T	T	T	T	T	T	T	T	T	T	T	T	T	T	T	T	T	T	T	T	T	T	T	T	T	T	T	T	T	Y	T	T	T	T	T
solcap_snp_sl_30125	C	C	C	C	C	C	C	C	C	C	C	C	C	C	C	C	C	C	C	C	C	C	C	C	C	C	C	C	C	C	C	C	C	C	C	C	C	C	C	C	C	C	C	C	C	C	C	C	C
solcap_snp_sl_50458	A	A	A	A	A	A	A	A	A	A	A	A	A	A	A	A	A	A	A	A	A	A	A	A	A	A	A	A	A	A	A	A	A	A	A	A	A	A	A	A	A	A	A	R	A	A	A	A	A
solcap_snp_sl_30116	T	T	T	T	T	T	T	T	T	T	T	T	T	T	T	T	T	T	T	T	Y	T	T	T	T	T	Y	Y	T	T	T	T	T	T	T	T	T	T	T	T	T	Y	T	T	Y	Y	T	T	T
solcap_snp_sl_4963	T	T	T	T	T	T	T	T	T	T	T	T	T	T	T	T	T	T	T	T	T	T	T	T	T	T	T	T	T	T	T	T	T	T	T	T	T	T	T	T	T	T	T	T	T	Y	T	T	T
solcap_snp_sl_50427	G	G	G	G	G	G	G	G	G	G	G	G	G	G	G	G	G	G	G	G	G	G	G	G	G	G	G	G	G	G	G	G	G	G	G	G	G	G	G	G	G	G	G	R	G	G	G	G	G
solcap_snp_sl_30114	C	C	C	C	C	C	C	C	C	C	C	C	C	C	C	C	C	C	C	C	Y	C	C	C	C	C	Y	Y	C	C	C	C	C	C	C	C	C	C	C	C	C	Y	C	C	Y	C	C	C	C
solcap_snp_sl_30111	T	T	T	T	T	T	T	T	T	T	T	T	T	T	T	T	T	T	T	T	T	T	T	T	T	T	T	T	T	T	T	T	T	T	T	T	T	T	T	T	T	T	T	T	T	T	T	T	T
SL20127_1427	G	G	G	G	G	G	G	G	G	G	G	G	G	G	G	G	G	G	G	G	G	G	G	G	G	G	G	G	G	G	G	G	G	G	G	G	G	G	G	G	G	G	G	G	G	G	G	G	G
solcap_snp_sl_50373	T	T	T	T	T	T	T	T	T	T	T	T	T	T	T	T	T	T	T	T	T	T	T	T	T	T	T	T	T	T	T	T	T	T	T	T	T	T	T	T	T	T	T	T	T	T	T	T	T
2325_3_327_b_2325_3_314	G	G	G	G	G	G	G	G	G	G	G	G	G	G	G	G	G	G	G	G	G	G	G	G	G	G	G	G	G	G	G	G	G	G	G	G	G	G	G	G	G	G	G	G	G	G	G	G	G
2325_3_363_b_2325_3_350_solcap_snp_sl_70013	C	C	C	C	C	C	C	C	C	C	C	C	C	C	C	C	C	C	C	C	C	C	C	C	C	C	C	C	C	C	C	C	C	C	C	C	C	C	C	C	C	C	C	C	C	C	C	C	C
solcap_snp_sl_36902	C	C	C	C	C	C	C	C	C	C	C	C	C	C	C	C	C	C	C	C	C	C	C	C	C	C	C	C	C	C	C	C	C	C	C	C	C	C	C	C	C	C	C	C	C	C	C	C	C
solcap_snp_sl_70031	C	C	C	C	C	C	C	C	C	C	C	C	C	C	C	C	C	C	C	C	C	C	C	C	C	C	C	C	C	C	C	C	C	C	C	C	C	C	C	C	C	C	C	C	C	C	C	C	C
Le005879_466	A	A	A	A	A	A	A	A	A	A	A	A	A	A	A	A	A	A	A	A	A	A	A	A	A	A	A	A	A	A	A	A	A	A	A	A	A	A	A	A	A	A	A	A	A	A	A	A	A
SL10483_141	A	A	A	A	A	A	A	A	A	A	A	A	A	A	A	A	A	A	A	A	A	A	A	A	A	A	A	A	A	A	A	A	A	A	A	A	A	A	A	A	A	A	A	A	A	A	A	A	A
solcap_snp_sl_36963	T	T	T	T	T	T	T	T	T	T	T	T	T	T	T	T	T	T	T	T	T	T	T	T	T	T	T	T	T	T	T	T	T	T	T	T	T	T	T	T	T	T	T	T	T	T	T	K	T
solcap_snp_sl_37999	C	C	C	C	C	C	C	C	C	C	C	C	C	C	C	C	C	C	C	C	C	C	C	C	C	C	C	C	C	C	C	C	C	C	C	C	C	C	C	C	C	C	C	C	C	C	C	C	C
solcap_snp_sl_25912	A	A	A	A	A	A	A	A	A	A	A	A	A	A	A	A	A	A	A	A	A	A	A	A	A	A	A	A	A	A	A	A	A	A	A	A	A	A	A	A	A	A	A	A	A	A	A	A	A
solcap_snp_sl_25914	C	C	C	C	C	C	C	C	C	C	C	C	C	C	C	C	C	C	C	C	C	C	C	C	C	C	C	C	C	C	C	C	C	C	C	C	C	C	C	C	C	C	C	C	C	C	C	C	C
solcap_snp_sl_22691	A	A	A	A	A	A	A	A	A	A	A	A	A	A	A	A	A	A	A	A	A	A	A	A	A	A	A	A	A	A	A	A	A	A	A	A	A	A	A	A	A	A	A	A	A	A	A	A	A
solcap_snp_sl_25918	C	C	C	C	C	C	C	C	C	C	C	C	C	C	C	C	C	C	C	C	C	C	C	C	C	C	C	C	C	C	C	C	C	C	C	C	C	C	C	C	C	C	C	C	C	C	C	C	C
solcap_snp_sl_38059	A	A	A	A	A	A	A	A	A	A	A	A	A	A	A	A	A	A	A	A	A	A	A	A	A	A	A	A	A	A	A	A	A	A	A	A	A	A	A	A	A	A	A	A	A	A	A	A	A
solcap_snp_sl_38078	C	C	C	C	C	C	C	C	C	C	C	C	C	C	C	C	C	C	C	C	C	C	C	C	C	C	C	C	C	C	C	C	C	C	C	C	C	C	C	C	C	C	C	T	C	C	C	C	C
solcap_snp_sl_456	C	C	C	C	C	C	C	C	C	C	C	C	C	C	C	C	C	C	C	C	C	C	A	C	M	C	C	C	C	M	C	C	C	C	M	M	C	M	M	C	A	C	C	A	M	C	M	M	C
solcap_snp_sl_457	A	A	A	A	A	A	A	A	A	A	A	A	A	A	A	A	A	A	A	A	A	A	G	A	R	A	A	A	A	R	A	A	A	A	R	R	A	R	R	A	R	A	A	R	R	A	R	R	A
solcap_snp_sl_38096	T	T	T	T	T	T	T	T	T	T	T	T	T	T	T	T	T	T	T	T	T	T	T	T	T	T	T	T	T	T	T	T	T	T	T	T	T	T	T	T	T	T	T	T	T	T	T	T	T
solcap_snp_sl_25922	T	T	T	T	T	T	T	T	T	T	T	T	T	T	T	T	T	T	T	T	T	T	T	T	T	T	T	T	T	T	T	T	T	T	T	T	T	T	T	T	T	T	T	T	T	T	T	T	T
solcap_snp_sl_38116	A	A	A	A	A	A	A	A	A	A	A	A	A	A	A	A	A	A	A	A	A	A	A	A	A	A	A	A	A	A	A	A	A	A	A	A	A	A	A	A	A	A	A	A	A	A	A	A	A
solcap_snp_sl_38119	G	G	G	G	G	G	G	G	G	G	G	G	G	G	G	G	G	G	G	G	G	G	G	G	G	G	G	G	G	G	G	G	G	G	G	G	G	G	G	G	G	G	G	G	G	G	G	G	G
solcap_snp_sl_38123	T	T	T	T	T	T	T	T	T	T	T	T	T	T	T	T	T	T	T	T	T	T	C	T	C	T	T	T	T	Y	T	T	T	T	Y	Y	T	C	Y	Y	Y	T	T	T	Y	T	Y	Y	T
solcap_snp_sl_38126	A	A	A	A	A	A	A	A	A	A	A	A	A	A	A	A	A	A	A	A	A	A	A	A	A	A	A	A	A	A	A	A	A	A	A	A	A	A	A	A	A	A	A	A	A	A	A	A	A
solcap_snp_sl_469	T	T	T	T	T	T	T	T	T	T	T	T	T	T	T	T	T	T	T	T	T	T	C	T	C	T	T	T	T	Y	T	T	T	T	Y	Y	T	C	Y	Y	Y	T	T	T	Y	T	Y	Y	T
solcap_snp_sl_25926	A	A	A	A	A	A	A	A	A	A	A	A	A	A	A	A	A	A	A	A	A	A	A	A	A	A	A	A	A	A	A	A	A	A	A	A	A	A	A	A	A	A	A	A	A	A	A	A	A
solcap_snp_sl_25929	T	T	T	T	T	T	T	T	T	T	T	T	T	T	T	T	T	T	T	T	T	T	T	T	T	T	T	T	T	T	T	T	Y	T	T	T	T	T	T	T	T	T	T	T	T	T	T	T	T
solcap_snp_sl_25930	G	G	G	G	G	G	G	G	G	G	G	G	G	G	G	G	G	G	G	G	G	G	G	G	G	G	G	G	G	G	G	G	R	G	G	G	G	G	G	G	G	G	G	G	G	G	G	G	G
solcap_snp_sl_25931	C	C	C	C	C	C	C	C	C	C	C	C	C	C	C	C	C	C	C	C	C	C	C	C	C	C	C	C	C	C	C	C	Y	C	C	C	C	C	C	C	C	C	C	C	C	C	C	C	C
solcap_snp_sl_25934	C	C	C	C	C	C	C	C	C	C	C	C	C	C	C	C	C	C	C	C	C	C	C	C	C	C	C	C	C	C	C	C	C	C	C	C	C	C	C	C	C	C	C	C	C	C	C	C	C
solcap_snp_sl_25935	G	G	G	G	G	G	G	G	G	G	G	G	G	G	G	G	G	G	G	G	G	G	G	G	G	G	G	G	G	G	G	G	G	G	G	G	G	G	G	G	G	G	G	G	G	G	G	G	G
solcap_snp_sl_38178	G	G	G	G	G	G	G	G	G	G	G	G	G	G	G	G	G	G	G	G	G	G	G	G	G	G	G	G	G	G	G	G	G	G	G	G	G	G	G	G	G	G	G	G	G	G	G	G	G
solcap_snp_sl_38210	A	A	A	A	A	A	A	A	A	A	A	A	A	A	A	A	A	A	A	A	A	A	A	A	A	A	A	A	A	A	A	A	A	A	A	A	A	A	A	A	A	A	A	A	A	A	A	A	A
solcap_snp_sl_38243	G	G	G	G	G	G	G	G	G	G	G	G	G	G	G	G	G	G	G	G	G	G	G	G	G	G	G	G	G	G	G	G	G	G	G	G	G	G	G	G	G	G	G	G	G	G	G	G	G
solcap_snp_sl_38290	C	C	C	C	C	C	C	C	C	C	C	C	C	C	C	C	C	C	C	C	C	C	C	C	C	C	C	C	C	C	C	C	C	C	C	C	C	C	C	C	C	C	C	C	C	C	C	C	C
solcap_snp_sl_12348	C	T	T	C	T	C	T	C	C	C	C	C	C	C	C	C	Y	C	C	C	Y	Y	T	T	T	C	T	Y	C	Y	C	Y	T	Y	T	Y	C	T	Y	Y	Y	T	Y	C	Y	C	T	T	T
solcap_snp_sl_12350	T	A	A	T	A	T	A	T	T	T	T	T	T	T	T	T	W	T	T	T	W	W	A	A	A	T	A	W	T	W	T	W	A	W	A	W	T	A	W	W	W	A	W	T	W	T	A	A	A
solcap_snp_sl_12351	T	C	C	T	C	T	C	T	T	T	T	T	T	T	T	T	Y	T	T	T	Y	Y	C	C	C	T	C	Y	T	Y	T	Y	C	Y	C	Y	T	C	Y	Y	Y	C	Y	T	Y	T	C	C	C
solcap_snp_sl_12352	T	C	C	T	C	T	C	T	T	T	T	T	T	T	T	T	Y	T	T	T	Y	Y	C	C	C	T	C	Y	T	Y	T	Y	C	Y	C	Y	T	C	Y	Y	Y	C	Y	T	Y	T	C	C	C
solcap_snp_sl_25951	G	G	G	G	G	G	G	G	G	G	G	G	G	G	G	G	G	G	G	G	G	G	G	G	G	G	G	G	G	G	G	G	G	G	G	G	G	G	G	G	G	G	G	G	G	G	G	G	G
solcap_snp_sl_25952	G	G	G	G	G	G	G	G	G	G	G	G	G	G	G	G	G	G	G	G	G	G	G	G	G	G	G	G	G	G	G	G	G	G	G	G	G	G	G	G	G	G	G	G	G	G	G	G	G
solcap_snp_sl_12354	C	A	A	C	A	C	A	C	C	C	C	C	C	C	C	C	M	C	C	C	M	M	A	A	A	C	A	M	C	M	C	M	A	M	A	M	C	A	M	M	M	A	M	C	M	C	A	A	A
solcap_snp_sl_12355	G	A	A	G	A	G	A	G	G	G	G	G	G	G	G	G	R	G	G	G	R	R	A	A	A	G	A	R	G	R	G	R	A	R	A	R	G	A	R	R	R	A	R	G	R	G	A	A	A
solcap_snp_sl_12356	G	A	A	G	A	G	A	G	G	G	G	G	G	G	G	G	R	G	G	G	R	R	A	A	A	G	A	R	G	R	G	R	A	R	A	R	G	A	R	R	R	A	R	G	R	G	A	A	A
solcap_snp_sl_12358	C	T	T	C	T	C	T	C	C	C	C	C	C	C	C	C	Y	C	C	C	Y	Y	T	T	T	C	T	Y	C	Y	C	Y	T	Y	T	Y	C	T	Y	Y	Y	T	Y	C	Y	C	T	T	T
solcap_snp_sl_25953	A	G	G	A	G	A	G	A	A	A	A	A	A	A	A	A	R	A	A	A	R	R	G	G	G	A	G	R	G	R	A	G	G	R	G	R	A	G	R	R	G	G	R	A	R	R	G	G	G
solcap_snp_sl_38324	C	C	C	C	C	C	C	C	C	C	C	C	C	C	C	C	C	C	C	C	C	C	C	C	C	C	C	C	C	C	C	C	C	C	C	C	C	C	C	C	C	C	C	C	C	C	C	C	C
solcap_snp_sl_521	G	G	G	G	G	G	G	G	G	G	G	G	G	G	G	G	G	G	G	G	G	G	T	G	G	G	G	G	T	G	G	T	G	G	G	G	G	G	G	G	K	G	G	G	G	K	G	K	G
solcap_snp_sl_16331	C	C	C	C	C	C	C	C	C	C	C	C	C	C	C	C	C	C	C	C	C	C	A	C	A	C	M	C	A	M	C	A	M	C	M	M	M	A	M	M	A	C	M	A	M	M	M	A	C
solcap_snp_sl_12359	A	A	A	A	A	A	A	A	A	A	A	A	A	A	A	A	A	A	A	A	A	R	G	A	G	A	R	A	G	R	A	G	G	A	R	R	R	G	R	R	G	A	R	G	R	R	R	G	A
solcap_snp_sl_38346	T	T	T	T	T	T	T	T	T	T	T	T	T	T	T	T	T	T	T	T	T	Y	T	T	T	T	T	T	T	T	T	T	Y	T	T	T	T	T	T	T	T	T	T	T	T	T	T	T	T
solcap_snp_sl_530	A	A	A	A	G	A	A	A	A	A	A	A	A	A	A	A	A	A	A	A	A	R	A	G	R	A	A	A	A	A	A	A	R	A	A	A	A	R	A	R	A	G	A	G	A	A	A	A	G
solcap_snp_sl_531	A	A	A	A	G	A	A	A	A	A	A	A	A	A	A	A	A	A	A	A	A	A	G	G	A	A	A	A	G	A	A	G	A	A	A	A	A	A	A	A	G	G	A	G	A	R	A	R	G
solcap_snp_sl_38356	T	T	T	T	T	T	T	T	T	T	T	T	T	T	T	T	T	T	T	T	T	Y	T	T	T	T	T	T	T	T	T	T	Y	T	T	T	T	T	T	T	T	T	T	T	T	T	T	T	T
solcap_snp_sl_535	G	G	G	G	C	G	G	G	G	G	G	G	G	G	G	G	G	G	G	G	G	G	C	C	G	G	G	G	C	G	G	C	G	G	G	G	G	G	G	G	C	C	G	G	G	S	G	S	C
solcap_snp_sl_25960	C	C	C	C	C	C	C	C	C	C	C	C	C	C	C	C	C	C	C	C	C	C	C	C	C	C	C	C	C	C	C	C	C	C	C	C	C	C	C	C	C	C	C	C	C	C	C	C	C
CL009288-0542	A	A	A	A	A	A	A	A	A	A	A	A	A	A	A	A	A	A	A	A	A	A	A	A	A	A	A	A	A	A	A	A	A	A	A	A	A	A	A	A	A	A	A	A	A	A	A	A	A
solcap_snp_sl_38389	T	T	T	T	T	T	T	T	T	T	T	T	T	T	T	T	T	T	T	T	T	T	T	T	T	T	T	T	T	T	T	T	T	T	T	T	T	T	T	T	T	T	T	T	T	T	T	T	T
solcap_snp_sl_38390	C	C	C	C	C	C	C	C	C	C	C	C	C	C	C	C	C	C	C	C	C	C	C	C	C	C	C	C	C	C	C	C	C	C	C	C	C	C	C	C	C	C	C	C	C	C	C	C	C
solcap_snp_sl_38406	A	A	A	A	A	A	A	A	A	A	A	A	A	A	A	A	A	A	A	A	A	A	A	A	A	A	A	A	A	A	A	A	A	A	A	A	A	A	A	A	A	A	A	A	A	A	A	A	A
solcap_snp_sl_27286	T	T	T	T	T	T	T	T	T	T	T	T	T	T	T	T	T	T	T	T	T	T	T	T	T	T	T	T	T	T	T	T	T	T	T	T	T	T	T	T	T	T	T	T	T	T	T	T	T
solcap_snp_sl_36715	C	C	C	C	C	C	C	C	C	C	C	C	C	C	C	C	C	C	C	C	C	C	C	C	C	C	C	C	C	C	C	C	C	C	C	C	C	C	C	C	C	C	C	C	C	C	C	Y	C
solcap_snp_sl_27345	G	G	G	G	G	G	G	G	G	G	G	G	G	G	G	G	G	G	G	G	G	G	G	G	G	G	G	G	G	G	G	G	G	G	G	G	G	G	G	G	G	G	G	G	G	G	G	G	G
solcap_snp_sl_42191	A	A	A	A	A	A	A	A	A	A	A	A	A	A	A	A	A	A	A	A	A	A	A	A	A	A	A	A	A	A	A	A	A	A	A	A	A	A	A	A	A	A	A	A	A	A	A	A	A
solcap_snp_sl_27382	G	G	G	G	G	G	G	G	G	G	G	G	G	G	G	G	G	G	G	G	G	G	G	G	G	G	G	G	G	G	G	G	G	G	G	G	G	G	G	G	G	G	G	G	G	G	G	G	G
solcap_snp_sl_27400	A	A	A	A	A	A	A	A	A	A	A	A	A	A	A	A	A	A	A	A	A	A	A	A	A	A	A	A	A	A	A	A	A	A	A	A	A	A	A	A	A	A	A	A	A	A	A	A	A
solcap_snp_sl_27424	C	C	C	C	C	C	C	C	C	C	C	C	C	C	C	C	C	C	C	C	C	C	C	C	C	C	C	C	C	C	C	C	C	C	C	C	C	C	C	C	C	C	C	C	C	C	C	C	C
solcap_snp_sl_27452	A	A	A	A	A	A	A	A	A	A	A	A	A	A	A	A	A	A	A	A	A	A	A	A	A	A	A	A	A	A	A	A	A	A	A	A	A	A	A	A	A	A	A	A	A	A	A	A	A
solcap_snp_sl_27482	G	G	G	G	G	G	G	G	G	G	G	G	G	G	G	G	G	G	G	G	G	G	G	G	G	G	G	G	G	G	G	G	G	G	G	G	G	G	G	G	G	G	G	G	G	G	G	G	G
solcap_snp_sl_1813	A	A	A	A	A	A	A	A	A	A	A	A	A	A	A	A	A	A	A	A	A	A	A	A	A	A	A	A	A	A	A	A	A	A	A	A	A	A	A	A	A	A	A	A	A	A	A	A	A
solcap_snp_sl_1814	A	A	A	A	A	A	A	A	A	A	A	A	A	A	A	A	A	A	A	A	A	A	A	A	A	A	A	A	A	A	A	A	A	A	A	A	A	A	A	A	A	A	A	A	A	A	A	A	A
Le010791_85_solcap_snp_sl_42212	G	G	G	G	G	G	G	G	G	G	G	G	G	G	G	G	G	G	G	G	G	G	G	G	G	G	G	G	G	G	G	G	G	G	G	G	G	G	G	G	G	G	G	G	G	G	G	G	G
solcap_snp_sl_42213	G	G	G	G	G	G	G	G	G	G	G	G	G	G	G	G	G	G	G	G	G	G	G	G	G	G	G	G	G	G	G	G	G	G	G	G	G	G	G	G	G	G	G	G	G	G	G	G	G
solcap_snp_sl_17063	C	C	C	C	C	C	C	C	C	C	C	C	C	C	C	C	C	C	C	C	C	C	T	T	T	C	C	C	T	Y	C	T	C	C	Y	Y	C	T	Y	Y	T	T	Y	T	C	Y	Y	T	T
solcap_snp_sl_1815	A	A	A	A	A	A	A	A	A	A	A	A	A	A	A	A	A	A	A	A	A	A	A	A	A	A	A	A	A	A	A	A	A	A	A	A	A	A	A	A	A	A	A	A	A	A	A	A	A
solcap_snp_sl_1817	T	T	T	T	T	T	T	T	T	T	T	T	T	T	T	T	T	T	T	T	T	T	T	T	T	T	T	T	T	T	T	T	T	T	T	T	T	T	T	T	T	T	T	T	T	T	T	T	T
solcap_snp_sl_1819	G	G	G	G	G	G	G	G	G	G	G	G	G	G	G	G	G	G	G	G	G	G	G	G	G	G	G	G	G	G	G	G	G	G	G	G	G	G	G	G	G	G	G	G	G	G	G	G	G
solcap_snp_sl_17068	A	A	A	A	A	A	A	A	A	A	A	A	A	A	A	A	A	A	A	A	A	A	T	T	T	A	A	A	T	A	A	T	A	A	A	W	A	W	A	W	T	T	W	T	A	W	A	T	T
solcap_snp_sl_17071	T	T	T	T	T	T	T	T	T	T	T	T	T	T	T	T	T	T	T	T	T	T	G	G	G	T	T	T	G	T	T	G	T	T	T	K	T	K	T	K	G	G	K	G	T	K	T	G	G
solcap_snp_sl_17072	C	C	C	C	C	C	C	C	C	C	C	C	C	C	C	C	C	C	C	C	C	C	T	T	T	C	C	C	T	C	C	T	C	C	C	Y	C	Y	C	Y	T	T	Y	T	C	Y	C	T	T
solcap_snp_sl_27505	C	C	C	C	C	C	C	C	C	C	C	C	C	C	C	C	C	C	C	C	C	C	C	C	C	C	C	C	C	C	C	C	C	C	C	C	C	C	C	C	C	C	C	C	C	C	C	C	C
solcap_snp_sl_1824	A	A	A	A	A	A	A	A	A	A	A	A	A	A	A	A	A	A	A	A	A	A	A	A	A	A	A	A	A	A	A	A	A	A	A	A	A	A	A	A	A	A	A	A	A	A	A	A	A
solcap_snp_sl_17073	G	G	G	G	G	G	G	G	G	G	G	G	G	G	G	G	G	G	G	G	G	G	R	R	R	G	G	G	R	R	G	R	G	G	R	R	G	R	R	R	R	R	R	R	G	R	G	R	R
solcap_snp_sl_17075	G	G	G	G	G	G	G	G	G	G	G	G	G	G	G	G	G	G	G	G	G	G	A	A	A	G	G	G	A	R	G	A	G	G	R	R	G	R	R	R	A	A	R	G	G	R	G	A	A
solcap_snp_sl_27531	C	C	C	C	C	C	C	C	C	C	C	C	C	C	C	C	C	C	C	C	C	C	C	C	C	C	C	C	C	C	C	C	C	C	C	C	C	C	C	C	C	C	C	C	C	C	C	C	C
solcap_snp_sl_17076	G	G	G	G	G	G	G	G	G	G	G	G	G	G	G	G	G	G	G	G	G	G	A	A	A	G	G	G	A	R	G	A	G	G	R	R	G	R	R	R	A	A	R	G	G	R	G	A	A
solcap_snp_sl_17077	A	A	A	A	A	A	A	A	A	A	A	A	A	A	A	A	A	A	A	A	A	A	G	G	G	A	A	A	G	R	A	G	A	A	R	R	A	R	R	R	G	G	R	A	A	R	A	G	G
solcap_snp_sl_17080	A	A	A	A	A	A	A	A	A	A	A	A	A	A	A	A	A	A	A	A	A	A	C	C	C	A	A	A	C	M	A	C	A	A	M	M	A	M	M	M	C	C	M	C	A	M	A	C	C
solcap_snp_sl_1827	T	T	T	T	T	T	T	T	T	T	T	T	T	T	T	T	T	T	T	T	T	T	T	T	T	T	T	T	T	T	T	T	T	T	T	T	T	T	T	T	T	T	T	T	T	T	T	T	T
solcap_snp_sl_27556	G	G	G	G	G	G	G	G	G	G	G	G	G	G	G	G	G	G	G	G	G	G	G	G	G	G	G	G	G	G	G	G	G	G	G	G	G	G	G	G	G	G	G	G	G	G	G	G	G
solcap_snp_sl_27588	T	T	T	T	T	T	T	T	T	T	T	T	T	T	T	T	T	T	T	T	T	T	T	T	T	T	T	T	T	T	T	K	T	T	T	T	T	T	T	T	T	T	T	T	T	T	T	T	T
solcap_snp_sl_27600	T	T	T	T	T	T	T	T	T	T	T	T	T	T	T	T	T	T	T	T	T	T	T	T	T	T	T	T	T	T	T	T	T	T	T	T	T	T	T	T	T	T	T	T	T	T	T	T	T
solcap_snp_sl_27605	G	G	G	G	G	G	G	G	G	G	G	G	G	G	G	G	G	G	G	G	G	G	G	G	G	G	G	G	G	G	G	G	G	G	G	G	G	G	G	G	G	G	G	G	G	G	G	G	G
solcap_snp_sl_27629	T	T	T	T	T	T	T	T	T	T	T	T	T	T	T	T	T	T	T	T	T	T	T	T	T	T	T	T	T	T	T	T	T	T	T	T	T	T	T	T	T	T	T	T	T	T	T	T	T
solcap_snp_sl_12826	T	T	T	T	T	T	T	T	T	T	T	T	T	T	T	T	T	T	T	T	T	Y	T	T	T	T	T	T	C	T	Y	C	T	T	T	T	T	T	T	T	Y	Y	Y	T	T	T	Y	T	Y
solcap_snp_sl_27636	G	G	G	G	G	G	G	G	G	G	G	G	G	G	G	G	G	G	G	G	G	G	G	G	G	G	G	G	G	G	G	G	G	G	G	G	G	G	G	G	G	G	G	G	G	G	G	G	G
SGN-U585636_snp200_solcap_snp_sl_26254	G	G	G	G	G	G	G	G	G	G	G	G	G	G	G	G	G	G	G	G	G	G	G	G	G	G	G	G	G	G	G	G	G	G	G	G	G	G	G	G	G	G	G	G	G	G	G	G	G
solcap_snp_sl_26248	C	C	C	C	C	C	C	C	C	C	C	C	C	C	C	C	C	C	C	C	C	C	C	C	C	C	C	C	C	C	C	C	C	C	C	C	C	C	C	C	C	C	C	C	C	C	C	C	C
solcap_snp_sl_38490	A	A	A	A	A	A	A	A	A	A	A	A	A	A	A	A	A	A	A	A	A	A	A	A	A	A	A	A	A	A	A	A	A	A	A	A	A	A	A	A	A	A	A	A	A	A	A	A	A
solcap_snp_sl_16393	A	A	A	A	A	A	A	A	A	A	A	A	A	A	A	A	A	A	A	A	A	A	A	A	A	A	A	A	A	A	A	A	A	A	A	A	A	A	A	A	A	A	A	A	A	A	R	A	A
solcap_snp_sl_16389	T	T	T	T	T	T	T	T	T	T	T	T	T	T	T	T	T	T	T	T	T	T	T	T	T	T	T	T	T	T	T	T	T	T	T	T	T	T	T	T	T	T	T	T	T	T	Y	T	T
SL10943_357	G	G	G	G	G	G	G	G	G	G	G	G	G	G	G	G	G	G	G	G	G	G	G	G	G	G	G	G	G	G	G	G	G	G	G	G	G	G	G	G	G	G	G	G	G	G	G	G	G
solcap_snp_sl_602	G	G	G	G	A	G	G	G	G	G	G	G	G	G	G	G	G	G	G	G	G	R	A	G	A	G	G	G	A	G	R	A	G	G	G	R	R	R	G	R	A	R	R	A	G	G	G	R	R
solcap_snp_sl_26192	A	A	A	A	A	A	A	A	A	A	A	A	A	A	A	A	A	A	A	A	A	A	A	A	A	A	A	A	A	A	A	A	A	A	A	A	A	A	A	A	A	A	A	A	A	A	A	A	A
solcap_snp_sl_26171	T	T	T	T	T	T	T	T	T	T	T	T	T	T	T	T	T	T	T	T	T	T	T	T	T	T	T	T	T	T	T	T	T	T	T	T	T	T	T	T	T	T	T	T	T	T	T	T	T
solcap_snp_sl_34452	T	T	T	T	T	T	T	T	T	T	T	T	T	T	T	T	T	T	T	T	T	T	T	T	T	T	T	T	T	T	T	T	T	T	T	T	T	T	T	T	T	T	T	T	T	T	T	T	T
solcap_snp_sl_34461	G	G	G	G	G	G	G	G	G	G	G	G	G	G	G	G	G	G	G	G	G	G	G	G	G	G	G	G	G	G	G	G	G	G	G	G	G	G	G	G	G	G	G	G	G	G	G	G	G
solcap_snp_sl_34484	C	C	C	C	C	C	C	C	C	C	C	C	C	C	C	C	C	C	C	C	C	C	C	C	C	C	C	C	C	C	C	C	C	C	C	C	C	C	C	C	C	C	C	C	C	C	C	C	C
solcap_snp_sl_34512	C	C	C	C	C	C	C	C	C	C	C	C	C	C	C	C	C	C	C	C	C	C	C	C	C	C	C	C	C	C	C	C	C	C	C	C	C	C	C	C	C	C	C	C	C	C	C	C	C
solcap_snp_sl_34513	A	A	A	A	A	A	A	A	A	A	A	A	A	A	A	A	A	A	A	A	A	A	A	A	A	A	A	A	A	A	A	A	A	A	A	A	A	A	A	A	A	A	A	A	A	A	A	A	A
solcap_snp_sl_34515	A	A	A	A	A	A	A	A	A	A	A	A	A	A	A	A	A	A	A	A	A	A	A	A	A	A	A	A	A	A	A	A	A	A	A	A	A	A	A	A	A	A	A	A	A	A	A	A	A
solcap_snp_sl_34522	T	T	T	T	T	T	T	T	T	T	T	T	T	T	T	T	T	T	T	T	T	T	T	T	T	T	T	T	T	T	T	T	T	T	T	T	T	T	T	T	T	T	T	T	T	T	T	T	T
CL015901-0259	T	T	T	T	T	T	T	T	T	T	T	T	T	T	T	T	T	T	T	T	T	T	T	T	T	T	T	T	T	T	T	T	T	T	T	T	T	T	T	T	T	T	T	T	T	T	T	T	T
solcap_snp_sl_63558	A	A	A	A	A	A	A	A	A	A	A	A	A	A	A	A	A	A	A	A	A	A	A	A	A	A	A	A	A	A	A	A	A	A	A	A	A	A	A	A	A	A	A	A	A	A	A	A	A
solcap_snp_sl_9751	G	G	G	G	G	G	G	G	G	G	G	G	G	G	G	G	G	G	G	G	G	R	A	G	R	G	G	G	R	G	R	R	G	G	G	R	G	G	G	G	R	G	G	G	G	R	G	G	G
solcap_snp_sl_34545	C	C	C	C	C	C	C	C	C	C	C	C	C	C	C	C	C	C	C	C	C	C	C	C	C	C	C	C	C	C	C	C	C	C	C	C	C	C	C	C	C	C	C	C	C	C	C	C	C
solcap_snp_sl_21280	G	G	G	G	G	G	G	G	G	G	G	G	G	G	G	G	G	G	G	G	G	R	A	G	R	G	G	G	R	G	R	A	G	G	G	R	R	G	G	G	A	G	G	G	G	R	R	G	G
CL016392-0070	A	A	A	A	A	A	A	A	A	A	A	A	A	A	A	A	A	A	A	A	A	A	A	A	A	A	A	A	A	A	A	A	A	A	A	A	A	A	A	A	A	A	A	A	A	A	A	A	A
solcap_snp_sl_9752	C	C	C	C	G	C	C	C	C	C	C	C	C	C	C	C	C	C	C	C	C	C	C	C	C	C	C	C	C	C	C	C	C	C	C	C	C	C	C	C	C	C	C	C	C	C	C	C	C
solcap_snp_sl_9755	A	A	A	A	A	A	A	A	A	A	A	A	A	A	A	A	A	A	A	A	A	R	G	G	G	A	A	A	R	A	R	G	A	A	A	R	R	R	A	R	G	G	R	G	A	R	R	G	G
solcap_snp_sl_9756	T	T	T	T	T	T	T	T	T	T	T	T	T	T	T	T	T	T	T	T	T	Y	C	C	C	T	T	T	Y	T	Y	C	T	T	T	Y	Y	Y	T	Y	C	C	Y	C	T	Y	Y	C	C
solcap_snp_sl_9758	G	G	G	G	G	G	G	G	G	G	G	G	G	G	G	G	G	G	G	G	G	R	A	A	A	G	G	G	R	G	R	A	G	G	G	R	G	R	G	R	A	A	R	A	G	R	G	A	A
solcap_snp_sl_34568	C	C	C	C	C	C	C	C	C	C	C	C	C	C	C	C	C	C	C	C	C	M	A	A	A	C	C	C	M	C	M	A	C	C	C	M	M	M	C	M	A	A	M	A	C	M	M	A	A
solcap_snp_sl_9759	A	A	A	A	A	A	A	A	A	A	A	A	A	A	A	A	A	A	A	A	A	R	G	G	G	A	A	A	R	A	R	G	A	A	A	R	R	R	A	R	G	G	R	G	A	R	R	G	G
Cd2_3001	G	G	G	G	G	G	G	G	G	G	G	G	G	G	G	G	G	G	G	G	G	G	G	G	G	G	G	G	G	G	G	G	G	G	G	G	G	G	G	G	G	G	G	G	G	G	G	G	G
Cd2_2755_solcap_snp_sl_34581	G	G	G	G	G	G	G	G	G	G	G	G	G	G	G	G	G	G	G	G	G	G	G	G	G	G	G	G	G	G	G	G	G	G	G	G	G	G	G	G	G	G	G	G	G	G	G	G	G
Cd2_2182_solcap_snp_sl_34582	C	C	C	C	C	C	C	C	C	C	C	C	C	C	C	C	C	C	C	C	C	C	C	C	C	C	C	C	C	C	C	C	C	C	C	C	C	C	C	C	C	C	C	C	C	C	C	C	C
solcap_snp_sl_34596	G	G	G	G	G	G	G	G	G	G	G	G	G	G	G	G	G	G	G	G	G	G	G	G	G	G	G	G	G	G	G	G	G	G	G	G	G	G	G	G	G	G	G	G	G	G	G	G	G
solcap_snp_sl_34603	G	G	G	G	A	G	G	G	G	G	G	G	G	G	G	G	G	G	G	G	G	G	G	A	R	G	G	G	G	G	G	R	G	G	G	G	R	R	G	R	R	R	R	A	G	G	R	A	A
solcap_snp_sl_63583	G	G	G	G	T	G	G	G	G	G	G	G	G	G	G	G	G	G	G	G	G	G	G	T	K	G	G	G	G	G	G	K	G	G	G	G	K	K	G	K	K	K	K	T	G	G	K	T	T
solcap_snp_sl_15339	T	T	T	T	C	T	T	T	T	T	T	T	T	T	T	T	T	T	T	T	T	T	T	C	Y	T	T	T	T	T	T	Y	T	T	T	T	Y	Y	T	Y	Y	Y	Y	C	T	T	Y	C	C
solcap_snp_sl_34622	G	G	G	G	G	G	G	G	G	G	G	G	G	G	G	G	G	G	G	G	G	G	G	G	G	G	G	G	G	G	G	G	G	G	G	G	G	G	G	G	G	G	G	G	G	G	G	G	G
solcap_snp_sl_27784	G	G	G	G	G	G	G	G	G	G	G	G	G	G	G	G	G	G	G	G	G	G	G	G	G	G	G	G	G	G	G	G	G	G	G	G	G	G	G	G	G	G	G	R	G	G	G	G	G
solcap_snp_sl_27832	C	C	C	C	C	C	C	C	C	C	C	C	C	C	C	C	C	C	C	C	C	C	C	C	C	C	C	C	C	C	C	C	C	C	C	C	C	C	C	C	C	C	C	M	C	C	C	C	C
solcap_snp_sl_27859	G	G	G	G	G	G	G	G	G	G	G	G	G	G	G	G	G	G	G	G	G	G	G	G	G	G	G	G	G	G	G	G	G	G	G	G	G	G	G	G	G	G	G	R	G	G	G	G	G
solcap_snp_sl_27863	G	G	G	G	G	G	G	G	G	G	G	G	G	G	G	G	G	G	G	G	G	G	G	G	G	G	G	G	G	G	G	G	G	G	G	G	G	G	G	G	G	G	G	S	G	G	G	G	G
solcap_snp_sl_2202	A	A	A	A	A	A	A	A	A	A	A	A	A	A	A	A	A	A	A	A	A	R	G	A	R	A	A	A	R	A	A	R	A	A	A	R	A	A	A	A	R	R	A	R	A	R	A	R	R
solcap_snp_sl_43632	G	G	G	G	G	G	G	G	G	G	G	G	G	G	G	G	G	G	G	G	G	R	A	G	R	G	G	G	R	G	G	R	G	G	G	R	G	G	G	G	R	R	G	G	G	R	G	R	failed
solcap_snp_sl_27904	C	C	C	C	C	C	C	C	C	C	C	C	C	C	C	C	C	C	C	C	C	C	C	C	C	C	C	C	C	C	C	C	C	C	C	C	C	C	C	C	C	C	C	Y	C	C	C	C	C
solcap_snp_sl_27906	G	G	G	G	G	G	G	G	G	G	G	G	G	G	G	G	G	G	G	G	G	G	G	G	G	G	G	G	G	G	G	G	G	G	G	G	G	G	G	G	G	G	G	G	G	G	G	G	G
solcap_snp_sl_27908	G	G	G	G	G	G	G	G	G	G	G	G	G	G	G	G	G	G	G	G	G	G	G	G	G	G	G	G	G	G	G	G	G	G	G	G	G	G	G	G	G	G	G	R	G	G	G	G	G
SL10945_281	C	C	C	C	C	C	C	C	C	C	C	C	C	C	C	C	C	C	C	C	C	C	C	C	C	C	C	C	C	C	C	C	C	C	C	C	C	C	C	C	C	C	C	Y	C	C	C	C	C
solcap_snp_sl_17289	G	G	G	G	G	G	G	G	G	G	G	G	G	G	G	G	G	G	G	G	G	G	G	G	G	G	G	G	G	G	G	G	G	G	G	G	G	G	G	G	G	G	G	G	G	G	G	G	G
solcap_snp_sl_27964	C	C	C	C	C	C	C	C	C	C	C	C	C	C	C	C	C	C	C	C	C	C	C	C	C	C	C	C	C	C	C	C	C	C	C	C	C	C	C	C	C	C	C	M	C	C	C	C	C
CL016133-0426	T	T	T	T	T	T	T	T	T	T	T	T	T	T	T	T	T	T	T	T	T	T	T	T	T	T	T	T	T	T	T	T	T	T	T	T	T	T	T	T	T	T	T	T	T	T	T	T	T
solcap_snp_sl_2218	G	G	G	G	G	G	G	G	G	G	G	G	G	G	G	G	G	G	G	G	G	G	G	G	R	G	G	G	G	G	G	R	G	G	G	R	R	G	G	G	A	G	R	R	G	R	G	A	R
solcap_snp_sl_2219	A	A	A	A	A	A	A	A	A	A	A	A	A	A	A	A	A	A	A	A	A	A	A	A	M	A	A	A	A	A	A	M	A	A	A	M	M	A	A	A	C	A	M	A	A	M	A	C	failed
solcap_snp_sl_43655	T	T	T	T	T	T	T	T	T	T	T	T	T	T	T	T	T	T	T	T	T	T	T	T	T	T	T	T	T	T	T	T	T	T	T	T	T	T	T	T	T	T	T	Y	T	T	T	T	T
solcap_snp_sl_2226	A	A	A	A	A	A	A	A	A	A	A	A	A	A	A	A	A	A	A	A	A	A	A	A	R	A	A	A	A	A	A	R	A	A	A	R	R	A	A	A	G	A	R	A	A	G	A	G	A
solcap_snp_sl_2234	A	A	A	A	A	A	A	A	A	A	A	A	A	A	A	A	A	A	A	A	A	A	A	G	R	A	A	A	A	A	A	R	A	A	A	R	R	A	A	A	G	A	R	R	A	G	A	G	failed
solcap_snp_sl_28023	A	A	A	A	A	A	A	A	A	A	A	A	A	A	A	A	A	A	A	A	A	A	A	A	A	A	A	A	A	A	A	A	A	A	A	A	A	A	A	A	A	A	A	R	A	A	A	A	A
solcap_snp_sl_28057	C	C	C	C	C	C	C	C	C	C	C	C	C	C	C	C	C	C	C	C	C	C	C	C	C	C	C	C	C	C	C	C	C	C	C	C	C	C	C	C	C	C	C	C	C	C	C	C	C
CL016805-0518	G	G	G	G	G	G	G	G	G	G	G	G	G	G	G	G	G	G	G	G	G	G	G	G	G	G	G	G	G	G	G	G	G	G	G	G	G	G	G	G	G	G	G	G	G	G	G	G	G
CL016805-0261	A	A	A	A	A	A	A	A	A	A	A	A	A	A	A	A	A	A	A	A	A	A	A	A	A	A	A	A	A	A	A	W	A	A	A	A	A	A	A	A	A	A	A	A	A	A	A	A	A
solcap_snp_sl_28099	G	G	G	G	G	G	G	G	G	G	G	G	G	G	G	G	G	G	G	G	G	G	G	G	G	G	G	G	G	G	G	R	G	G	G	G	G	G	G	G	G	G	G	G	G	G	G	G	G
solcap_snp_sl_28168	G	G	G	G	G	G	G	G	G	G	G	G	G	G	G	G	G	G	G	G	G	G	G	G	G	G	G	G	G	G	G	G	G	G	G	G	G	G	G	G	G	G	G	G	G	G	G	G	G
solcap_snp_sl_28173	C	C	C	C	C	C	C	C	C	C	C	C	C	C	C	C	C	C	C	C	C	C	C	C	C	C	C	C	C	C	C	C	C	C	C	C	C	C	C	C	C	C	C	C	C	C	C	C	C
SGN-U585738_snp404_solcap_snp_sl_43712	G	G	G	G	G	G	G	G	G	G	G	G	G	G	G	G	G	G	G	G	G	G	G	G	G	G	G	G	G	G	G	G	G	G	G	G	G	G	G	G	G	G	G	G	G	G	G	G	G
solcap_snp_sl_28225	T	T	T	T	T	T	T	T	T	T	T	T	T	T	T	T	T	T	T	T	T	T	T	T	T	T	T	T	T	T	T	T	T	T	T	T	T	T	T	T	T	T	T	T	T	T	T	T	T
solcap_snp_sl_28247	C	C	C	C	C	C	C	C	C	C	C	C	C	C	C	C	C	C	C	C	C	C	C	C	C	C	C	C	C	C	C	C	C	C	C	C	C	C	C	C	C	C	C	C	C	C	C	C	C
CL016510-0445	C	C	C	C	C	C	C	C	C	C	C	C	C	C	C	C	C	C	C	C	C	C	C	C	C	C	C	C	C	C	C	C	C	C	C	C	C	C	C	C	C	C	C	C	C	C	C	C	C
solcap_snp_sl_43786	G	G	G	G	G	G	G	G	G	G	G	G	G	G	G	G	G	G	G	G	G	G	G	G	G	G	G	G	G	G	G	G	G	G	G	G	G	G	G	G	G	G	G	G	G	G	G	G	G
solcap_snp_sl_43796	G	G	G	G	G	G	G	G	G	G	G	G	G	G	G	G	G	G	G	G	G	G	G	G	G	G	G	G	G	G	G	G	G	G	G	G	G	G	G	G	G	G	G	G	G	G	G	G	G
solcap_snp_sl_43843	C	C	C	C	C	C	C	C	C	C	C	C	C	C	C	C	C	C	C	C	C	C	C	C	C	C	C	C	C	C	C	C	C	C	C	C	C	C	C	C	C	C	C	C	C	C	C	C	C
SGN-U314898_snp260	A	A	A	A	A	A	A	A	A	A	A	A	A	A	A	A	A	A	A	A	A	A	A	A	A	A	A	A	A	A	A	A	A	A	A	A	A	A	A	A	A	A	A	A	A	A	A	A	A
CL000132-1036	C	C	C	C	C	C	C	C	C	C	C	C	C	C	C	C	C	C	C	C	C	C	C	C	C	C	C	C	C	C	C	C	C	C	C	C	C	C	C	C	C	C	C	C	C	C	C	C	C
solcap_snp_sl_43857	C	C	C	C	C	C	C	C	C	C	C	C	C	C	C	C	C	C	C	C	C	C	C	C	C	C	C	C	C	C	C	C	C	C	C	C	C	C	C	C	C	C	C	C	C	C	C	C	C
solcap_snp_sl_43894	T	T	T	T	T	T	T	T	T	T	T	T	T	T	T	T	T	T	T	T	T	T	T	T	T	T	T	T	T	T	T	T	T	W	T	T	T	T	T	T	T	T	T	T	T	T	T	T	T
solcap_snp_sl_43895	A	A	A	A	A	A	A	A	A	A	A	A	A	A	A	A	A	A	A	A	A	A	A	A	A	A	A	A	A	A	A	A	A	R	A	A	A	A	A	A	A	A	A	A	A	A	A	A	A
solcap_snp_sl_43900	G	G	G	G	G	G	G	G	G	G	G	G	G	G	G	G	G	G	G	G	G	G	G	G	G	G	G	G	G	G	G	G	G	G	G	G	G	G	G	G	G	G	G	G	G	G	G	G	G
ZDS_Promoter_SNP1	G	G	G	G	G	G	G	G	G	G	G	G	G	G	G	G	G	G	G	G	G	G	G	G	G	G	G	G	G	G	G	G	G	G	G	G	G	G	G	G	G	G	G	G	G	G	G	G	G
solcap_snp_sl_43902	T	T	T	T	T	T	T	T	T	T	T	T	T	T	T	T	T	T	T	T	T	T	T	T	T	T	T	T	T	T	T	T	T	Y	T	T	T	T	T	T	T	T	T	T	T	T	T	T	T
solcap_snp_sl_43920	A	A	A	A	A	A	A	A	A	A	A	A	A	A	A	A	A	A	A	A	A	A	A	A	A	A	A	A	A	A	A	A	A	A	A	A	A	A	A	A	A	A	A	A	A	A	A	A	A
solcap_snp_sl_43935	T	T	T	T	T	T	T	T	T	T	T	T	T	T	T	T	T	T	T	T	T	T	T	T	T	T	T	T	T	T	T	T	T	T	T	T	T	T	T	T	T	T	T	T	T	T	T	T	T
solcap_snp_sl_17351	T	T	T	T	T	T	T	T	T	T	T	T	T	T	T	T	T	T	T	T	T	T	T	T	T	T	T	T	T	T	T	T	T	W	T	T	T	T	T	T	T	T	T	T	T	T	T	W	T
solcap_snp_sl_43979	G	G	G	G	G	G	G	G	G	G	G	G	G	G	G	G	G	G	G	G	G	G	G	G	G	G	G	G	G	G	G	G	G	G	G	G	G	G	G	G	G	G	G	G	G	G	G	G	G
solcap_snp_sl_44009	A	A	A	A	A	A	A	A	A	A	A	A	A	A	A	A	A	A	A	A	A	A	A	A	A	A	A	A	A	A	A	A	A	M	A	A	A	A	A	A	A	A	A	A	A	A	A	A	A
solcap_snp_sl_44036	G	G	G	G	G	G	G	G	G	G	G	G	G	G	G	G	G	G	G	G	G	G	G	G	G	G	G	G	G	G	G	G	G	G	G	G	G	G	G	G	G	G	G	G	G	G	G	G	G
solcap_snp_sl_44048	T	T	T	T	T	T	T	T	T	T	T	T	T	T	T	T	T	T	T	T	T	T	T	T	T	T	T	T	T	T	T	T	T	K	T	T	T	T	T	T	T	T	T	T	T	T	T	T	T
solcap_snp_sl_23344	C	C	C	C	C	C	C	C	C	C	C	C	C	C	C	C	C	C	C	C	C	C	C	C	C	C	C	C	C	C	C	C	C	C	C	C	C	C	C	C	C	C	C	C	C	C	C	C	C
SL10259_338	C	C	C	C	C	C	C	C	C	C	C	C	C	C	C	C	C	C	C	C	C	C	C	C	C	C	C	C	C	C	C	C	C	C	C	C	C	C	C	C	C	C	C	C	C	C	C	C	C
solcap_snp_sl_44108	T	T	T	T	T	T	T	T	T	T	T	T	T	T	T	T	T	T	T	T	T	T	T	T	T	T	T	T	T	T	T	T	T	T	T	T	T	T	T	T	T	T	T	T	T	T	T	T	T
solcap_snp_sl_44147	T	T	T	T	T	T	T	T	T	T	T	T	T	T	T	T	T	T	T	T	T	T	T	T	T	T	T	T	T	T	T	T	T	W	T	T	T	T	T	T	T	T	T	T	T	T	T	T	T
solcap_snp_sl_44168	C	C	C	C	C	C	C	C	C	C	C	C	C	C	C	C	C	C	C	C	C	C	C	C	C	C	C	C	C	C	C	C	C	C	C	C	C	C	C	C	C	C	C	C	C	C	C	C	C
solcap_snp_sl_28287	C	C	C	C	T	C	C	C	C	C	C	C	C	C	C	C	C	C	C	C	C	C	C	C	C	C	C	C	C	C	C	C	C	C	C	C	C	C	C	C	C	C	C	C	C	C	C	Y	C
solcap_snp_sl_44190	G	G	G	G	G	G	G	G	G	G	G	G	G	G	G	G	G	G	G	G	G	G	G	G	G	G	G	G	G	G	G	G	G	R	G	G	G	G	G	G	G	G	G	G	G	G	G	G	G
solcap_snp_sl_44213	G	G	G	G	G	G	G	G	G	G	G	G	G	G	G	G	G	G	G	G	G	G	G	G	R	G	G	G	G	G	G	G	G	R	G	R	G	G	G	G	R	G	G	G	G	G	G	R	G
CL017666-0495	T	T	T	T	T	T	T	T	T	T	T	T	T	T	T	T	T	T	T	T	T	T	T	T	Y	T	T	T	T	T	T	T	T	T	T	Y	T	T	T	T	Y	T	T	T	T	T	T	Y	T
solcap_snp_sl_44266	T	T	T	T	T	T	T	T	T	T	T	T	T	T	T	T	T	T	T	T	T	T	T	T	Y	T	T	T	T	T	T	T	T	T	T	Y	T	T	T	T	Y	T	T	T	T	T	T	Y	T
solcap_snp_sl_28295	G	G	G	G	G	G	G	G	G	G	G	G	G	G	G	G	G	G	G	G	G	G	G	G	G	G	G	G	G	G	G	G	G	G	G	G	G	G	G	G	G	G	G	G	G	G	G	G	G
solcap_snp_sl_44305	A	A	A	A	A	A	A	A	A	A	A	A	A	A	A	A	A	A	A	A	A	A	A	A	R	A	A	A	A	A	A	A	A	A	A	R	A	A	A	A	R	A	A	A	A	A	A	A	A
solcap_snp_sl_2437	C	C	T	Y	C	T	C	C	C	C	C	C	T	C	C	C	Y	T	Y	C	Y	C	C	C	C	T	T	Y	C	C	C	C	Y	Y	Y	C	C	C	C	C	C	Y	C	C	Y	C	C	Y	Y
solcap_snp_sl_2438	A	A	T	W	A	T	A	A	A	A	A	A	T	A	A	A	W	T	W	A	W	A	A	A	W	T	T	W	A	A	A	A	W	W	W	W	A	A	A	A	W	W	A	A	W	A	A	W	W
solcap_snp_sl_2440	G	G	T	K	G	T	G	G	G	G	G	G	T	G	G	G	K	T	K	G	K	G	G	G	K	T	T	K	G	G	G	G	K	K	K	K	G	G	G	G	K	K	G	G	K	G	G	K	K
solcap_snp_sl_2451	C	C	C	C	C	C	C	C	C	C	C	C	C	C	C	C	C	C	C	C	C	C	C	C	C	C	C	C	C	C	C	C	C	C	C	C	C	C	C	C	C	Y	C	C	C	C	C	C	Y
solcap_snp_sl_2452	C	C	C	C	C	C	C	C	C	C	C	C	C	C	C	C	C	C	C	C	C	C	C	C	M	C	C	C	C	C	C	C	C	C	C	M	C	C	C	C	C	M	C	C	C	C	C	C	M
solcap_snp_sl_2455	A	A	A	A	A	A	A	A	A	A	A	A	A	A	A	A	A	A	A	A	A	A	A	A	R	A	A	A	A	A	A	A	A	A	A	R	A	A	A	A	A	R	A	A	A	A	A	A	R
solcap_snp_sl_2457	A	A	A	A	A	A	A	A	A	A	A	A	A	A	A	A	A	A	A	A	A	A	A	A	M	A	A	A	A	A	A	A	A	A	A	M	A	A	A	A	A	M	A	A	A	A	A	A	M
solcap_snp_sl_44370	G	G	G	G	G	G	G	G	G	G	G	G	G	G	G	G	G	G	G	G	G	G	G	G	G	G	G	G	G	G	G	G	G	G	G	G	G	G	G	G	G	G	G	G	G	G	G	G	G
CL015672-0280	C	C	C	C	C	C	C	C	C	C	C	C	C	C	C	C	C	C	C	C	C	C	C	C	Y	C	C	C	C	C	C	C	C	C	C	Y	C	C	C	C	C	C	C	C	C	C	C	C	C
CL017306-0367_solcap_snp_sl_44383	T	T	T	T	T	T	T	T	T	T	T	T	T	T	T	T	T	T	T	T	T	T	T	T	W	T	T	T	T	T	T	T	T	T	T	W	T	T	T	T	T	T	T	T	T	T	T	T	T
solcap_snp_sl_44394	G	G	G	G	G	G	G	G	G	G	G	G	G	G	G	G	G	G	G	G	G	G	G	G	G	G	G	G	G	G	G	G	G	G	G	G	G	G	G	G	G	G	G	G	G	G	G	G	G
CL015829-0286_solcap_snp_sl_44451	A	A	A	A	A	A	A	A	A	A	A	A	A	A	A	A	A	A	A	A	A	A	A	A	R	A	A	A	A	A	A	A	A	A	A	R	A	A	A	A	A	A	A	A	A	A	A	A	A
solcap_snp_sl_2501	T	T	T	T	T	T	T	T	T	T	T	T	T	T	T	T	T	T	T	T	T	T	T	T	T	T	T	T	T	T	T	T	T	T	T	T	T	T	T	T	T	T	T	T	T	T	T	T	T
solcap_snp_sl_44461	A	A	A	A	A	A	A	A	A	A	A	A	A	A	A	A	A	A	A	A	A	A	A	A	R	A	A	A	A	A	A	A	A	A	A	R	A	A	A	A	A	A	A	A	A	A	A	A	A
solcap_snp_sl_2504	G	G	G	G	G	G	G	G	G	G	G	G	G	G	G	G	G	G	G	G	G	G	G	G	R	G	G	G	G	G	G	G	G	G	G	R	G	G	G	G	G	G	G	G	G	G	G	G	G
solcap_snp_sl_2506	A	A	A	A	A	A	A	A	A	A	A	A	A	A	A	A	A	A	A	A	A	A	A	A	A	A	A	A	A	A	A	A	A	A	A	A	A	A	A	A	A	A	A	A	A	A	A	A	A
solcap_snp_sl_2508	C	C	C	C	C	C	C	C	C	C	C	C	C	C	C	C	C	C	C	C	C	C	C	C	S	C	C	C	C	C	C	C	C	C	C	S	C	C	C	C	C	C	C	C	C	C	C	C	C
solcap_snp_sl_2509	C	C	C	C	C	C	C	C	C	C	C	C	C	C	C	C	C	C	C	C	C	C	C	C	Y	C	C	C	C	C	C	C	C	C	C	Y	C	C	C	C	C	C	C	C	C	C	C	C	C
CL016552-0078	C	C	C	C	C	C	C	C	C	C	C	C	C	C	C	C	C	C	C	C	C	C	C	C	Y	C	C	C	C	C	C	C	C	C	C	Y	C	C	C	C	C	C	C	C	C	C	C	C	C
CL016552-0027	T	T	T	T	T	T	T	T	T	T	T	T	T	T	T	T	T	T	T	T	T	T	T	T	T	T	T	T	T	T	T	T	T	T	T	T	T	T	T	T	T	T	T	T	T	T	T	T	T
solcap_snp_sl_44465	C	C	C	C	C	C	C	C	C	C	C	C	C	C	C	C	C	C	C	C	C	C	C	C	Y	C	C	C	C	C	C	C	C	C	C	Y	C	C	C	C	C	C	C	C	C	C	C	C	C
solcap_snp_sl_2510	A	A	A	A	A	A	A	A	A	A	A	A	A	A	A	A	A	A	A	A	A	A	A	A	R	A	A	A	A	A	A	A	A	A	A	R	A	A	A	A	A	A	A	A	A	A	A	A	A
solcap_snp_sl_2515	T	T	T	T	T	T	T	T	T	T	T	T	T	T	T	T	T	T	T	T	T	T	T	T	T	T	T	T	T	T	T	T	T	T	T	T	T	T	T	T	T	T	T	T	T	T	T	T	T
solcap_snp_sl_44470	T	T	T	T	T	T	T	T	T	T	T	T	T	T	T	T	T	T	T	T	T	T	T	T	Y	T	T	T	T	T	T	T	T	T	T	Y	T	T	T	T	T	T	T	T	T	T	T	T	T
solcap_snp_sl_2518	A	A	A	A	A	A	A	A	A	A	A	A	A	A	A	A	A	A	A	A	A	A	A	A	A	A	A	A	A	A	A	A	A	A	A	A	A	A	A	A	A	A	A	A	A	A	A	A	A
solcap_snp_sl_2525	T	T	T	T	T	T	T	T	T	T	T	T	T	T	T	T	T	T	T	T	T	T	T	T	T	T	T	T	T	T	T	T	T	T	T	T	T	T	T	T	T	T	T	T	T	T	T	T	T
SGN-U571854_snp167_solcap_snp_sl_44482	A	A	A	A	A	A	A	A	A	A	A	A	A	A	A	A	A	A	A	A	A	A	A	A	W	A	A	A	A	A	A	A	A	A	A	W	A	A	A	A	A	A	A	A	A	A	A	A	A
solcap_snp_sl_44540	A	A	A	A	A	A	A	A	A	A	A	A	A	A	A	A	A	A	A	A	A	A	A	A	A	A	A	A	A	A	A	A	A	A	A	A	A	A	A	A	A	A	A	A	A	A	A	A	A
solcap_snp_sl_40040	T	T	T	T	T	T	T	T	T	T	T	T	T	T	T	T	T	T	T	T	T	T	T	T	T	T	T	T	T	T	T	T	T	T	T	T	T	T	T	T	T	T	T	T	T	T	T	T	T
solcap_snp_sl_40061	G	G	G	G	G	G	G	G	G	G	G	G	G	G	G	G	G	G	G	G	G	G	G	G	G	G	G	G	G	G	G	G	G	G	G	G	G	G	G	G	G	G	G	G	G	G	G	G	G
solcap_snp_sl_40076	T	T	T	T	T	T	T	T	T	T	T	T	T	T	T	T	T	T	T	T	T	T	T	T	T	T	T	T	T	T	T	T	T	T	T	T	T	T	T	T	T	T	T	T	T	T	T	T	T
solcap_snp_sl_40154	T	T	T	T	T	T	T	T	T	T	T	T	T	T	T	T	T	T	T	T	T	T	T	T	T	T	T	T	T	T	T	T	T	T	T	T	T	T	T	T	T	T	T	G	T	T	T	T	T
solcap_snp_sl_40177	T	T	T	T	T	T	T	T	T	T	T	T	T	T	T	T	T	T	T	T	T	T	T	T	T	T	T	T	T	T	T	T	T	T	T	T	T	T	T	T	T	T	T	C	T	T	T	T	T
solcap_snp_sl_40199	T	T	T	T	T	T	T	T	T	T	T	T	T	T	T	T	T	T	T	T	T	T	T	T	T	T	T	T	T	T	T	T	T	T	T	T	T	T	T	T	T	T	T	C	T	T	T	T	T
solcap_snp_sl_40219	A	A	A	A	A	A	A	A	A	A	A	A	A	A	A	A	A	A	A	A	A	A	A	A	A	A	A	A	A	A	A	A	A	A	A	A	A	A	A	A	A	A	A	G	A	A	A	A	A
CL015751-0365	A	A	A	A	A	A	A	A	A	A	A	A	A	A	A	A	A	A	A	A	A	A	A	A	A	A	A	A	A	A	A	A	A	A	A	A	A	A	A	A	A	A	A	G	A	A	A	A	A
solcap_snp_sl_40284	G	G	G	G	G	G	G	G	G	G	G	G	G	G	G	G	G	G	G	G	G	G	G	G	G	G	G	G	G	G	G	G	G	G	G	G	G	G	G	G	G	G	G	C	G	G	G	G	G
CL016719-0209_solcap_snp_sl_40301	C	C	C	C	C	C	C	C	C	C	C	C	C	C	C	C	C	C	C	C	C	C	C	C	C	C	C	C	C	C	C	C	C	C	C	C	C	C	C	C	C	C	C	T	C	C	C	C	C
solcap_snp_sl_40303	A	A	A	A	A	A	A	A	A	A	A	A	A	A	A	A	A	A	A	A	A	A	A	A	A	A	A	A	A	A	A	A	A	A	A	A	A	A	A	A	A	A	A	G	A	A	A	A	A
solcap_snp_sl_40309	A	A	A	A	A	A	A	A	A	A	A	A	A	A	A	A	A	A	A	A	A	A	A	A	A	A	A	A	A	A	A	A	A	A	A	A	A	A	A	A	A	A	A	C	A	A	A	A	A
SGN-U597311_snp612	A	A	A	A	A	A	A	A	A	A	A	A	A	A	A	A	A	A	A	A	A	A	A	A	A	A	A	A	A	A	A	A	A	A	A	A	A	A	A	A	A	A	A	A	A	A	A	A	A
CL016500-0535	A	A	A	A	A	A	A	A	A	A	A	A	A	A	A	A	A	A	A	A	A	A	A	A	A	A	A	A	A	A	A	A	A	A	A	A	A	A	A	A	A	A	A	A	A	A	A	A	A
CL016500-0058	G	G	G	G	G	G	G	G	G	G	G	G	G	G	G	G	G	G	G	G	G	G	G	G	G	G	G	G	G	G	G	G	G	G	G	G	G	G	G	G	G	G	G	A	G	G	G	G	G
solcap_snp_sl_40364	G	G	G	G	G	G	G	G	G	G	G	G	G	G	G	G	G	G	G	G	G	G	G	G	G	G	G	G	G	G	G	G	G	G	G	G	G	G	G	G	G	G	G	A	G	G	G	G	G
SGN-U576068_snp460_solcap_snp_sl_40366	C	C	T	Y	C	T	C	C	C	C	C	C	T	C	C	C	Y	T	T	C	Y	C	C	C	C	Y	T	C	C	T	C	C	C	Y	Y	C	C	Y	Y	C	C	C	Y	T	T	Y	Y	Y	C
solcap_snp_sl_40410	G	G	G	G	G	G	G	G	G	G	G	G	G	G	G	G	G	G	G	G	G	G	G	G	G	G	G	G	G	G	G	G	G	G	G	G	G	G	G	G	G	G	G	A	G	G	G	G	G
solcap_snp_sl_26866	failed	failed	failed	A	A	A	failed	failed	failed	failed	failed	failed	A	failed	failed	failed	A	A	A	failed	A	A	A	A	A	A	A	failed	A	A	failed	A	A	A	A	A	A	A	A	A	A	A	A	A	A	A	A	A	A
solcap_snp_sl_26867	failed	failed	failed	C	C	C	failed	failed	failed	failed	failed	failed	C	failed	failed	failed	C	C	C	failed	C	C	C	C	C	C	C	failed	C	C	failed	C	C	C	C	C	C	C	C	C	C	C	C	C	C	C	C	C	C
solcap_snp_sl_40466	G	G	G	G	G	G	G	G	G	G	G	G	G	G	G	G	G	G	G	G	G	G	G	G	G	G	G	G	G	G	G	G	G	G	G	G	G	G	G	G	G	G	G	A	G	G	G	G	G
solcap_snp_sl_40488	A	A	A	A	A	A	A	A	A	A	A	A	A	A	A	A	A	A	A	A	A	A	A	A	A	A	A	A	A	A	A	A	A	A	A	A	A	A	A	A	A	A	A	G	A	A	A	A	A
solcap_snp_sl_40498	A	A	A	A	A	A	A	A	A	A	A	A	A	A	A	A	A	A	A	A	A	A	A	A	A	A	A	A	A	A	A	A	A	A	A	A	A	A	A	A	A	A	A	G	A	A	A	A	A
solcap_snp_sl_40527	C	C	C	C	C	C	C	C	C	C	C	C	C	C	C	C	C	C	C	C	C	C	C	C	C	C	C	C	C	C	C	C	C	C	C	C	C	C	C	C	C	C	C	T	C	C	C	C	C
solcap_snp_sl_26879	A	A	A	A	T	A	A	A	A	A	A	A	A	A	A	A	A	A	A	A	A	W	T	T	T	A	A	A	T	A	A	T	W	A	W	T	W	W	W	W	T	T	W	T	A	W	A	W	T
solcap_snp_sl_40571	G	G	G	G	G	G	G	G	G	G	G	G	G	G	G	G	G	G	G	G	G	G	G	G	G	G	G	G	G	G	G	G	G	G	G	G	G	G	G	G	G	G	G	A	G	G	G	G	G
CL015143-0314	T	T	T	T	T	T	T	T	T	T	T	T	T	T	T	T	T	T	T	T	T	T	T	T	T	T	T	T	T	T	T	T	T	T	T	T	T	T	T	T	T	T	T	C	T	T	T	T	T
solcap_snp_sl_40586	A	A	A	A	A	A	A	A	A	A	A	A	A	A	A	A	A	A	A	A	A	A	A	A	A	A	A	A	A	A	A	A	A	A	A	A	A	A	A	A	A	A	A	G	A	A	A	A	A
CL016564-0236_solcap_snp_sl_40595	G	G	G	G	G	G	G	G	G	G	G	G	G	G	G	G	G	G	G	G	G	G	G	G	G	G	G	G	G	G	G	G	G	G	G	G	G	G	G	G	G	G	G	failed	G	G	G	G	G
CL016564-0245	C	C	C	C	C	C	C	C	C	C	C	C	C	C	C	C	C	C	C	C	C	C	C	C	C	C	C	C	C	C	C	C	C	C	C	C	C	C	C	C	C	C	C	C	C	C	C	C	C
SGN-U565150_snp835	A	A	A	A	A	A	A	A	A	A	A	A	A	A	A	A	A	A	A	A	A	A	A	A	A	A	A	A	A	A	A	A	A	A	A	A	A	A	A	A	A	A	A	A	A	A	A	A	A
solcap_snp_sl_36725	T	T	T	T	T	T	T	T	T	T	T	T	T	T	T	T	T	T	T	T	T	T	T	T	T	T	T	T	T	T	T	T	T	T	T	T	T	T	T	T	T	T	T	C	T	T	T	T	T
CL017342-0410	T	T	T	T	T	T	T	T	T	T	T	T	T	T	T	T	T	T	T	T	T	T	T	T	T	T	T	T	T	T	T	T	T	T	T	T	T	T	T	T	T	T	T	A	T	T	T	T	T
CL017342-0589	C	C	C	C	C	C	C	C	C	C	C	C	C	C	C	C	C	C	C	C	C	C	C	C	C	C	C	C	C	C	C	C	C	C	C	C	C	C	C	C	C	C	C	C	C	C	C	C	C
solcap_snp_sl_42259	T	T	T	T	T	T	T	T	T	T	T	T	T	T	T	T	T	T	T	T	T	T	T	T	T	T	T	T	T	T	T	T	T	T	T	T	T	T	T	T	T	T	T	K	T	T	T	T	T
solcap_snp_sl_42255	C	C	C	C	C	C	C	C	C	C	C	C	C	C	C	C	C	C	C	C	C	C	C	C	C	C	C	C	C	C	C	C	C	C	C	C	C	C	C	C	C	C	C	Y	C	C	C	C	C
solcap_snp_sl_54525	G	G	G	G	G	G	G	G	G	G	G	G	G	G	G	G	G	G	G	G	G	G	G	G	G	G	G	G	G	G	G	G	G	G	G	G	G	G	G	G	G	G	G	A	G	G	G	G	G
SGN-U574380_snp1064_solcap_snp_sl_54535	C	C	C	C	C	C	C	C	C	C	C	C	C	C	C	C	C	C	C	C	C	C	C	C	C	C	C	C	C	C	C	C	C	C	C	C	C	C	C	C	C	C	C	C	C	C	C	C	C
3284_1_60_solcap_snp_sl_54547	G	G	G	G	G	G	G	G	G	G	G	G	G	G	G	G	G	G	G	G	G	G	G	G	G	G	G	G	G	R	G	R	G	G	G	G	G	R	R	G	G	A	G	A	R	G	R	G	A
SGN-U313641_snp560	T	T	T	T	T	T	T	T	T	T	T	T	T	T	T	T	T	T	T	T	T	T	T	T	T	T	T	T	T	T	T	T	T	T	T	T	T	T	T	T	T	T	T	T	T	T	T	T	T
CL016298-0380	T	T	T	T	T	T	T	T	T	T	T	T	T	T	T	T	T	T	T	T	T	T	T	T	T	T	T	T	T	T	T	T	T	T	T	T	T	T	T	T	T	T	T	T	T	T	T	T	T
solcap_snp_sl_54581	A	A	A	A	A	A	A	A	A	A	A	A	A	A	A	A	A	A	A	A	A	A	A	A	A	A	A	A	A	A	A	A	A	A	A	A	A	A	A	A	A	A	A	G	A	A	A	R	A
solcap_snp_sl_54589	T	T	T	T	T	T	T	T	T	T	T	T	T	T	T	T	T	T	T	T	T	T	T	T	T	T	T	T	T	T	T	T	T	T	T	T	T	T	T	T	T	T	T	C	T	T	T	Y	T
C2_At1g50020_1125c	A	A	A	A	A	A	A	A	A	A	A	A	A	A	A	A	A	A	A	A	A	A	A	A	A	A	A	A	A	A	A	A	A	A	A	A	A	A	A	A	A	A	A	G	A	A	A	R	A
solcap_snp_sl_31775	G	G	G	G	G	G	G	G	G	G	G	G	G	G	G	G	G	G	G	G	G	G	G	G	G	G	G	G	G	G	G	R	G	G	G	G	G	G	G	G	G	A	G	G	G	G	G	R	A
solcap_snp_sl_31777	G	G	G	G	G	G	G	G	G	G	G	G	G	G	G	G	G	G	G	G	G	G	G	G	G	G	G	G	G	G	G	R	G	G	G	G	G	G	G	G	G	A	G	G	G	G	G	R	A
solcap_snp_sl_54622	C	C	C	C	C	C	C	C	C	C	C	C	C	C	C	C	C	C	C	C	C	C	C	C	C	C	C	C	C	C	C	C	C	C	C	C	C	C	C	C	C	C	C	T	C	C	C	Y	C
CL017439-0390	A	A	A	A	A	A	A	A	A	A	A	A	A	A	A	A	A	A	A	A	A	A	A	A	A	A	A	A	A	A	A	A	A	A	A	A	A	A	A	A	A	A	A	A	A	A	A	A	A
solcap_snp_sl_31778	T	T	T	T	T	T	T	T	T	T	T	T	T	T	T	T	T	T	T	T	T	T	T	C	T	T	T	T	T	Y	T	Y	T	T	T	T	Y	Y	C	T	T	C	T	T	Y	T	Y	T	C
CL017439-0179	T	T	T	T	T	T	T	T	T	T	T	T	T	T	T	T	T	T	T	T	T	T	T	T	T	T	T	T	T	T	T	T	T	T	T	T	T	T	T	T	T	T	T	T	T	T	T	T	T
solcap_snp_sl_6718	C	C	C	C	C	C	C	C	C	C	C	C	C	C	C	C	C	C	C	C	C	C	C	T	C	C	C	C	C	Y	C	Y	C	C	C	C	Y	Y	T	C	C	T	C	T	Y	C	Y	Y	T
CL015970-0397_solcap_snp_sl_54631	A	A	A	A	A	A	A	A	A	A	A	A	A	A	A	A	A	A	A	A	A	A	A	A	A	A	A	A	A	A	A	A	A	A	A	A	A	A	A	A	A	A	A	G	A	A	A	R	A
CL006477-0571	C	C	C	C	C	C	C	C	C	C	C	C	C	C	C	C	C	C	C	C	C	C	C	C	C	C	C	C	C	C	C	C	C	C	C	C	C	C	C	C	C	C	C	C	C	C	C	C	C
solcap_snp_sl_6721	C	C	C	C	C	C	C	C	C	C	C	C	C	C	C	C	C	C	C	C	C	C	C	C	C	C	C	C	C	C	C	Y	C	C	C	C	Y	C	Y	C	C	T	C	C	C	C	C	C	T
solcap_snp_sl_54669	T	T	T	T	T	T	T	T	T	T	T	T	T	T	T	T	T	T	T	T	T	T	T	T	T	T	T	T	T	T	T	T	T	T	T	T	T	T	T	T	T	T	T	C	T	T	T	Y	T
solcap_snp_sl_14323	C	C	C	C	C	C	C	C	C	C	C	C	C	C	C	C	C	C	C	C	C	C	C	C	Y	C	C	C	Y	C	C	Y	C	C	Y	Y	C	Y	C	Y	T	C	C	C	C	C	C	Y	C
solcap_snp_sl_19481	A	A	A	A	G	A	A	A	A	A	A	A	A	A	A	A	A	A	A	A	A	A	G	G	R	A	A	A	A	R	A	A	A	A	A	R	A	R	R	A	A	A	A	G	R	A	R	R	A
solcap_snp_sl_54685	T	T	T	T	T	T	T	T	T	T	T	T	T	T	T	T	T	T	T	T	T	T	T	T	T	T	T	T	T	T	T	T	T	T	T	T	T	T	T	T	T	T	T	C	T	T	T	Y	T
SGN-U580895_snp1396_solcap_snp_sl_54697	G	G	G	G	G	G	G	G	G	G	G	G	G	G	G	G	G	G	G	G	G	G	G	G	G	G	G	G	G	G	G	G	G	G	G	G	G	G	G	G	G	G	G	T	G	G	G	K	G
solcap_snp_sl_54704	T	T	T	T	T	T	T	T	T	T	T	T	T	T	T	T	T	T	T	T	T	T	T	T	T	T	T	T	T	T	T	T	T	T	T	T	T	T	T	T	T	T	T	C	T	T	T	Y	T
CL009130-0498	A	A	A	A	A	A	A	A	A	A	A	A	A	A	A	A	A	A	A	A	A	A	A	A	A	A	A	A	A	A	A	R	A	A	A	A	A	A	A	A	A	G	A	G	A	A	A	R	G
CL009293-0681	G	G	G	G	G	G	G	G	G	G	G	G	G	G	G	G	G	G	G	G	G	G	G	G	G	G	G	G	G	G	G	K	G	G	G	G	G	G	G	G	G	T	G	T	G	G	G	K	T
solcap_snp_sl_54730	T	T	T	T	T	T	T	T	T	T	T	T	T	T	T	T	T	T	T	T	T	T	T	T	T	T	T	T	T	T	T	T	T	T	T	T	T	T	T	T	T	T	T	C	T	T	T	Y	T
solcap_snp_sl_54731	T	T	T	T	T	T	T	T	T	T	T	T	T	T	T	T	T	T	T	T	T	T	T	T	T	T	T	T	T	T	T	T	T	T	T	T	T	T	T	T	T	T	T	A	T	T	T	W	T
solcap_snp_sl_54732	G	G	G	G	G	G	G	G	G	G	G	G	G	G	G	G	G	G	G	G	G	G	G	G	G	G	G	G	G	G	G	G	G	G	G	G	G	G	G	G	G	G	G	T	G	G	G	K	G
CL016668-0365	C	C	C	C	C	C	C	C	C	C	C	C	C	C	C	C	C	C	C	C	C	C	C	C	C	C	C	C	C	C	C	C	C	C	C	C	C	C	C	C	C	C	C	T	C	C	C	Y	C
solcap_snp_sl_54758	G	G	G	G	G	G	G	G	G	G	G	G	G	G	G	G	G	G	G	G	G	G	G	G	G	G	G	G	G	G	G	G	G	G	G	G	G	G	G	G	G	G	G	A	G	G	G	R	G
solcap_snp_sl_54783	C	C	C	C	C	C	C	C	C	C	C	C	C	C	C	C	C	C	C	C	C	C	C	C	C	C	C	C	C	C	C	C	C	C	C	C	C	C	C	C	C	C	C	T	C	C	C	Y	C
Ohase1_Promoter_SNP1	failed	failed	failed	failed	failed	failed	failed	failed	failed	failed	failed	failed	failed	failed	failed	failed	failed	failed	failed	failed	failed	failed	failed	failed	failed	failed	failed	failed	failed	failed	failed	failed	failed	failed	failed	failed	failed	failed	failed	failed	failed	failed	failed	failed	failed	failed	failed	failed	failed
solcap_snp_sl_54809	G	G	G	G	G	G	G	G	G	G	G	G	G	G	G	G	G	G	G	G	G	G	G	G	G	G	G	G	G	G	G	G	G	G	G	G	G	G	G	G	G	G	G	G	G	G	G	G	G
solcap_snp_sl_54854	G	G	G	G	G	G	G	G	G	G	G	G	G	G	G	G	G	G	G	G	G	G	G	G	G	G	G	G	G	G	G	G	G	G	G	G	G	G	G	G	G	G	G	A	G	G	G	R	G
solcap_snp_sl_54883	C	C	C	C	C	C	C	C	C	C	C	C	C	C	C	C	C	C	C	C	C	C	C	C	C	C	C	C	C	C	C	C	C	C	C	C	C	C	C	C	C	C	C	T	C	C	C	Y	C
solcap_snp_sl_48338	G	G	G	G	G	G	G	G	G	G	G	G	G	G	G	G	G	G	G	G	G	G	G	G	G	G	G	G	G	G	G	G	G	G	G	G	G	G	G	G	G	G	G	G	G	G	G	G	G
solcap_snp_sl_48336	G	G	G	G	G	G	G	G	G	G	G	G	G	G	G	G	G	G	G	G	G	G	G	G	G	G	G	G	G	G	G	G	G	G	G	G	G	G	G	G	G	G	G	G	G	G	G	G	G
C2_At2g15890_430_b	T	T	T	T	T	T	T	T	T	T	T	T	T	T	T	T	T	T	T	T	T	T	T	T	W	T	T	T	T	W	T	T	T	T	W	W	T	W	T	T	T	T	T	A	T	T	T	W	T
solcap_snp_sl_13404	C	C	C	C	C	C	C	C	C	C	C	C	C	C	C	C	C	C	C	C	C	M	C	A	M	C	C	C	A	M	C	M	M	C	M	M	C	A	M	C	M	C	C	A	M	M	M	A	C
solcap_snp_sl_29388	G	G	G	G	G	G	G	G	G	G	G	G	G	G	G	G	G	G	G	G	G	R	G	A	R	G	G	G	A	R	G	R	R	G	R	R	G	A	R	G	R	G	G	A	R	R	R	A	G
solcap_snp_sl_48274	A	A	A	A	A	A	A	A	A	A	A	A	A	A	A	A	A	A	A	A	A	W	A	T	W	A	A	A	T	W	A	W	W	A	W	W	A	T	W	A	W	A	A	T	W	W	W	T	A
solcap_snp_sl_13402	G	G	G	G	G	G	G	G	G	G	G	G	G	G	G	G	G	G	G	G	G	S	G	C	G	G	G	G	C	G	G	S	S	G	G	G	G	S	S	G	S	G	G	G	G	S	S	S	G
solcap_snp_sl_13401	A	A	A	A	A	A	A	A	A	A	A	A	A	A	A	A	A	A	A	A	A	R	A	G	A	A	A	A	G	A	A	R	R	A	A	A	A	R	R	A	R	A	A	A	A	R	R	R	A
solcap_snp_sl_13399	C	C	C	C	C	C	C	C	C	C	C	C	C	C	C	C	C	C	C	C	C	Y	C	T	Y	C	C	C	T	Y	C	Y	Y	C	Y	Y	C	T	Y	C	Y	C	C	T	Y	Y	Y	T	C
solcap_snp_sl_13398	T	T	T	T	T	T	T	T	T	T	T	T	T	T	T	T	T	T	T	T	T	W	T	A	W	T	T	T	A	W	T	W	W	T	W	W	T	A	W	T	W	T	T	A	W	W	W	A	T
SGN-U580658_snp1717	A	A	A	A	A	A	A	A	A	A	A	A	A	A	A	A	A	A	A	A	A	A	A	A	A	A	A	A	A	A	A	A	A	A	A	A	A	A	A	A	A	A	A	A	A	A	A	A	A
solcap_snp_sl_48255	C	C	C	C	C	C	C	C	C	C	C	C	C	C	C	C	C	C	C	C	C	C	C	C	C	C	C	C	C	C	C	C	C	C	C	C	C	C	C	C	C	C	C	C	C	C	C	C	C
solcap_snp_sl_48243	A	A	A	A	A	A	A	A	A	A	A	A	A	A	A	A	A	A	A	A	A	A	A	A	M	A	A	A	A	M	A	A	A	A	M	M	A	M	A	A	A	A	A	C	M	A	A	M	A
solcap_snp_sl_48237	G	G	G	G	G	G	G	G	G	G	G	G	G	G	G	G	G	G	G	G	G	G	G	G	R	G	G	G	G	R	G	G	G	G	R	R	G	R	G	G	G	G	G	A	R	G	G	R	G
solcap_snp_sl_4283	T	T	T	T	T	T	T	T	T	T	T	T	T	T	T	T	T	T	T	T	T	W	T	A	T	T	T	T	A	T	T	W	W	T	T	T	W	W	A	W	A	T	T	T	T	W	W	W	T
solcap_snp_sl_48209	G	G	G	G	G	G	G	G	G	G	G	G	G	G	G	G	G	G	G	G	G	G	G	G	R	G	G	G	G	R	G	G	G	G	R	R	G	R	G	G	G	G	G	A	R	G	G	R	G
solcap_snp_sl_48181	G	G	G	G	G	G	G	G	G	G	G	G	G	G	G	G	G	G	G	G	G	G	G	G	K	G	G	G	G	K	G	G	G	G	K	K	G	K	G	G	G	G	G	T	K	G	G	K	G
solcap_snp_sl_48179	C	C	C	C	C	C	C	C	C	C	C	C	C	C	C	C	C	C	C	C	C	C	C	C	Y	C	C	C	C	Y	C	C	C	C	Y	Y	C	Y	C	C	C	C	C	T	Y	C	C	Y	C
SGN-U581692_snp378	T	T	T	T	T	T	T	T	T	T	T	T	T	T	T	T	T	T	T	T	T	T	T	T	Y	T	T	T	T	Y	T	T	T	T	Y	Y	T	Y	T	T	T	T	T	C	Y	T	T	Y	T
solcap_snp_sl_48151	C	C	C	C	C	C	C	C	C	C	C	C	C	C	C	C	C	C	C	C	C	C	C	C	Y	C	C	C	C	Y	C	C	C	C	Y	Y	C	Y	C	C	C	C	C	T	Y	C	C	Y	C
solcap_snp_sl_48133	C	C	C	C	C	C	C	C	C	C	C	C	C	C	C	C	C	C	C	C	C	C	C	C	Y	C	C	C	C	Y	C	C	C	C	Y	Y	C	Y	C	C	C	C	C	T	Y	C	C	Y	C
solcap_snp_sl_48121	T	T	T	T	T	T	T	T	T	T	T	T	T	T	T	T	T	T	T	T	T	T	T	T	K	T	T	T	T	K	T	T	T	T	K	K	T	K	T	T	T	T	T	G	K	T	T	K	T
solcap_snp_sl_48117	A	A	A	A	A	A	A	A	A	A	A	A	A	A	A	A	A	A	A	A	A	A	A	A	R	A	A	A	A	R	A	A	A	A	R	R	A	R	A	A	A	A	A	G	R	A	A	R	A
solcap_snp_sl_48115	T	T	T	T	T	T	T	T	T	T	T	T	T	T	T	T	T	T	T	T	T	T	T	T	Y	T	T	T	T	Y	T	T	T	T	Y	Y	T	Y	T	T	T	T	T	C	Y	T	T	Y	T
CL017046-0184	T	T	T	T	T	T	T	T	T	T	T	T	T	T	T	T	T	T	T	T	T	T	T	T	T	T	T	T	T	T	T	T	T	T	T	T	T	T	T	T	T	T	T	T	T	T	T	T	T
CL009031-0566	C	C	C	C	C	C	C	C	C	C	C	C	C	C	C	C	C	C	C	C	C	C	C	C	C	C	C	C	C	C	C	C	C	C	C	C	C	C	C	C	C	C	C	C	C	C	C	C	C
solcap_snp_sl_48097	G	G	G	G	G	G	G	G	G	G	G	G	G	G	G	G	G	G	G	G	G	G	G	G	R	G	G	G	G	R	G	G	G	G	R	R	G	R	G	G	G	G	G	A	R	G	R	R	G
solcap_snp_sl_48077	T	T	T	T	T	T	T	T	T	T	T	T	T	T	T	T	T	T	T	T	T	T	T	T	Y	T	T	T	T	Y	T	T	T	T	Y	Y	T	Y	T	T	T	T	T	C	Y	T	Y	Y	T
solcap_snp_sl_48043	A	A	A	A	A	A	A	A	A	A	A	A	A	A	A	A	A	A	A	A	A	A	A	A	G	A	A	A	A	R	A	A	A	A	R	G	A	G	R	A	R	A	A	G	R	A	R	R	A
solcap_snp_sl_50683	C	C	C	C	C	C	C	C	C	C	C	C	C	C	C	C	C	C	C	C	C	C	C	C	T	C	C	C	C	Y	C	C	C	C	Y	T	C	T	Y	C	Y	C	C	T	Y	C	Y	Y	C
SGN-U573826_snp1014_solcap_snp_sl_53877	T	T	T	T	T	T	T	T	T	T	T	T	T	T	T	T	T	T	T	T	T	T	T	T	A	T	T	T	T	W	T	T	T	T	W	A	T	A	W	T	W	T	T	A	W	T	W	W	T
solcap_snp_sl_53871	A	A	A	A	A	A	A	A	A	A	A	A	A	A	A	A	A	A	A	A	A	A	A	A	G	A	A	A	A	R	A	A	A	A	R	G	A	G	R	A	R	A	A	G	R	A	R	R	A
solcap_snp_sl_53870	A	A	A	A	A	A	A	A	A	A	A	A	A	A	A	A	A	A	A	A	A	A	A	A	T	A	A	A	A	W	A	A	A	A	W	T	A	T	W	A	W	A	A	T	W	A	W	W	A
CL015665-0595	A	A	A	A	A	A	A	A	A	A	A	A	A	A	A	A	A	A	A	A	A	A	A	A	A	A	A	A	A	A	A	A	A	A	A	A	A	A	A	A	A	A	A	A	A	A	A	A	A
solcap_snp_sl_53864	T	T	T	T	T	T	T	T	T	T	T	T	T	T	T	T	T	T	T	T	T	T	T	T	C	T	T	T	T	Y	T	T	T	T	Y	C	T	C	Y	T	Y	T	T	C	Y	T	Y	Y	T
solcap_snp_sl_53862	A	A	A	A	A	A	A	A	A	A	A	A	A	A	A	A	A	A	A	A	A	A	A	A	G	A	A	A	A	R	A	A	A	A	R	G	A	G	R	A	R	A	A	G	R	A	R	R	A
SGN-U313729_snp305	T	T	T	T	T	T	T	T	T	T	T	T	T	T	T	T	T	T	T	T	T	T	T	T	G	T	T	T	T	K	T	T	T	T	K	G	T	G	K	T	K	T	T	G	K	T	K	K	T
CL016082-0560	G	G	G	G	G	G	G	G	G	G	G	G	G	G	G	G	G	G	G	G	G	G	G	G	A	G	G	G	G	R	G	G	G	G	R	A	G	A	R	G	R	G	G	A	R	G	R	R	G
solcap_snp_sl_53846	T	T	T	T	T	T	T	T	T	T	T	T	T	T	T	T	T	T	T	T	T	T	T	T	Y	T	T	T	T	T	T	T	T	T	T	Y	T	Y	Y	T	Y	T	T	T	T	T	Y	T	T
solcap_snp_sl_53812	T	T	T	T	T	T	T	T	T	T	T	T	T	T	T	T	T	T	T	T	T	T	T	T	C	T	T	T	T	Y	T	T	T	T	Y	C	T	C	Y	T	Y	T	T	C	Y	T	Y	Y	T
SGN-U581283_snp1102_solcap_snp_sl_53749	C	C	C	C	C	C	C	C	C	C	C	C	C	C	C	C	C	C	C	C	C	C	C	C	T	C	C	C	C	Y	C	C	C	C	Y	T	C	T	Y	C	Y	C	C	T	Y	Y	Y	Y	C
solcap_snp_sl_53743	C	C	C	C	C	C	C	C	C	C	C	C	C	C	C	C	C	C	C	C	C	C	C	C	A	C	C	C	C	M	C	C	C	C	M	A	C	A	M	C	M	C	C	A	M	M	M	M	C
CL016160-0228	G	G	G	G	G	G	G	G	G	G	G	G	G	G	G	G	G	G	G	G	G	G	G	G	G	G	G	G	G	G	G	G	G	G	G	G	G	G	G	G	G	G	G	G	G	G	G	G	G
SGN-U581138_snp1171_solcap_snp_sl_53721	G	G	G	G	G	G	G	G	G	G	G	G	G	G	G	G	G	G	G	G	G	G	G	G	C	G	G	G	G	S	G	G	G	G	S	C	G	C	S	G	S	G	G	C	S	S	S	S	G
CL015806-0417_solcap_snp_sl_53692	C	C	C	C	C	C	C	C	C	C	C	C	C	C	C	C	C	C	C	C	C	C	C	C	T	C	C	C	C	Y	C	C	C	C	Y	T	C	T	Y	C	Y	C	C	T	Y	Y	Y	Y	C
solcap_snp_sl_53671	T	T	T	T	T	T	T	T	T	T	T	T	T	T	T	T	T	T	T	T	T	T	T	T	C	T	T	T	T	Y	T	T	T	T	Y	C	T	C	Y	T	Y	T	T	C	Y	Y	Y	Y	T
solcap_snp_sl_53654	C	C	C	C	C	C	C	C	C	C	C	C	C	C	C	C	C	C	C	C	C	C	C	C	T	C	C	C	C	Y	C	C	C	C	Y	T	C	T	Y	C	Y	C	C	T	Y	Y	Y	Y	C
solcap_snp_sl_53630	T	T	T	T	T	T	T	T	T	T	T	T	T	T	T	T	T	T	T	T	T	T	T	T	C	T	T	T	T	Y	T	T	T	T	Y	C	T	C	Y	T	Y	T	T	C	Y	Y	Y	Y	T
solcap_snp_sl_53612	A	A	A	A	A	A	A	A	A	A	A	A	A	A	A	A	A	A	A	A	A	A	A	A	R	A	A	A	A	A	A	A	A	A	A	R	A	R	R	A	R	A	A	A	A	R	R	A	A
solcap_snp_sl_56930	G	G	G	G	G	G	G	G	G	G	G	G	G	G	G	G	G	G	G	G	G	G	G	G	G	G	G	G	G	G	G	G	G	G	G	G	G	G	G	G	G	G	G	G	G	G	G	G	G
solcap_snp_sl_7396	C	C	C	C	C	C	C	C	C	C	C	C	C	C	C	C	C	C	C	C	C	C	C	C	C	C	C	C	C	C	C	C	C	C	C	C	C	C	C	C	C	C	C	C	C	C	C	C	C
solcap_snp_sl_7398	T	T	T	T	T	T	T	T	T	T	T	T	T	T	T	T	T	T	T	T	T	T	T	T	Y	T	T	T	T	T	T	T	T	T	T	T	T	Y	T	T	T	T	T	T	T	T	T	T	T
SL10205_435	G	G	G	G	G	G	G	G	G	G	G	G	G	G	G	G	G	G	G	G	G	G	G	G	G	G	G	G	G	G	G	G	G	G	G	G	G	G	G	G	G	G	G	G	G	G	G	G	G
CL009078-0683	A	A	A	A	A	A	A	A	A	A	A	A	A	A	A	A	A	A	A	A	A	A	A	A	A	A	A	A	A	A	A	A	A	A	A	A	A	A	A	A	A	A	A	A	A	A	A	A	A
CL009078-0561	T	T	T	T	T	T	T	T	T	T	T	T	T	T	T	T	T	T	T	T	T	T	T	T	T	T	T	T	T	T	T	T	T	T	T	T	T	T	T	T	T	T	T	T	T	T	T	T	T
SL10351_878	A	A	A	A	A	A	A	A	A	A	A	A	A	A	A	A	A	A	A	A	A	A	A	A	A	A	A	A	A	A	A	A	A	A	A	A	A	A	A	A	A	A	A	A	A	A	A	A	A
solcap_snp_sl_19822	C	C	C	Y	T	C	C	T	T	C	C	C	T	C	T	C	Y	C	C	T	Y	T	T	T	T	T	C	C	T	Y	T	Y	T	Y	Y	T	T	T	Y	Y	T	T	T	C	Y	Y	T	T	T
solcap_snp_sl_56940	A	A	A	A	A	A	A	A	A	A	A	A	A	A	A	A	A	A	A	A	A	A	A	A	R	A	A	A	A	A	A	A	A	A	A	A	A	R	A	A	A	A	A	A	A	A	A	A	A
solcap_snp_sl_7408	A	A	A	A	A	A	A	A	A	A	A	A	A	A	A	A	A	A	A	A	A	A	A	A	A	A	A	A	A	A	A	A	A	A	A	A	A	A	A	A	A	A	A	A	A	A	A	A	A
solcap_snp_sl_56941	T	T	T	T	T	T	T	T	T	T	T	T	T	T	T	T	T	T	T	T	T	T	T	T	Y	T	failed	T	T	T	T	T	T	T	T	T	T	Y	T	T	T	T	T	T	T	T	T	T	T
solcap_snp_sl_7409	G	G	G	G	G	G	G	G	G	G	G	G	G	G	G	G	G	G	G	G	G	G	G	G	G	G	G	G	G	G	G	G	G	G	G	G	G	G	G	G	G	G	G	G	G	G	G	G	G
solcap_snp_sl_56942	G	G	G	G	G	G	G	G	G	G	G	G	G	G	G	G	G	G	G	G	G	G	G	G	G	G	G	G	G	G	G	G	G	G	G	G	G	G	G	G	G	G	G	G	G	G	G	G	G
solcap_snp_sl_56943	A	A	A	A	A	A	A	A	A	A	A	A	A	A	A	A	A	A	A	A	A	A	A	A	R	A	A	A	A	A	A	A	A	A	A	A	A	R	A	A	A	A	A	A	A	A	A	A	A
solcap_snp_sl_7410	A	A	A	R	G	A	A	G	G	A	A	A	G	A	G	A	R	A	A	G	R	G	G	R	G	G	A	A	G	R	G	R	G	R	R	R	G	G	R	R	G	R	G	A	R	R	G	G	R
solcap_snp_sl_44550	T	T	T	T	T	T	T	T	T	T	T	T	T	T	T	T	T	T	T	T	T	T	T	T	T	T	T	T	T	T	T	T	T	T	T	T	T	T	T	T	T	T	T	T	T	T	T	T	T
solcap_snp_sl_28320	T	T	T	T	T	T	T	T	T	T	T	T	T	T	T	T	T	T	T	T	T	T	T	T	Y	T	T	T	T	T	T	T	T	T	T	T	T	Y	T	T	T	T	T	T	T	T	T	T	T
solcap_snp_sl_2559	A	A	A	A	A	A	A	A	A	A	A	A	A	A	A	A	A	A	A	A	A	A	A	A	R	A	A	A	A	A	A	A	A	A	A	A	A	R	A	A	A	A	A	A	A	A	A	A	A
solcap_snp_sl_17448	A	A	A	W	T	A	A	T	T	A	A	A	T	A	T	A	W	A	A	T	W	T	T	T	T	T	A	failed	T	W	T	W	T	W	W	T	T	T	W	W	T	T	T	A	W	W	T	T	T
solcap_snp_sl_2561	T	T	T	T	T	T	T	T	T	T	T	T	T	T	T	T	T	T	T	T	T	T	T	T	K	T	T	T	T	T	T	T	T	T	T	T	T	K	T	T	T	T	T	T	T	T	T	T	T
solcap_snp_sl_2562	C	C	C	C	C	C	C	C	C	C	C	C	C	C	C	C	C	C	C	C	C	C	C	C	C	C	C	C	C	C	C	C	C	C	C	C	C	C	C	C	C	C	C	C	C	C	C	C	C
solcap_snp_sl_2563	T	T	T	T	T	T	T	T	T	T	T	T	T	T	T	T	T	T	T	T	T	T	T	T	Y	T	T	T	T	T	T	T	T	T	T	T	T	Y	T	T	T	T	T	T	T	T	T	T	T
solcap_snp_sl_2564	C	C	C	C	C	C	C	C	C	C	C	C	C	C	C	C	C	C	C	C	C	C	C	C	M	C	C	C	C	C	C	C	C	C	C	C	C	M	C	C	C	C	C	C	C	C	C	C	C
solcap_snp_sl_2565	T	T	T	T	T	T	T	T	T	T	T	T	T	T	T	T	T	T	T	T	T	T	T	T	T	T	T	T	T	T	T	T	T	T	T	T	T	T	T	T	T	T	T	T	T	T	T	T	T
solcap_snp_sl_2566	A	A	A	A	A	A	A	A	A	A	A	A	A	A	A	A	A	A	A	A	A	A	A	A	M	A	A	A	A	A	A	A	A	A	A	A	A	M	A	A	A	A	A	A	A	A	A	A	A
solcap_snp_sl_2570	A	A	A	A	A	A	A	A	A	A	A	A	A	A	A	A	A	A	A	A	A	A	A	A	M	A	A	A	A	A	A	A	A	A	A	A	A	M	A	A	A	A	A	A	A	A	A	A	A
solcap_snp_sl_2571	A	A	A	A	A	A	A	A	A	A	A	A	A	A	A	A	A	A	A	A	A	A	A	A	R	A	A	A	A	A	A	A	A	A	A	A	A	R	A	A	A	A	A	A	A	A	A	A	A
solcap_snp_sl_2572	A	A	A	A	A	A	A	A	A	A	A	A	A	A	A	A	A	A	A	A	A	A	A	A	R	A	A	A	A	A	A	A	A	A	A	A	A	R	A	A	A	A	A	A	A	A	A	A	A
solcap_snp_sl_2573	G	G	G	G	G	G	G	G	G	G	G	G	G	G	G	G	G	G	G	G	G	G	G	G	G	G	G	G	G	G	G	G	G	G	G	G	G	G	G	G	G	G	G	G	G	G	G	G	G
solcap_snp_sl_44555	C	C	C	C	C	C	C	C	C	C	C	C	C	C	C	C	C	C	C	C	C	C	C	C	Y	C	C	C	C	C	C	C	C	C	C	C	C	Y	C	C	C	C	C	C	C	C	C	C	C
solcap_snp_sl_2575	T	T	T	T	T	T	T	T	T	T	T	T	T	T	T	T	T	T	T	T	T	T	T	T	T	T	T	T	T	T	T	T	T	T	T	T	T	T	T	T	T	T	T	T	T	T	T	T	T
solcap_snp_sl_44556	A	A	A	A	A	A	A	A	A	A	A	A	A	A	A	A	A	A	A	A	A	A	A	A	A	A	A	A	A	A	A	A	A	A	A	A	A	A	A	A	A	A	A	A	A	A	A	A	A
solcap_snp_sl_2580	A	A	A	A	A	A	A	A	A	A	A	A	A	A	A	A	A	A	A	A	A	A	A	A	M	A	A	A	A	A	A	A	A	A	A	A	A	M	A	A	A	A	A	A	A	A	A	A	A
solcap_snp_sl_2590	A	A	A	A	A	A	A	A	A	A	A	A	A	A	A	A	A	A	A	A	A	A	A	A	A	A	A	A	A	A	A	A	A	A	A	A	A	A	A	A	A	A	A	A	A	A	A	A	A
solcap_snp_sl_2591	A	A	A	A	A	A	A	A	A	A	A	A	A	A	A	A	A	A	A	A	A	A	A	A	A	A	A	A	A	A	A	A	A	A	A	A	A	A	A	A	A	A	A	A	A	A	A	A	A
solcap_snp_sl_2592	A	A	A	A	A	A	A	A	A	A	A	A	A	A	A	A	A	A	A	A	A	A	A	A	A	A	A	A	A	A	A	A	A	A	A	A	A	A	A	A	A	A	A	A	A	A	A	A	A
solcap_snp_sl_28328	G	G	G	G	G	G	G	G	G	G	G	G	G	G	G	G	G	G	G	G	G	G	G	G	G	G	G	G	G	G	G	G	G	G	G	G	G	G	G	G	G	G	G	G	G	G	G	G	G
solcap_snp_sl_28329	T	T	T	T	T	T	T	T	T	T	T	T	T	T	T	T	T	T	T	T	T	T	T	T	Y	T	T	T	T	T	T	T	T	T	T	T	T	Y	T	T	T	T	T	T	T	T	T	T	T
solcap_snp_sl_28335	C	C	C	C	C	C	C	C	C	C	C	C	C	C	C	C	C	C	C	C	C	C	C	C	Y	C	C	C	C	C	C	C	C	C	C	C	C	Y	C	C	C	C	C	C	C	C	C	C	C
solcap_snp_sl_28337	C	C	C	C	C	C	C	C	C	C	C	C	C	C	C	C	C	C	C	C	C	C	C	C	C	C	C	C	C	C	C	C	C	C	C	C	C	C	C	C	C	C	C	C	C	C	C	C	C
solcap_snp_sl_28338	A	A	A	A	A	A	A	A	A	A	A	A	A	A	A	A	A	A	A	A	A	A	A	A	R	A	A	A	A	A	A	A	A	A	A	A	A	R	A	A	A	A	A	A	A	A	A	A	A
solcap_snp_sl_44564	T	T	T	T	T	T	T	T	T	T	T	T	T	T	T	T	T	T	T	T	T	T	T	T	T	T	T	T	T	T	T	T	T	T	T	T	T	T	T	T	T	T	T	T	T	T	T	T	T
solcap_snp_sl_2600	G	G	G	G	G	G	G	G	G	G	G	G	G	G	G	G	G	G	G	G	G	G	G	G	R	G	G	G	G	G	G	G	G	G	G	G	G	R	G	G	G	G	G	G	G	G	G	G	G
solcap_snp_sl_2603	G	G	G	G	G	G	G	G	G	G	G	G	G	G	G	G	G	G	G	G	G	G	G	G	G	G	G	G	G	G	G	G	G	G	G	G	G	G	G	G	G	G	G	G	G	G	G	G	G
solcap_snp_sl_28340	C	C	C	C	C	C	C	C	C	C	C	C	C	C	C	C	C	C	C	C	C	C	C	C	C	C	C	C	C	C	C	C	C	C	C	C	C	C	C	C	C	C	C	C	C	C	C	C	C
solcap_snp_sl_2604	T	T	T	T	T	T	T	T	T	T	T	T	T	T	T	T	T	T	T	T	T	T	T	T	T	T	T	T	T	T	T	T	T	T	T	T	T	T	T	T	T	T	T	T	T	T	T	T	T
solcap_snp_sl_28343	C	C	C	C	C	C	C	C	C	C	C	C	C	C	C	C	C	C	C	C	C	C	C	C	S	C	C	C	C	C	C	C	C	C	C	C	C	S	C	C	C	C	C	C	C	C	C	C	C
solcap_snp_sl_2606	A	A	A	A	A	A	A	A	A	A	A	A	A	A	A	A	A	A	A	A	A	A	A	A	A	A	A	A	A	A	A	A	A	A	A	A	A	A	A	A	A	A	A	A	A	A	A	A	A
solcap_snp_sl_2607	T	T	T	T	T	T	T	T	T	T	T	T	T	T	T	T	T	T	T	T	T	T	T	T	W	T	T	T	T	T	T	T	T	T	T	T	T	W	T	T	T	T	T	T	T	T	T	T	T
solcap_snp_sl_6260	C	C	C	C	C	C	C	C	C	C	C	C	C	C	C	C	C	C	C	C	C	C	C	C	C	C	C	C	C	C	C	C	C	C	C	C	C	C	C	C	C	C	C	C	C	C	C	C	C
solcap_snp_sl_6259	T	T	T	T	T	T	T	T	T	T	T	T	T	T	T	T	T	T	T	T	T	T	T	T	T	T	T	T	T	T	T	T	T	T	T	T	T	T	T	T	T	T	T	T	T	T	T	T	T
solcap_snp_sl_6255	A	A	A	A	A	A	A	A	A	A	A	A	A	A	A	A	A	A	A	A	A	A	A	R	A	A	A	A	A	A	A	A	A	A	A	R	A	A	A	A	A	R	A	A	A	A	A	A	R
solcap_snp_sl_6253	C	C	C	C	C	C	C	C	C	C	C	C	C	C	C	C	C	C	C	C	C	C	C	C	C	C	C	C	C	C	C	C	C	C	C	C	C	C	C	C	C	C	C	C	C	C	C	C	C
solcap_snp_sl_6249	A	A	A	A	A	A	A	A	A	A	A	A	A	A	A	A	A	A	A	A	A	A	A	A	A	A	A	A	A	A	A	A	A	A	A	A	A	A	A	A	A	A	A	A	A	A	A	A	A
solcap_snp_sl_6247	G	G	G	G	G	G	G	G	G	G	G	G	G	G	G	G	G	G	G	G	G	G	G	G	R	G	G	G	G	G	G	G	G	G	G	G	G	R	G	G	G	G	G	G	G	G	G	G	G
solcap_snp_sl_31198	G	G	G	G	G	G	G	G	G	G	G	G	G	G	G	G	G	G	G	G	G	G	G	G	G	G	G	G	G	G	G	G	G	G	G	G	G	G	G	G	G	G	G	G	G	G	G	G	G
solcap_snp_sl_31196	C	C	C	C	C	C	C	C	C	C	C	C	C	C	C	C	C	C	C	C	C	C	C	C	C	C	C	C	C	C	C	C	C	C	C	C	C	C	C	C	C	C	C	C	C	C	C	C	C
solcap_snp_sl_6240	A	A	A	A	A	A	A	A	A	A	A	A	A	A	A	A	A	A	A	A	A	A	A	A	R	A	A	A	A	A	A	A	A	A	A	A	A	R	A	A	A	A	A	A	A	A	A	A	A
solcap_snp_sl_6239	C	C	C	C	C	C	C	C	C	C	C	C	C	C	C	C	C	C	C	C	C	C	C	C	Y	C	C	C	C	C	C	C	C	C	C	C	C	Y	C	C	C	C	C	C	C	C	C	C	C
solcap_snp_sl_6238	C	C	C	C	C	C	C	C	C	C	C	C	C	C	C	C	C	C	C	C	C	C	C	C	C	C	C	C	C	C	C	C	C	C	C	C	C	C	C	C	C	C	C	C	C	C	C	C	C
solcap_snp_sl_31193	T	T	T	T	T	T	T	T	T	T	T	T	T	T	T	T	T	T	T	T	T	T	T	T	K	T	T	T	T	T	T	T	T	T	T	T	T	K	T	T	T	T	T	T	T	T	T	T	T
solcap_snp_sl_31192	C	C	C	C	C	C	C	C	C	C	C	C	C	C	C	C	C	C	C	C	C	C	C	C	C	C	C	C	C	C	C	C	C	C	C	C	C	C	C	C	C	C	C	C	C	C	C	C	C
solcap_snp_sl_31191	T	T	T	T	T	T	T	T	T	T	T	T	T	T	T	T	T	T	T	T	T	T	T	T	Y	T	T	T	T	T	T	T	T	T	T	T	T	Y	T	T	T	T	T	T	T	T	T	T	T
solcap_snp_sl_31190	T	T	T	T	T	T	T	T	T	T	T	T	T	T	T	T	T	T	T	T	T	T	T	T	Y	T	T	T	T	T	T	T	T	T	T	T	T	Y	T	T	T	T	T	T	T	T	T	T	T
solcap_snp_sl_31189	C	C	C	C	C	C	C	C	C	C	C	C	C	C	C	C	C	C	C	C	C	C	C	C	C	C	C	C	C	C	C	C	C	C	C	C	C	C	C	C	C	C	C	C	C	C	C	C	C
solcap_snp_sl_6233	C	C	C	C	C	C	C	C	C	C	C	C	C	C	C	C	C	C	C	C	C	C	C	C	C	C	C	C	C	C	C	C	C	C	C	C	C	C	C	C	C	C	C	C	C	C	C	C	C
solcap_snp_sl_53126	A	A	A	A	A	A	A	A	A	A	A	A	A	A	A	A	A	A	A	A	A	A	A	A	R	A	A	A	A	A	A	A	A	A	A	A	A	R	A	A	A	A	A	A	A	A	A	A	A
solcap_snp_sl_6229	T	T	T	T	T	T	T	T	T	T	T	T	T	T	T	T	T	T	T	T	T	T	T	T	T	T	T	T	T	T	T	T	T	T	T	T	T	T	T	T	T	T	T	T	T	T	T	T	T
solcap_snp_sl_6228	C	C	C	C	C	C	C	C	C	C	C	C	C	C	C	C	C	C	C	C	C	C	C	C	C	C	C	C	C	C	C	C	C	C	C	C	C	C	C	C	C	C	C	C	C	C	C	C	C
solcap_snp_sl_6227	G	G	G	G	G	G	G	G	G	G	G	G	G	G	G	G	G	G	G	G	G	G	G	G	G	G	G	G	G	G	G	G	G	G	G	G	G	G	G	G	G	G	G	G	G	G	G	G	G
solcap_snp_sl_6226	T	T	T	T	T	T	T	T	T	T	T	T	T	T	T	T	T	T	T	T	T	T	T	T	Y	T	T	T	T	T	T	T	T	T	T	T	T	Y	T	T	T	T	T	T	T	T	T	T	T
solcap_snp_sl_31184	C	C	C	C	C	C	C	C	C	C	C	C	C	C	C	C	C	C	C	C	C	C	C	C	C	C	C	C	C	C	C	C	C	C	C	C	C	C	C	C	C	C	C	C	C	C	C	C	C
solcap_snp_sl_6221	C	C	C	C	C	C	C	C	C	C	C	C	C	C	C	C	C	C	C	C	C	C	C	C	C	C	C	C	C	C	C	C	C	C	C	C	C	C	C	C	C	C	C	C	C	C	C	C	C
solcap_snp_sl_31179	G	G	G	G	G	G	G	G	G	G	G	G	G	G	G	G	G	G	G	G	G	G	G	G	G	G	G	G	G	G	G	G	G	G	G	G	G	G	G	G	G	G	G	G	G	G	G	G	G
solcap_snp_sl_6206	C	C	C	C	C	C	C	C	C	C	C	C	C	C	C	C	C	C	C	C	C	C	C	C	Y	C	C	C	C	C	C	C	C	C	C	C	C	Y	C	C	C	C	C	C	C	C	C	C	C
solcap_snp_sl_6203	C	C	C	C	C	C	C	C	C	C	C	C	C	C	C	C	C	C	C	C	C	C	C	C	C	C	C	C	C	C	C	C	C	C	C	C	C	C	C	C	C	C	C	C	C	C	C	C	C
solcap_snp_sl_6202	T	T	T	T	T	T	T	T	T	T	T	T	T	T	T	T	T	T	T	T	T	T	T	T	T	T	T	T	T	T	T	T	T	T	T	T	T	T	T	T	T	T	T	T	T	T	T	T	T
solcap_snp_sl_6201	T	T	T	T	T	T	T	T	T	T	T	T	T	T	T	T	T	T	T	T	T	T	T	T	Y	T	T	T	T	T	T	T	T	T	T	T	T	Y	T	T	T	T	T	T	T	T	T	T	T
solcap_snp_sl_6199	A	A	A	A	A	A	A	A	A	A	A	A	A	A	A	A	A	A	A	A	A	A	A	A	R	A	A	A	A	A	A	A	A	A	A	A	A	R	A	A	A	A	A	A	A	A	A	A	A
solcap_snp_sl_6196	C	C	C	C	C	C	C	C	C	C	C	C	C	C	C	C	C	C	C	C	C	C	C	C	C	C	C	C	C	C	C	C	C	C	C	S	C	C	C	C	C	S	C	C	C	C	C	C	S
solcap_snp_sl_6195	G	G	G	G	G	G	G	G	G	G	G	G	G	G	G	G	G	G	G	G	G	G	G	G	G	G	G	G	G	G	G	G	G	G	G	G	G	G	G	G	G	G	G	G	G	G	G	G	G
solcap_snp_sl_6194	A	A	A	A	A	A	A	A	A	A	A	A	A	A	A	A	A	A	A	A	A	A	A	A	R	A	A	A	A	A	A	A	A	A	A	A	A	R	A	A	A	A	A	A	A	A	A	A	A
solcap_snp_sl_31177	C	C	C	C	C	C	C	C	C	C	C	C	C	C	C	C	C	C	C	C	C	C	C	C	C	C	C	C	C	C	C	C	C	C	C	C	C	C	C	C	C	C	C	C	C	C	C	C	C
solcap_snp_sl_6192	T	T	T	T	T	T	T	T	T	T	T	T	T	T	T	T	T	T	T	T	T	T	T	T	Y	T	T	T	T	T	T	T	T	T	T	T	T	Y	T	T	T	T	T	T	T	T	T	T	T
solcap_snp_sl_6190	C	C	C	C	C	C	C	C	C	C	C	C	C	C	C	C	C	C	C	C	C	C	C	C	C	C	C	C	C	C	C	C	C	C	C	C	C	C	C	C	C	C	C	C	C	C	C	C	C
solcap_snp_sl_6189	T	T	T	T	T	T	T	T	T	T	T	T	T	T	T	T	T	T	T	T	T	T	T	T	Y	T	T	T	T	T	T	T	T	T	T	T	T	Y	T	T	T	T	T	T	T	T	T	T	T
solcap_snp_sl_6186	C	C	C	C	C	C	C	C	C	C	C	C	C	C	C	C	C	C	C	C	C	C	C	C	C	C	C	C	C	C	C	C	C	C	C	C	C	C	C	C	C	C	C	C	C	C	C	C	C
solcap_snp_sl_6185	A	A	A	A	A	A	A	A	A	A	A	A	A	A	A	A	A	A	A	A	A	A	A	A	R	A	A	A	A	A	A	A	A	A	A	A	A	R	A	A	A	A	A	A	A	A	A	A	A
solcap_snp_sl_6184	A	A	A	A	A	A	A	A	A	A	A	A	A	A	A	A	A	A	A	A	A	A	A	A	A	A	A	A	A	A	A	A	A	A	A	A	A	A	A	A	A	A	A	A	A	A	A	A	A
solcap_snp_sl_6183	A	A	A	A	A	A	A	A	A	A	A	A	A	A	A	A	A	A	A	A	A	A	A	A	R	A	A	A	A	A	A	A	A	A	A	A	A	R	A	A	A	A	A	A	A	A	A	A	A
solcap_snp_sl_53120	T	T	T	T	T	T	T	T	T	T	T	T	T	T	T	T	T	T	T	T	T	T	T	T	T	T	T	T	T	T	T	T	T	T	T	T	T	T	T	T	T	T	T	T	T	T	T	T	T
solcap_snp_sl_6180	A	A	A	A	A	A	A	A	A	A	A	A	A	A	A	A	A	A	A	A	A	A	A	A	A	A	A	A	A	A	A	A	A	A	A	A	A	A	A	A	A	A	A	A	A	A	A	A	A
solcap_snp_sl_6177	A	A	A	A	A	A	A	A	A	A	A	A	A	A	A	A	A	A	A	A	A	A	A	A	R	A	A	A	A	A	A	A	A	A	A	A	A	R	A	A	A	A	A	A	A	A	A	A	A
solcap_snp_sl_6176	C	C	C	C	C	C	C	C	C	C	C	C	C	C	C	C	C	C	C	C	C	C	C	C	C	C	C	C	C	C	C	C	C	C	C	C	C	C	C	C	C	C	C	C	C	C	C	C	C
solcap_snp_sl_26911	A	A	A	A	A	A	A	A	A	A	A	A	A	A	A	A	A	A	A	A	A	A	A	A	A	A	A	A	A	A	A	A	A	A	A	A	A	A	A	A	A	A	A	A	A	A	A	A	A
solcap_snp_sl_1379	T	T	T	T	T	T	T	T	T	T	T	T	T	T	T	T	T	T	T	T	T	T	T	T	T	T	T	T	T	T	T	T	T	T	T	T	T	T	T	T	T	T	T	T	T	T	T	T	T
solcap_snp_sl_1380	G	G	G	G	G	G	G	G	G	G	G	G	G	G	G	G	G	G	G	G	G	G	G	G	R	G	G	G	G	G	G	G	G	G	G	G	G	R	G	G	G	G	G	G	G	G	G	G	G
solcap_snp_sl_40819	A	A	A	A	A	A	A	A	A	A	A	A	A	A	A	A	A	A	A	A	A	A	A	A	M	A	A	A	A	A	A	A	A	A	A	A	A	M	A	A	A	A	A	A	A	A	A	A	A
solcap_snp_sl_1381	C	C	C	C	C	C	C	C	C	C	C	C	C	C	C	C	C	C	C	C	C	C	C	C	C	C	C	C	C	C	C	C	C	C	C	C	C	C	C	C	C	C	C	C	C	C	C	C	C
solcap_snp_sl_1382	G	G	G	G	G	G	G	G	G	G	G	G	G	G	G	G	G	G	G	G	G	G	G	G	S	G	G	G	G	G	G	G	G	G	G	G	G	S	G	G	G	G	G	G	G	G	G	G	G
solcap_snp_sl_1383	C	C	C	C	C	C	C	C	C	C	C	C	C	C	C	C	C	C	C	C	C	C	C	C	Y	C	C	C	C	C	C	C	C	C	C	C	C	Y	C	C	C	C	C	C	C	C	C	C	C
solcap_snp_sl_1384	T	T	T	T	T	T	T	T	T	T	T	T	T	T	T	T	T	T	T	T	T	T	T	T	Y	T	T	T	T	T	T	T	T	T	T	T	T	Y	T	T	T	T	T	T	T	T	T	T	T
solcap_snp_sl_1385	A	A	A	A	A	A	A	A	A	A	A	A	A	A	A	A	A	A	A	A	A	A	A	A	A	A	A	A	A	A	A	A	A	A	A	A	A	A	A	A	A	A	A	A	A	A	A	A	A
solcap_snp_sl_1386	T	T	T	T	T	T	T	T	T	T	T	T	T	T	T	T	T	T	T	T	T	T	T	T	Y	T	T	T	T	T	T	T	T	T	T	T	T	Y	T	T	T	T	T	T	T	T	T	T	T
solcap_snp_sl_40820	T	T	T	T	T	T	T	T	T	T	T	T	T	T	T	T	T	T	T	T	T	T	T	T	T	T	T	T	T	T	T	T	T	T	T	T	T	T	T	T	T	T	T	T	T	T	T	T	T
solcap_snp_sl_40823	T	T	T	T	T	T	T	T	T	T	T	T	T	T	T	T	T	T	T	T	T	T	T	T	T	T	T	T	T	T	T	T	T	T	T	T	T	T	T	T	T	T	T	T	T	T	T	T	T
solcap_snp_sl_5885	C	C	C	C	C	C	C	C	C	C	C	C	C	C	C	C	C	C	C	C	C	C	C	C	Y	C	C	C	C	C	C	C	C	C	C	C	C	Y	C	C	C	C	C	C	C	C	C	C	C
solcap_snp_sl_31002	A	A	A	A	A	A	A	A	A	A	A	A	A	A	A	A	A	A	A	A	A	A	A	A	R	A	A	A	A	A	A	A	A	A	A	A	A	R	A	A	A	A	A	A	A	A	A	A	A
solcap_snp_sl_52609	T	T	T	T	T	T	T	T	T	T	T	T	T	T	T	T	T	T	T	T	T	T	T	T	Y	T	T	T	T	T	T	T	T	T	T	T	T	Y	T	T	T	T	T	T	T	T	T	T	T
solcap_snp_sl_52608	T	T	T	T	T	T	T	T	T	T	T	T	T	T	T	T	T	T	T	T	T	T	T	T	W	T	T	T	T	T	T	T	T	T	T	T	T	W	T	T	T	T	T	T	T	T	T	T	T
solcap_snp_sl_5884	G	G	G	G	G	G	G	G	G	G	G	G	G	G	G	G	G	G	G	G	G	G	G	G	G	G	G	G	G	G	G	G	G	G	G	G	G	G	G	G	G	G	G	G	G	G	G	G	G
solcap_snp_sl_5883	G	G	G	G	G	G	G	G	G	G	G	G	G	G	G	G	G	G	G	G	G	G	G	G	R	G	G	G	G	G	G	G	G	G	G	G	G	R	G	G	G	G	G	G	G	G	G	G	G
solcap_snp_sl_5882	T	T	T	T	T	T	T	T	T	T	T	T	T	T	T	T	T	T	T	T	T	T	T	T	T	T	T	T	T	T	T	T	T	T	T	T	T	T	T	T	T	T	T	T	T	T	T	T	T
solcap_snp_sl_5881	G	G	G	G	G	G	G	G	G	G	G	G	G	G	G	G	G	G	G	G	G	G	G	G	K	G	G	G	G	G	G	G	G	G	G	G	G	K	G	G	G	G	G	G	G	G	G	G	G
solcap_snp_sl_5879	G	G	G	G	G	G	G	G	G	G	G	G	G	G	G	G	G	G	G	G	G	G	G	G	R	G	G	G	G	G	G	G	G	G	G	G	G	R	G	G	G	G	G	G	G	G	G	G	G
solcap_snp_sl_5875	C	C	C	C	C	C	C	C	C	C	C	C	C	C	C	C	C	C	C	C	C	C	C	C	S	C	C	C	C	C	C	C	C	C	C	C	C	S	C	C	C	C	C	C	C	C	C	C	C
solcap_snp_sl_5872	G	G	G	G	G	G	G	G	G	G	G	G	G	G	G	G	G	G	G	G	G	G	G	G	R	G	G	G	G	G	G	G	G	G	G	G	G	R	G	G	G	G	G	G	G	G	G	G	G
solcap_snp_sl_5871	T	T	T	T	T	T	T	T	T	T	T	T	T	T	T	T	T	T	T	T	T	T	T	T	T	T	T	T	T	T	T	T	T	T	T	T	T	T	T	T	T	T	T	T	T	T	T	T	T
solcap_snp_sl_69276	G	G	G	G	G	G	G	G	G	G	G	G	G	G	G	G	G	G	G	G	G	G	G	G	S	G	G	G	G	G	G	G	G	G	G	G	G	S	G	G	G	G	G	G	G	G	G	G	G
solcap_snp_sl_11572	T	T	T	T	T	T	T	T	T	T	T	T	T	T	T	T	T	T	T	T	T	T	T	T	K	T	T	T	T	T	T	T	T	T	T	T	T	K	T	T	T	T	T	T	T	T	T	T	T
solcap_snp_sl_69274	T	T	T	T	T	T	T	T	T	T	T	T	T	T	T	T	T	T	T	T	T	T	T	T	Y	T	T	T	T	T	T	T	T	T	T	T	T	Y	T	T	T	T	T	T	T	T	T	T	T
solcap_snp_sl_11569	T	T	T	T	T	T	T	T	T	T	T	T	T	T	T	T	T	T	T	T	T	T	T	T	T	T	T	T	T	T	T	T	T	T	T	T	T	T	T	T	T	T	T	T	T	T	T	T	T
solcap_snp_sl_32184	C	C	C	C	C	C	C	C	C	C	C	C	C	C	C	C	C	C	C	C	C	C	C	C	Y	C	C	C	C	C	C	C	C	C	C	C	C	Y	C	C	C	C	C	C	C	C	C	C	C
solcap_snp_sl_32181	C	C	C	C	C	C	C	C	C	C	C	C	C	C	C	C	C	C	C	C	C	C	C	C	C	C	C	C	C	C	C	C	C	C	C	C	C	C	C	C	C	C	C	C	C	C	C	C	C
solcap_snp_sl_7418	G	G	G	G	G	G	G	G	G	G	G	G	G	G	G	G	G	G	G	G	G	G	G	G	G	G	G	G	G	G	G	G	G	G	G	G	G	G	G	G	G	G	G	G	G	G	G	G	G
solcap_snp_sl_7416	A	A	A	A	A	A	A	A	A	A	A	A	A	A	A	A	A	A	A	A	A	A	A	A	W	A	A	A	A	A	A	A	A	A	A	A	A	W	A	A	A	A	A	A	A	A	A	A	A
solcap_snp_sl_56944	A	A	A	A	A	A	A	A	A	A	A	A	A	A	A	A	A	A	A	A	A	A	A	A	failed	A	A	A	A	A	A	A	A	A	A	A	A	failed	A	A	A	A	A	A	A	A	A	A	A
solcap_snp_sl_32178	G	G	G	G	G	G	G	G	G	G	G	G	G	G	G	G	G	G	G	G	G	G	G	G	G	G	G	G	G	G	G	G	G	G	G	G	G	G	G	G	G	G	G	G	G	G	G	G	G
solcap_snp_sl_7413	T	T	T	T	T	T	T	T	T	T	T	T	T	T	T	T	T	T	T	T	T	T	T	T	K	T	T	T	T	T	T	T	T	T	T	T	T	K	T	T	T	T	T	T	T	T	T	T	T
solcap_snp_sl_5308	A	A	A	A	A	A	A	A	A	A	A	A	A	A	A	A	A	A	A	A	A	A	A	A	A	A	A	A	A	A	A	A	A	A	A	A	A	A	A	A	A	A	A	A	A	A	A	A	A
Le005962_147	A	A	A	A	A	A	A	A	A	A	A	A	A	A	A	A	A	A	A	A	A	A	A	A	A	A	A	A	A	A	A	A	A	A	A	A	A	A	A	A	A	A	A	A	A	A	A	A	A
solcap_snp_sl_30414	T	T	T	T	T	T	T	T	T	T	T	T	T	T	T	T	T	T	T	T	T	T	T	T	T	T	T	T	T	T	T	T	T	T	T	T	T	T	T	T	T	T	T	T	T	T	T	T	T
solcap_snp_sl_5306	C	C	C	C	C	C	C	C	C	C	C	C	C	C	C	C	C	C	C	C	C	C	C	C	C	C	C	C	C	C	C	C	C	C	C	C	C	C	C	C	C	C	C	C	C	C	C	C	C
solcap_snp_sl_30413	C	C	C	C	C	C	C	C	C	C	C	C	C	C	C	C	C	C	C	C	C	C	C	C	C	C	C	C	C	C	C	C	C	C	C	C	C	C	C	C	C	C	C	C	C	C	C	C	C
solcap_snp_sl_30412	T	T	T	T	T	T	T	T	T	T	T	T	T	T	T	T	T	T	T	T	T	T	T	T	T	T	T	T	T	T	T	T	T	T	T	T	T	T	T	T	T	T	T	T	T	T	T	T	T
solcap_snp_sl_51537	G	G	G	G	G	G	G	G	G	G	G	G	G	G	G	G	G	G	G	G	G	G	G	G	G	G	G	G	G	G	G	G	G	G	G	G	G	G	G	G	G	G	G	G	G	G	G	G	G
solcap_snp_sl_5305	T	T	T	T	T	T	T	T	T	T	T	T	T	T	T	T	T	T	T	T	T	T	T	T	T	T	T	T	T	T	T	T	T	T	T	T	T	T	T	T	T	T	T	T	T	T	T	T	T
solcap_snp_sl_5304	A	A	A	A	A	A	A	A	A	A	A	A	A	A	A	A	A	A	A	A	A	A	A	A	A	A	A	A	A	A	A	A	A	A	A	A	A	A	A	A	A	A	A	A	A	A	A	A	A
solcap_snp_sl_5303	T	T	T	T	T	T	T	T	T	T	T	T	T	T	T	T	T	T	T	T	T	T	T	T	T	T	T	T	T	T	T	T	T	T	T	T	T	T	T	T	T	T	T	T	T	T	T	T	T
solcap_snp_sl_5301	G	G	G	G	G	G	G	G	G	G	G	G	G	G	G	G	G	G	G	G	G	G	G	G	G	G	G	G	G	G	G	G	G	G	G	G	G	G	G	G	G	G	G	G	G	G	G	G	G
solcap_snp_sl_5300	C	C	C	C	C	C	C	C	C	C	C	C	C	C	C	C	C	C	C	C	C	C	C	C	Y	C	C	C	C	C	C	C	C	C	C	C	C	Y	C	C	C	C	C	C	C	C	C	C	C
solcap_snp_sl_5299	T	T	T	T	T	T	T	T	T	T	T	T	T	T	T	T	T	T	T	T	T	T	T	T	Y	T	T	T	T	T	T	T	T	T	T	T	T	Y	T	T	T	T	T	T	T	T	T	T	T
solcap_snp_sl_30409	G	G	G	G	G	G	G	G	G	G	G	G	G	G	G	G	G	G	G	G	G	G	G	G	G	G	G	G	G	G	G	G	G	G	G	G	G	G	G	G	G	G	G	G	G	G	G	G	G
solcap_snp_sl_30408	failed	failed	T	T	T	T	T	T	failed	failed	T	failed	T	T	T	failed	failed	failed	failed	T	failed	failed	T	T	A	failed	failed	failed	T	T	T	T	T	failed	failed	T	failed	A	T	T	failed	failed	failed	failed	failed	T	failed	failed	failed
solcap_snp_sl_5293	T	T	T	T	T	T	T	T	T	T	T	T	T	T	T	T	T	T	T	T	T	T	T	T	failed	T	T	T	T	T	T	T	T	T	T	T	T	T	T	T	T	T	T	T	T	T	T	T	T
solcap_snp_sl_30405	T	T	T	T	T	T	T	T	T	T	T	T	T	T	T	T	T	T	T	T	T	T	T	T	T	T	T	T	T	T	T	T	T	T	T	T	T	T	T	T	T	T	T	T	T	T	T	T	T
solcap_snp_sl_30403	G	G	G	G	G	G	G	G	G	G	G	G	G	G	G	G	G	G	G	G	G	G	G	G	G	G	G	G	G	G	G	G	G	G	G	G	G	G	G	G	G	G	G	G	G	G	G	G	G
solcap_snp_sl_5285	G	G	G	G	G	G	G	G	G	G	G	G	G	G	G	G	G	G	G	G	G	G	G	G	G	G	G	G	G	G	G	G	G	G	G	G	G	G	G	G	G	G	G	G	G	G	G	G	G
solcap_snp_sl_5284	C	C	C	C	C	C	C	C	C	C	C	C	C	C	C	C	C	C	C	C	C	C	C	C	C	C	C	C	C	C	C	C	C	C	C	C	C	C	C	C	C	C	C	C	C	C	C	C	C
solcap_snp_sl_5283	T	T	T	T	T	T	T	T	T	T	T	T	T	T	T	T	T	T	T	T	T	T	T	T	Y	T	T	T	T	T	T	T	T	T	T	T	T	Y	T	T	T	T	T	T	T	T	T	T	T
solcap_snp_sl_5280	T	T	T	T	T	T	T	T	T	T	T	T	T	T	T	T	T	T	T	T	T	T	T	T	T	T	T	T	T	T	T	T	T	T	T	T	T	T	T	T	T	T	T	T	T	T	T	T	T
solcap_snp_sl_5277	A	A	A	A	A	A	A	A	A	A	A	A	A	A	A	A	A	A	A	A	A	A	A	A	A	A	A	A	A	A	A	A	A	A	A	A	A	A	A	A	A	A	A	A	A	A	A	A	A
solcap_snp_sl_5276	C	C	C	C	C	C	C	C	C	C	C	C	C	C	C	C	C	C	C	C	C	C	C	C	C	C	C	C	C	C	C	C	C	C	C	C	C	C	C	C	C	C	C	C	C	C	C	C	C
solcap_snp_sl_30399	A	A	A	A	A	A	A	A	A	A	A	A	A	A	A	A	A	A	A	A	A	A	A	A	A	A	A	A	A	A	A	A	A	A	A	A	A	A	A	A	A	A	A	A	A	A	A	A	A
solcap_snp_sl_51535	A	A	A	A	A	A	A	A	A	A	A	A	A	A	A	A	A	A	A	A	A	A	A	A	A	A	A	A	A	A	A	A	A	A	A	A	A	A	A	A	A	A	A	A	A	A	A	A	A
solcap_snp_sl_5270	G	G	G	G	G	G	G	G	G	G	G	G	G	G	G	G	G	G	G	G	G	G	G	G	G	G	G	G	G	G	G	G	G	G	G	G	G	G	G	G	G	G	G	G	G	G	G	G	G
solcap_snp_sl_5269	C	C	C	C	C	C	C	C	C	C	C	C	C	C	C	C	C	C	C	C	C	C	C	C	C	C	C	C	C	C	C	C	C	C	C	C	C	C	C	C	C	C	C	C	C	C	C	C	C
solcap_snp_sl_5268	A	A	A	A	A	A	A	A	A	A	A	A	A	A	A	A	A	A	A	A	A	A	A	A	W	A	A	A	A	A	A	A	A	A	A	A	A	W	A	A	A	A	A	A	A	A	A	A	A
solcap_snp_sl_13842	C	C	C	C	C	C	C	C	C	C	C	C	C	C	C	C	C	C	C	C	C	C	C	C	C	C	C	C	C	C	C	C	C	C	C	Y	C	C	C	C	C	Y	C	C	C	C	C	C	Y
solcap_snp_sl_51532	A	A	A	A	A	A	A	A	A	A	A	A	A	A	A	A	A	A	A	A	A	A	A	A	A	A	A	A	A	A	A	A	A	A	A	A	A	A	A	A	A	A	A	A	A	A	A	A	A
solcap_snp_sl_51531	G	G	G	G	G	G	G	G	G	G	G	G	G	G	G	G	G	G	G	G	G	G	G	G	G	G	G	G	G	G	G	G	G	G	G	G	G	G	G	G	G	G	G	G	G	G	G	G	G
solcap_snp_sl_5266	C	C	C	S	G	C	C	G	G	C	C	C	G	C	G	C	S	C	C	G	S	G	G	G	G	G	C	C	G	S	G	S	G	S	S	S	G	G	S	S	G	S	G	C	S	S	G	G	S
solcap_snp_sl_5263	G	G	G	G	G	G	G	G	G	G	G	G	G	G	G	G	G	G	G	G	G	G	G	G	G	G	G	G	G	G	G	G	G	G	G	G	G	G	G	G	G	G	G	G	G	G	G	G	G
solcap_snp_sl_5262	A	A	A	A	A	A	A	A	A	A	A	A	A	A	A	A	A	A	A	A	A	A	A	A	A	A	A	A	A	A	A	A	A	A	A	A	A	A	A	A	A	A	A	A	A	A	A	A	A
SL10028_121	A	A	A	A	A	A	A	A	A	A	A	A	A	A	A	A	A	A	A	A	A	A	A	A	A	A	A	A	A	A	A	A	A	A	A	A	A	A	A	A	A	A	A	A	A	A	A	A	A
solcap_snp_sl_5261	G	G	G	G	G	G	G	G	G	G	G	G	G	G	G	G	G	G	G	G	G	G	G	G	G	G	G	G	G	G	G	G	G	G	G	G	G	G	G	G	G	G	G	G	G	G	G	G	G
solcap_snp_sl_5260	A	A	A	A	A	A	A	A	A	A	A	A	A	A	A	A	A	A	A	A	A	A	A	A	W	A	A	A	A	A	A	A	A	A	A	A	A	W	A	A	A	A	A	A	A	A	A	A	A
solcap_snp_sl_5257	G	G	G	G	G	G	G	G	G	G	G	G	G	G	G	G	G	G	G	G	G	G	G	G	G	G	G	G	G	G	G	G	G	G	G	G	G	G	G	G	G	G	G	G	G	G	G	G	G
solcap_snp_sl_5256	A	A	A	A	A	A	A	A	A	A	A	A	A	A	A	A	A	A	A	A	A	A	A	A	W	A	A	A	A	A	A	A	A	A	A	A	A	W	A	A	A	A	A	A	A	A	A	A	A
solcap_snp_sl_5251	C	C	C	C	C	C	C	C	C	C	C	C	C	C	C	C	C	C	C	C	C	C	C	C	C	C	C	C	C	C	C	C	C	C	C	C	C	C	C	C	C	C	C	C	C	C	C	C	C
solcap_snp_sl_1393	T	T	T	T	T	T	T	T	T	T	T	T	T	T	T	T	T	T	T	T	T	T	T	T	Y	T	T	T	T	T	T	T	T	T	T	T	T	Y	T	T	T	T	T	T	T	T	T	T	T
solcap_snp_sl_26935	C	C	C	C	C	C	C	C	C	C	C	C	C	C	C	C	C	C	C	C	C	C	C	C	C	C	C	C	C	C	C	C	C	C	C	C	C	C	C	C	C	C	C	C	C	C	C	C	C
solcap_snp_sl_1391	T	T	T	T	T	T	T	T	T	T	T	T	T	T	T	T	T	T	T	T	T	T	T	T	K	T	T	T	T	T	T	T	T	T	T	T	T	K	T	T	T	T	T	T	T	T	T	T	T
solcap_snp_sl_12647	C	C	C	Y	T	C	C	T	T	C	C	C	T	C	T	C	Y	C	C	T	Y	T	T	failed	C	T	C	C	T	Y	T	C	T	Y	Y	C	T	Y	Y	Y	Y	C	T	C	Y	Y	Y	C	C
solcap_snp_sl_1390	G	G	G	G	G	G	G	G	G	G	G	G	G	G	G	G	G	G	G	G	G	G	G	G	R	G	G	G	G	G	G	G	G	G	G	G	G	R	G	G	G	G	G	G	G	G	G	G	G
solcap_snp_sl_1389	A	A	A	A	A	A	A	A	A	A	A	A	A	A	A	A	A	A	A	A	A	A	A	A	A	A	A	A	A	A	A	A	A	A	A	A	A	A	A	A	A	A	A	A	A	A	A	A	A
solcap_snp_sl_1388	T	T	T	T	T	T	T	T	T	T	T	T	T	T	T	T	T	T	T	T	T	T	T	T	Y	T	T	T	T	T	T	T	T	T	T	T	T	Y	T	T	T	T	T	T	T	T	T	T	T
solcap_snp_sl_26928	A	A	A	A	A	A	A	A	A	A	A	A	A	A	A	A	A	A	A	A	A	A	A	A	M	A	A	A	A	A	A	A	A	A	A	A	A	M	A	A	A	A	A	A	A	A	A	A	A
solcap_snp_sl_26923	G	G	G	G	G	G	G	G	G	G	G	G	G	G	G	G	G	G	G	G	G	G	G	G	K	G	G	G	G	G	G	G	G	G	G	G	G	K	G	G	G	G	G	G	G	G	G	G	G
solcap_snp_sl_30473	G	G	G	G	G	G	G	G	G	G	G	G	G	G	G	G	G	G	G	G	G	G	G	G	K	G	G	G	G	G	G	G	G	G	G	G	G	K	G	G	G	G	G	G	G	G	G	G	G
solcap_snp_sl_30479	G	G	G	G	G	G	G	G	G	G	G	G	G	G	G	G	G	G	G	G	G	G	G	G	G	G	G	G	G	G	G	G	G	G	G	G	G	G	G	G	G	G	G	G	G	G	G	G	G
solcap_snp_sl_30482	failed	A	A	A	A	A	A	A	A	A	A	A	A	A	A	A	A	A	A	A	A	A	A	A	M	A	A	A	A	A	A	A	A	A	A	A	A	M	A	A	A	A	A	A	A	A	A	A	A
solcap_snp_sl_56955	A	A	A	A	A	A	A	A	A	A	A	A	A	A	A	A	A	A	A	A	A	A	A	A	R	A	A	A	A	A	A	A	A	A	A	A	A	R	A	A	A	A	A	A	A	A	A	A	A
solcap_snp_sl_32196	A	A	A	A	A	A	A	A	A	A	A	A	A	A	A	A	A	A	A	A	A	A	A	A	M	A	A	A	A	A	A	A	A	A	A	A	A	M	A	A	A	A	A	A	A	A	A	A	A
solcap_snp_sl_944	C	C	C	C	C	C	C	C	C	C	C	C	C	C	C	C	C	C	C	C	C	C	C	C	Y	C	C	C	C	C	C	C	C	C	C	C	C	Y	C	C	C	C	C	C	C	C	C	C	C
solcap_snp_sl_945	C	C	C	C	C	C	C	C	C	C	C	C	C	C	C	C	C	C	C	C	C	C	C	C	C	C	C	C	C	C	C	C	C	C	C	C	C	C	C	C	C	C	C	C	C	C	C	C	C
solcap_snp_sl_2037	C	C	C	C	C	C	C	C	C	C	C	C	C	C	C	C	C	C	C	C	C	C	C	C	Y	C	C	C	C	C	C	C	C	C	C	C	C	Y	C	C	C	C	C	C	C	C	C	C	C
solcap_snp_sl_2036	G	G	G	G	G	G	G	G	G	G	G	G	G	G	G	G	G	G	G	G	G	G	G	G	G	G	G	G	G	G	G	G	G	G	G	G	G	G	G	G	G	G	G	G	G	G	G	G	G
solcap_snp_sl_2031	G	G	G	G	G	G	G	G	G	G	G	G	G	G	G	G	G	G	G	G	G	G	G	G	G	G	G	G	G	G	G	G	G	G	G	G	G	G	G	G	G	G	G	G	G	G	G	G	G
solcap_snp_sl_2030	G	G	G	G	G	G	G	G	G	G	G	G	G	G	G	G	G	G	G	G	G	G	G	G	G	G	G	G	G	G	G	G	G	failed	G	G	G	G	G	G	G	failed	G	failed	G	G	G	G	G
solcap_snp_sl_2029	T	T	T	T	T	T	T	T	T	T	T	T	T	T	T	T	T	T	T	T	T	T	T	T	T	T	T	T	T	T	T	T	T	T	T	T	T	T	T	T	T	T	T	T	T	T	T	T	T
solcap_snp_sl_2028	G	G	G	G	G	G	G	G	G	G	G	G	G	G	G	G	G	G	G	G	G	G	G	G	G	G	G	G	G	G	G	G	G	G	G	G	G	G	G	G	G	G	G	G	G	G	G	G	G
solcap_snp_sl_2027	G	G	G	G	G	G	G	G	G	G	G	G	G	G	G	G	G	G	G	G	G	G	G	G	failed	G	G	G	G	G	G	G	G	G	G	G	G	failed	G	G	G	G	G	G	G	G	G	G	G
solcap_snp_sl_11795	C	C	C	C	C	C	C	C	C	C	C	C	C	C	C	C	C	C	C	C	C	C	C	C	C	C	C	C	C	C	C	C	C	C	C	C	C	C	C	C	C	C	C	C	C	C	C	C	C
solcap_snp_sl_11797	C	C	C	C	C	C	C	C	C	C	C	C	C	C	C	C	C	C	C	C	C	C	C	C	C	C	C	C	C	C	C	C	C	C	C	C	C	C	C	C	C	C	C	C	C	C	C	C	C
solcap_snp_sl_11798	C	C	C	C	C	C	C	C	C	C	C	C	C	C	C	C	C	C	C	C	C	C	C	C	C	C	C	C	C	C	C	C	C	C	C	C	C	C	C	C	C	C	C	C	C	C	C	C	C
solcap_snp_sl_70009	T	T	T	T	T	T	T	T	T	T	T	T	T	T	T	T	T	T	T	T	T	T	T	T	T	T	T	T	T	T	T	T	T	T	T	T	T	T	T	T	T	T	T	T	T	T	T	T	T
solcap_snp_sl_36890	T	T	T	T	T	T	T	T	T	T	T	T	T	T	T	T	T	T	T	T	T	T	T	T	Y	T	T	T	T	T	T	T	T	T	T	T	T	Y	T	T	T	T	T	T	T	T	T	T	T
solcap_snp_sl_11802	G	G	G	G	G	G	G	G	G	G	G	G	G	G	G	G	G	G	G	G	G	G	G	G	G	G	G	G	G	G	G	G	G	G	G	G	G	G	G	G	G	G	G	G	G	G	G	G	G
solcap_snp_sl_11803	G	G	G	G	G	G	G	G	G	G	G	G	G	G	G	G	G	G	G	G	G	G	G	G	G	G	G	G	G	G	G	G	G	G	G	G	G	G	G	G	G	G	G	G	G	G	G	G	G
solcap_snp_sl_11804	G	G	G	G	G	G	G	G	G	G	G	G	G	G	G	G	G	G	G	G	G	G	G	G	K	G	G	G	G	G	G	G	G	G	G	G	G	K	G	G	G	G	G	G	G	G	G	G	G
solcap_snp_sl_11805	G	G	G	G	G	G	G	G	G	G	G	G	G	G	G	G	G	G	G	G	G	G	G	G	S	G	G	G	G	G	G	G	G	G	G	G	G	S	G	G	G	G	G	G	G	G	G	G	G
solcap_snp_sl_70010	C	C	C	C	C	C	C	C	C	C	C	C	C	C	C	C	C	C	C	C	C	C	C	C	C	C	C	C	C	C	C	C	C	C	C	C	C	C	C	C	C	C	C	C	C	C	C	C	C
solcap_snp_sl_25966	G	G	G	G	G	G	G	G	G	G	G	G	G	G	G	G	G	G	G	G	G	G	G	G	G	G	G	G	G	G	G	G	G	G	G	G	G	G	G	G	G	G	G	G	G	G	G	G	G
solcap_snp_sl_25974	C	C	C	C	C	C	C	C	C	C	C	C	C	C	C	C	C	C	C	C	C	C	C	C	Y	C	C	C	C	C	C	C	C	C	C	C	C	Y	C	C	C	C	C	C	C	C	C	C	C
CL016852-0345	A	A	A	A	A	A	A	A	A	A	A	A	A	A	A	A	A	A	A	A	A	A	A	A	A	A	A	A	A	A	A	A	A	A	A	A	A	A	A	A	A	A	A	A	A	A	A	A	A
CL016852-0159	A	A	A	A	A	A	A	A	A	A	A	A	A	A	A	A	A	A	A	A	A	A	A	A	A	A	A	A	A	A	A	A	A	A	A	A	A	A	A	A	A	A	A	A	A	A	A	A	A
solcap_snp_sl_25987	G	G	G	G	G	G	G	G	G	G	G	G	G	G	G	G	G	G	G	G	G	G	G	G	R	G	G	G	G	G	G	G	G	G	G	G	G	R	G	G	G	G	G	G	G	G	G	G	G
SGN-U600984_snp332	G	G	G	G	G	G	G	G	G	G	G	G	G	G	G	G	G	G	G	G	G	G	G	G	G	G	G	G	G	G	G	G	G	G	G	G	G	G	G	G	G	G	G	G	G	G	G	G	G
solcap_snp_sl_26013	T	T	T	T	T	T	T	T	T	T	T	T	T	T	T	T	T	T	T	T	T	T	T	T	T	T	T	T	T	T	T	T	T	T	T	T	T	T	T	T	T	T	T	T	T	T	T	T	T
solcap_snp_sl_26022	T	T	T	T	T	T	T	T	T	T	T	T	T	T	T	T	T	T	T	T	T	T	T	T	Y	T	T	T	T	T	T	T	T	T	T	T	T	Y	T	T	T	T	T	T	T	T	T	T	T
Le006654_46	G	G	G	G	G	G	G	G	G	G	G	G	G	G	G	G	G	G	G	G	G	G	G	G	K	G	G	G	G	G	G	G	G	G	G	G	G	K	G	G	G	G	G	G	G	G	G	G	G
solcap_snp_sl_26050	C	C	C	C	C	C	C	C	C	C	C	C	C	C	C	C	C	C	C	C	C	C	C	C	C	C	C	C	C	C	C	C	C	C	C	C	C	C	C	C	C	C	C	C	C	C	C	C	C
solcap_snp_sl_26072	C	C	C	C	C	C	C	C	C	C	C	C	C	C	C	C	C	C	C	C	C	C	C	C	Y	C	C	C	C	C	C	Y	C	C	C	C	C	Y	C	C	C	Y	C	C	C	C	C	Y	Y
solcap_snp_sl_26094	G	G	G	G	G	G	G	G	G	G	G	G	G	G	G	G	G	G	G	G	G	G	G	G	G	G	G	G	G	G	G	G	G	G	G	G	G	G	G	G	G	G	G	G	G	G	G	G	G
solcap_snp_sl_26109	C	C	C	C	C	C	C	C	C	C	C	C	C	C	C	C	C	C	C	C	C	C	C	C	C	C	C	C	C	C	C	C	C	C	C	C	C	C	C	C	C	C	C	C	C	C	C	C	C
solcap_snp_sl_26124	C	C	C	C	C	C	C	C	C	C	C	C	C	C	C	C	C	C	C	C	C	C	C	C	C	C	C	C	C	C	C	C	C	C	C	C	C	C	C	C	C	C	C	C	C	C	C	C	C
solcap_snp_sl_12372	G	G	G	G	G	G	G	G	G	G	G	G	G	G	G	G	G	G	G	G	K	K	T	T	K	K	G	G	K	K	K	K	K	G	K	K	K	G	K	K	K	T	K	G	G	K	K	K	T
solcap_snp_sl_38456	A	A	A	A	A	A	A	A	A	A	A	A	A	A	A	A	A	A	A	A	A	A	A	A	A	A	A	A	A	A	A	A	A	A	A	A	A	A	A	A	A	A	A	A	A	A	A	A	A
solcap_snp_sl_26129	C	C	C	C	C	C	C	C	C	C	C	C	C	C	C	C	C	C	C	C	C	C	C	C	C	C	C	C	C	C	C	C	C	C	C	C	C	C	C	C	C	C	C	C	C	C	C	C	C
solcap_snp_sl_26132	C	C	C	C	C	C	C	C	C	C	C	C	C	C	C	C	C	C	C	C	C	C	C	C	C	C	C	C	C	C	C	C	C	C	C	C	C	C	C	C	C	C	C	C	C	C	C	C	C
solcap_snp_sl_38457	G	G	G	G	G	G	G	G	G	G	G	G	G	G	G	G	G	G	G	G	G	G	G	G	G	G	G	G	G	G	G	G	G	G	G	G	G	G	G	G	G	G	G	G	G	G	G	G	G
solcap_snp_sl_26134	G	G	G	G	G	G	G	G	G	G	G	G	G	G	G	G	G	G	G	G	G	G	G	G	G	G	G	G	G	G	G	G	G	G	G	G	G	G	G	G	G	G	G	G	G	G	G	G	G
solcap_snp_sl_26136	T	T	T	T	T	T	T	T	T	T	T	T	T	T	T	T	T	T	T	T	T	T	T	T	T	T	T	T	T	T	T	T	T	T	T	T	T	T	T	T	T	T	T	T	T	T	T	T	T
CL016266-0283	A	A	A	A	A	A	A	A	A	A	A	A	A	A	A	A	A	A	A	A	A	A	A	A	A	A	A	A	A	A	A	A	A	A	A	A	A	A	A	A	A	A	A	A	A	A	A	A	A
solcap_snp_sl_26147	T	T	T	T	T	T	T	T	T	T	T	T	T	T	T	T	T	T	T	T	T	T	T	T	T	T	T	T	T	T	T	T	T	T	T	T	T	T	T	T	T	T	T	T	T	T	T	T	T
solcap_snp_sl_26158	A	A	A	A	A	A	A	A	A	A	A	A	A	A	A	A	A	A	A	A	A	A	A	A	A	A	A	A	A	A	A	A	A	A	A	A	A	A	A	A	A	A	A	A	A	A	A	A	A
solcap_snp_sl_26168	C	C	C	C	C	C	C	C	C	C	C	C	C	C	C	C	C	C	C	C	C	C	C	C	C	C	C	C	C	C	C	C	C	C	C	C	C	C	C	C	C	C	C	C	C	C	C	C	C
solcap_snp_sl_36312	C	C	C	C	C	C	C	C	C	C	C	C	C	C	C	C	C	C	C	C	C	C	C	C	C	C	C	C	C	C	C	C	C	C	C	C	C	C	C	C	C	C	C	C	C	C	C	C	C
solcap_snp_sl_22259	G	G	A	A	A	A	G	A	A	G	G	A	A	G	A	A	G	A	G	A	A	A	A	A	A	A	A	A	A	A	A	A	A	A	A	A	A	A	A	A	A	A	A	G	A	A	A	A	A
solcap_snp_sl_67542	G	G	A	A	A	A	G	A	A	G	G	A	A	G	A	A	G	A	G	A	A	A	A	A	A	A	A	A	A	A	A	A	A	A	A	A	A	A	A	A	A	A	A	G	A	A	A	A	A
solcap_snp_sl_36484	A	A	A	A	A	A	A	A	A	A	A	A	A	A	A	A	A	A	A	A	A	A	A	A	A	A	A	A	A	A	A	A	A	A	A	A	A	A	A	A	A	A	A	A	A	A	A	A	A
solcap_snp_sl_36448	G	G	G	G	G	G	G	G	G	G	G	G	G	G	G	G	G	G	G	G	G	G	G	G	G	G	G	G	G	G	G	G	G	G	G	G	G	G	G	G	G	G	G	G	G	G	G	G	G
solcap_snp_sl_15709	C	C	C	Y	C	C	C	C	C	C	C	C	T	C	C	C	C	C	C	C	Y	Y	C	C	C	C	Y	T	Y	Y	C	Y	C	T	C	C	C	C	failed	C	C	C	C	C	C	Y	C	C	C
solcap_snp_sl_15707	G	G	G	S	G	G	G	G	G	G	G	G	C	G	G	G	G	G	G	G	S	S	G	G	G	G	S	C	S	S	G	S	G	C	G	G	G	G	S	G	G	G	G	G	G	S	G	G	G
solcap_snp_sl_36443	A	A	A	R	A	A	A	A	A	A	A	A	G	A	A	A	A	A	A	A	R	R	A	A	A	A	R	G	R	R	A	R	A	G	A	A	A	A	R	A	A	G	A	A	A	R	A	A	G
solcap_snp_sl_15706	T	T	T	Y	T	T	T	T	T	T	T	T	C	T	T	T	T	T	T	T	Y	Y	T	T	T	T	Y	C	Y	Y	T	Y	T	C	T	T	T	T	Y	T	T	C	T	T	T	Y	T	T	C
solcap_snp_sl_36441	A	A	A	A	A	A	A	A	A	A	A	A	A	A	A	A	A	A	A	A	A	A	A	A	A	A	A	A	A	A	A	A	A	A	A	A	A	A	A	A	A	A	A	A	A	A	A	A	A
Le009381_51	A	A	A	A	A	A	A	A	A	A	A	A	A	A	A	A	A	A	A	A	A	A	A	A	A	A	A	A	A	A	A	A	A	A	A	A	A	A	A	A	A	A	A	A	A	A	A	A	A
solcap_snp_sl_67520	T	T	T	T	T	T	T	T	T	T	T	T	T	T	T	T	T	T	T	T	T	T	T	T	T	T	T	T	T	T	T	T	T	T	T	T	T	T	T	T	T	T	T	T	T	T	T	T	T
solcap_snp_sl_36420	A	A	A	A	A	A	A	A	A	A	A	A	A	A	A	A	A	A	A	A	A	A	A	A	A	A	A	A	A	A	A	A	A	A	A	A	A	A	A	A	A	A	A	A	A	A	A	A	A
solcap_snp_sl_36419	T	T	T	T	T	T	T	T	T	T	T	T	T	T	T	T	T	T	T	T	T	T	T	T	T	T	T	T	T	T	T	T	T	T	T	T	T	T	T	T	T	T	T	T	T	T	T	T	T
solcap_snp_sl_36400	C	C	C	C	C	C	C	C	C	C	C	C	C	C	C	C	C	C	C	C	C	C	C	C	C	C	C	C	C	C	C	C	C	C	C	C	C	C	C	C	C	C	C	C	C	C	C	C	C
solcap_snp_sl_15701	C	C	C	Y	C	C	C	C	C	C	C	C	T	C	C	C	C	C	C	C	Y	C	C	C	C	C	Y	T	Y	Y	C	Y	C	Y	C	Y	C	C	Y	C	C	C	C	C	Y	Y	C	C	C
solcap_snp_sl_15699	A	A	A	R	A	A	A	A	A	A	A	A	G	A	A	A	A	A	A	A	R	A	A	A	A	A	R	G	R	R	A	R	A	R	A	A	A	A	R	A	A	A	A	A	R	R	A	A	A
solcap_snp_sl_15698	A	A	A	R	A	A	A	A	A	A	A	A	G	A	A	A	A	A	A	A	R	A	A	A	A	A	R	G	R	R	A	R	A	R	A	A	A	A	R	A	A	A	A	A	R	R	A	A	A
solcap_snp_sl_15697	T	T	T	Y	T	T	T	T	T	T	T	T	C	T	T	T	T	T	T	T	Y	T	T	T	T	T	Y	C	Y	Y	T	Y	T	Y	T	T	T	T	Y	T	T	T	T	T	Y	Y	T	T	T
solcap_snp_sl_15696	A	A	A	W	A	A	A	A	A	A	A	A	T	A	A	A	A	A	A	A	W	A	A	A	A	A	W	failed	W	W	A	W	A	W	A	A	A	A	W	A	A	A	A	A	W	W	A	A	A
solcap_snp_sl_15693	G	G	G	R	G	G	G	G	G	G	G	G	A	G	G	G	G	G	G	G	R	G	G	G	G	G	R	A	R	R	G	R	G	R	G	G	G	G	R	G	G	G	G	G	R	R	G	G	G
solcap_snp_sl_15690	C	C	C	Y	C	C	C	C	C	C	C	C	T	C	C	C	C	C	C	C	Y	C	C	C	C	C	Y	T	Y	Y	C	Y	C	Y	C	C	C	C	Y	C	C	C	C	C	Y	Y	C	C	C
solcap_snp_sl_15689	A	A	A	A	G	A	A	A	A	A	A	A	A	A	A	A	A	A	A	A	A	R	G	G	A	R	A	A	A	A	R	A	R	R	A	R	A	A	A	A	R	G	R	A	A	A	R	G	G
solcap_snp_sl_15688	G	G	G	G	A	G	G	G	G	G	G	G	G	G	G	G	G	G	G	G	G	R	A	A	G	R	G	G	G	G	R	G	R	R	G	R	G	G	G	G	R	A	R	G	G	G	R	A	A
CL016047-0333	C	C	C	C	C	C	C	C	C	C	C	C	C	C	C	C	C	C	C	C	C	C	C	C	C	C	C	C	C	C	C	C	C	C	C	C	C	C	C	C	C	C	C	C	C	C	C	C	C
CL016047-0183_solcap_snp_sl_36384	C	C	C	C	C	C	C	C	C	C	C	C	C	C	C	C	C	C	C	C	C	C	C	C	C	C	C	C	C	C	C	C	C	C	C	C	C	C	C	C	C	C	C	C	C	C	C	C	C
solcap_snp_sl_21955	C	C	C	Y	T	C	C	C	C	C	C	C	T	C	C	C	C	C	C	C	Y	Y	T	T	C	Y	Y	failed	Y	Y	Y	Y	Y	T	C	Y	C	C	Y	C	Y	T	Y	C	Y	Y	Y	T	T
SGN-U563909_snp1344_solcap_snp_sl_67508	T	T	T	T	T	T	T	T	T	T	T	T	T	T	T	T	T	T	T	T	T	T	T	T	T	T	T	T	T	T	T	T	T	T	T	T	T	T	T	T	T	T	T	T	T	T	T	T	T
solcap_snp_sl_36373	T	T	T	T	T	T	T	T	T	T	T	T	T	T	T	T	T	T	T	T	T	T	T	T	T	T	T	T	T	T	T	T	T	T	T	T	T	T	T	T	T	T	T	T	T	T	T	T	T
SGN-U571208_snp268	A	A	A	A	A	A	A	A	A	A	A	A	A	A	A	A	A	A	A	A	A	A	A	A	A	A	A	A	A	A	A	A	A	A	A	A	A	A	A	A	A	A	A	A	A	A	A	A	A
CL017839-0338	A	A	A	A	A	A	A	A	A	A	A	A	A	A	A	A	A	A	A	A	A	A	A	A	A	A	A	A	A	A	A	A	A	A	A	A	A	A	A	A	A	A	A	A	A	A	A	A	A
solcap_snp_sl_8384	A	A	A	A	A	A	A	A	A	A	A	A	A	A	A	A	A	A	A	A	A	A	A	failed	A	A	A	A	A	A	A	A	A	A	A	A	A	A	A	A	A	G	A	A	A	A	A	A	G
solcap_snp_sl_8386	A	A	A	A	A	A	A	A	A	A	A	A	A	A	A	A	A	A	A	A	A	A	A	failed	A	A	A	A	A	A	A	A	A	A	A	A	A	A	A	A	A	G	A	A	A	A	A	A	G
solcap_snp_sl_20322	A	A	A	A	A	A	A	A	A	A	A	A	A	A	A	A	A	A	A	A	A	A	A	A	A	A	A	A	A	A	A	A	A	A	A	A	A	A	A	A	A	A	A	A	A	A	A	A	A
solcap_snp_sl_8388	T	T	T	T	T	T	T	T	T	T	T	T	T	T	T	T	T	T	T	T	T	T	T	K	T	T	T	T	T	T	T	T	T	T	T	T	T	T	T	T	T	G	T	T	T	T	T	T	G
solcap_snp_sl_8389	C	C	C	C	C	C	C	C	C	C	C	C	C	C	C	C	C	C	C	C	C	C	C	Y	C	C	C	C	C	C	C	C	C	C	C	C	C	C	C	C	C	T	C	C	C	C	C	C	T
solcap_snp_sl_8393	T	T	T	T	T	T	T	T	T	T	T	T	T	T	T	T	T	T	T	T	T	T	T	failed	T	T	T	T	T	T	T	T	T	T	T	T	T	T	T	T	T	G	T	T	T	T	T	T	G
solcap_snp_sl_33199	C	C	C	C	C	C	C	C	C	C	C	C	C	C	C	C	C	C	C	C	C	C	C	C	C	C	C	C	C	C	C	C	C	C	C	C	C	C	C	C	C	C	C	C	C	C	C	C	C
solcap_snp_sl_8397	C	C	C	C	C	C	C	C	C	C	C	C	C	C	C	C	C	C	C	C	C	C	C	failed	C	C	C	C	C	C	C	C	C	C	C	C	C	C	C	C	C	T	C	C	C	C	C	C	T
solcap_snp_sl_33205	G	G	G	G	G	G	G	G	G	G	G	G	G	G	G	G	G	G	G	G	G	G	G	G	G	G	G	G	G	G	G	G	G	G	G	G	G	G	G	G	G	G	G	G	G	G	G	G	G
solcap_snp_sl_20325	T	T	T	T	T	T	T	T	T	T	T	T	T	T	T	T	T	T	T	T	T	T	T	failed	T	T	T	T	T	T	T	T	T	T	T	T	T	T	T	T	T	C	T	T	T	T	T	T	C
solcap_snp_sl_8402	G	G	G	G	G	G	G	G	G	G	G	G	G	G	G	G	G	G	G	G	G	G	G	failed	G	G	G	G	G	G	G	G	G	G	G	G	G	G	G	G	G	A	G	G	G	G	G	G	A
Le017925_27_solcap_snp_sl_33223	G	G	G	G	G	G	G	G	G	G	G	G	G	G	G	G	G	G	G	G	G	G	G	G	G	G	G	G	G	G	G	G	G	G	G	G	G	G	G	G	G	G	G	G	G	G	G	G	G
solcap_snp_sl_8405	A	A	A	A	A	A	A	A	A	A	A	A	A	A	A	A	A	A	A	A	A	A	A	failed	A	A	A	A	A	A	A	A	A	A	A	A	A	A	A	A	A	G	A	A	A	A	A	A	G
solcap_snp_sl_8408	T	T	T	T	T	T	T	T	T	T	T	T	T	T	T	T	T	T	T	T	T	T	T	W	T	T	T	T	T	T	T	T	T	T	T	T	T	T	T	T	T	A	T	T	T	T	T	T	A
solcap_snp_sl_8409	C	C	C	C	C	C	C	C	C	C	C	C	C	C	C	C	C	C	C	C	C	C	C	Y	C	C	C	C	C	C	C	C	C	C	C	C	C	C	C	C	C	T	C	C	C	C	C	C	T
SGN-U578164_snp2086	T	T	T	T	T	T	T	T	T	T	T	T	T	T	T	T	T	T	T	T	T	T	T	T	T	T	T	T	T	T	T	T	T	T	T	T	T	T	T	T	T	T	T	T	T	T	T	T	T
solcap_snp_sl_8421	A	A	A	A	A	A	A	A	A	A	A	A	A	A	A	A	A	A	A	A	A	A	A	A	A	A	A	A	A	A	A	A	A	A	A	A	A	A	A	A	A	A	A	A	A	A	A	A	A
solcap_snp_sl_33242	G	G	G	G	G	G	G	G	G	G	G	G	G	G	G	G	G	G	G	G	G	G	G	G	G	G	G	G	G	G	G	G	G	G	G	G	G	G	G	G	G	G	G	G	G	G	G	G	G
solcap_snp_sl_8423	A	A	A	A	A	A	A	A	A	A	A	A	A	A	A	A	A	A	A	A	A	A	A	A	A	A	A	A	A	A	A	A	A	A	A	A	A	A	A	A	A	A	A	A	A	A	A	A	A
solcap_snp_sl_8426	T	T	T	T	T	T	T	T	T	T	T	T	T	T	T	T	T	T	T	T	T	T	T	T	T	T	T	T	T	T	T	T	T	T	T	T	T	T	T	T	T	T	T	T	T	T	T	T	T
solcap_snp_sl_20340	G	G	G	S	G	G	G	G	G	G	G	G	C	G	G	G	S	G	G	G	S	S	C	C	G	S	C	C	S	S	G	S	S	C	G	S	G	G	S	G	S	C	S	G	S	S	S	C	C
solcap_snp_sl_20344	C	C	C	C	C	C	C	C	C	C	C	C	C	C	C	C	C	C	C	C	C	Y	T	T	C	Y	C	C	C	C	C	C	C	Y	C	Y	C	C	C	Y	Y	T	Y	C	C	C	Y	T	T
solcap_snp_sl_33255	G	G	G	G	G	G	G	G	G	G	G	G	G	G	G	G	G	G	G	G	G	G	G	G	G	G	G	G	G	G	G	G	G	G	G	G	G	G	G	G	G	G	G	G	G	G	G	G	G
solcap_snp_sl_24721	A	A	G	R	G	A	A	G	G	A	A	G	A	A	G	G	A	A	A	G	R	R	A	A	R	R	A	A	R	A	G	A	R	A	G	R	R	R	R	A	R	A	R	A	R	R	A	A	A
solcap_snp_sl_14946	C	C	C	C	C	C	C	C	C	C	C	C	C	C	C	C	C	C	C	C	C	C	C	C	C	C	C	C	C	C	C	C	C	C	C	C	C	C	C	C	C	C	C	C	C	C	C	C	C
solcap_snp_sl_20358	T	T	T	T	T	T	T	T	T	T	T	T	T	T	T	T	T	T	T	T	T	T	T	T	T	T	T	T	T	T	T	T	T	T	T	T	T	T	T	T	T	T	T	T	T	T	T	T	T
solcap_snp_sl_20361	T	T	T	T	T	T	T	T	T	T	T	T	T	T	T	T	T	T	T	T	T	T	T	T	T	T	T	T	T	T	T	T	T	T	T	T	T	T	T	T	T	T	T	T	T	T	T	T	T
solcap_snp_sl_8439	A	A	A	A	A	A	A	A	A	A	A	A	A	A	A	A	A	A	A	A	A	A	A	A	A	M	A	A	A	A	A	A	A	A	A	A	A	A	A	A	A	A	A	A	A	A	A	M	A
solcap_snp_sl_8441	G	G	G	G	G	G	G	G	G	G	G	G	G	G	G	G	G	G	G	G	G	G	G	G	G	R	G	G	G	G	G	G	G	G	G	G	G	G	G	G	G	G	G	G	G	G	G	R	G
solcap_snp_sl_33302	C	C	C	C	C	C	C	C	C	C	C	C	C	C	C	C	C	C	C	C	C	C	C	C	C	C	C	C	C	C	C	C	C	C	C	C	C	C	C	C	C	C	C	C	C	C	C	Y	C
CL017477-0069	A	A	A	A	A	A	A	A	A	A	A	A	A	A	A	A	A	A	A	A	A	A	A	A	A	A	A	A	A	A	A	A	A	A	A	A	A	A	A	A	A	A	A	A	A	A	A	A	A
CL017477-0450	G	G	G	G	G	G	G	G	G	G	G	G	G	G	G	G	G	G	G	G	G	G	G	G	G	G	G	G	G	G	G	G	G	G	G	G	G	G	G	G	G	G	G	G	G	G	G	G	G
Le005019_205	T	T	T	T	T	T	T	T	T	T	T	T	T	T	T	T	T	T	T	T	T	T	T	T	T	T	T	T	T	T	T	T	T	T	T	T	T	T	T	T	T	T	T	T	T	T	T	Y	T
CL017603-0474	A	A	A	A	A	A	A	A	A	A	A	A	A	A	A	A	A	A	A	A	A	A	A	A	A	A	A	A	A	A	A	A	A	A	A	A	A	A	A	A	A	A	A	A	A	A	A	A	A
CL016491-0436_solcap_snp_sl_33330	T	T	T	T	T	T	T	T	T	T	T	T	T	T	T	T	T	T	T	T	T	T	T	T	T	T	T	T	T	T	T	T	T	T	T	T	T	T	T	T	T	T	T	T	T	T	T	Y	T
solcap_snp_sl_33334	T	T	T	T	T	T	T	T	T	T	T	T	T	T	T	T	T	T	T	T	T	T	T	T	T	T	T	T	T	T	T	T	T	T	T	T	T	T	T	T	T	T	T	T	T	T	T	K	T
CL015942-0231_solcap_snp_sl_33337	G	G	G	G	G	G	G	G	G	G	G	G	G	G	G	G	G	G	G	G	G	G	G	G	G	G	G	G	G	G	G	G	G	G	G	G	G	G	G	G	G	G	G	G	G	G	G	R	G
solcap_snp_sl_14951	T	T	T	Y	C	T	T	C	C	T	T	T	T	C	C	T	T	T	T	C	Y	C	Y	T	Y	Y	Y	T	Y	Y	C	Y	Y	Y	Y	Y	Y	Y	T	T	T	T	C	T	Y	C	Y	Y	T
solcap_snp_sl_59581	G	G	G	G	G	G	G	G	G	G	G	G	G	G	G	G	G	G	G	G	G	G	G	G	G	G	G	G	G	G	G	G	G	G	G	G	G	G	G	G	G	G	G	G	G	G	G	R	G
CL015849-0329	T	T	T	T	T	T	T	T	T	T	T	T	T	T	T	T	T	T	T	T	T	T	T	T	T	T	T	T	T	T	T	T	T	T	T	T	T	T	T	T	T	T	T	T	T	T	T	T	T
solcap_snp_sl_33416	A	A	A	A	A	A	A	A	A	A	A	A	A	A	A	A	A	A	A	A	A	A	A	A	A	A	A	A	A	A	A	A	A	A	A	A	A	A	A	A	A	A	A	A	A	A	A	A	A
CL016463-0326_solcap_snp_sl_33432	A	A	A	A	A	A	A	A	A	A	A	A	A	A	A	A	A	A	A	A	A	A	A	A	A	A	A	A	A	A	A	A	A	A	A	A	A	A	A	A	A	A	A	A	A	A	A	A	A
solcap_snp_sl_8464	A	A	C	M	C	A	A	C	C	A	A	C	C	C	C	C	M	A	A	C	M	C	M	A	C	M	C	A	C	C	C	C	C	M	C	C	M	C	M	A	M	C	C	M	M	C	C	C	C
solcap_snp_sl_33459	T	T	T	T	T	T	T	T	T	T	T	T	T	T	T	T	T	T	T	T	T	T	T	T	T	T	T	T	T	T	T	T	T	T	T	T	T	T	T	T	T	T	T	T	T	T	T	T	T
SGN-U315881_T1698_snp147	C	C	C	C	C	C	C	C	C	C	C	C	C	C	C	C	C	C	C	C	C	C	C	C	C	C	C	C	C	C	C	C	C	C	C	C	C	C	C	C	C	C	C	C	C	C	C	C	C
solcap_snp_sl_33469	A	A	A	A	A	A	A	A	A	A	A	A	A	A	A	A	A	A	A	A	A	A	A	A	A	A	A	A	A	A	A	A	A	A	A	A	A	A	A	A	A	A	A	A	A	A	A	A	A
Le001778_68_solcap_snp_sl_33474	C	C	C	C	C	C	C	C	C	C	C	C	C	C	C	C	C	C	C	C	C	C	C	C	C	C	C	C	C	C	C	C	C	C	C	C	C	C	C	C	C	T	C	C	C	C	C	C	T
solcap_snp_sl_59619	A	A	A	A	A	A	A	A	A	A	A	A	A	A	A	A	A	A	A	A	A	A	A	A	A	A	A	A	A	A	A	A	A	A	A	A	A	A	A	A	A	C	A	A	A	A	A	A	C
SGN-U574493_snp71	C	C	C	C	C	C	C	C	C	C	C	C	C	C	C	C	C	C	C	C	C	C	C	C	C	C	C	C	C	C	C	C	C	C	C	C	C	C	C	C	C	C	C	C	C	C	C	C	C
CL017156-0308_solcap_snp_sl_33519	T	T	T	T	T	T	T	T	T	T	T	T	T	T	T	T	T	T	T	T	T	T	T	T	T	T	T	T	T	T	T	T	T	T	T	T	T	T	T	T	T	T	T	T	T	T	T	T	T
solcap_snp_sl_33524	C	C	C	C	C	C	C	C	C	C	C	C	C	C	C	C	C	C	C	C	C	C	C	C	C	C	C	C	C	C	C	C	C	C	C	C	C	C	C	C	C	C	C	C	C	C	C	C	C
CL015430-0435	T	T	T	T	T	T	T	T	T	T	T	T	T	T	T	T	T	T	T	T	T	T	T	T	T	T	T	T	T	T	T	T	T	T	T	T	T	T	T	T	T	T	T	T	T	T	T	T	T
SGN-U586107_snp378_solcap_snp_sl_33547	C	C	C	C	C	C	C	C	C	C	C	C	C	C	C	C	C	C	C	C	C	C	C	C	C	C	C	C	C	C	C	C	C	C	C	C	C	C	C	C	C	C	C	C	C	C	C	C	C
SL20141_109_CL009129-0540_solcap_snp_sl_33558	G	G	G	G	G	G	G	G	G	G	G	G	G	G	G	G	G	G	G	G	G	G	G	G	G	G	G	G	G	G	G	G	G	G	G	G	G	G	G	G	G	G	G	G	G	G	G	G	G
solcap_snp_sl_33579	A	A	A	A	A	A	A	A	A	A	A	A	A	A	A	A	A	A	A	A	A	A	R	A	A	A	A	A	A	A	A	A	A	A	A	A	A	A	A	A	A	A	A	A	A	A	A	A	A
solcap_snp_sl_8505	T	T	T	T	T	T	T	T	T	T	T	T	C	T	T	T	Y	T	T	T	T	Y	Y	C	Y	Y	Y	T	C	T	T	Y	Y	T	Y	Y	T	Y	Y	T	Y	T	Y	Y	T	Y	Y	T	T
solcap_snp_sl_8510	G	G	G	G	G	G	G	G	G	G	G	G	A	G	G	G	R	G	G	G	G	R	G	A	R	R	R	G	A	G	G	R	R	G	R	R	R	R	R	G	R	G	R	R	G	R	R	G	G
solcap_snp_sl_59647	C	C	A	M	A	C	C	A	A	C	C	A	A	A	A	A	M	C	C	A	M	A	M	A	A	A	A	C	A	A	A	M	A	M	A	M	M	A	M	C	M	A	M	M	C	M	M	C	A
solcap_snp_sl_33595	A	A	A	A	A	A	A	A	A	A	A	A	A	A	A	A	A	A	A	A	A	A	R	A	A	A	A	A	A	A	A	A	A	A	A	A	A	A	A	A	A	G	A	A	A	A	A	A	G
SGN-U568794_snp106	C	C	C	C	C	C	C	C	C	C	C	C	C	C	C	C	C	C	C	C	C	C	C	C	C	C	C	C	C	C	C	C	C	C	C	C	C	C	C	C	C	A	C	C	C	C	C	C	A
solcap_snp_sl_8512	T	T	C	Y	C	T	T	C	C	T	T	C	C	C	C	C	Y	T	T	C	Y	C	T	C	C	C	C	T	C	C	C	Y	C	Y	C	Y	Y	C	Y	T	Y	T	Y	Y	T	Y	Y	T	T
solcap_snp_sl_8514	A	A	G	R	G	A	A	G	G	A	A	G	G	G	G	G	R	A	A	G	R	G	R	G	G	G	G	A	G	G	G	R	G	R	G	R	R	G	R	A	R	G	R	R	A	R	R	A	G
solcap_snp_sl_33611	T	T	T	T	T	T	T	T	T	T	T	T	T	T	T	T	T	T	T	T	T	T	Y	T	T	T	T	T	T	T	T	T	T	T	T	T	T	T	T	T	T	C	T	T	T	T	T	T	C
CL017581-0470_solcap_snp_sl_33624	G	G	G	G	G	G	G	G	G	G	G	G	G	G	G	G	G	G	G	G	G	G	G	G	G	G	G	G	G	G	G	G	G	G	G	G	G	G	G	G	G	A	G	G	G	G	G	G	A
solcap_snp_sl_33633	C	C	C	C	C	C	C	C	C	C	C	C	C	C	C	C	C	C	C	C	C	C	C	C	C	C	C	C	C	C	C	C	C	C	C	C	C	C	C	C	C	T	C	C	C	C	C	C	T
solcap_snp_sl_8524	G	G	A	R	A	G	G	A	A	G	G	A	A	A	A	A	R	G	G	A	R	A	R	A	A	A	A	G	A	A	A	G	A	R	A	R	R	A	R	G	R	A	R	R	G	R	A	R	A
solcap_snp_sl_33636	G	G	G	G	G	G	G	G	G	G	G	G	G	G	G	G	G	G	G	G	G	G	R	G	G	G	G	G	G	G	G	G	G	G	G	G	G	G	G	G	G	A	G	G	G	G	G	G	A
CL005464-0159	T	T	T	T	T	T	T	T	T	T	T	T	T	T	T	T	T	T	T	T	T	T	T	T	T	T	T	T	T	T	T	T	T	T	T	T	T	T	T	T	T	T	T	T	T	T	T	T	T
CL005464-0069	T	T	T	T	T	T	T	T	T	T	T	T	T	T	T	T	T	T	T	T	T	T	T	T	T	T	T	T	T	T	T	T	T	T	T	T	T	T	T	T	T	T	T	T	T	T	T	T	T
solcap_snp_sl_10569	A	A	A	A	A	A	A	A	A	A	A	A	A	A	A	A	A	A	A	A	A	A	A	A	R	R	A	A	A	A	A	A	A	A	R	R	R	R	R	A	R	A	R	A	A	A	G	A	A
solcap_snp_sl_36037	C	C	C	C	C	C	C	C	C	C	C	C	C	C	C	C	C	C	C	C	C	C	Y	C	C	C	C	C	C	C	C	C	C	C	C	C	C	C	C	C	C	T	C	C	C	C	C	C	T
solcap_snp_sl_10567	A	A	A	A	A	A	A	A	A	A	A	A	A	A	A	A	A	A	A	A	R	A	R	A	R	R	A	G	A	A	A	A	A	A	R	R	R	R	R	A	R	G	R	A	R	A	G	A	G
solcap_snp_sl_10564	C	C	C	C	C	C	C	C	C	C	C	C	C	C	C	C	C	C	C	C	Y	C	Y	C	C	Y	C	T	C	C	C	C	C	C	C	C	Y	C	C	C	C	T	Y	C	Y	C	Y	C	T
CL015660-0224_solcap_snp_sl_36017	G	G	G	G	G	G	G	G	G	G	G	G	G	G	G	G	G	G	G	G	G	G	G	G	G	G	G	G	G	G	G	G	G	G	G	G	G	G	G	G	G	A	G	G	G	G	G	G	A
solcap_snp_sl_10563	C	C	C	S	C	C	C	C	C	C	C	C	C	C	C	C	C	C	C	C	C	C	S	C	C	C	C	C	C	C	C	S	C	S	C	C	C	C	S	S	C	G	S	C	S	C	C	C	G
solcap_snp_sl_10557	A	A	A	M	A	A	A	A	A	A	A	A	A	A	A	A	A	A	A	A	A	A	M	A	A	A	A	A	A	A	A	A	A	M	A	A	A	A	M	M	A	C	M	A	M	A	A	A	C
solcap_snp_sl_36004	T	T	T	T	T	T	T	T	T	T	T	T	T	T	T	T	T	T	T	T	T	T	K	T	T	T	T	T	T	T	T	T	T	T	T	T	T	T	T	T	T	G	T	T	T	T	T	T	G
solcap_snp_sl_10552	T	T	G	G	G	T	T	G	G	T	T	G	T	G	G	G	T	T	T	G	K	K	T	T	T	K	K	K	T	K	G	T	K	G	K	T	T	T	K	K	T	G	K	T	K	T	K	K	G
solcap_snp_sl_66052	C	C	C	C	C	C	C	C	C	C	C	C	C	C	C	C	C	C	C	C	C	C	C	C	C	C	C	C	C	C	C	C	C	C	C	C	C	C	C	C	C	T	C	C	C	C	C	C	T
CL009018-1241	G	G	G	G	G	G	G	G	G	G	G	G	G	G	G	G	G	G	G	G	G	G	G	G	G	G	G	G	G	G	G	G	G	G	G	G	G	G	G	G	G	A	G	G	G	G	G	G	A
2875_4_240_2875_4b_77_b	C	C	C	C	C	C	C	C	C	C	C	C	C	C	C	C	C	C	C	C	C	C	C	C	C	C	C	C	C	C	C	C	C	C	C	C	C	C	C	C	C	A	C	C	C	C	C	C	A
2875_4_300	C	C	C	C	C	C	C	C	C	C	C	C	C	C	C	C	C	C	C	C	C	C	C	C	C	C	C	C	C	C	C	C	C	C	C	C	C	C	C	C	C	A	C	C	C	C	C	C	A
2875_4b_205_b_2875_4_368	T	T	T	T	T	T	T	T	T	T	T	T	T	T	T	T	T	T	T	T	T	T	T	T	T	T	T	T	T	T	T	T	T	T	T	T	T	T	T	T	T	A	T	T	T	T	T	T	A
2875_4_1050	T	T	T	T	T	T	T	T	T	T	T	T	T	T	T	T	T	T	T	T	T	T	T	T	T	T	T	T	T	T	T	T	T	T	T	T	T	T	T	T	T	A	T	T	T	T	T	T	A
CL003810-0351	T	T	T	T	T	T	T	T	T	T	T	T	T	T	T	T	T	T	T	T	T	T	T	T	T	T	T	T	T	T	T	T	T	T	T	T	T	T	T	T	T	C	T	T	T	T	T	T	C
SL10649_1116_solcap_snp_sl_35973	T	T	T	T	T	T	T	T	T	T	T	T	T	T	T	T	T	T	T	T	T	T	T	T	T	T	T	T	T	T	T	T	T	T	T	T	T	T	T	T	T	C	T	T	T	T	T	T	C
solcap_snp_sl_10534	T	T	T	Y	T	C	T	T	T	T	T	T	C	T	T	T	Y	C	T	T	Y	C	C	C	C	C	C	Y	C	Y	Y	C	Y	Y	Y	C	Y	C	C	Y	C	T	C	C	C	C	Y	C	T
solcap_snp_sl_10533	A	A	A	R	A	G	A	A	A	A	A	A	G	A	A	A	R	G	A	A	R	G	G	G	G	G	G	R	G	R	R	G	R	R	R	G	R	G	G	R	G	G	G	G	G	G	R	G	G
solcap_snp_sl_10531	C	C	C	Y	C	T	C	C	C	C	C	C	T	C	C	C	Y	T	C	C	Y	T	T	T	T	T	T	Y	T	Y	Y	T	Y	Y	Y	T	Y	T	T	Y	T	T	T	T	T	T	Y	T	T
solcap_snp_sl_10530	G	G	G	R	G	A	G	G	G	G	G	G	A	G	G	G	R	A	G	G	R	A	A	A	A	A	A	R	A	R	R	A	R	R	R	A	R	A	A	R	A	A	A	A	A	A	R	A	A
solcap_snp_sl_35968	C	C	C	C	C	C	C	C	C	C	C	C	C	C	C	C	C	C	C	C	C	C	C	C	C	C	C	C	C	C	C	C	C	C	C	C	C	C	C	C	C	T	C	C	C	C	C	C	T
solcap_snp_sl_35967	C	C	C	C	C	C	C	C	C	C	C	C	C	C	C	C	C	C	C	C	C	C	C	C	C	C	C	C	C	C	C	C	C	C	C	C	C	C	C	C	C	A	C	C	C	C	C	C	A
solcap_snp_sl_35964	A	A	A	A	A	A	A	A	A	A	A	A	A	A	A	A	A	A	A	A	A	A	A	A	A	A	A	A	A	A	A	A	A	A	A	A	A	A	A	A	A	G	A	A	A	A	A	A	G
solcap_snp_sl_35963	G	G	G	G	G	G	G	G	G	G	G	G	G	G	G	G	G	G	G	G	G	G	G	G	G	G	G	G	G	G	G	G	G	G	G	G	G	G	G	G	G	A	G	G	G	G	G	G	A
solcap_snp_sl_10528	T	T	T	Y	T	C	T	T	T	T	T	T	C	T	T	T	Y	C	T	T	Y	C	C	C	C	C	C	Y	C	Y	Y	C	Y	Y	Y	C	Y	C	C	Y	C	C	C	C	C	C	Y	C	C
solcap_snp_sl_35956	G	G	G	G	G	G	G	G	G	G	G	G	G	G	G	G	G	G	G	G	G	G	G	G	G	G	G	G	G	G	G	G	G	G	G	G	G	G	G	G	G	A	G	G	G	G	G	G	A
solcap_snp_sl_35955	T	T	T	T	T	T	T	T	T	T	T	T	T	T	T	T	T	T	T	T	T	T	T	T	T	T	T	T	T	T	T	T	T	T	T	T	T	T	T	T	T	C	T	T	T	T	T	T	C
solcap_snp_sl_35954	A	A	A	A	A	A	A	A	A	A	A	A	A	A	A	A	A	A	A	A	A	A	A	A	A	A	A	A	A	A	A	A	A	A	A	A	A	A	A	A	A	G	A	A	A	A	A	A	G
solcap_snp_sl_10516	C	C	C	C	C	T	C	C	C	C	C	C	C	C	C	C	C	T	C	C	C	C	T	C	Y	C	C	C	C	C	C	Y	C	Y	C	Y	C	Y	Y	C	T	C	C	Y	C	C	Y	T	C
solcap_snp_sl_35948	G	G	G	G	G	G	G	G	G	G	G	G	G	G	G	G	G	G	G	G	G	G	G	G	G	G	G	G	G	G	G	G	G	G	G	G	G	G	G	G	G	T	G	G	G	G	G	G	T
CL009186-0301_solcap_snp_sl_35943	C	C	C	C	C	C	C	C	C	C	C	C	C	C	C	C	C	C	C	C	C	C	C	C	C	C	C	C	C	C	C	C	C	C	C	C	C	C	C	C	C	T	C	C	C	C	C	C	T
solcap_snp_sl_35911	failed	failed	failed	failed	failed	failed	failed	failed	failed	failed	failed	failed	failed	failed	failed	failed	failed	failed	failed	failed	failed	failed	failed	failed	failed	failed	failed	failed	failed	failed	failed	failed	failed	failed	failed	failed	failed	failed	failed	failed	failed	failed	failed	failed	failed	failed	failed	failed	failed
solcap_snp_sl_35868	G	G	G	G	G	G	G	G	G	G	G	G	G	G	G	G	G	G	G	G	G	G	G	G	G	G	G	G	G	G	G	G	G	G	G	G	G	G	G	G	G	K	G	G	G	G	G	G	K
SGN-U565295_snp33269	G	G	G	G	G	G	G	G	G	G	G	G	G	G	G	G	G	G	G	G	G	G	G	G	G	G	G	G	G	G	G	G	G	G	G	G	G	G	G	G	G	G	G	G	G	G	G	G	G
SGN-U581789_snp1077_solcap_snp_sl_35846	C	C	C	C	C	C	C	C	C	C	C	C	C	C	C	C	C	C	C	C	C	C	C	C	C	C	C	C	C	C	C	C	C	C	C	C	C	C	C	C	C	Y	C	C	C	C	C	C	Y
CL016381-0173_solcap_snp_sl_35845	A	A	A	A	A	A	A	A	A	A	A	A	A	A	A	A	A	A	A	A	A	A	A	A	A	A	A	A	A	A	A	A	A	A	A	A	A	A	A	A	A	R	A	A	A	A	A	A	R
solcap_snp_sl_35844	G	G	G	G	G	G	G	G	G	G	G	G	G	G	G	G	G	G	G	G	G	G	G	G	G	G	G	G	G	G	G	G	G	G	G	G	G	G	G	G	G	R	G	G	G	G	G	G	R
solcap_snp_sl_21744	C	C	C	Y	C	T	C	C	C	C	C	C	T	C	C	C	Y	T	C	C	Y	Y	T	T	T	Y	Y	Y	T	T	C	T	Y	Y	T	T	C	T	T	Y	T	Y	Y	T	T	T	Y	T	Y
solcap_snp_sl_35821	C	C	C	C	C	C	C	C	C	C	C	C	C	C	C	C	C	C	C	C	C	C	C	C	C	C	C	C	C	C	C	C	C	C	C	C	C	C	C	C	C	C	C	C	C	C	C	C	C
CL016680-0509	A	A	A	A	A	A	A	A	A	A	A	A	A	A	A	A	A	A	A	A	A	A	A	A	A	A	A	A	A	A	A	A	A	A	A	A	A	A	A	A	A	A	A	A	A	A	A	A	A
solcap_snp_sl_25485	A	A	A	A	A	A	A	A	A	A	A	A	A	A	A	A	A	A	A	A	A	A	A	A	A	A	A	A	A	A	A	A	A	A	A	A	A	A	A	A	A	A	A	A	A	A	A	A	A
solcap_snp_sl_25482	T	T	T	T	T	T	T	T	T	T	T	T	T	T	T	T	T	T	T	T	T	T	T	T	T	T	T	T	T	T	T	T	T	T	T	T	T	T	T	T	T	T	T	T	T	T	T	T	T
solcap_snp_sl_25481	G	G	G	G	G	G	G	G	G	G	G	G	G	G	G	G	G	G	G	G	G	G	G	G	G	G	G	G	G	G	G	G	G	G	G	G	G	G	G	G	G	G	G	G	G	G	G	G	G
solcap_snp_sl_25477	A	A	A	A	A	A	A	A	A	A	A	A	A	A	A	A	A	A	A	A	A	A	A	A	A	A	A	A	A	A	A	A	A	A	A	A	A	A	A	A	A	A	A	A	A	A	A	A	A
solcap_snp_sl_25475	T	T	T	T	T	T	T	T	T	T	T	T	T	T	T	T	T	T	T	T	T	T	T	T	T	T	T	T	T	T	T	T	T	T	T	T	T	T	T	T	T	T	T	T	T	T	T	T	T
solcap_snp_sl_25473	C	C	C	C	C	C	C	C	C	C	C	C	C	C	C	C	C	C	C	C	C	C	C	C	C	C	C	C	C	C	C	C	C	C	C	C	C	C	C	C	C	C	C	C	C	C	C	C	C
solcap_snp_sl_25472	G	G	G	G	G	G	G	G	G	G	G	G	G	G	G	G	G	G	G	G	G	G	G	G	G	G	G	G	G	G	G	G	G	G	G	G	G	G	G	G	G	G	G	G	G	G	G	G	G
solcap_snp_sl_25470	C	C	C	C	C	C	C	C	C	C	C	C	C	C	C	C	C	C	C	C	C	C	C	C	C	C	C	C	C	C	C	C	C	C	C	C	C	C	C	C	C	C	C	C	C	C	C	C	C
solcap_snp_sl_35802	C	C	C	C	C	C	C	C	C	C	C	C	C	C	C	C	C	C	C	C	C	C	C	C	C	C	C	C	C	C	C	C	C	C	C	C	C	C	C	C	C	C	C	C	C	C	C	C	C
solcap_snp_sl_35798	C	C	C	C	C	C	C	C	C	C	C	C	C	C	C	C	C	C	C	C	C	C	C	C	C	C	C	C	C	C	C	C	C	C	C	C	C	C	C	C	C	C	C	C	C	C	C	C	C
solcap_snp_sl_25469	T	T	T	T	T	T	T	T	T	T	T	T	T	T	T	T	T	T	T	T	T	T	T	T	T	T	T	T	T	T	T	T	T	T	T	T	T	T	T	T	T	T	T	T	T	T	T	T	T
solcap_snp_sl_35797	C	C	C	C	C	C	C	C	C	C	C	C	C	C	C	C	C	C	C	C	C	C	C	C	C	C	C	C	C	C	C	C	C	C	C	C	C	C	C	C	C	C	C	C	C	C	C	C	C
solcap_snp_sl_25463	A	A	A	A	A	A	A	A	A	A	A	A	A	A	A	A	A	A	A	A	A	A	A	A	A	A	A	A	A	A	A	A	A	A	A	A	A	A	A	A	A	A	A	A	A	A	A	A	A
solcap_snp_sl_25460	A	A	A	A	A	A	A	A	A	A	A	A	A	A	A	A	A	A	A	A	A	A	A	A	A	A	A	A	A	A	A	A	A	A	A	A	A	A	A	A	A	A	A	A	A	A	A	A	A
solcap_snp_sl_25454	C	C	C	C	C	C	C	C	C	C	C	C	C	C	C	C	C	C	C	C	C	C	C	C	C	C	C	C	C	C	C	C	C	C	C	C	C	C	C	C	C	C	C	C	C	C	C	C	C
solcap_snp_sl_25453	T	T	T	T	T	T	T	T	T	T	T	T	T	T	T	T	T	T	T	T	T	T	T	T	T	T	T	T	T	T	T	T	T	T	T	T	T	T	T	T	T	T	T	T	T	T	T	T	T
solcap_snp_sl_35791	T	T	T	T	T	T	T	T	T	T	T	T	T	T	T	T	T	T	T	T	T	T	T	T	T	T	T	T	T	T	T	T	T	T	T	T	T	T	T	T	T	T	T	T	T	T	T	T	T
solcap_snp_sl_25449	C	C	C	C	C	C	C	C	C	C	C	C	C	C	C	C	C	C	C	C	C	C	C	C	C	C	C	C	C	C	C	C	C	C	C	C	C	C	C	C	C	C	C	C	C	C	C	C	C
solcap_snp_sl_25448	G	G	G	G	G	G	G	G	G	G	G	G	G	G	G	G	G	G	G	G	G	G	G	G	G	G	G	G	G	G	G	G	G	G	G	G	G	G	G	G	G	G	G	G	G	G	G	G	G
solcap_snp_sl_25444	T	T	T	T	T	T	T	T	T	T	T	T	T	T	T	T	T	T	T	T	T	T	T	T	T	T	T	T	T	T	T	T	T	T	T	T	T	T	T	T	T	T	T	T	T	T	T	T	T
solcap_snp_sl_25443	A	A	A	A	A	A	A	A	A	A	A	A	A	A	A	A	A	A	A	A	A	A	A	A	A	A	A	A	A	A	A	A	A	A	A	A	A	A	A	A	A	A	A	A	A	A	A	A	A
solcap_snp_sl_25442	A	A	A	A	A	A	A	A	A	A	A	A	A	A	A	A	A	A	A	A	A	A	A	A	A	A	A	A	A	A	A	A	A	A	A	A	A	A	A	A	A	A	A	A	A	A	A	A	A
solcap_snp_sl_25441	G	G	G	G	G	G	G	G	G	G	G	G	G	G	G	G	G	G	G	G	G	G	G	G	G	G	G	G	G	G	G	G	G	G	G	G	G	G	G	G	G	G	G	G	G	G	G	G	G
solcap_snp_sl_25440	C	C	C	C	C	C	C	C	C	C	C	C	C	C	C	C	C	C	C	C	C	C	C	C	C	C	C	C	C	C	C	C	C	C	C	C	C	C	C	C	C	C	C	C	C	C	C	C	C
solcap_snp_sl_25439	G	G	G	G	G	G	G	G	G	G	G	G	G	G	G	G	G	G	G	G	G	G	G	G	G	G	G	G	G	G	G	G	G	G	G	G	G	G	G	G	G	G	G	G	G	G	G	G	G
solcap_snp_sl_25438	C	C	C	C	C	C	C	C	C	C	C	C	C	C	C	C	C	C	C	C	C	C	C	C	C	C	C	C	C	C	C	C	C	C	C	C	C	C	C	C	C	C	C	C	C	C	C	C	C
solcap_snp_sl_35789	A	A	A	A	A	A	A	A	A	A	A	A	A	A	A	A	A	A	A	A	A	A	A	A	A	A	A	A	A	A	A	A	A	A	A	A	A	A	A	A	A	A	A	A	A	A	A	A	A
solcap_snp_sl_25433	T	T	T	T	T	T	T	T	T	T	T	T	T	T	T	T	T	T	T	T	T	T	T	T	T	T	T	T	T	T	T	T	T	T	T	T	T	T	T	T	T	T	T	T	T	T	T	T	T
solcap_snp_sl_35787	T	T	T	T	T	T	T	T	T	T	T	T	T	T	T	T	T	T	T	T	T	T	T	T	T	T	T	T	T	T	T	T	T	T	T	T	T	T	T	T	T	T	T	T	T	T	T	T	T
solcap_snp_sl_25432	G	G	G	G	G	G	G	G	G	G	G	G	G	G	G	G	G	G	G	G	G	G	G	G	G	G	G	G	G	G	G	G	G	G	G	G	G	G	G	G	G	G	G	G	G	G	G	G	G
solcap_snp_sl_25431	C	C	C	C	C	C	C	C	C	C	C	C	C	C	C	C	C	C	C	C	C	C	C	C	C	C	C	C	C	C	C	C	C	C	C	C	C	C	C	C	C	C	C	C	C	C	C	C	C
solcap_snp_sl_35784	G	G	G	G	G	G	G	G	G	G	G	G	G	G	G	G	G	G	G	G	G	G	G	G	G	G	G	G	G	G	G	G	G	G	G	G	G	G	G	G	G	G	G	G	G	G	G	G	G
solcap_snp_sl_25429	T	T	T	T	T	T	T	T	T	T	T	T	T	T	T	T	T	T	T	T	T	T	T	T	T	T	T	T	T	T	T	T	T	T	T	T	T	T	T	T	T	T	T	T	T	T	T	T	T
solcap_snp_sl_25428	T	T	T	T	T	T	T	T	T	T	T	T	T	T	T	T	T	T	T	T	T	T	T	T	T	T	T	T	T	T	T	T	T	T	T	T	T	T	T	T	T	T	T	T	T	T	T	T	T
solcap_snp_sl_35780	C	C	C	C	C	C	C	C	C	C	C	C	C	C	C	C	C	C	C	C	C	C	C	C	C	C	C	C	C	C	C	C	C	C	C	C	C	C	C	C	C	C	C	C	C	C	C	C	C
solcap_snp_sl_35779	C	C	C	C	C	C	C	C	C	C	C	C	C	C	C	C	C	C	C	C	C	C	C	C	C	C	C	C	C	C	C	C	C	C	C	C	C	C	C	C	C	C	C	C	C	C	C	C	C
solcap_snp_sl_35778	T	T	T	T	T	T	T	T	T	T	T	T	T	T	T	T	T	T	T	T	T	T	T	T	T	T	T	T	T	T	T	T	T	T	T	T	T	T	T	T	T	T	T	T	T	T	T	T	T
solcap_snp_sl_35777	C	C	C	C	C	C	C	C	C	C	C	C	C	C	C	C	C	C	C	C	C	C	C	C	C	C	C	C	C	C	C	C	C	C	C	C	C	C	C	C	C	C	C	C	C	C	C	C	C
SL10923_448	T	T	T	T	T	T	T	T	T	T	T	T	T	T	T	T	T	T	T	T	T	T	T	T	T	T	T	T	T	T	T	T	T	T	T	T	T	T	T	T	T	T	T	T	T	T	T	T	T
solcap_snp_sl_35776	C	C	C	C	C	C	C	C	C	C	C	C	C	C	C	C	C	C	C	C	C	C	C	C	C	C	C	C	C	C	C	C	C	C	C	C	C	C	C	C	C	C	C	C	C	C	C	C	C
solcap_snp_sl_35774	G	G	G	G	G	G	G	G	G	G	G	G	G	G	G	G	G	G	G	G	G	G	G	G	G	G	G	G	G	G	G	G	G	G	G	G	G	G	G	G	G	G	G	G	G	G	G	G	G
solcap_snp_sl_25427	A	A	A	A	A	A	A	A	A	A	A	A	A	A	A	A	A	A	A	A	A	A	A	A	A	A	A	A	A	A	A	A	A	A	A	A	A	A	A	A	A	A	A	A	A	A	A	A	A
solcap_snp_sl_25422	C	C	C	C	C	C	C	C	C	C	C	C	C	C	C	C	C	C	C	C	C	C	C	C	C	C	C	C	C	C	C	C	C	C	C	C	C	C	C	C	C	C	C	C	C	C	C	C	C
solcap_snp_sl_25421	G	G	G	G	G	G	G	G	G	G	G	G	G	G	G	G	G	G	G	G	G	G	G	G	G	G	G	G	G	G	G	G	G	G	G	G	G	G	G	G	G	G	G	G	G	G	G	G	G
solcap_snp_sl_65977	G	G	G	G	G	G	G	G	G	G	G	G	G	G	G	G	G	G	G	G	G	G	G	G	G	G	G	G	G	G	G	G	G	G	G	G	G	G	G	G	G	G	G	G	G	G	G	G	G
solcap_snp_sl_65976	G	G	G	G	G	G	G	G	G	G	G	G	G	G	G	G	G	G	G	G	G	G	G	G	G	G	G	G	G	G	G	G	G	G	G	G	G	G	G	G	G	G	G	G	G	G	G	G	G
solcap_snp_sl_35771	C	C	C	C	C	C	C	C	C	C	C	C	C	C	C	C	C	C	C	C	C	C	C	C	C	C	C	C	C	C	C	C	C	C	C	C	C	C	C	C	C	C	C	C	C	C	C	C	C
solcap_snp_sl_65975	A	A	A	A	A	A	A	A	A	A	A	A	A	A	A	A	A	A	A	A	A	A	A	A	A	A	A	A	A	A	A	A	A	A	A	A	A	A	A	A	A	A	A	A	A	A	A	A	A
solcap_snp_sl_25420	G	G	G	G	G	G	G	G	G	G	G	G	G	G	G	G	G	G	G	G	G	G	G	G	G	G	G	G	G	G	G	G	G	G	G	G	G	G	G	G	G	G	G	G	G	G	G	G	G
solcap_snp_sl_25418	G	G	G	G	G	G	G	G	G	G	G	G	G	G	G	G	G	G	G	G	G	G	G	G	G	G	G	G	G	G	G	G	G	G	G	G	G	G	G	G	G	G	G	G	G	G	G	G	G
solcap_snp_sl_15574	T	T	T	Y	T	C	T	T	T	T	T	T	C	T	T	T	Y	C	T	T	Y	Y	T	T	Y	T	Y	Y	C	C	T	Y	Y	Y	C	Y	Y	C	C	Y	Y	T	Y	C	failed	C	Y	Y	T
solcap_snp_sl_25417	G	G	G	G	G	G	G	G	G	G	G	G	G	G	G	G	G	G	G	G	G	G	G	G	G	G	G	G	G	G	G	G	G	G	G	G	G	G	G	G	G	G	G	G	G	G	G	G	G
solcap_snp_sl_25415	A	A	A	A	A	A	A	A	A	A	A	A	A	A	A	A	A	A	A	A	A	A	A	A	A	A	A	A	A	A	A	A	A	A	A	A	A	A	A	A	A	A	A	A	A	A	A	A	A
solcap_snp_sl_35770	C	C	C	C	C	C	C	C	C	C	C	C	C	C	C	C	C	C	C	C	C	C	C	C	C	C	C	C	C	C	C	C	C	C	C	C	C	C	C	C	C	C	C	C	C	C	C	C	C
SGN-U149575_TG14_snp657	C	C	C	C	C	C	C	C	C	C	C	C	C	C	C	C	C	C	C	C	C	C	C	C	C	C	C	C	C	C	C	C	C	C	C	C	C	C	C	C	C	C	C	C	C	C	C	C	C
solcap_snp_sl_25414	C	C	C	C	C	C	C	C	C	C	C	C	C	C	C	C	C	C	C	C	C	C	C	C	C	C	C	C	C	C	C	C	C	C	C	C	C	C	C	C	C	C	C	C	C	C	C	C	C
solcap_snp_sl_35764	G	G	G	G	G	G	G	G	G	G	G	G	G	G	G	G	G	G	G	G	G	G	G	G	G	G	G	G	G	G	G	G	G	G	G	G	G	G	G	G	G	G	G	G	G	G	G	G	G
CL015861-0082	G	G	G	G	G	G	G	G	G	G	G	G	G	G	G	G	G	G	G	G	G	G	G	G	G	G	G	G	G	G	G	G	G	G	G	G	G	G	G	G	G	G	G	G	G	G	G	G	G
CL015861-0134	C	C	C	C	C	C	C	C	C	C	C	C	C	C	C	C	C	C	C	C	C	C	C	C	C	C	C	C	C	C	C	C	C	C	C	C	C	C	C	C	C	C	C	C	C	C	C	C	C
solcap_snp_sl_25409	T	T	T	T	T	T	T	T	T	T	T	T	T	T	T	T	T	T	T	T	T	T	T	T	T	T	T	T	T	T	T	T	T	T	T	T	T	T	T	T	T	T	T	T	T	T	T	T	T
solcap_snp_sl_25408	A	A	A	A	A	A	A	A	A	A	A	A	A	A	A	A	A	A	A	A	A	A	A	A	A	A	A	A	A	A	A	A	A	A	A	A	A	A	A	A	A	A	A	A	A	A	A	A	A
solcap_snp_sl_25406	A	A	A	A	A	A	A	A	A	A	A	A	A	A	A	A	A	A	A	A	A	A	A	A	A	A	A	A	A	A	A	A	A	A	A	A	A	A	A	A	A	A	A	A	A	A	A	A	A
solcap_snp_sl_25405	A	A	A	A	A	A	A	A	A	A	A	A	A	A	A	A	A	A	A	A	A	A	A	A	A	A	A	A	A	A	A	A	A	A	A	A	A	A	A	A	A	A	A	A	A	A	A	A	A
solcap_snp_sl_25403	T	T	T	T	T	T	T	T	T	T	T	T	T	T	T	T	T	T	T	T	T	T	T	T	T	T	T	T	T	T	T	T	T	T	T	T	T	T	T	T	T	T	T	T	T	T	T	T	T
solcap_snp_sl_25402	C	C	C	C	C	C	C	C	C	C	C	C	C	C	C	C	C	C	C	C	C	C	C	C	C	C	C	C	C	C	C	C	C	C	C	C	C	C	C	C	C	C	C	C	C	C	C	C	C
solcap_snp_sl_25401	G	G	G	G	G	G	G	G	G	G	G	G	G	G	G	G	G	G	G	G	G	G	G	G	G	G	G	G	G	G	G	G	G	G	G	G	G	G	G	G	G	G	G	G	G	G	G	G	G
solcap_snp_sl_35759	T	T	T	T	T	T	T	T	T	T	T	T	T	T	T	T	T	T	T	T	T	T	T	T	T	T	T	T	T	T	T	T	T	T	T	T	T	T	T	T	T	T	T	T	T	T	T	T	T
solcap_snp_sl_35758	G	G	G	G	G	G	G	G	G	G	G	G	G	G	G	G	G	G	G	G	G	G	G	G	G	G	G	G	G	G	G	G	G	G	G	G	G	G	G	G	G	G	G	G	G	G	G	G	G
SL10346_156	T	T	T	T	T	T	T	T	T	T	T	T	T	T	T	T	T	T	T	T	T	T	T	T	T	T	T	T	T	T	T	T	T	T	T	T	T	T	T	T	T	T	T	T	T	T	T	T	T
solcap_snp_sl_35757	G	G	G	G	G	G	G	G	G	G	G	G	G	G	G	G	G	G	G	G	G	G	G	G	G	G	G	G	G	G	G	G	G	G	G	G	G	G	G	G	G	G	G	G	G	G	G	G	G
SGN-U574837_snp399	C	C	C	C	C	C	C	C	C	C	C	C	C	C	C	C	C	C	C	C	C	C	C	C	C	C	C	C	C	C	C	C	C	C	C	C	C	C	C	C	C	C	C	C	C	C	C	C	C
solcap_snp_sl_35755	T	T	T	T	T	T	T	T	T	T	T	T	T	T	T	T	T	T	T	T	T	T	T	T	T	T	T	T	T	T	T	T	T	T	T	T	T	T	T	T	T	T	T	T	T	T	T	T	T
solcap_snp_sl_25398	T	T	T	T	T	T	T	T	T	T	T	T	T	T	T	T	T	T	T	T	T	T	T	T	T	T	T	T	T	T	T	T	T	T	T	T	T	T	T	T	T	T	T	T	T	T	T	T	T
solcap_snp_sl_35754	T	T	T	T	T	T	T	T	T	T	T	T	T	T	T	T	T	T	T	T	T	T	T	T	T	T	T	T	T	T	T	T	T	T	T	T	T	T	T	T	T	T	T	T	T	T	T	T	T
solcap_snp_sl_35753	T	T	T	T	T	T	T	T	T	T	T	T	T	T	T	T	T	T	T	T	T	T	T	T	T	T	T	T	T	T	T	T	T	T	T	T	T	T	T	T	T	T	T	T	T	T	T	T	T
solcap_snp_sl_35752	G	G	G	G	G	G	G	G	G	G	G	G	G	G	G	G	G	G	G	G	G	G	G	G	G	G	G	G	G	G	G	G	G	G	G	G	G	G	G	G	G	G	G	G	G	G	G	G	G
SGN-U584790_snp107	G	G	G	G	G	G	G	G	G	G	G	G	G	G	G	G	G	G	G	G	G	G	G	G	G	G	G	G	G	G	G	G	G	G	G	G	G	G	G	G	G	G	G	G	G	G	G	G	G
solcap_snp_sl_49304	T	T	T	T	T	T	T	T	T	T	T	T	T	T	T	T	T	T	T	T	T	T	T	T	T	T	T	T	T	T	T	T	T	T	T	T	T	T	T	T	T	T	T	T	T	T	T	T	T
solcap_snp_sl_23849	A	A	A	A	A	A	A	A	A	A	A	A	A	A	A	A	A	A	A	A	A	A	A	A	A	A	A	A	A	A	A	A	A	A	A	A	A	A	A	A	A	A	A	A	A	A	A	A	A
solcap_snp_sl_29517	failed	failed	failed	failed	failed	failed	failed	failed	failed	failed	failed	failed	failed	failed	failed	failed	failed	failed	failed	failed	failed	failed	failed	failed	failed	failed	failed	failed	failed	failed	failed	failed	failed	failed	failed	failed	failed	failed	failed	failed	failed	failed	failed	failed	failed	failed	failed	failed	failed
solcap_snp_sl_23850	G	G	G	R	G	G	G	G	G	G	G	G	A	G	G	G	R	G	G	G	R	A	G	A	R	G	R	R	A	R	R	R	A	R	A	R	G	R	R	R	R	G	R	R	A	A	G	G	G
solcap_snp_sl_13513	T	T	T	Y	T	T	T	T	T	T	T	T	C	T	T	T	Y	T	T	T	Y	C	T	C	Y	T	Y	Y	C	Y	Y	Y	C	Y	C	Y	T	Y	Y	Y	Y	T	Y	Y	C	C	T	T	T
solcap_snp_sl_13514	C	C	C	Y	C	C	C	C	C	C	C	C	T	C	C	C	Y	C	C	C	Y	T	C	T	Y	C	Y	Y	T	Y	Y	Y	T	Y	T	Y	C	Y	Y	Y	Y	C	Y	Y	T	T	C	C	C
solcap_snp_sl_13515	T	T	T	Y	T	T	T	T	T	T	T	T	C	T	T	T	Y	T	T	T	Y	C	T	C	Y	T	Y	Y	C	Y	Y	Y	C	Y	C	Y	T	Y	Y	Y	Y	T	Y	Y	C	C	T	T	T
solcap_snp_sl_13516	T	T	T	K	T	T	T	T	T	T	T	T	G	T	T	T	K	T	T	T	K	G	T	G	K	T	K	K	G	K	K	K	G	K	G	K	T	K	K	K	K	T	K	K	G	G	T	T	T
solcap_snp_sl_13517	G	G	G	R	G	G	G	G	G	G	G	G	A	G	G	G	R	G	G	G	R	A	G	A	R	G	R	R	A	R	R	R	A	R	A	R	G	R	R	R	R	G	R	R	A	A	G	G	G
solcap_snp_sl_13518	C	C	C	Y	C	C	C	C	C	C	C	C	T	C	C	C	Y	C	C	C	Y	T	C	T	Y	C	Y	Y	T	Y	Y	Y	T	Y	T	Y	C	Y	Y	Y	Y	C	Y	Y	T	T	C	C	C
solcap_snp_sl_13519	G	G	G	R	G	G	G	G	G	G	G	G	A	G	G	G	R	G	G	G	R	A	G	A	R	G	R	R	A	R	R	R	A	R	A	R	G	R	R	R	R	G	R	R	A	A	G	G	G
solcap_snp_sl_23851	T	T	T	W	T	T	T	T	T	T	T	T	A	T	T	T	W	T	T	T	W	A	T	A	W	T	W	W	A	W	W	W	A	W	A	W	T	W	W	W	W	T	W	W	A	A	T	T	T
solcap_snp_sl_13523	A	A	A	M	A	A	A	A	A	A	A	A	C	A	A	A	M	A	A	A	M	C	A	C	M	A	M	M	C	M	M	M	C	M	C	M	A	M	M	M	M	A	M	M	C	C	A	A	A
solcap_snp_sl_13526	T	T	T	Y	T	T	T	T	T	T	T	T	C	T	T	T	Y	T	T	T	Y	C	T	C	Y	T	C	Y	C	Y	Y	Y	C	Y	C	Y	T	Y	Y	Y	Y	T	Y	Y	C	C	T	T	T
solcap_snp_sl_13527	G	G	G	R	G	G	G	G	G	G	G	G	A	G	G	G	R	G	G	G	R	A	G	A	R	G	A	R	A	R	R	R	A	R	A	R	G	R	R	R	R	G	R	R	A	A	G	G	G
solcap_snp_sl_13528	A	A	A	M	A	A	A	A	A	A	A	A	C	A	A	A	M	A	A	A	M	C	A	C	M	A	C	M	C	M	M	M	C	M	C	M	A	M	M	M	M	A	M	M	C	C	A	A	A
solcap_snp_sl_13529	C	C	C	M	C	C	C	C	C	C	C	C	A	C	C	C	M	C	C	C	M	A	C	A	M	C	A	M	A	M	M	M	A	M	A	M	C	M	M	M	M	C	M	M	A	A	C	C	C
solcap_snp_sl_13530	G	G	G	R	G	G	G	G	G	G	G	G	A	G	G	G	R	G	G	G	R	A	G	A	R	G	A	R	A	R	R	R	A	R	A	R	G	R	R	R	R	G	R	R	A	A	G	G	G
solcap_snp_sl_13531	G	G	G	R	G	G	G	G	G	G	G	G	A	G	G	G	R	G	G	G	R	A	G	A	R	G	A	R	A	R	R	R	A	R	A	R	G	R	failed	R	R	G	R	R	A	A	G	G	G
solcap_snp_sl_13534	C	C	C	M	C	C	C	C	C	C	C	C	A	C	C	C	M	C	C	C	M	A	C	A	M	C	A	M	A	M	M	M	A	M	A	M	C	M	M	M	M	C	M	M	A	A	C	C	C
solcap_snp_sl_29520	C	C	C	Y	C	C	C	C	C	C	C	C	T	C	C	C	Y	C	C	C	Y	T	C	T	Y	C	T	Y	T	Y	Y	Y	T	Y	T	Y	C	Y	Y	Y	Y	C	Y	Y	T	T	C	C	C
solcap_snp_sl_13545	C	C	C	M	C	C	C	C	C	C	C	C	A	C	C	C	M	C	C	C	M	A	C	A	M	C	A	M	A	M	M	M	A	M	A	M	C	M	M	M	M	C	M	M	A	A	C	C	C
solcap_snp_sl_29521	A	A	A	W	A	A	A	A	A	A	A	A	T	A	A	A	W	A	A	A	W	T	A	T	W	A	T	W	T	W	W	W	T	W	T	W	A	W	failed	W	W	A	W	W	T	T	A	A	A
solcap_snp_sl_13546	A	A	A	W	A	A	A	A	A	A	A	A	T	A	A	A	W	A	A	A	W	T	A	T	W	A	T	W	T	W	W	W	T	W	T	W	A	W	W	W	W	A	W	W	T	T	A	A	A
solcap_snp_sl_29522	G	G	G	K	G	G	G	G	G	G	G	G	T	G	G	G	K	G	G	G	K	T	G	T	K	G	T	K	T	K	K	K	T	K	T	K	G	K	K	K	K	G	K	K	T	T	G	G	G
solcap_snp_sl_29523	C	C	C	M	C	C	C	C	C	C	C	C	A	C	C	C	M	C	C	C	M	A	C	A	M	C	A	M	A	M	M	M	A	M	A	M	C	M	M	M	M	C	M	M	A	A	C	C	C
solcap_snp_sl_13549	A	A	A	W	A	A	A	A	A	A	A	A	T	A	A	A	W	A	A	A	W	T	A	T	W	A	T	W	T	W	W	W	T	W	T	W	A	W	W	W	W	A	W	W	T	T	A	A	A
solcap_snp_sl_13550	G	G	G	R	G	G	G	G	G	G	G	G	A	G	G	G	R	G	G	G	R	A	G	A	R	G	A	R	A	R	R	R	A	R	A	R	G	R	R	R	R	G	R	R	A	A	G	G	G
solcap_snp_sl_13552	A	A	A	W	A	A	A	A	A	A	A	A	T	A	A	A	W	A	A	A	W	T	A	T	W	A	T	W	T	W	W	W	T	W	T	W	A	W	W	W	W	A	W	W	T	T	A	A	A
solcap_snp_sl_23856	G	G	G	R	G	G	G	G	G	G	G	G	A	G	G	G	R	G	G	G	R	A	G	A	R	G	A	R	A	R	R	R	A	R	A	R	G	R	R	R	R	G	R	R	A	A	G	G	G
solcap_snp_sl_29524	A	A	A	M	A	A	A	A	A	A	A	A	C	A	A	A	M	A	A	A	M	C	A	C	M	A	C	M	C	M	M	M	C	M	C	M	A	M	M	M	M	A	M	M	C	C	A	A	A
solcap_snp_sl_23857	A	A	A	R	A	A	A	A	A	A	A	A	G	A	A	A	R	A	A	A	R	G	A	G	R	A	G	R	G	R	R	R	G	R	G	R	A	R	R	R	R	A	R	R	G	G	A	A	A
solcap_snp_sl_13554	G	G	G	R	G	G	G	G	G	G	G	G	A	G	G	G	R	G	G	G	R	A	G	A	R	G	A	R	A	R	R	R	A	R	A	R	G	R	R	R	R	G	R	R	A	A	G	G	G
solcap_snp_sl_13555	T	T	T	Y	T	T	T	T	T	T	T	T	C	T	T	T	Y	T	T	T	Y	C	T	C	Y	T	C	Y	C	Y	Y	Y	C	Y	C	Y	T	Y	Y	Y	Y	T	Y	Y	C	C	T	T	T
solcap_snp_sl_13556	C	C	C	Y	C	C	C	C	C	C	C	C	T	C	C	C	Y	C	C	C	Y	T	C	T	Y	C	T	Y	T	Y	Y	Y	T	Y	T	Y	C	Y	Y	Y	Y	C	Y	Y	T	T	C	C	C
solcap_snp_sl_13557	T	T	T	Y	T	T	T	T	T	T	T	T	C	T	T	T	Y	T	T	T	Y	C	T	C	Y	T	C	Y	C	Y	Y	Y	C	Y	C	Y	T	Y	Y	Y	Y	T	Y	Y	C	C	T	T	T
solcap_snp_sl_13558	G	G	G	R	G	G	G	G	G	G	G	G	A	G	G	G	R	G	G	G	R	A	G	A	R	G	A	R	A	R	R	R	A	R	A	R	G	R	R	R	R	G	R	R	A	A	G	G	G
solcap_snp_sl_13559	T	T	T	Y	T	T	T	T	T	T	T	T	C	T	T	T	Y	T	T	T	Y	C	T	C	Y	T	C	Y	C	Y	Y	Y	C	Y	C	Y	T	Y	Y	Y	Y	T	Y	Y	C	C	T	T	T
solcap_snp_sl_29526	G	G	G	R	G	G	G	G	G	G	G	G	A	G	G	G	R	G	G	G	R	A	G	A	R	G	A	A	A	R	R	R	A	R	A	R	G	R	R	R	R	G	R	R	A	A	G	G	G
Le013093s_150	C	C	C	M	C	C	C	C	C	C	C	C	A	C	C	C	M	C	C	C	M	A	C	C	M	C	A	A	A	M	M	M	A	M	A	M	C	M	M	M	M	C	M	M	A	A	C	C	C
solcap_snp_sl_29527	A	A	A	R	A	A	A	A	A	A	A	A	G	A	A	A	R	A	A	A	R	G	A	A	R	A	G	G	G	R	R	R	G	R	G	R	A	R	R	R	R	A	R	R	G	G	A	A	A
solcap_snp_sl_49311	A	A	A	R	A	A	A	A	A	A	A	A	G	A	A	A	R	A	A	A	R	G	A	A	R	A	G	G	G	R	R	R	G	R	G	R	A	R	R	R	R	A	R	R	G	G	A	A	A
solcap_snp_sl_29528	G	G	G	R	G	G	G	G	G	G	G	G	A	G	G	G	R	G	G	G	R	A	G	G	R	G	A	A	A	R	R	R	A	R	A	R	G	R	R	R	R	G	R	R	A	A	G	G	G
solcap_snp_sl_13561	C	C	C	Y	C	C	C	C	C	C	C	C	T	C	C	C	Y	C	C	C	Y	T	C	C	Y	C	T	T	T	Y	Y	Y	T	Y	T	Y	C	Y	Y	Y	Y	C	Y	Y	T	T	C	C	C
solcap_snp_sl_13566	A	A	A	W	A	A	A	A	A	A	A	A	T	A	A	A	W	A	A	A	W	T	A	A	A	A	T	T	T	W	W	W	T	W	W	A	A	A	W	W	W	A	W	W	T	T	A	A	A
solcap_snp_sl_49312	A	A	A	R	A	A	A	A	A	A	A	A	G	A	A	A	R	A	A	A	R	G	A	A	A	A	G	G	G	R	R	R	G	R	R	A	A	A	R	R	R	A	R	R	G	G	A	A	A
solcap_snp_sl_13567	G	G	G	K	G	G	G	G	G	G	G	G	T	G	G	G	K	G	G	G	K	T	G	G	G	G	T	T	T	K	K	K	T	K	K	G	G	G	K	K	K	G	K	K	T	T	G	G	G
solcap_snp_sl_13568	T	T	T	K	T	T	T	T	T	T	T	T	G	T	T	T	K	T	T	T	K	G	T	T	T	T	G	G	G	K	K	K	G	K	K	T	T	T	K	K	K	T	K	K	G	G	T	T	T
solcap_snp_sl_29531	G	G	G	R	G	G	G	G	G	G	G	G	A	G	G	G	R	G	G	G	R	A	G	G	G	G	A	A	A	R	R	R	A	R	R	G	G	G	R	R	R	G	R	R	A	A	G	G	G
SL10771_467	A	A	A	R	A	A	A	A	A	A	A	A	G	A	A	A	R	A	A	A	R	G	A	A	A	A	G	G	G	R	R	R	G	R	R	A	A	A	R	R	R	A	R	R	G	G	A	A	A
solcap_snp_sl_13569	A	A	A	R	A	A	A	A	A	A	A	A	G	A	A	A	R	A	A	A	R	G	A	A	A	A	G	G	G	R	R	R	G	R	R	A	A	A	R	R	R	A	R	R	G	G	A	A	A
solcap_snp_sl_13574	C	C	C	Y	C	C	C	C	C	C	C	C	T	C	C	C	Y	C	C	C	Y	T	C	C	C	C	T	T	T	Y	Y	Y	T	Y	Y	C	C	C	Y	Y	Y	C	Y	Y	T	T	C	C	C
solcap_snp_sl_23861	T	T	T	W	T	T	T	T	T	T	T	T	A	T	T	T	W	T	T	T	W	A	T	T	T	T	A	A	A	W	W	W	A	W	W	T	T	T	W	W	W	T	W	W	A	A	T	T	T
solcap_snp_sl_13578	T	T	T	Y	T	T	T	T	T	T	T	T	C	T	T	T	Y	T	T	T	Y	C	T	T	T	T	C	C	C	Y	Y	Y	C	Y	Y	T	T	T	Y	Y	Y	T	Y	Y	C	C	T	T	T
solcap_snp_sl_13579	A	A	A	W	A	A	A	A	A	A	A	A	T	A	A	A	W	A	A	A	W	T	A	A	A	A	T	T	T	W	W	W	T	W	W	A	A	A	W	W	W	A	W	W	T	T	A	A	A
solcap_snp_sl_13580	G	G	G	S	G	G	G	G	G	G	G	G	C	G	G	G	S	G	G	G	S	C	G	G	G	G	C	C	C	S	S	S	C	S	S	G	G	G	S	S	S	G	S	S	C	C	G	G	G
solcap_snp_sl_13581	T	T	T	W	T	T	T	T	T	T	T	T	A	T	T	T	W	T	T	T	W	A	T	T	T	T	A	A	A	W	W	W	A	W	W	T	T	T	W	W	W	T	W	W	A	A	T	T	T
solcap_snp_sl_49318	A	A	A	W	A	A	A	A	A	A	A	A	T	A	A	A	W	A	A	A	W	T	A	A	A	A	T	T	T	W	W	W	T	W	W	A	A	A	W	W	W	A	W	W	T	T	A	A	A
solcap_snp_sl_13582	G	G	G	R	G	G	G	G	G	G	G	G	A	G	G	G	R	G	G	G	R	A	G	G	G	G	A	A	A	R	R	R	A	R	R	G	G	G	R	R	R	G	R	R	A	A	G	G	G
solcap_snp_sl_13584	C	C	C	Y	C	C	C	C	C	C	C	C	T	C	C	C	Y	C	C	C	Y	T	C	C	C	C	T	T	T	Y	Y	Y	T	Y	Y	C	C	C	Y	Y	Y	C	Y	Y	T	T	C	C	C
solcap_snp_sl_13586	A	A	A	W	A	A	A	A	A	A	A	A	T	A	A	A	W	A	A	A	W	T	A	A	A	A	T	T	T	W	W	W	T	W	W	A	A	A	W	W	W	A	W	W	T	T	A	A	A
S_744	T	T	T	T	T	T	T	T	T	T	T	T	T	T	T	T	T	T	T	T	T	T	T	T	T	T	T	T	T	T	T	T	T	T	T	T	T	T	T	T	T	T	T	T	T	T	T	T	T
S_427	T	T	T	W	T	T	T	T	T	T	T	T	A	T	T	T	W	T	T	T	W	A	T	T	T	T	A	A	A	W	W	W	A	W	W	T	T	T	W	W	W	T	W	W	A	A	T	T	T
solcap_snp_sl_4573	A	A	A	R	G	A	A	A	A	A	A	A	G	A	A	A	R	A	A	A	R	G	A	A	A	A	R	G	G	R	R	R	R	R	R	A	R	A	R	G	R	R	G	R	G	G	R	R	R
solcap_snp_sl_13589	C	C	C	Y	C	C	C	C	C	C	C	C	T	C	C	C	Y	C	C	C	Y	T	C	C	C	C	Y	T	T	Y	Y	Y	Y	Y	Y	C	C	C	Y	Y	Y	C	Y	Y	T	T	C	C	C
solcap_snp_sl_13590	T	T	T	W	T	T	T	T	T	T	T	T	A	T	T	T	W	T	T	T	W	A	T	T	T	T	W	A	A	W	W	W	W	W	W	T	T	T	W	W	W	T	W	W	A	A	T	T	T
solcap_snp_sl_13594	T	T	T	T	T	T	T	T	T	T	T	T	T	T	T	T	T	T	T	T	T	T	T	T	T	T	T	T	T	T	T	T	T	T	T	T	T	T	T	T	T	T	T	T	T	T	T	T	T
CL009035-0516	G	G	G	K	G	G	G	G	G	G	G	G	T	G	G	G	K	G	G	G	K	T	G	G	G	G	K	T	T	K	K	K	K	K	K	G	G	G	K	K	K	G	K	K	T	T	G	G	G
CL009035-0571	A	A	A	A	A	A	A	A	A	A	A	A	A	A	A	A	A	A	A	A	A	A	A	A	A	A	A	A	A	A	A	A	A	A	A	A	A	A	A	A	A	A	A	A	A	A	A	A	A
solcap_snp_sl_13595	T	T	T	Y	T	T	T	T	T	T	T	T	C	T	T	T	Y	T	T	T	Y	C	T	T	T	T	Y	C	C	Y	Y	Y	Y	Y	Y	T	T	T	Y	Y	Y	T	Y	Y	C	C	T	T	T
solcap_snp_sl_13596	G	G	G	K	G	G	G	G	G	G	G	G	T	G	G	G	K	G	G	G	K	T	G	G	G	G	K	T	T	K	K	K	K	K	K	G	G	G	K	K	K	G	K	K	T	T	G	G	G
solcap_snp_sl_13597	T	T	T	Y	T	T	T	T	T	T	T	T	C	T	T	T	Y	T	T	T	Y	C	T	T	T	T	Y	C	C	Y	Y	Y	Y	Y	Y	T	T	T	Y	Y	Y	T	Y	Y	C	C	T	T	T
solcap_snp_sl_13599	G	G	G	R	G	G	G	G	G	G	G	G	A	G	G	G	R	G	G	G	R	A	G	G	G	G	R	A	A	R	R	R	R	R	R	G	G	G	R	R	R	G	R	R	A	A	G	G	G
solcap_snp_sl_13600	T	T	T	Y	T	T	T	T	T	T	T	T	C	T	T	T	Y	T	T	T	Y	C	T	T	T	T	Y	C	C	Y	Y	Y	Y	Y	Y	T	T	T	Y	Y	Y	T	Y	Y	C	C	T	T	T
solcap_snp_sl_13603	T	T	T	Y	T	T	T	T	T	T	T	T	C	T	T	T	Y	T	T	T	Y	C	T	T	T	T	Y	C	C	Y	Y	Y	Y	Y	Y	T	T	T	Y	Y	Y	T	Y	Y	C	C	T	T	T
solcap_snp_sl_29538	G	G	G	R	G	G	G	G	G	G	G	G	A	G	G	G	R	G	G	G	R	A	G	G	G	G	R	A	A	R	R	R	R	R	R	G	G	G	R	R	R	G	R	R	A	A	G	G	G
solcap_snp_sl_13604	A	A	A	W	A	A	A	A	A	A	A	A	T	A	A	A	W	A	A	A	W	T	A	A	A	A	W	T	T	W	W	W	W	W	W	A	A	A	W	W	W	A	W	W	T	T	A	A	A
solcap_snp_sl_13605	A	A	A	W	A	A	A	A	A	A	A	A	T	A	A	A	W	A	A	A	W	T	A	A	A	A	W	T	T	W	W	W	W	W	W	A	A	A	failed	W	W	A	W	W	T	T	A	A	A
solcap_snp_sl_13606	G	G	G	R	G	G	G	G	G	G	G	G	A	G	G	G	R	G	G	G	R	A	G	G	G	G	R	A	A	R	R	R	R	R	R	G	G	G	R	R	R	G	R	R	A	A	G	G	G
solcap_snp_sl_29540	T	T	T	Y	T	T	T	T	T	T	T	T	C	T	T	T	Y	T	T	T	Y	C	T	T	T	T	Y	C	C	Y	Y	Y	Y	Y	Y	T	T	T	Y	Y	Y	T	Y	Y	C	C	T	T	T
solcap_snp_sl_29541	A	A	A	M	A	A	A	A	A	A	A	A	C	A	A	A	M	A	A	A	M	C	A	A	A	A	M	C	C	M	M	M	M	M	M	A	A	A	M	M	M	A	M	M	C	C	A	A	A
solcap_snp_sl_49322	A	A	A	R	A	A	A	A	A	A	A	A	G	A	A	A	R	A	A	A	R	G	A	A	A	A	R	G	G	R	R	R	R	R	R	A	A	A	R	R	R	A	R	R	G	G	A	A	A
solcap_snp_sl_23863	C	C	C	Y	C	C	C	C	C	C	C	C	T	C	C	C	Y	C	C	C	Y	T	C	C	C	C	Y	T	T	Y	Y	Y	Y	Y	Y	C	C	C	Y	Y	Y	C	Y	Y	T	T	C	C	C
solcap_snp_sl_29543	G	G	G	R	G	G	G	G	G	G	G	G	A	G	G	G	R	G	G	G	R	A	G	G	G	G	R	A	A	R	R	R	R	R	R	G	G	G	R	R	R	G	R	R	A	A	G	G	G
solcap_snp_sl_29545	G	G	G	R	G	G	G	G	G	G	G	G	A	G	G	G	R	G	G	G	R	A	G	G	G	G	R	A	A	R	R	R	R	R	R	G	G	G	R	R	R	G	R	R	A	A	G	G	G
solcap_snp_sl_29546	T	T	T	Y	T	T	T	T	T	T	T	T	C	T	T	T	Y	T	T	T	Y	C	T	T	T	T	Y	C	C	Y	Y	Y	Y	Y	Y	T	T	T	Y	Y	Y	T	Y	Y	C	C	T	T	T
solcap_snp_sl_4578	T	T	T	T	A	T	T	T	T	T	T	T	T	T	T	T	T	T	T	T	T	T	T	T	T	T	T	T	T	T	T	T	T	T	T	T	W	T	T	W	T	W	W	T	T	T	W	W	W
solcap_snp_sl_13611	C	C	C	Y	C	C	C	C	C	C	C	C	T	C	C	C	Y	C	C	C	Y	T	C	C	C	Y	Y	T	T	Y	Y	Y	Y	Y	Y	C	C	C	Y	Y	Y	C	Y	Y	T	T	C	C	C
solcap_snp_sl_13612	T	T	T	Y	T	T	T	T	T	T	T	T	C	T	T	T	Y	T	T	T	Y	C	T	T	T	Y	Y	C	C	Y	Y	Y	Y	Y	Y	T	T	T	Y	Y	Y	T	Y	Y	C	C	T	T	T
solcap_snp_sl_13616	G	G	G	R	G	G	G	G	G	G	G	G	A	G	G	G	R	G	G	G	R	A	G	G	G	R	R	A	A	R	R	R	R	R	R	G	G	G	R	R	R	G	R	R	A	A	G	G	G
solcap_snp_sl_13617	A	A	A	R	A	A	A	A	A	A	A	A	G	A	A	A	R	A	A	A	R	G	A	A	A	R	R	G	G	R	R	R	R	R	R	A	A	A	R	R	R	A	R	R	G	G	A	A	A
solcap_snp_sl_13618	G	G	G	R	G	G	G	G	G	G	G	G	A	G	G	G	R	G	G	G	R	A	G	G	G	R	R	A	A	R	R	R	R	R	R	G	G	G	R	R	R	G	R	R	A	A	G	G	G
solcap_snp_sl_13619	G	G	G	R	G	G	G	G	G	G	G	G	A	G	G	G	R	G	G	G	R	A	G	G	G	R	R	A	A	R	R	R	R	R	R	G	G	G	R	R	R	G	R	R	A	A	G	G	G
solcap_snp_sl_29547	A	A	A	R	A	A	A	A	A	A	A	A	G	A	A	A	R	A	A	A	R	G	A	A	A	R	R	G	G	R	R	R	R	R	R	A	A	A	R	R	R	A	R	R	G	G	A	A	A
solcap_snp_sl_13621	T	T	T	W	T	T	T	T	T	T	T	T	A	T	T	T	W	T	T	T	W	A	T	T	T	W	W	A	A	W	W	W	W	W	W	T	T	T	W	W	W	T	W	W	A	A	T	T	T
solcap_snp_sl_13622	T	T	T	Y	T	T	T	T	T	T	T	T	C	T	T	T	Y	T	T	T	Y	C	T	T	T	Y	Y	C	C	Y	Y	Y	Y	Y	Y	T	T	T	Y	Y	Y	T	Y	Y	C	C	T	T	T
solcap_snp_sl_13623	T	T	T	Y	T	T	T	T	T	T	T	T	C	T	T	T	Y	T	T	T	Y	C	T	T	T	Y	Y	C	C	Y	Y	Y	Y	Y	Y	T	T	T	Y	Y	Y	T	Y	Y	C	C	T	T	T
solcap_snp_sl_13625	C	C	C	Y	C	C	C	C	C	C	C	C	T	C	C	C	Y	C	C	C	Y	T	C	C	C	Y	Y	T	T	Y	Y	Y	Y	Y	Y	C	C	C	Y	Y	Y	C	Y	Y	T	T	C	C	C
solcap_snp_sl_13627	A	A	A	R	A	A	A	A	A	A	A	A	G	A	A	A	R	A	A	A	R	G	A	A	A	R	R	G	G	R	R	R	R	R	R	A	A	A	R	R	R	A	R	R	G	G	A	A	A
solcap_snp_sl_29548	G	G	G	R	G	G	G	G	G	G	G	G	A	G	G	G	R	G	G	G	R	A	G	G	G	R	R	A	A	R	R	R	R	R	R	G	G	G	R	R	R	G	R	R	A	A	G	G	G
solcap_snp_sl_13630	T	T	T	Y	T	T	T	T	T	T	T	T	C	T	T	T	Y	T	T	T	Y	C	T	T	T	Y	Y	C	C	Y	Y	Y	Y	Y	Y	T	T	T	Y	Y	Y	T	Y	Y	C	C	T	T	T
solcap_snp_sl_13631	G	G	G	S	G	G	G	G	G	G	G	G	C	G	G	G	S	G	G	G	S	C	G	G	G	S	S	C	C	S	S	S	S	S	S	G	G	G	S	S	S	G	S	S	C	C	G	G	G
solcap_snp_sl_29549	C	C	C	S	C	C	C	C	C	C	C	C	G	C	C	C	S	C	C	C	S	G	C	C	C	S	S	G	G	S	S	S	S	S	S	C	C	C	S	S	S	C	S	S	G	G	C	C	C
solcap_snp_sl_13632	G	G	G	R	G	G	G	G	G	G	G	G	A	G	G	G	R	G	G	G	R	A	G	G	G	R	R	A	A	R	R	R	R	R	R	G	G	G	R	R	R	G	R	R	A	A	G	G	G
solcap_snp_sl_13633	T	T	T	Y	T	T	T	T	T	T	T	T	C	T	T	T	Y	T	T	T	Y	C	T	T	T	Y	Y	C	C	Y	Y	Y	Y	Y	Y	T	T	T	Y	Y	Y	T	Y	Y	C	C	T	T	T
solcap_snp_sl_13634	T	T	T	K	T	T	T	T	T	T	T	T	G	T	T	T	K	T	T	T	K	G	T	T	T	K	K	G	G	K	K	K	K	K	K	T	T	T	K	K	K	T	K	K	G	G	T	T	T
solcap_snp_sl_13635	G	G	G	R	G	G	G	G	G	G	G	G	A	G	G	G	R	G	G	G	R	A	G	G	G	R	R	A	A	R	R	R	R	R	R	G	G	G	R	R	R	G	R	R	A	A	G	G	G
solcap_snp_sl_13636	G	G	G	R	G	G	G	G	G	G	G	G	A	G	G	G	R	G	G	G	R	A	G	G	G	R	R	A	A	R	R	R	R	R	R	G	G	G	R	R	R	G	R	R	A	A	G	G	G
solcap_snp_sl_13638	C	C	C	Y	C	C	C	C	C	C	C	C	T	C	C	C	Y	C	C	C	Y	T	C	C	C	Y	Y	T	T	Y	Y	Y	Y	Y	Y	C	C	C	failed	Y	Y	C	Y	Y	T	T	C	C	C
solcap_snp_sl_49326	G	G	G	R	G	G	G	G	G	G	G	G	A	G	G	G	R	G	G	G	R	A	G	G	G	R	R	A	A	R	R	R	R	R	R	G	G	G	R	R	R	G	R	R	A	A	G	G	G
solcap_snp_sl_49327	G	G	G	R	G	G	G	G	G	G	G	G	A	G	G	G	R	G	G	G	R	R	G	G	G	R	R	A	G	R	R	G	G	R	R	G	G	G	R	R	G	G	R	R	A	G	G	G	G
solcap_snp_sl_29565	T	T	T	W	T	T	T	T	T	T	T	T	A	T	T	T	W	T	T	T	W	W	T	T	T	W	W	A	T	W	W	W	T	W	W	T	T	T	W	W	T	T	W	T	A	T	T	T	T
solcap_snp_sl_29567	C	C	C	Y	C	C	C	C	C	C	C	C	T	C	C	C	Y	C	C	C	Y	Y	C	C	C	Y	Y	T	C	Y	Y	Y	C	Y	Y	C	C	C	Y	Y	C	C	Y	C	T	C	C	C	C
241_2R_407	T	T	T	K	G	T	T	T	T	T	T	T	G	T	T	T	K	T	T	T	K	T	T	T	T	K	K	G	G	K	T	K	K	K	K	T	K	T	K	G	K	T	K	T	G	G	K	K	T
241_2F_264_241_2b_60_b	T	T	T	Y	C	T	T	T	T	T	T	T	C	T	T	T	Y	T	T	T	Y	T	T	T	T	Y	Y	C	C	Y	T	Y	Y	Y	Y	T	Y	T	Y	C	Y	T	Y	T	C	C	Y	Y	T
solcap_snp_sl_29602	G	G	G	R	G	G	G	G	G	G	G	G	A	G	G	G	R	G	G	G	R	G	G	G	G	R	R	A	G	R	G	R	G	R	R	G	G	G	R	R	G	G	G	G	R	G	G	G	G
SGN-U575873_snp121	C	C	C	S	C	C	C	C	C	C	C	C	G	C	C	C	S	C	C	C	S	C	C	C	C	S	S	S	C	S	C	S	C	S	S	C	C	C	S	C	C	C	C	C	C	C	C	C	C
SGN-U313785_cLEF-41-C3_snp208	A	A	A	R	A	A	A	A	A	A	A	A	G	A	A	A	R	A	A	A	R	A	A	A	A	R	R	R	A	R	A	R	A	R	R	A	A	A	failed	A	A	A	A	A	A	A	A	A	A
solcap_snp_sl_29627	A	A	A	R	A	A	A	A	A	A	A	A	G	A	A	A	R	A	A	A	R	A	A	A	A	R	R	R	A	R	A	R	A	R	R	A	A	A	R	A	A	A	A	A	A	A	A	A	A
solcap_snp_sl_29658	T	T	T	Y	T	T	T	T	T	T	T	T	C	T	T	T	Y	T	T	T	Y	T	T	T	T	C	Y	Y	T	Y	T	Y	T	Y	Y	T	T	T	Y	T	T	T	T	C	T	T	T	T	T
CL009189-0414	T	T	T	T	T	T	T	T	T	T	T	T	C	T	T	T	Y	T	T	T	T	T	T	T	T	T	T	T	T	T	T	Y	T	T	T	T	T	T	T	T	T	T	T	C	T	T	T	T	T
SL10801_170	C	C	C	C	C	C	C	C	C	C	C	C	T	C	C	C	Y	C	C	C	C	C	C	C	C	C	C	C	C	C	C	Y	C	C	C	C	C	C	C	C	C	C	C	T	C	C	C	C	C
solcap_snp_sl_23882	G	G	G	G	G	G	G	G	G	G	G	G	G	G	G	G	G	G	G	G	G	G	G	G	G	G	G	G	G	G	G	R	G	G	G	G	G	G	G	G	G	G	G	G	R	G	G	R	G
CL016172-0092	C	C	C	C	C	C	C	C	C	C	C	C	C	C	C	C	C	C	C	C	C	C	C	C	C	C	C	C	C	C	C	C	C	C	C	C	C	C	C	C	C	C	C	C	C	C	C	C	C
CL016172-0398_solcap_snp_sl_29710	A	A	A	A	A	A	A	A	A	A	A	A	A	A	A	A	A	A	A	A	A	A	A	A	A	A	A	A	A	A	A	A	A	A	A	A	A	A	A	A	A	A	A	G	A	A	A	A	A
solcap_snp_sl_29720	A	A	A	A	A	A	A	A	A	A	A	A	A	A	A	A	A	A	A	A	A	A	A	A	A	A	A	A	A	A	A	A	A	A	A	A	A	A	A	A	A	A	A	G	A	A	A	A	A
solcap_snp_sl_23883	T	T	T	T	T	T	T	T	T	T	T	T	T	T	T	T	T	T	T	T	T	T	T	T	T	T	T	T	T	T	T	Y	T	T	T	T	T	T	T	T	T	T	T	T	Y	T	T	Y	T
solcap_snp_sl_23884	C	C	C	C	C	C	C	C	C	C	C	C	C	C	C	C	C	C	C	C	C	C	C	C	C	C	C	C	C	C	C	Y	C	C	C	C	C	C	C	C	C	C	C	C	Y	C	C	Y	C
solcap_snp_sl_29749	A	A	A	A	A	A	A	A	A	A	A	A	A	A	A	A	A	A	A	A	A	A	A	A	A	A	A	A	A	A	A	A	A	A	A	A	A	A	A	A	A	A	A	G	A	A	A	A	A
solcap_snp_sl_29766	A	A	A	A	A	A	A	A	A	A	A	A	A	A	A	A	A	A	A	A	A	A	A	A	A	A	A	A	A	A	A	A	A	A	A	A	A	A	A	A	A	A	A	G	A	A	A	A	A
solcap_snp_sl_29779	G	G	G	G	G	G	G	G	G	G	G	G	G	G	G	G	G	G	G	G	G	G	G	G	G	G	G	G	G	G	G	G	G	G	G	G	G	G	G	G	G	G	G	T	G	G	G	G	G
CL016725-0417	T	T	T	T	T	T	T	T	T	T	T	T	T	T	T	T	T	T	T	T	T	T	T	T	T	T	T	T	T	T	T	T	T	T	T	T	T	T	T	T	T	T	T	G	T	T	T	T	T
CL016725-0239	A	A	A	A	A	A	A	A	A	A	A	A	A	A	A	A	A	A	A	A	A	A	A	A	A	A	A	A	A	A	A	A	A	A	A	A	A	A	A	A	A	A	A	A	A	A	A	A	A
solcap_snp_sl_29785	A	A	A	A	A	A	A	A	A	A	A	A	A	A	A	A	A	A	A	A	A	A	A	A	A	A	A	A	A	A	A	A	A	A	A	A	A	A	A	A	A	A	A	G	A	A	A	A	A
SGN-U585712_snp102623	G	G	G	G	G	G	G	G	G	G	G	G	G	G	G	G	G	G	G	G	G	G	G	G	G	G	G	G	G	G	G	G	G	G	G	G	G	G	G	G	G	G	G	G	G	G	G	G	G
SGN-U585712_snp101557	A	A	A	A	A	A	A	A	A	A	A	A	A	A	A	A	A	A	A	A	A	A	A	A	A	A	A	A	A	A	A	A	A	A	A	A	A	A	A	A	A	A	A	A	A	A	A	A	A
solcap_snp_sl_29789	G	G	G	G	G	G	G	G	G	G	G	G	G	G	G	G	G	G	G	G	G	G	G	G	G	G	G	G	G	G	G	G	G	G	G	G	G	G	G	G	G	G	G	A	G	G	G	G	G
SGN-U581277_snp815	A	A	A	A	A	A	A	A	A	A	A	A	A	A	A	A	A	A	A	A	A	A	A	A	A	A	A	A	A	A	A	A	A	A	A	A	A	A	A	A	A	A	A	G	A	A	A	A	A
solcap_snp_sl_29814	A	A	A	A	A	A	A	A	A	A	A	A	A	A	A	A	A	A	A	A	A	A	A	A	A	A	A	A	A	A	A	A	A	A	A	A	A	A	A	A	A	A	A	G	A	A	A	A	A
solcap_snp_sl_29826	T	T	T	T	T	T	T	T	T	T	T	T	T	T	T	T	T	T	T	T	T	T	T	T	T	T	T	T	T	T	T	T	T	T	T	T	T	T	T	T	T	T	T	C	T	T	T	T	T
solcap_snp_sl_29840	C	C	C	C	C	C	C	C	C	C	C	C	C	C	C	C	C	C	C	C	C	C	C	C	C	C	C	C	C	C	C	C	C	C	C	C	C	C	C	C	C	C	C	T	C	C	C	C	C
solcap_snp_sl_18397	A	A	A	A	R	A	A	A	A	A	A	A	A	A	A	A	A	A	A	A	A	R	G	G	R	A	A	A	G	A	A	R	R	A	A	R	R	A	R	R	R	G	R	G	R	R	R	G	G
solcap_snp_sl_18398	C	C	C	C	M	C	C	C	C	C	C	C	C	C	C	C	C	C	C	C	C	C	A	A	M	C	C	C	A	C	C	M	C	C	C	M	M	C	M	M	M	A	M	C	M	M	M	A	A
solcap_snp_sl_18399	G	G	G	G	R	G	G	G	G	G	G	G	G	G	G	G	G	G	G	G	G	G	A	A	R	G	G	G	A	G	G	R	G	G	G	R	R	G	R	R	R	A	R	G	R	R	R	A	A
solcap_snp_sl_18400	G	G	G	G	R	G	G	G	G	G	G	G	G	G	G	G	G	G	G	G	G	G	A	A	R	G	G	G	A	G	G	R	G	G	G	R	R	G	R	R	R	A	R	G	R	R	R	A	A
solcap_snp_sl_49428	A	A	A	A	A	A	A	A	A	A	A	A	A	A	A	A	A	A	A	A	A	A	A	A	A	A	A	A	A	A	A	A	A	A	A	A	A	A	A	A	A	A	A	G	A	A	A	A	A
solcap_snp_sl_18401	G	G	G	G	R	G	G	G	G	G	G	G	G	G	G	G	G	G	G	G	G	G	A	A	R	G	G	G	A	G	G	R	G	G	G	R	R	G	R	R	R	A	R	A	R	R	R	A	A
CL017742-0462	C	C	C	C	C	C	C	C	C	C	C	C	C	C	C	C	C	C	C	C	C	C	C	C	C	C	C	C	C	C	C	C	C	C	C	C	C	C	C	C	C	C	C	G	C	C	C	C	C
CL015542-0573	A	A	A	A	A	A	A	A	A	A	A	A	A	A	A	A	A	A	A	A	A	A	A	A	A	A	A	A	A	A	A	A	A	A	A	A	A	A	A	A	A	A	A	C	A	A	A	A	A
CL015292-0316	T	T	T	T	T	T	T	T	T	T	T	T	T	T	T	T	T	T	T	T	T	T	T	T	T	T	T	T	T	T	T	T	T	T	T	T	T	T	T	T	T	T	T	T	T	T	T	T	T
solcap_snp_sl_49458	G	G	G	G	G	G	G	G	G	G	G	G	G	G	G	G	G	G	G	G	G	G	G	G	G	G	G	G	G	G	G	G	G	G	G	G	G	G	G	G	G	G	G	T	G	G	G	G	G
SGN-U582680_snp71245	C	C	C	C	C	C	C	C	C	C	C	C	C	C	C	C	C	C	C	C	C	C	C	C	C	C	C	C	C	C	C	C	C	C	C	C	C	C	C	C	C	C	C	C	C	C	C	C	C
solcap_snp_sl_18419	T	T	T	T	T	T	T	T	T	T	T	T	T	T	T	T	T	T	T	T	T	T	T	T	T	T	T	T	T	T	T	Y	T	T	T	T	T	T	T	T	T	C	T	T	T	T	T	T	C
solcap_snp_sl_18420	G	G	G	G	G	G	G	G	G	G	G	G	G	G	G	G	G	G	G	G	G	G	G	G	G	G	G	G	G	G	G	R	G	G	G	G	G	G	G	G	G	A	G	G	G	G	G	G	A
solcap_snp_sl_49480	G	G	G	G	G	G	G	G	G	G	G	G	G	G	G	G	G	G	G	G	G	G	G	G	G	G	G	G	G	G	G	G	G	G	G	G	G	G	G	G	G	G	G	G	G	G	G	G	G
solcap_snp_sl_18421	C	C	C	C	C	C	C	C	C	C	C	C	C	C	C	C	C	C	C	C	C	C	C	C	C	C	C	C	C	C	C	Y	C	C	C	C	C	C	C	C	C	T	C	T	C	C	C	C	T
solcap_snp_sl_49490	G	G	G	G	G	G	G	G	G	G	G	G	G	G	G	G	G	G	G	G	G	G	G	G	G	G	G	G	G	G	G	G	G	G	G	G	G	G	G	G	G	G	G	T	G	G	G	G	G
SGN-U313245_T0562_snp547	C	C	C	C	C	C	C	C	C	C	C	C	C	C	C	C	C	C	C	C	C	C	C	C	C	C	C	C	C	C	C	C	C	C	C	C	C	C	C	C	C	C	C	T	C	C	C	C	C
solcap_snp_sl_49497	G	G	G	G	G	G	G	G	G	G	G	G	G	G	G	G	G	G	G	G	G	G	G	G	G	G	G	G	G	G	G	G	G	G	G	G	G	G	G	G	G	G	G	A	G	G	G	G	G
solcap_snp_sl_49500	A	A	A	A	A	A	A	A	A	A	A	A	A	A	A	A	A	A	A	A	A	A	A	A	A	A	A	A	A	A	A	A	A	A	A	A	A	A	A	A	A	A	A	G	A	A	A	A	A
solcap_snp_sl_49505	T	T	T	T	T	T	T	T	T	T	T	T	T	T	T	T	T	T	T	T	T	T	T	T	T	T	T	T	T	T	T	T	T	T	T	T	T	T	T	T	T	T	T	A	T	T	T	T	T
SGN-U574334_snp341_solcap_snp_sl_49507	C	C	C	C	C	C	C	C	C	C	C	C	C	C	C	C	C	C	C	C	C	C	C	C	C	C	C	C	C	C	C	C	C	C	C	C	C	C	C	C	C	C	C	T	C	C	C	C	C
solcap_snp_sl_49517	T	T	T	T	T	T	T	T	T	T	T	T	T	T	T	T	T	T	T	T	T	T	T	T	T	T	T	T	T	T	T	T	T	T	T	T	T	T	T	T	T	T	T	T	T	T	T	T	T
solcap_snp_sl_49535	C	C	C	C	C	C	C	C	C	C	C	C	C	C	C	C	C	C	C	C	C	C	C	C	C	C	C	C	C	C	C	C	C	C	C	C	C	C	C	C	C	C	C	T	C	C	C	C	C
CL017734-0752	G	G	G	G	G	G	G	G	G	G	G	G	G	G	G	G	G	G	G	G	G	G	G	G	G	G	G	G	G	G	G	G	G	G	G	G	G	G	G	G	G	G	G	G	G	G	G	G	G
SGN-U315352_snp103	C	C	C	C	C	C	C	C	C	C	C	C	C	C	C	C	C	C	C	C	C	C	C	C	C	C	C	C	C	C	C	C	C	C	C	C	C	C	C	C	C	C	C	T	C	C	C	C	C
CL017181-0258	C	C	C	C	C	C	C	C	C	C	C	C	C	C	C	C	C	C	C	C	C	C	C	C	C	C	C	C	C	C	C	C	C	C	C	C	C	C	C	C	C	C	C	C	C	C	C	C	C
solcap_snp_sl_18441	C	C	C	C	C	C	C	C	C	C	C	C	C	C	C	C	C	C	C	C	C	C	C	C	Y	C	C	C	C	Y	C	C	C	C	Y	Y	C	Y	Y	C	Y	C	C	C	C	Y	Y	C	C
solcap_snp_sl_18443	G	G	G	G	G	G	G	G	G	G	G	G	G	G	G	G	G	G	G	G	G	G	G	G	K	G	G	G	G	K	G	G	G	G	K	K	G	K	K	G	K	G	G	G	G	K	K	G	G
solcap_snp_sl_18444	G	G	G	G	G	G	G	G	G	G	G	G	G	G	G	G	G	G	G	G	G	G	G	G	R	G	G	G	G	R	G	G	G	G	R	R	G	R	R	G	R	G	G	G	G	R	R	G	G
solcap_snp_sl_18445	G	G	G	G	G	G	G	G	G	G	G	G	G	G	G	G	G	G	G	G	G	G	G	G	K	G	G	G	G	K	G	G	G	G	K	K	G	K	K	G	K	G	G	G	G	K	K	G	G
solcap_snp_sl_49576	T	T	T	T	T	T	T	T	T	T	T	T	T	T	T	T	T	T	T	T	T	T	T	T	K	T	T	T	T	K	T	T	T	T	K	K	T	K	K	T	K	T	T	G	T	K	K	T	T
solcap_snp_sl_18447	A	A	A	A	A	A	A	A	A	A	A	A	A	A	A	A	A	A	A	A	A	A	A	A	R	A	A	A	A	R	A	A	A	A	R	R	A	R	R	A	R	A	A	A	A	R	R	A	A
solcap_snp_sl_18448	G	G	G	G	G	G	G	G	G	G	G	G	G	G	G	G	G	G	G	G	G	G	G	G	R	G	G	G	G	R	G	G	G	G	R	R	G	R	R	G	R	G	G	G	G	R	R	G	G
solcap_snp_sl_18449	C	C	C	C	C	C	C	C	C	C	C	C	C	C	C	C	C	C	C	C	C	C	C	C	Y	C	C	C	C	Y	C	C	C	C	Y	Y	C	Y	Y	C	Y	C	C	C	C	Y	Y	C	C
solcap_snp_sl_18450	C	C	C	C	C	C	C	C	C	C	C	C	C	C	C	C	C	C	C	C	C	C	C	C	M	C	C	C	C	M	C	C	C	C	M	M	C	M	M	C	M	C	C	C	C	M	M	C	C
solcap_snp_sl_18451	G	G	G	G	G	G	G	G	G	G	G	G	G	G	G	G	G	G	G	G	G	G	G	G	R	G	G	G	G	R	G	G	G	G	R	R	G	R	R	G	R	G	G	G	G	R	R	G	G
solcap_snp_sl_18452	T	T	T	T	T	T	T	T	T	T	T	T	T	T	T	T	T	T	T	T	T	T	T	T	K	T	T	T	T	K	T	T	T	T	K	K	T	K	K	T	K	T	T	T	T	K	K	T	T
solcap_snp_sl_18453	A	A	A	A	A	A	A	A	A	A	A	A	A	A	A	A	A	A	A	A	A	A	A	A	R	A	A	A	A	R	A	A	A	A	R	R	A	R	R	A	R	A	A	G	A	R	R	A	A
solcap_snp_sl_18455	A	A	A	A	A	A	A	A	A	A	A	A	A	A	A	A	A	A	A	A	A	A	A	A	R	A	A	A	A	R	A	A	A	A	R	R	A	R	R	A	R	A	A	A	A	R	R	A	A
solcap_snp_sl_49579	T	T	T	T	T	T	T	T	T	T	T	T	T	T	T	T	T	T	T	T	T	T	T	T	T	T	T	T	T	T	T	T	T	T	T	T	T	T	T	T	T	T	T	A	T	T	T	T	T
SGN-U580456_snp788_solcap_snp_sl_49586	C	C	C	C	C	C	C	C	C	C	C	C	C	C	C	C	C	C	C	C	C	C	C	C	C	C	C	C	C	C	C	C	C	C	C	C	C	C	C	C	C	C	C	C	C	C	C	C	C
SGN-U575324_snp56571	C	C	C	C	C	C	C	C	C	C	C	C	C	C	C	C	C	C	C	C	C	C	C	C	C	C	C	C	C	C	C	C	C	C	C	C	C	C	C	C	C	C	C	A	C	C	C	C	C
SGN-U575324_snp56576	G	G	G	G	G	G	G	G	G	G	G	G	G	G	G	G	G	G	G	G	G	G	G	G	G	G	G	G	G	G	G	G	G	G	G	G	G	G	G	G	G	G	G	G	G	G	G	G	G
SGN-U575324_snp57048	G	G	G	G	G	G	G	G	G	G	G	G	G	G	G	G	G	G	G	G	G	G	G	G	G	G	G	G	G	G	G	G	G	G	G	G	G	G	G	G	G	G	G	A	G	G	G	G	G
SGN-U575324_snp58160	G	G	G	G	G	G	G	G	G	G	G	G	G	G	G	G	G	G	G	G	G	G	G	G	G	G	G	G	G	G	G	G	G	G	G	G	G	G	G	G	G	G	G	G	G	G	G	G	G
SGN-U575324_snp58163	G	G	G	G	G	G	G	G	G	G	G	G	G	G	G	G	G	G	G	G	G	G	G	G	G	G	G	G	G	G	G	G	G	G	G	G	G	G	G	G	G	G	G	G	G	G	G	G	G
solcap_snp_sl_49606	T	T	T	T	T	T	T	T	T	T	T	T	T	T	T	T	T	T	T	T	T	T	Y	C	Y	T	T	T	C	Y	T	C	T	T	Y	Y	Y	Y	C	Y	C	Y	Y	T	Y	C	C	Y	T
CL009173-0541	T	T	T	T	T	T	T	T	T	T	T	T	T	T	T	T	T	T	T	T	T	T	T	T	T	T	T	T	T	T	T	T	T	T	T	T	T	T	T	T	T	T	T	A	T	T	T	T	T
DOT_411	T	T	T	T	T	T	T	T	T	T	T	T	T	T	T	T	T	T	T	T	T	T	T	T	T	T	T	T	T	T	T	T	T	T	T	T	T	T	T	T	T	T	T	T	T	T	T	T	T
DOT_468	T	T	T	T	T	T	T	T	T	T	T	T	T	T	T	T	T	T	T	T	T	T	T	T	T	T	T	T	T	T	T	T	T	T	T	T	T	T	T	T	T	T	T	T	T	T	T	T	T
solcap_snp_sl_49613	T	T	T	T	T	T	T	T	T	T	T	T	T	T	T	T	T	T	T	T	T	T	T	T	T	T	T	T	T	T	T	T	T	T	T	T	T	T	T	T	T	T	T	C	T	T	T	T	T
solcap_snp_sl_49645	C	C	C	C	C	C	C	C	C	C	C	C	C	C	C	C	C	C	C	C	C	C	C	C	C	C	C	C	C	C	C	C	C	C	C	C	C	C	C	C	C	C	C	T	C	C	C	C	C
CL016050-0434	A	A	A	A	A	A	A	A	A	A	A	A	A	A	A	A	A	A	A	A	A	A	A	A	A	A	A	A	A	A	A	A	A	A	A	A	A	A	A	A	A	A	A	G	A	A	A	A	A
SGN-U586140_snp1218_solcap_snp_sl_49661	C	C	C	C	C	C	C	C	C	C	C	C	C	C	C	C	C	C	C	C	C	C	C	C	C	C	C	C	C	C	C	C	C	C	C	C	C	C	C	C	C	C	C	G	C	C	C	C	C
solcap_snp_sl_49664	G	G	G	G	G	G	G	G	G	G	G	G	G	G	G	G	G	G	G	G	G	G	G	G	G	G	G	G	G	G	G	G	G	G	G	G	G	G	G	G	G	G	G	A	G	G	G	G	G
solcap_snp_sl_23909	T	T	T	T	T	T	T	T	T	T	T	T	T	T	T	T	T	T	T	T	T	T	Y	C	Y	T	T	T	C	Y	T	C	T	T	Y	Y	Y	Y	C	Y	C	T	Y	C	T	C	C	Y	T
solcap_snp_sl_49669	G	G	G	G	G	G	G	G	G	G	G	G	G	G	G	G	G	G	G	G	G	G	G	G	G	G	G	G	G	G	G	G	G	G	G	G	G	G	G	G	G	G	G	A	G	G	G	G	G
CL015261-0333	A	A	A	A	A	A	A	A	A	A	A	A	A	A	A	A	A	A	A	A	A	A	A	A	A	A	A	A	A	A	A	A	A	A	A	A	A	A	A	A	A	A	A	A	A	A	A	A	A
CL015261-0146	T	T	T	T	T	T	T	T	T	T	T	T	T	T	T	T	T	T	T	T	T	T	T	T	T	T	T	T	T	T	T	T	T	T	T	T	T	T	T	T	T	T	T	A	T	T	T	T	T
solcap_snp_sl_49679	C	C	C	C	C	C	C	C	C	C	C	C	C	C	C	C	C	C	C	C	C	C	C	C	C	C	C	C	C	C	C	C	C	C	C	C	C	C	C	C	C	C	C	T	C	C	C	C	C
CL016002-0147	T	T	T	T	T	T	T	T	T	T	T	T	T	T	T	T	T	T	T	T	T	T	T	T	T	T	T	T	T	T	T	T	T	T	T	T	T	T	T	T	T	T	T	T	T	T	T	T	T
solcap_snp_sl_29869	T	T	T	T	T	T	T	T	T	T	T	T	T	T	T	T	T	T	T	T	T	T	T	T	T	T	T	T	T	T	T	T	T	T	T	T	T	T	T	T	T	T	T	T	T	T	T	T	T
solcap_snp_sl_49726	G	G	G	G	G	G	G	G	G	G	G	G	G	G	G	G	G	G	G	G	G	G	G	G	G	G	G	G	G	G	G	G	G	G	G	G	G	G	G	G	G	G	G	A	G	G	G	G	G
CL015741-0547	A	A	A	A	A	A	A	A	A	A	A	A	A	A	A	A	A	A	A	A	A	A	A	A	A	A	A	A	A	A	A	A	A	A	A	A	A	A	A	A	A	A	A	G	A	A	A	A	A
CL015119-0265_solcap_snp_sl_49752	A	A	A	A	A	A	A	A	A	A	A	A	A	A	A	A	A	A	A	A	A	A	A	A	A	A	A	A	A	A	A	A	A	A	A	A	A	A	A	A	A	A	A	T	A	A	A	A	A
CL016571-0142	C	C	C	C	C	C	C	C	C	C	C	C	C	C	C	C	C	C	C	C	C	C	C	C	C	C	C	C	C	C	C	C	C	C	C	C	C	C	C	C	C	C	C	C	C	C	C	C	C
solcap_snp_sl_49767	C	C	C	C	C	C	C	C	C	C	C	C	C	C	C	C	C	C	C	C	C	C	C	C	C	C	C	C	C	C	C	C	C	C	C	C	C	C	C	C	C	C	C	T	C	C	C	C	C
solcap_snp_sl_49786	A	A	A	A	A	A	A	A	A	A	A	A	A	A	A	A	A	A	A	A	A	A	A	A	A	A	A	A	A	A	A	A	A	A	A	A	A	A	A	A	A	A	A	G	A	A	A	A	A
SGN-U584914_snp1830	T	T	T	T	T	T	T	T	T	T	T	T	T	T	T	T	T	T	T	T	T	T	T	T	T	T	T	T	T	T	T	T	T	T	T	T	T	T	T	T	T	T	T	C	T	T	Y	Y	T
CL015133-0476	T	T	T	T	T	T	T	T	T	T	T	T	T	T	T	T	T	T	T	T	T	T	T	T	T	T	T	T	T	T	T	T	T	T	T	T	T	T	T	T	T	T	T	T	T	T	T	T	T
solcap_snp_sl_49803	G	G	G	G	G	G	G	G	G	G	G	G	G	G	G	G	G	G	G	G	G	G	G	G	G	G	G	G	G	G	G	G	G	G	G	G	G	G	G	G	G	G	G	A	G	G	R	R	G
CL017414-0044	G	G	G	G	G	G	G	G	G	G	G	G	G	G	G	G	G	G	G	G	G	G	G	G	G	G	G	G	G	G	G	G	G	G	G	G	G	G	G	G	G	G	G	G	G	G	G	G	G
CL017414-0128	A	A	A	A	A	A	A	A	A	A	A	A	A	A	A	A	A	A	A	A	A	A	A	A	A	A	A	A	A	A	A	A	A	A	A	A	A	A	A	A	A	A	A	G	A	A	R	R	A
solcap_snp_sl_29887	C	C	C	C	C	C	C	C	C	C	C	C	C	C	C	C	C	C	C	C	C	C	C	C	C	C	C	C	C	C	C	C	C	C	C	C	C	C	C	C	C	C	C	C	C	C	C	C	C
solcap_snp_sl_29891	T	T	T	T	T	T	T	T	T	T	T	T	T	T	T	T	T	T	T	T	T	T	T	T	T	T	T	T	T	T	T	T	T	T	T	T	T	T	T	T	T	T	T	C	T	T	Y	Y	T
solcap_snp_sl_23925	G	G	G	G	G	G	G	G	G	G	G	G	G	G	G	G	G	G	G	G	G	G	G	G	G	G	G	G	G	G	G	G	G	G	G	G	G	G	G	G	G	G	G	G	G	G	G	G	G
SGN-U576591_snp67938	A	A	A	A	A	A	A	A	A	A	A	A	A	A	A	A	A	A	A	A	A	A	A	A	A	A	A	A	A	A	A	A	A	A	A	A	A	A	A	A	A	A	A	T	A	A	W	W	A
SGN-U576591_snp65026	C	C	C	C	C	C	C	C	C	C	C	C	C	C	C	C	C	C	C	C	C	C	C	C	C	C	C	C	C	C	C	C	C	C	C	C	C	C	C	C	C	C	C	A	C	C	M	M	C
SGN-U586520_snp61264	C	C	C	C	C	C	C	C	C	C	C	C	C	C	C	C	C	C	C	C	C	C	C	C	C	C	C	C	C	C	C	C	C	C	C	C	C	C	C	C	C	C	C	G	C	C	S	S	C
SGN-U586520_snp61163	G	G	G	G	G	G	G	G	G	G	G	G	G	G	G	G	G	G	G	G	G	G	G	G	G	G	G	G	G	G	G	G	G	G	G	G	G	G	G	G	G	G	G	A	G	G	R	R	G
SGN-U586520_snp60358	G	G	G	G	G	G	G	G	G	G	G	G	G	G	G	G	G	G	G	G	G	G	G	G	G	G	G	G	G	G	G	G	G	G	G	G	G	G	G	G	G	G	G	A	G	G	R	R	G
CL016721-0530	A	A	A	A	A	A	A	A	A	A	A	A	A	A	A	A	A	A	A	A	A	A	A	A	A	A	A	A	A	A	A	A	A	A	A	A	A	A	A	A	A	A	A	A	A	A	A	A	A
solcap_snp_sl_49909	C	C	C	C	C	C	C	C	C	C	C	C	C	C	C	C	C	C	C	C	C	C	C	C	C	C	C	C	C	C	C	C	C	C	C	C	C	C	C	C	C	C	C	C	C	C	C	C	C
CL015604-0460	T	T	T	T	T	T	T	T	T	T	T	T	T	T	T	T	T	T	T	T	T	T	T	T	T	T	T	T	T	T	T	T	T	T	T	T	T	T	T	T	T	T	T	T	T	T	T	T	T
SGN-U581579_snp1167_solcap_snp_sl_49921	A	A	A	A	A	A	A	A	A	A	A	A	A	A	A	A	A	A	A	A	A	A	A	A	A	A	A	A	A	A	A	A	A	A	A	A	A	A	A	A	A	A	A	G	A	A	R	R	A
solcap_snp_sl_49928	T	T	T	T	T	T	T	T	T	T	T	T	T	T	T	T	T	T	T	T	T	T	T	T	T	T	T	T	T	T	T	T	T	T	T	T	T	T	T	T	T	T	T	C	T	T	Y	Y	T
SL10390_312	G	G	G	G	G	G	G	G	G	G	G	G	G	G	G	G	G	G	G	G	G	G	G	G	G	G	G	G	G	G	G	G	G	G	G	G	G	G	G	G	G	G	G	A	G	G	R	R	G
CL000175-0403	C	C	C	C	C	C	C	C	C	C	C	C	C	C	C	C	C	C	C	C	C	C	C	C	C	C	C	C	C	C	C	C	C	C	C	C	C	C	C	C	C	C	C	C	C	C	C	C	C
solcap_snp_sl_49964	T	T	T	T	T	T	T	T	T	T	T	T	T	T	T	T	T	T	T	T	T	T	T	T	T	T	T	T	T	T	T	T	T	T	T	T	T	T	T	T	T	T	T	T	T	T	T	T	T
solcap_snp_sl_49965	C	C	C	C	C	C	C	C	C	C	C	C	C	C	C	C	C	C	C	C	C	C	C	C	C	C	C	C	C	C	C	C	C	C	C	C	C	C	C	C	C	C	C	G	C	C	S	S	C
solcap_snp_sl_4829	A	A	A	A	A	T	A	A	A	A	A	A	A	A	A	A	A	T	A	A	A	A	A	A	W	A	A	A	T	T	A	T	A	A	W	W	W	W	T	W	T	A	A	A	A	T	W	A	A
SGN-U589573_snp49325	A	A	A	A	A	A	A	A	A	A	A	A	A	A	A	A	A	A	A	A	A	A	A	A	A	A	A	A	A	A	A	A	A	A	A	A	A	A	A	A	A	A	A	G	A	A	R	R	A
solcap_snp_sl_18519	A	A	A	A	A	C	A	A	A	A	A	A	A	A	A	A	A	C	A	A	A	A	A	A	A	A	A	A	A	A	A	A	A	A	A	A	A	A	A	A	A	A	A	A	A	A	A	A	A
SGN-U576696_snp60390_solcap_snp_sl_49988	A	A	A	A	A	A	A	A	A	A	A	A	A	A	A	A	A	A	A	A	A	A	A	A	A	A	A	A	A	A	A	A	A	A	A	A	A	A	A	A	A	A	A	G	A	A	R	R	A
solcap_snp_sl_4831	A	A	A	A	A	C	A	A	A	A	A	A	A	A	A	A	A	C	A	A	A	A	A	A	M	A	A	A	C	C	A	C	A	A	M	M	M	M	C	M	C	A	A	A	A	C	M	A	A
SGN-U576696_snp60503_solcap_snp_sl_49989	A	A	A	A	A	A	A	A	A	A	A	A	A	A	A	A	A	A	A	A	A	A	A	A	A	A	A	A	A	A	A	A	A	A	A	A	A	A	A	A	A	A	A	G	A	A	R	R	A
SGN-U576696_snp60922_solcap_snp_sl_49990	G	G	G	G	G	G	G	G	G	G	G	G	G	G	G	G	G	G	G	G	G	G	G	G	G	G	G	G	G	G	G	G	G	G	G	G	G	G	G	G	G	G	G	T	G	G	K	K	G
SGN-U576696_snp63171	G	G	G	G	G	G	G	G	G	G	G	G	G	G	G	G	G	G	G	G	G	G	G	G	G	G	G	G	G	G	G	G	G	G	G	G	G	G	G	G	G	G	G	A	G	G	R	R	G
solcap_snp_sl_49992	T	T	T	T	T	T	T	T	T	T	T	T	T	T	T	T	T	T	T	T	T	T	T	T	T	T	T	T	T	T	T	T	T	T	T	T	T	T	T	T	T	T	T	C	T	T	Y	Y	T
SGN-U576696_snp63345	T	T	T	T	T	T	T	T	T	T	T	T	T	T	T	T	T	T	T	T	T	T	T	T	T	T	T	T	T	T	T	T	T	T	T	T	T	T	T	T	T	T	T	T	T	T	T	T	T
SGN-U576696_snp63353	T	T	T	T	T	T	T	T	T	T	T	T	T	T	T	T	T	T	T	T	T	T	T	T	T	T	T	T	T	T	T	T	T	T	T	T	T	T	T	T	T	T	T	Y	T	T	Y	Y	T
SGN-U576696_snp63395	A	A	A	A	A	A	A	A	A	A	A	A	A	A	A	A	A	A	A	A	A	A	A	A	A	A	A	A	A	A	A	A	A	A	A	A	A	A	A	A	A	A	A	failed	A	A	W	W	A
SGN-U576696_snp63402	T	T	T	T	T	T	T	T	T	T	T	T	T	T	T	T	T	T	T	T	T	T	T	T	T	T	T	T	T	T	T	T	T	T	T	T	T	T	T	T	T	T	T	A	T	T	W	W	T
SGN-U576696_snp63412	C	C	C	C	C	C	C	C	C	C	C	C	C	C	C	C	C	C	C	C	C	C	C	C	C	C	C	C	C	C	C	C	C	C	C	C	C	C	C	C	C	C	C	T	C	C	Y	Y	C
solcap_snp_sl_49996	C	C	C	C	C	C	C	C	C	C	C	C	C	C	C	C	C	C	C	C	C	C	C	C	C	C	C	C	C	C	C	C	C	C	C	C	C	C	C	C	C	C	C	C	C	C	C	C	C
solcap_snp_sl_50004	C	C	C	C	C	C	C	C	C	C	C	C	C	C	C	C	C	C	C	C	C	C	C	C	C	C	C	C	C	C	C	C	C	C	C	C	C	C	C	C	C	C	C	A	C	C	M	M	C
solcap_snp_sl_4842	T	T	T	T	T	T	T	T	T	T	T	T	T	T	T	T	T	T	T	T	T	T	T	T	Y	T	T	T	C	C	T	C	T	T	Y	Y	C	Y	C	Y	C	T	T	T	T	C	Y	T	T
CL015008-0195	C	C	C	C	C	C	C	C	C	C	C	C	C	C	C	C	C	C	C	C	C	C	C	C	C	C	C	C	C	C	C	C	C	C	C	C	C	C	C	C	C	C	C	T	C	C	Y	Y	C
solcap_snp_sl_50012	T	T	T	T	T	T	T	T	T	T	T	T	T	T	T	T	T	T	T	T	T	T	T	T	T	T	T	T	T	T	T	T	T	T	T	T	T	T	T	T	T	T	T	A	T	T	W	W	T
solcap_snp_sl_17161	A	A	A	A	A	T	A	A	A	A	A	A	A	A	A	A	A	T	A	A	A	A	A	A	A	A	A	A	A	A	A	A	A	A	A	A	A	A	A	A	A	A	A	T	A	A	W	W	A
solcap_snp_sl_42699	G	G	G	G	G	G	G	G	G	G	G	G	G	G	G	G	G	G	G	G	G	G	G	G	G	G	G	G	G	G	G	G	G	G	G	G	G	G	G	G	G	G	G	A	G	G	R	R	G
CL017838-0265	T	T	T	T	T	T	T	T	T	T	T	T	T	T	T	T	T	T	T	T	T	T	T	T	T	T	T	T	T	T	T	T	T	T	T	T	T	T	T	T	T	T	T	C	T	T	Y	Y	T
solcap_snp_sl_42692	T	T	T	T	T	T	T	T	T	T	T	T	T	T	T	T	T	T	T	T	T	T	T	T	T	T	T	T	T	T	T	T	T	T	T	T	T	T	T	T	T	T	T	C	T	T	Y	Y	T
SGN-U568929_snp230_solcap_snp_sl_42681	C	C	C	C	C	C	C	C	C	C	C	C	C	C	C	C	C	C	C	C	C	C	C	C	C	C	C	C	C	C	C	C	C	C	C	C	C	Y	C	C	C	C	C	T	C	C	Y	Y	C
solcap_snp_sl_42678	C	C	C	C	C	C	C	C	C	C	C	C	C	C	C	C	C	C	C	C	C	C	C	C	C	C	C	C	C	C	C	C	C	C	C	C	C	Y	C	C	C	C	C	T	C	C	Y	Y	C
SGN-U571023_snp534	C	C	C	C	C	C	C	C	C	C	C	C	C	C	C	C	C	C	C	C	C	C	C	C	C	C	C	C	C	C	C	C	C	C	C	C	C	Y	C	C	C	C	C	T	C	C	Y	Y	C
solcap_snp_sl_42639	T	T	T	T	T	T	T	T	T	T	T	T	T	T	T	T	T	T	T	T	T	T	T	T	T	T	T	T	T	T	T	T	T	T	T	T	T	Y	T	T	T	T	T	C	T	T	Y	Y	T
CL017245-0136	A	A	A	A	A	A	A	A	A	A	A	A	A	A	A	A	A	A	A	A	A	A	A	A	A	A	A	A	A	A	A	A	A	A	A	A	A	W	A	A	A	A	A	T	A	A	W	W	A
solcap_snp_sl_42625	T	T	T	T	T	T	T	T	T	T	T	T	T	T	T	T	T	T	T	T	T	T	T	T	T	T	T	T	T	T	T	T	T	T	T	T	T	Y	T	T	T	T	T	C	T	T	Y	Y	T
SGN-U320705_snp63	G	G	G	G	G	G	G	G	G	G	G	G	G	G	G	G	G	G	G	G	G	G	G	G	G	G	G	G	G	G	G	G	G	G	G	G	G	G	G	G	G	G	G	A	G	G	G	G	G
SGN-U316197_C2_At4g36530_snp168	T	T	T	T	T	T	T	T	T	T	T	T	T	T	T	T	T	T	T	T	T	T	T	T	T	T	T	T	T	T	T	T	T	T	T	T	T	T	T	T	T	T	T	G	T	T	T	T	T
SGN-U568700_snp42664	C	C	C	C	C	C	C	C	C	C	C	C	C	C	C	C	C	C	C	C	C	C	C	C	C	C	C	C	C	C	C	C	C	C	C	C	C	C	C	C	C	C	C	T	C	C	C	C	C
SGN-U568700_snp42655	A	A	A	A	A	A	A	A	A	A	A	A	A	A	A	A	A	A	A	A	A	A	A	A	A	A	A	A	A	A	A	A	A	A	A	A	A	A	A	A	A	A	A	T	A	A	A	A	A
SGN-U568700_snp42142	T	T	T	T	T	T	T	T	T	T	T	T	T	T	T	T	T	T	T	T	T	T	T	T	T	T	T	T	T	T	T	T	T	T	T	T	T	T	T	T	T	T	T	T	T	T	T	T	T
CL016442-0175	C	C	C	C	C	C	C	C	C	C	C	C	C	C	C	C	C	C	C	C	C	C	C	C	C	C	C	C	C	C	C	C	C	C	C	C	C	C	C	C	C	C	C	C	C	C	C	C	C
Ovate_SNP1	A	A	A	A	A	A	A	A	A	A	A	A	A	A	A	A	A	A	A	A	A	A	A	A	A	A	A	A	A	A	A	A	A	A	A	A	A	A	A	A	A	A	A	A	A	A	A	A	A
CL015100-0473	T	T	T	T	T	T	T	T	T	T	T	T	T	T	T	T	T	T	T	T	T	T	T	T	T	T	T	T	T	T	T	T	T	T	T	T	T	T	T	T	T	T	T	C	T	T	T	T	T
solcap_snp_sl_42537	T	T	T	T	T	T	T	T	T	T	T	T	T	T	T	T	T	T	T	T	T	T	T	T	T	T	T	T	T	T	T	T	T	T	T	T	T	T	T	T	T	T	T	C	T	T	T	T	T
solcap_snp_sl_42518	T	T	T	T	T	T	T	T	T	T	T	T	T	T	T	T	T	T	T	T	T	T	T	T	T	T	T	T	T	T	T	T	T	T	T	T	T	T	T	T	T	T	T	T	T	T	T	T	T
SGN-U602949_snp105683	C	C	C	C	C	C	C	C	C	C	C	C	C	C	C	C	C	C	C	C	C	C	C	C	C	C	C	C	C	C	C	C	C	C	C	C	C	C	C	C	C	C	C	G	C	C	C	C	C
CT232_snp229	T	T	T	T	T	T	T	T	T	T	T	T	T	T	T	T	T	T	T	T	T	T	T	T	T	T	T	T	T	T	T	T	T	T	T	T	T	T	T	T	T	T	T	C	T	T	T	T	T
SGN-U316347_T1535_snp219_solcap_snp_sl_42471	G	G	G	G	G	G	G	G	G	G	G	G	G	G	G	G	G	G	G	G	G	G	G	G	G	G	G	G	G	G	G	G	G	G	G	G	G	G	G	G	G	G	G	A	G	G	G	G	G
solcap_snp_sl_17138	T	T	T	T	T	T	T	T	T	T	T	T	T	T	T	T	T	T	T	T	T	T	T	T	T	T	T	T	T	T	T	T	T	T	T	T	T	T	T	T	T	T	T	T	T	T	T	T	T
solcap_snp_sl_42464	A	A	A	A	A	A	A	A	A	A	A	A	A	A	A	A	A	A	A	A	A	A	A	A	A	A	A	A	A	A	A	A	A	A	A	A	A	A	A	A	A	A	A	G	A	A	A	A	A
solcap_snp_sl_42463	T	T	T	T	T	T	T	T	T	T	T	T	T	T	T	T	T	T	T	T	T	T	T	T	T	T	T	T	T	T	T	T	T	T	T	T	T	T	T	T	T	T	T	G	T	T	T	T	T
solcap_snp_sl_42458	G	G	G	G	G	G	G	G	G	G	G	G	G	G	G	G	G	G	G	G	G	G	G	G	G	G	G	G	G	G	G	G	G	G	G	G	G	G	G	G	G	G	G	A	G	G	G	G	G
SGN-U318040_U146494_snp347_solcap_snp_sl_42453	C	C	C	C	C	C	C	C	C	C	C	C	C	C	C	C	C	C	C	C	C	C	C	C	C	C	C	C	C	C	C	C	C	C	C	C	C	C	C	C	C	C	C	A	C	C	C	C	C
CL016862-0447_solcap_snp_sl_42441	T	T	T	T	T	T	T	T	T	T	T	T	T	T	T	T	T	T	T	T	T	T	T	T	T	T	T	T	T	T	T	T	T	T	T	T	T	T	T	T	T	T	T	C	T	T	T	T	T
CL016862-0381	C	C	C	C	C	C	C	C	C	C	C	C	C	C	C	C	C	C	C	C	C	C	C	C	C	C	C	C	C	C	C	C	C	C	C	C	C	C	C	C	C	C	C	C	C	C	C	C	C
solcap_snp_sl_42411	C	C	C	C	C	C	C	C	C	C	C	C	C	C	C	C	C	C	C	C	C	C	C	C	C	C	C	C	C	C	C	C	C	C	C	C	C	C	C	C	C	C	C	T	C	C	C	C	C
solcap_snp_sl_12841	C	C	C	C	C	T	C	C	C	C	C	C	C	C	C	C	C	T	C	C	Y	Y	T	C	T	C	C	C	T	Y	Y	T	C	C	T	Y	T	T	Y	Y	T	T	T	C	Y	T	T	T	T
solcap_snp_sl_42383	T	T	T	T	T	T	T	T	T	T	T	T	T	T	T	T	T	T	T	T	T	T	T	T	T	T	T	T	T	T	T	T	T	T	T	T	T	T	T	T	T	T	T	C	T	T	T	T	T
solcap_snp_sl_42346	C	C	C	C	C	C	C	C	C	C	C	C	C	C	C	C	C	C	C	C	C	C	C	C	C	C	C	C	C	C	C	C	C	C	C	C	C	C	C	C	C	C	C	A	C	C	C	C	C
solcap_snp_sl_42334	C	C	C	C	C	C	C	C	C	C	C	C	C	C	C	C	C	C	C	C	C	C	C	C	C	C	C	C	C	C	C	C	C	C	C	C	C	C	C	C	C	C	C	T	C	C	C	C	C
SGN-U579280_snp65613	C	C	C	C	C	C	C	C	C	C	C	C	C	C	C	C	C	C	C	C	C	C	C	C	C	C	C	C	C	C	C	C	C	C	C	C	C	C	C	C	C	C	C	T	C	C	C	C	C
SGN-U579280_snp65625	G	G	G	G	G	G	G	G	G	G	G	G	G	G	G	G	G	G	G	G	G	G	G	G	G	G	G	G	G	G	G	G	G	G	G	G	G	G	G	G	G	G	G	A	G	G	G	G	G
SGN-U590370_snp65805	T	T	T	T	T	T	T	T	T	T	T	T	T	T	T	T	T	T	T	T	T	T	T	T	T	T	T	T	T	T	T	T	T	T	T	T	T	T	T	T	T	T	T	C	T	T	T	T	T
SGN-U590370_snp65811	G	G	G	G	G	G	G	G	G	G	G	G	G	G	G	G	G	G	G	G	G	G	G	G	G	G	G	G	G	G	G	G	G	G	G	G	G	G	G	G	G	G	G	A	G	G	G	G	G
SGN-U590370_snp65846	T	T	T	T	T	T	T	T	T	T	T	T	T	T	T	T	T	T	T	T	T	T	T	T	T	T	T	T	T	T	T	T	T	T	T	T	T	T	T	T	T	T	T	G	T	T	T	T	T
SGN-U590370_snp65887	G	G	G	G	G	G	G	G	G	G	G	G	G	G	G	G	G	G	G	G	G	G	G	G	G	G	G	G	G	G	G	G	G	G	G	G	G	G	G	G	G	G	G	A	G	G	G	G	G
SGN-U579752_snp292_solcap_snp_sl_42324	C	C	C	C	C	C	C	C	C	C	C	C	C	C	C	C	C	C	C	C	C	C	C	C	C	C	C	C	C	C	C	C	C	C	C	C	C	C	C	C	C	C	C	T	C	C	C	C	C
CL015021-0454	T	T	T	T	T	T	T	T	T	T	T	T	T	T	T	T	T	T	T	T	T	T	T	T	T	T	T	T	T	T	T	T	T	T	T	T	T	T	T	T	T	T	T	C	T	T	T	T	T
solcap_snp_sl_42301	G	G	G	G	G	G	G	G	G	G	G	G	G	G	G	G	G	G	G	G	G	G	G	G	G	G	G	G	G	G	G	G	G	G	G	G	G	G	G	G	G	G	G	K	G	G	G	G	G
solcap_snp_sl_50166	T	T	T	T	T	T	T	T	T	T	T	T	T	T	T	T	T	T	T	T	T	T	T	T	T	T	T	T	T	T	T	T	T	T	T	T	T	T	T	T	T	T	T	Y	T	T	T	T	T
CL015559-0344	C	C	C	C	C	C	C	C	C	C	C	C	C	C	C	C	C	C	C	C	C	C	C	C	C	C	C	C	C	C	C	C	C	C	C	C	C	C	C	C	C	C	C	Y	C	C	C	C	C
solcap_snp_sl_29920	A	A	A	A	A	A	A	A	A	A	A	A	A	A	A	A	A	A	A	A	A	A	A	A	A	A	A	A	A	A	A	A	A	A	A	A	A	A	A	A	A	A	A	R	A	A	A	A	A
solcap_snp_sl_50126	T	T	T	T	T	T	T	T	T	T	T	T	T	T	T	T	T	T	T	T	T	T	T	T	T	T	T	T	T	T	T	T	T	T	T	T	T	T	T	T	T	T	T	Y	T	T	T	T	T
solcap_snp_sl_29918	failed	failed	failed	failed	failed	failed	failed	failed	failed	failed	failed	failed	failed	failed	failed	failed	failed	failed	failed	failed	failed	failed	failed	failed	failed	failed	failed	failed	failed	failed	failed	failed	failed	failed	failed	failed	failed	failed	failed	failed	failed	failed	failed	failed	failed	failed	failed	failed	failed
CL015139-0364	T	T	T	T	T	T	T	T	T	T	T	T	T	T	T	T	T	T	T	T	T	T	T	T	T	T	T	T	T	T	T	T	T	T	T	T	T	T	T	T	T	T	T	Y	T	T	T	T	T
SGN-U572314_snp1007_solcap_snp_sl_29914	A	A	A	A	A	A	A	A	A	A	A	A	A	A	A	A	A	A	A	A	A	A	A	A	A	A	A	A	A	A	A	A	A	A	A	A	A	A	A	A	A	A	A	R	A	A	A	A	A
solcap_snp_sl_50066	C	C	C	C	C	C	C	C	C	C	C	C	C	C	C	C	C	C	C	C	C	C	C	C	C	C	C	C	C	C	C	C	C	C	C	C	C	C	C	C	C	C	C	Y	C	C	C	C	C
solcap_snp_sl_50060	T	T	T	T	T	T	T	T	T	T	T	T	T	T	T	T	T	T	T	T	T	T	T	T	T	T	T	T	T	T	T	T	T	T	T	T	T	T	T	T	T	T	T	K	T	T	T	T	T
solcap_snp_sl_50058	G	G	G	G	G	G	G	G	G	G	G	G	G	G	G	G	G	G	G	G	G	G	G	G	G	G	G	G	G	G	G	G	G	G	G	G	G	G	G	G	G	G	G	R	G	G	G	G	G
solcap_snp_sl_29911	G	G	G	G	G	G	G	G	G	G	G	G	G	G	G	G	G	G	G	G	G	G	G	G	G	G	G	G	G	G	G	G	G	G	G	G	G	G	G	G	G	G	G	G	G	G	G	G	G
solcap_snp_sl_50055	A	A	A	A	A	A	A	A	A	A	A	A	A	A	A	A	A	A	A	A	A	A	A	A	A	A	A	A	A	A	A	A	A	A	A	A	A	A	A	A	A	A	A	R	A	A	A	A	A
solcap_snp_sl_29905	T	T	T	T	T	T	T	T	T	T	T	T	T	T	T	T	T	T	T	T	T	T	T	T	T	T	T	T	T	T	T	T	T	T	T	T	T	T	T	T	T	T	T	T	T	T	T	T	T
CL009217-0844	C	C	C	C	C	C	C	C	C	C	C	C	C	C	C	C	C	C	C	C	C	C	C	C	C	C	C	C	C	C	C	C	C	C	C	C	C	C	C	C	C	C	C	C	C	C	C	C	C
SL10924_758_CL009217-0735	A	A	C	A	A	A	A	A	A	A	A	A	A	A	A	A	A	A	A	A	A	A	A	A	A	A	A	A	A	M	A	A	A	A	M	A	M	M	M	A	C	A	A	M	M	M	M	A	A
solcap_snp_sl_50024	C	C	C	C	C	C	C	C	C	C	C	C	C	C	C	C	C	C	C	C	C	C	C	C	C	C	C	C	C	C	C	C	C	C	C	C	C	C	C	C	C	C	C	Y	C	C	C	C	C
solcap_snp_sl_36297	G	G	G	G	G	G	G	G	G	G	G	G	G	G	G	G	G	G	G	G	G	G	G	G	G	G	G	G	G	G	G	G	G	G	G	G	G	G	G	G	G	G	G	K	G	G	G	G	G
solcap_snp_sl_36294	A	A	A	A	A	A	A	A	A	A	A	A	A	A	A	A	A	A	A	A	A	A	A	A	A	A	A	A	A	A	A	A	A	A	A	A	A	A	A	A	A	A	A	A	A	A	A	A	A
solcap_snp_sl_67389	T	T	T	T	T	T	T	T	T	T	T	T	T	T	T	T	T	T	T	T	T	T	T	T	T	T	T	T	T	T	T	T	T	T	T	T	T	T	T	T	T	T	T	T	T	T	T	T	T
solcap_snp_sl_67361	G	G	G	G	G	G	G	G	G	G	G	G	G	G	G	G	G	G	G	G	G	G	G	G	G	G	G	G	G	G	G	G	G	G	G	G	G	G	G	G	G	G	G	K	G	G	G	G	G
solcap_snp_sl_36287	C	C	C	C	C	C	C	C	C	C	C	C	C	C	C	C	C	C	C	C	C	C	C	C	C	C	C	C	C	C	C	C	C	C	C	C	C	C	C	C	C	C	C	Y	C	C	C	C	C
SGN-U584284_snp3414	C	C	C	C	C	C	C	C	C	C	C	C	C	C	C	C	C	C	C	C	C	C	C	C	C	C	C	C	C	C	C	C	C	C	C	C	C	C	C	C	C	C	C	C	C	C	C	C	C
solcap_snp_sl_10796	A	A	A	A	A	A	A	A	A	A	A	A	A	A	A	A	A	A	A	A	A	A	A	A	A	A	A	A	A	A	A	A	A	A	A	A	A	A	A	M	A	M	A	A	A	A	A	A	A
solcap_snp_sl_67311	T	T	T	T	T	T	T	T	T	T	T	T	T	T	T	T	T	T	T	T	T	T	T	T	T	T	T	T	T	T	T	T	T	T	T	T	T	T	T	T	T	T	T	T	T	T	T	T	T
SGN-U569505_snp29744	A	A	A	A	A	A	A	A	A	A	A	A	A	A	A	A	A	A	A	A	A	A	A	A	A	A	A	A	A	A	A	A	A	A	A	A	A	A	A	A	A	A	A	A	A	A	A	A	A
solcap_snp_sl_36274	T	T	T	T	T	T	T	T	T	T	T	T	T	T	T	T	T	T	T	T	T	T	T	T	T	T	T	T	T	T	T	T	T	T	T	T	T	T	T	T	T	T	T	T	T	T	T	T	T
solcap_snp_sl_36273	A	A	A	A	A	A	A	A	A	A	A	A	A	A	A	A	A	A	A	A	A	A	A	A	A	A	A	A	A	A	A	A	A	A	A	A	A	A	A	A	A	A	A	A	A	A	A	A	A
solcap_snp_sl_36271	C	C	C	C	C	C	C	C	C	C	C	C	C	C	C	C	C	C	C	C	C	C	C	C	C	C	C	C	C	C	C	C	C	C	C	C	C	C	C	C	C	C	C	C	C	C	C	C	C
solcap_snp_sl_67234	T	T	T	T	T	T	T	T	T	T	T	T	T	T	T	T	T	T	T	T	T	T	T	T	T	T	T	T	T	T	T	T	T	T	T	T	T	T	T	T	T	T	T	T	T	T	T	T	T
solcap_snp_sl_36265	T	T	T	T	T	T	T	T	T	T	T	T	T	T	T	T	T	T	T	T	T	T	T	T	T	T	T	T	T	T	T	T	T	T	T	T	T	T	T	T	T	T	T	T	T	T	T	T	T
solcap_snp_sl_36264	A	A	A	A	A	A	A	A	A	A	A	A	A	A	A	A	A	A	A	A	A	A	A	A	A	A	A	A	A	A	A	A	A	A	A	A	A	A	A	A	A	A	A	A	A	A	A	A	A
solcap_snp_sl_67198	C	C	C	C	C	C	C	C	C	C	C	C	C	C	C	C	C	C	C	C	C	C	C	C	C	C	C	C	C	C	C	C	C	C	C	C	C	C	C	C	C	C	C	C	C	C	C	C	C
solcap_snp_sl_67184	T	T	T	T	T	T	T	T	T	T	T	T	T	T	T	T	T	T	T	T	T	T	T	T	T	T	T	T	T	T	T	T	T	T	T	T	T	T	T	T	T	T	T	T	T	T	T	T	T
solcap_snp_sl_67183	C	C	C	C	C	C	C	C	T	C	C	C	C	C	C	C	C	C	C	C	C	C	C	C	C	C	C	C	C	C	C	C	C	C	C	C	C	C	C	C	C	C	C	C	C	C	C	C	C
solcap_snp_sl_36259	C	C	C	C	C	C	C	C	C	C	C	C	C	C	C	C	C	C	C	C	C	C	C	C	C	C	C	C	C	C	C	C	C	C	C	C	C	C	C	C	C	C	C	C	C	C	C	C	C
solcap_snp_sl_36258	T	T	T	T	T	T	T	T	T	T	T	T	T	T	T	T	T	T	T	T	T	T	T	T	T	T	T	T	T	T	T	T	T	T	T	T	T	T	T	T	T	T	T	T	T	T	T	T	T
solcap_snp_sl_67138	A	A	A	A	A	A	A	A	A	A	A	A	A	A	A	A	A	A	A	A	A	A	A	A	A	A	A	A	A	A	A	A	A	A	A	A	A	A	A	A	A	A	A	A	A	A	A	A	A
solcap_snp_sl_36253	C	C	C	C	C	C	C	C	C	C	C	C	C	C	C	C	C	C	C	C	C	C	C	C	C	C	C	C	C	C	C	C	C	C	C	C	C	C	C	C	C	C	C	C	C	C	C	C	C
solcap_snp_sl_67119	G	G	G	G	G	G	G	G	G	G	G	G	G	G	G	G	G	G	G	G	G	G	G	G	G	G	G	G	G	G	G	G	G	G	G	G	G	G	G	G	G	G	G	S	G	G	G	G	G
solcap_snp_sl_67117	C	C	C	C	C	C	C	C	C	C	C	C	C	C	C	C	C	C	C	C	C	C	C	C	C	C	C	C	C	C	C	C	C	C	C	C	C	C	C	C	C	C	C	Y	C	C	C	C	C
solcap_snp_sl_36245	C	C	C	C	C	C	C	C	C	C	C	C	C	C	C	C	C	C	C	C	C	C	C	C	C	C	C	C	C	C	C	C	C	C	C	C	C	C	C	C	C	C	C	C	C	C	C	C	C
solcap_snp_sl_36243	G	G	G	G	G	G	G	G	G	G	G	G	G	G	G	G	G	G	G	G	G	G	G	G	G	G	G	G	G	G	G	G	G	G	G	G	G	G	G	G	G	G	G	G	G	G	G	G	G
solcap_snp_sl_10759	C	C	C	C	C	C	C	C	C	C	C	C	C	C	C	C	C	C	C	C	C	C	C	C	C	C	C	C	C	M	C	C	C	C	M	C	C	M	M	M	M	C	C	C	C	M	M	C	C
CL017630-0504	C	C	C	C	C	C	C	C	C	C	C	C	C	C	C	C	C	C	C	C	C	C	C	C	C	C	C	C	C	C	C	C	C	C	C	C	C	C	C	C	C	C	C	C	C	C	C	C	C
solcap_snp_sl_36241	T	T	T	T	T	T	T	T	T	T	T	T	T	T	T	T	T	T	T	T	T	T	T	T	T	T	T	T	T	T	T	T	T	T	T	T	T	T	T	T	T	T	T	T	T	T	T	T	T
solcap_snp_sl_36238	C	C	C	C	C	C	C	C	C	C	C	C	C	C	C	C	C	C	C	C	C	C	C	C	C	C	C	C	C	C	C	C	C	C	C	C	C	C	C	C	C	C	C	C	C	C	C	C	C
solcap_snp_sl_67090	C	C	C	C	C	C	C	C	C	C	C	C	C	C	C	C	C	C	C	C	C	C	C	C	C	C	C	C	C	C	C	C	C	C	C	C	C	C	C	C	C	C	C	M	C	C	C	C	C
fw2.2_283_b	G	G	G	G	G	G	G	G	G	G	G	G	G	G	G	G	G	G	G	G	G	G	G	G	G	G	G	G	G	G	G	G	G	G	G	G	G	G	G	G	G	G	G	G	G	G	G	G	G
CL017715-0231	C	C	C	C	C	C	C	C	C	C	C	C	C	C	C	C	C	C	C	C	C	C	C	C	C	C	C	C	C	C	C	C	C	C	C	C	C	C	C	C	C	C	C	C	C	C	C	C	C
CL017715-0287_solcap_snp_sl_67052	G	G	G	G	G	G	G	G	G	G	G	G	G	G	G	G	G	G	G	G	G	G	G	G	G	G	G	G	G	G	G	G	G	G	G	G	G	G	G	G	G	G	G	R	G	G	G	G	G
solcap_snp_sl_36232	T	T	T	T	T	T	T	T	T	T	T	T	T	T	T	T	T	T	T	T	T	T	T	T	T	T	T	T	T	T	T	T	T	T	T	T	T	T	T	T	T	T	T	Y	T	T	T	T	T
solcap_snp_sl_36231	A	A	A	A	A	A	A	A	A	A	A	A	A	A	A	A	A	A	A	A	A	A	A	A	A	A	A	A	A	A	A	A	A	A	A	A	A	A	A	A	A	A	A	A	A	A	A	A	A
ABA1_2029_solcap_snp_sl_67036	A	A	A	A	A	A	A	A	A	A	A	A	A	A	A	A	A	A	A	A	A	A	A	A	A	A	A	A	A	A	A	A	A	A	A	A	A	A	A	A	A	A	A	R	A	A	A	A	A
ZDS_611	T	T	T	T	T	T	T	T	T	T	T	T	T	T	T	T	T	T	T	T	T	T	T	T	T	T	T	T	T	T	T	T	T	T	T	T	T	T	T	T	T	T	T	T	T	T	T	T	T
ABA1_Promoter_SNP2_solcap_snp_sl_67034	T	T	T	T	T	T	T	T	T	T	T	T	T	T	T	T	T	T	T	T	T	T	T	T	T	T	T	T	T	T	T	T	T	T	T	T	T	T	T	T	T	T	T	Y	T	T	T	T	T
solcap_snp_sl_67032	A	A	A	A	A	A	A	A	A	A	A	A	A	A	A	A	A	A	A	A	A	A	A	A	A	A	A	A	A	A	A	A	A	A	A	A	A	A	A	A	A	A	A	M	A	A	A	A	A
ABA1_Promoter_SNP1	C	C	C	C	C	C	C	C	C	C	C	C	C	C	C	C	C	C	C	C	C	C	C	C	C	C	C	C	C	C	C	C	C	C	C	C	C	C	C	C	C	C	C	Y	C	C	C	C	C
solcap_snp_sl_36224	T	T	C	Y	C	C	T	C	C	T	T	C	C	T	C	C	C	C	T	C	Y	T	T	T	Y	T	Y	T	T	Y	T	T	Y	Y	Y	Y	Y	Y	Y	T	Y	T	T	C	T	Y	Y	T	T
CL017806-0320_solcap_snp_sl_67017	T	T	T	T	T	T	T	T	T	T	T	T	T	T	T	T	T	T	T	T	T	T	T	T	T	T	T	T	T	T	T	T	T	T	T	T	T	T	T	T	T	T	T	Y	T	T	T	T	T
solcap_snp_sl_67010	C	C	C	C	C	C	C	C	C	C	C	C	C	C	C	C	C	C	C	C	C	C	C	C	C	C	C	C	C	C	C	C	C	C	C	C	C	C	C	C	C	C	C	S	C	C	C	C	C
solcap_snp_sl_36221	T	T	T	T	T	T	T	T	T	T	T	T	T	T	T	T	T	T	T	T	T	T	T	T	T	T	T	T	T	T	T	T	T	T	T	T	T	T	T	T	T	T	T	Y	T	T	T	T	T
solcap_snp_sl_36220	C	C	C	C	C	C	C	C	C	C	C	C	C	C	C	C	C	C	C	C	C	C	C	C	C	C	C	C	C	C	C	C	C	C	C	C	C	C	C	C	C	C	C	C	C	C	C	C	C
solcap_snp_sl_66965	G	G	G	G	G	G	G	G	G	G	G	G	G	G	G	G	G	G	G	G	G	G	G	G	G	G	G	G	G	G	G	G	G	G	G	G	G	G	G	G	G	G	G	R	G	G	G	G	G
solcap_snp_sl_66955	A	A	A	A	A	A	A	A	A	A	A	A	A	A	A	A	A	A	A	A	A	A	A	A	A	A	A	A	A	A	A	A	A	A	A	A	A	A	A	A	A	A	A	R	A	A	A	A	A
solcap_snp_sl_66953	A	A	A	A	A	A	A	A	A	A	A	A	A	A	A	A	A	A	A	A	A	A	A	A	A	A	A	A	A	A	A	A	A	A	A	A	A	A	A	A	A	A	A	R	A	A	A	A	A
solcap_snp_sl_66951	T	T	T	T	T	T	T	T	T	T	T	T	T	T	T	T	T	T	T	T	T	T	T	T	T	T	T	T	T	T	T	T	T	T	T	T	T	T	T	T	T	T	T	W	T	T	T	T	T
solcap_snp_sl_36203	C	C	C	C	C	C	C	C	C	C	C	C	C	C	C	C	C	C	C	C	C	C	C	C	C	C	C	C	C	C	C	C	C	C	C	C	C	C	C	C	C	C	C	C	C	C	C	C	C
solcap_snp_sl_36202	C	C	C	C	C	C	C	C	C	C	C	C	C	C	C	C	C	C	C	C	C	C	C	C	C	C	C	C	C	C	C	C	C	C	C	C	C	C	C	C	C	C	C	Y	C	C	C	C	C
solcap_snp_sl_36201	T	T	T	T	T	T	T	T	T	T	T	T	T	T	T	T	T	T	T	T	T	T	T	T	T	T	T	T	T	T	T	T	T	T	T	T	T	T	T	T	T	T	T	T	T	T	T	T	T
solcap_snp_sl_66904	G	G	G	G	G	G	G	G	G	G	G	G	G	G	G	G	G	G	G	G	G	G	G	G	G	G	G	G	G	G	G	G	G	G	G	G	G	G	G	G	G	G	G	R	G	G	G	G	G
solcap_snp_sl_66878	T	T	T	T	T	T	T	T	T	T	T	T	T	T	T	T	T	T	T	T	T	T	T	T	T	T	T	T	T	T	T	T	T	T	T	T	T	T	T	T	T	T	T	Y	T	T	T	T	T
solcap_snp_sl_21867	G	G	G	G	G	G	G	G	G	G	G	G	G	G	G	G	G	G	G	G	G	R	G	G	G	G	G	G	A	G	R	A	R	G	R	G	R	G	G	G	R	R	A	R	G	R	G	G	R
solcap_snp_sl_21866	G	G	G	G	G	G	G	G	G	G	G	G	G	G	G	G	G	G	G	G	G	R	G	G	G	G	G	G	A	G	R	A	R	G	R	G	R	G	G	G	R	R	A	R	G	R	G	G	R
solcap_snp_sl_36193	failed	A	A	A	A	failed	A	A	failed	A	A	A	failed	A	A	A	A	A	A	A	A	R	A	A	A	A	A	A	G	A	R	G	R	A	R	A	R	A	A	A	R	R	G	R	A	R	A	A	R
solcap_snp_sl_36192	G	G	G	G	S	G	G	G	G	G	G	G	G	G	G	G	G	G	G	G	G	S	G	G	G	G	G	G	C	G	S	C	S	G	S	G	S	G	G	G	S	S	C	S	G	S	G	failed	S
solcap_snp_sl_21864	G	G	G	G	G	G	G	G	G	G	G	G	G	G	G	G	G	G	G	G	G	R	G	G	G	G	G	G	A	G	R	A	R	G	R	G	R	G	G	G	R	R	A	G	G	R	G	G	R
solcap_snp_sl_21862	A	A	A	A	A	A	A	A	A	A	A	A	A	A	A	A	A	A	A	A	A	R	A	A	A	A	A	A	G	A	R	G	R	A	R	A	R	A	A	A	R	R	G	R	A	R	A	A	R
solcap_snp_sl_36189	T	T	T	T	T	T	T	T	T	T	T	T	T	T	T	T	T	T	T	T	T	T	T	T	T	T	T	T	T	T	T	T	T	T	T	T	T	T	T	T	T	T	T	Y	T	T	T	T	T
solcap_snp_sl_36188	A	A	A	A	A	A	A	A	A	A	A	A	A	A	A	A	A	A	A	A	A	A	A	A	A	A	A	A	A	A	A	A	A	A	A	A	A	A	A	A	A	A	A	R	A	A	A	A	A
CL016371-0420	A	A	A	A	A	A	A	A	A	A	A	A	A	A	A	A	A	A	A	A	A	A	A	A	A	A	A	A	A	A	A	A	A	A	A	A	A	A	A	A	A	A	A	A	A	A	A	A	A
solcap_snp_sl_67596	A	A	A	A	A	A	A	A	A	A	A	A	A	A	A	A	A	A	A	A	A	A	A	A	A	A	A	A	A	A	A	A	A	A	A	A	A	A	A	A	A	A	A	R	A	A	A	A	A
SGN-U315914_C2_At5g67370_snp371	C	C	C	C	C	C	C	C	C	C	C	C	C	C	C	C	C	C	C	C	C	C	C	C	C	C	C	C	C	C	C	C	C	C	C	C	C	C	C	C	C	C	C	C	C	C	C	C	C
solcap_snp_sl_21971	T	T	T	T	T	T	T	T	T	T	T	T	T	T	T	T	T	T	T	T	T	T	C	C	Y	T	T	T	T	failed	T	Y	T	T	T	failed	failed	failed	T	Y	T	failed	T	T	T	T	failed	C	Y
solcap_snp_sl_21966	T	T	T	T	C	T	T	T	T	T	T	T	T	T	T	T	T	T	T	T	T	Y	C	C	Y	T	T	T	C	Y	Y	Y	Y	T	Y	Y	Y	Y	T	Y	Y	Y	Y	T	T	Y	Y	C	Y
solcap_snp_sl_67551	T	T	T	T	T	T	T	T	T	T	T	T	T	T	T	T	T	T	T	T	T	T	T	T	T	T	T	T	T	T	T	T	T	T	T	T	T	T	T	T	T	T	T	Y	T	T	T	T	T
solcap_snp_sl_58490	G	G	G	G	G	G	G	G	G	G	G	G	G	G	G	G	G	G	G	G	G	G	G	G	G	G	G	G	G	G	G	G	G	G	G	G	G	G	G	G	G	G	G	R	G	G	G	G	G
solcap_snp_sl_20064	A	A	A	A	A	A	A	A	A	A	A	A	A	A	A	A	A	A	A	A	A	A	A	A	A	A	A	A	A	A	A	R	A	A	A	A	R	A	A	A	A	R	R	A	A	A	A	A	R
solcap_snp_sl_20063	G	G	G	G	G	G	G	G	G	G	G	G	G	G	G	G	G	G	G	G	G	G	G	G	G	G	G	G	G	G	G	K	G	G	G	G	K	G	G	G	G	K	K	K	G	G	G	G	K
solcap_snp_sl_32404	T	T	T	T	T	T	T	T	T	T	T	T	T	T	T	T	T	T	T	T	T	T	T	T	T	T	T	T	T	T	T	T	T	T	T	T	T	T	T	T	T	T	T	T	T	T	T	T	T
solcap_snp_sl_58462	C	C	C	C	C	C	C	C	C	C	C	C	C	C	C	C	C	C	C	C	C	C	C	C	C	C	C	C	C	C	C	C	C	C	C	C	C	C	C	C	C	C	C	Y	C	C	C	C	C
solcap_snp_sl_58447	G	G	G	G	A	G	G	G	G	G	G	G	G	G	G	G	G	G	G	G	G	R	G	G	G	G	G	G	A	G	R	R	R	G	R	G	R	G	G	G	R	A	A	R	G	R	G	R	A
solcap_snp_sl_20052	G	G	G	G	T	G	G	G	G	G	G	G	G	G	G	G	G	G	G	G	G	K	G	G	G	G	G	G	T	G	K	K	K	G	K	G	K	G	G	G	K	T	T	K	G	K	G	K	T
CL017436-0294	C	C	C	C	T	C	C	C	C	C	C	C	C	C	C	C	C	C	C	C	C	Y	C	C	C	C	C	C	T	C	Y	Y	Y	C	Y	C	Y	C	C	C	Y	T	T	C	C	Y	C	Y	T
CL017436-0232	G	G	G	G	G	G	G	G	G	G	G	G	G	G	G	G	G	G	G	G	G	G	G	G	G	G	G	G	G	G	G	G	G	G	G	G	G	G	G	G	G	G	G	G	G	G	G	G	G
solcap_snp_sl_20051	G	G	G	G	A	G	G	G	G	G	G	G	G	G	G	G	G	G	G	G	G	R	G	G	G	G	G	G	A	G	R	R	R	G	R	G	R	G	G	G	R	A	A	G	G	R	G	R	A
solcap_snp_sl_20049	C	C	C	C	T	C	C	C	C	C	C	C	C	C	C	C	C	C	C	C	C	Y	C	C	C	C	C	C	T	C	Y	Y	Y	C	Y	C	Y	C	C	C	Y	T	T	Y	C	Y	C	Y	T
solcap_snp_sl_58414	T	T	T	T	T	T	T	T	T	T	T	T	T	T	T	T	T	T	T	T	T	T	T	T	T	T	T	T	T	T	T	T	T	T	T	T	T	T	T	T	T	T	T	Y	T	T	T	T	T
CL016576-0377	G	G	G	G	G	G	G	G	G	G	G	G	G	G	G	G	G	G	G	G	T	T	G	G	K	T	T	T	K	K	T	G	T	T	K	K	T	K	T	K	K	G	T	K	K	K	K	G	G
solcap_snp_sl_58389	G	G	G	G	G	G	G	G	G	G	G	G	G	G	G	G	G	G	G	G	G	G	G	G	G	G	G	G	G	G	G	G	G	G	G	G	G	G	G	G	G	G	G	G	G	G	G	G	G
solcap_snp_sl_20044	C	C	C	C	T	C	C	C	C	C	C	C	C	C	C	C	C	C	C	C	Y	Y	C	C	C	C	C	Y	T	C	Y	Y	Y	C	Y	C	Y	C	C	C	Y	T	T	Y	C	Y	C	Y	T
solcap_snp_sl_32389	T	T	T	T	T	T	T	T	T	T	T	T	T	T	T	T	T	T	T	T	T	T	T	T	T	T	T	T	T	T	T	T	T	T	T	T	T	T	T	T	T	T	T	Y	T	T	T	T	T
CL016196-0121	T	T	T	T	T	T	T	T	T	T	T	T	T	T	T	T	T	T	T	T	T	T	T	T	T	T	T	T	T	T	T	T	T	T	T	T	T	T	T	T	T	T	T	Y	T	T	T	T	T
SGN-U313919_snp500	T	T	T	T	T	T	T	T	T	T	T	T	T	T	T	T	T	T	T	T	T	T	T	T	T	T	T	T	T	T	T	T	T	T	T	T	T	T	T	T	T	T	T	Y	T	T	T	T	T
solcap_snp_sl_48037	T	T	T	T	T	T	T	T	T	T	T	T	T	T	T	T	T	T	T	T	T	T	T	T	T	T	T	T	T	T	T	T	T	T	T	T	T	T	T	T	T	T	T	Y	T	T	T	T	T
solcap_snp_sl_29357	C	C	C	C	C	C	C	C	C	C	C	C	C	C	C	C	C	C	C	C	C	C	C	C	C	C	C	C	C	C	C	C	C	C	C	C	C	C	C	C	C	C	C	C	C	C	C	C	C
solcap_snp_sl_48033	T	T	T	T	T	T	T	T	T	T	T	T	T	T	T	T	T	T	T	T	T	T	T	T	T	T	T	T	T	T	T	T	T	T	T	T	T	T	T	T	T	T	T	Y	T	T	T	T	T
solcap_snp_sl_29351	C	C	C	C	C	C	C	C	C	C	C	C	C	C	C	C	C	C	C	C	Y	C	C	C	C	C	C	Y	C	C	C	Y	C	C	C	C	Y	C	C	C	C	C	Y	Y	C	C	C	C	C
solcap_snp_sl_47977	G	G	G	G	G	G	G	G	G	G	G	G	G	G	G	G	G	G	G	G	G	G	G	G	G	G	G	G	G	G	G	G	G	G	G	G	G	G	G	G	G	G	G	K	G	G	G	G	G
CL016534-0109	C	C	C	C	C	C	C	C	C	C	C	C	C	C	C	C	C	C	C	C	C	C	C	C	C	C	C	C	C	C	C	C	C	C	C	C	C	C	C	C	C	C	C	C	C	C	C	C	C
solcap_snp_sl_29349	G	G	G	G	G	G	G	G	G	G	G	G	G	G	G	G	G	G	G	G	G	G	G	G	G	G	G	G	G	G	G	G	G	G	G	G	G	G	G	G	G	G	G	G	G	G	G	G	G
solcap_snp_sl_47942	G	G	G	G	G	G	G	G	G	G	G	G	G	G	G	G	G	G	G	G	G	G	G	G	G	G	G	G	G	G	G	G	G	G	G	G	G	G	G	G	G	G	G	R	G	G	G	G	G
CL017391-0390	T	T	T	T	T	T	T	T	T	T	T	T	T	T	T	T	T	T	T	T	T	T	T	T	T	T	T	T	T	T	T	T	T	T	T	T	T	T	T	T	T	T	T	Y	T	T	T	T	T
solcap_snp_sl_47897	C	C	C	C	C	C	C	C	C	C	C	C	C	C	C	C	C	C	C	C	C	C	C	C	C	C	C	C	C	C	C	C	C	C	C	C	C	C	C	C	C	C	C	Y	C	C	C	C	C
solcap_snp_sl_47885	G	G	G	G	G	G	G	G	G	G	G	G	G	G	G	G	G	G	G	G	G	G	G	G	G	G	G	G	G	G	G	G	G	G	G	G	G	G	G	G	G	G	G	R	G	G	G	G	G
solcap_snp_sl_47880	T	T	T	T	T	T	T	T	T	T	T	T	T	T	T	T	T	T	T	T	T	T	T	T	T	T	T	T	T	T	T	T	T	T	T	T	T	T	T	T	T	T	T	K	T	T	T	T	T
solcap_snp_sl_63048	A	A	A	A	A	A	A	A	A	A	A	A	A	A	A	A	A	A	A	A	R	A	A	A	A	A	R	R	A	R	A	A	A	A	A	A	A	A	A	A	R	R	A	G	A	A	A	A	R
CL016802-0675	T	T	T	T	T	T	T	T	T	T	T	T	T	T	T	T	T	T	T	T	T	T	T	T	T	T	T	T	T	T	T	T	T	T	T	T	T	T	T	T	T	Y	T	C	T	T	T	T	Y
solcap_snp_sl_63084	G	G	G	G	G	G	G	G	G	G	G	G	G	G	G	G	G	G	G	G	G	G	G	G	G	G	G	G	G	G	G	G	G	G	G	G	G	G	G	G	G	G	G	A	G	G	G	G	G
solcap_snp_sl_25015	C	C	C	C	C	C	C	C	C	C	C	C	C	C	C	C	C	C	C	C	C	C	C	C	C	C	C	C	C	C	C	C	C	C	C	C	C	C	C	C	C	C	C	C	C	C	C	C	C
CL017202-0450_solcap_snp_sl_63109	T	T	T	T	T	T	T	T	T	T	T	T	T	T	T	T	T	T	T	T	T	T	T	T	T	T	T	T	T	T	T	T	T	T	T	T	T	T	T	T	T	Y	T	C	T	T	T	T	Y
CL017080-0343	G	G	G	G	G	G	G	G	G	G	G	G	G	G	G	G	G	G	G	G	R	G	G	G	G	G	R	R	G	R	G	G	G	G	G	G	G	G	G	G	R	G	G	G	G	G	G	G	G
CL017080-0223	T	T	T	T	T	T	T	T	T	T	T	T	T	T	T	T	T	T	T	T	T	T	T	T	T	T	T	T	T	T	T	T	T	T	T	T	T	T	T	T	T	Y	T	C	T	T	T	T	Y
solcap_snp_sl_63114	A	A	A	A	A	A	A	A	A	A	A	A	A	A	A	A	A	A	A	A	A	A	A	A	A	A	A	A	A	A	A	A	A	A	A	A	A	A	A	A	R	R	A	G	A	A	A	A	R
CL016925-0828	A	A	A	A	A	A	A	A	A	A	A	A	A	A	A	A	A	A	A	A	A	A	A	A	A	A	A	A	A	A	A	A	A	A	A	A	A	A	A	A	A	M	A	C	A	A	A	A	M
solcap_snp_sl_63129	G	G	G	G	G	G	G	G	G	G	G	G	G	G	G	G	G	G	G	G	R	G	G	G	G	G	R	R	G	R	G	G	G	G	G	G	G	G	G	G	G	R	G	A	G	G	G	G	R
solcap_snp_sl_63134	A	A	A	A	A	A	A	A	A	A	A	A	A	A	A	A	A	A	A	A	A	A	A	A	A	A	A	A	A	A	A	A	A	A	A	A	A	A	A	A	A	R	A	G	A	A	A	A	R
solcap_snp_sl_34398	G	A	G	R	G	G	G	G	G	G	G	A	G	G	G	A	G	G	G	G	G	G	G	G	G	G	G	G	G	G	G	G	G	G	G	G	G	G	R	G	G	G	G	G	G	G	G	G	G
solcap_snp_sl_34404	G	G	G	G	G	G	G	G	G	G	G	G	G	G	G	G	G	G	G	G	G	G	G	G	G	G	G	G	G	G	G	G	G	G	G	G	G	G	G	G	G	G	G	G	G	G	G	G	G
solcap_snp_sl_63167	T	T	T	T	T	T	T	T	T	T	T	T	T	T	T	T	T	T	T	T	T	T	T	T	T	T	T	T	T	T	T	T	T	T	T	T	T	T	T	T	T	Y	T	C	T	T	T	T	Y
solcap_snp_sl_63184	T	T	T	T	T	T	T	T	T	T	T	T	T	T	T	T	T	T	T	T	Y	T	T	T	T	T	Y	Y	T	Y	T	T	T	T	T	T	T	T	T	T	Y	T	T	C	T	T	T	T	T
solcap_snp_sl_9663	A	G	A	R	A	A	A	A	A	A	A	G	A	A	A	G	A	A	A	A	A	A	A	A	A	A	A	A	A	A	A	A	A	A	A	A	R	A	R	A	R	R	A	G	A	A	A	A	G
solcap_snp_sl_63211	G	G	G	G	G	G	G	G	G	G	G	G	G	G	G	G	G	G	G	G	G	G	G	G	G	G	G	G	G	G	G	G	G	G	G	G	G	G	G	G	R	G	G	A	G	G	G	G	G
solcap_snp_sl_21215	C	C	C	M	C	C	C	C	C	C	C	C	C	C	C	C	C	C	C	C	C	C	C	C	C	C	C	C	C	C	C	C	C	C	C	C	M	C	C	C	M	C	C	A	C	C	C	C	C
solcap_snp_sl_9666	G	G	G	R	G	G	G	G	G	G	G	G	G	G	G	G	G	G	G	G	G	G	G	G	G	G	G	G	G	G	G	G	G	G	G	G	R	G	G	G	R	G	G	A	G	G	G	G	G
solcap_snp_sl_9667	A	A	A	R	A	A	A	A	A	A	A	A	A	A	A	A	A	A	A	A	A	A	A	A	A	A	A	A	A	A	A	A	A	A	A	A	R	A	A	A	A	A	A	G	A	A	A	A	A
solcap_snp_sl_21216	A	A	A	R	A	A	A	A	A	A	A	A	A	A	A	A	A	A	A	A	A	A	A	A	A	A	A	A	A	A	A	A	A	A	A	A	R	A	A	A	R	A	A	G	A	A	A	A	A
solcap_snp_sl_63240	C	C	C	C	C	C	C	C	C	C	C	C	C	C	C	C	C	C	C	C	C	C	C	C	C	C	C	C	C	C	C	C	C	C	C	C	C	C	C	C	Y	C	C	T	C	C	C	C	C
solcap_snp_sl_9681	T	T	T	Y	T	T	T	T	T	T	T	T	T	T	T	T	T	T	T	T	T	T	C	T	T	T	T	T	T	T	T	Y	T	T	T	T	T	T	T	T	Y	Y	T	C	T	T	T	Y	C
solcap_snp_sl_63273	T	T	T	T	T	T	T	T	T	T	T	T	T	T	T	T	T	T	T	T	T	T	T	T	T	T	T	T	T	T	T	T	T	T	T	T	T	T	T	T	T	T	T	C	T	T	T	T	T
solcap_snp_sl_63285	A	A	A	A	A	A	A	A	A	A	A	A	A	A	A	A	A	A	A	A	A	A	A	A	A	A	A	A	A	A	A	A	A	A	A	A	A	A	A	A	A	A	A	T	A	A	A	A	A
solcap_snp_sl_63290	G	G	G	G	G	G	G	G	G	G	G	G	G	G	G	G	G	G	G	G	G	G	G	G	G	G	G	G	G	G	G	G	G	G	G	G	G	G	G	G	R	G	G	A	G	G	G	G	G
solcap_snp_sl_63301	A	A	A	A	A	A	A	A	A	A	A	A	A	A	A	A	A	A	A	A	A	A	A	A	A	A	A	A	A	A	A	A	A	A	A	A	A	A	A	A	M	A	A	C	A	A	A	A	A
CL016787-0272_solcap_snp_sl_63305	G	G	G	G	G	G	G	G	G	G	G	G	G	G	G	G	G	G	G	G	G	G	G	G	G	G	G	G	G	G	G	G	G	G	G	G	G	G	G	G	G	G	G	C	G	G	G	G	G
solcap_snp_sl_9683	A	A	A	R	G	A	G	G	G	G	G	A	G	A	G	A	G	A	G	G	G	G	G	G	G	G	G	G	G	R	G	G	G	G	G	G	G	G	R	G	G	G	G	G	G	G	R	G	R
solcap_snp_sl_63307	C	C	C	C	C	C	C	C	C	C	C	C	C	C	C	C	C	C	C	C	C	C	C	C	C	C	C	C	C	C	C	C	C	C	C	C	C	C	C	C	C	C	C	T	C	C	C	C	C
SGN-U569291_snp1086	C	C	C	C	C	C	C	C	C	C	C	C	C	C	C	C	C	C	C	C	C	C	C	C	C	C	C	C	C	C	C	C	C	C	C	C	C	C	C	C	Y	C	C	T	C	C	C	C	C
solcap_snp_sl_63356	T	T	T	T	T	T	T	T	T	T	T	T	T	T	T	T	T	T	T	T	T	T	T	T	T	T	T	T	T	T	T	T	T	T	T	T	T	T	T	T	Y	T	T	C	T	T	T	T	T
CL017347-0198	T	T	T	T	T	T	T	T	T	T	T	T	T	T	T	T	T	T	T	T	T	T	T	T	T	T	T	T	T	T	T	T	T	T	T	T	T	T	T	T	T	T	T	T	T	T	T	T	T
CL017347-0326_solcap_snp_sl_63360	T	T	T	T	T	T	T	T	T	T	T	T	T	T	T	T	T	T	T	T	T	T	T	T	T	T	T	T	T	T	T	T	T	T	T	T	T	T	T	T	T	T	T	A	T	T	T	T	T
solcap_snp_sl_63377	T	T	T	T	T	T	T	T	T	T	T	T	T	T	T	T	T	T	T	T	T	T	T	T	T	T	T	T	T	T	T	T	T	T	T	T	T	T	T	T	T	T	T	C	T	T	T	T	T
solcap_snp_sl_9689	C	C	C	C	C	C	C	C	C	C	C	C	C	C	C	C	C	C	C	C	Y	C	T	T	T	Y	Y	Y	T	Y	Y	T	C	C	Y	T	Y	T	Y	Y	Y	T	Y	C	Y	Y	Y	T	T
SL10790_382	A	A	A	A	A	A	A	A	A	A	A	A	A	A	A	A	A	A	A	A	R	A	G	G	G	R	R	R	G	R	R	G	A	A	R	G	R	G	R	R	G	G	R	A	R	R	R	G	G
solcap_snp_sl_15320	C	C	C	C	C	C	C	C	C	C	C	C	C	C	C	C	C	C	C	C	Y	C	T	T	T	Y	Y	Y	T	Y	Y	T	C	C	Y	T	T	T	Y	Y	T	T	Y	C	Y	Y	Y	T	T
solcap_snp_sl_9690	A	A	A	A	A	A	A	A	A	A	A	A	A	A	A	A	A	A	A	A	R	A	G	G	G	R	R	R	G	R	R	G	A	A	R	G	G	G	R	R	G	G	R	A	R	R	R	G	G
solcap_snp_sl_63391	A	A	A	A	A	A	A	A	A	A	A	A	A	A	A	A	A	A	A	A	W	A	T	T	T	W	W	W	T	W	W	T	A	A	W	T	T	T	failed	W	T	T	W	A	W	W	W	T	T
solcap_snp_sl_63402	A	A	A	A	A	A	A	A	A	A	A	A	A	A	A	A	A	A	A	A	A	A	A	A	A	A	A	A	A	A	A	A	A	A	A	A	A	A	A	A	R	A	A	A	A	A	A	A	A
CL017009-0461	T	T	T	T	T	T	T	T	T	T	T	T	T	T	T	T	T	T	T	T	T	T	T	T	T	T	T	T	T	T	T	T	T	T	T	T	T	T	T	T	Y	T	T	T	T	T	T	T	T
solcap_snp_sl_63452	A	A	A	A	A	A	A	A	A	A	A	A	A	A	A	A	A	A	A	A	A	A	A	A	A	A	A	A	A	A	A	A	A	A	A	A	A	A	A	A	A	A	A	A	A	A	A	A	A
solcap_snp_sl_9703	T	T	T	T	T	T	T	T	T	T	T	T	T	T	T	T	T	T	T	T	W	W	A	T	W	W	W	W	A	W	A	A	W	W	W	A	A	W	W	A	A	A	A	T	A	W	W	T	A
Ohase2_Promoter_SNP	C	C	C	C	C	C	C	C	C	C	C	C	C	C	C	C	C	C	C	C	C	C	C	C	C	C	C	C	C	C	C	C	C	C	C	C	C	C	C	C	C	C	C	C	C	C	C	C	C
Ohase2_623	C	C	C	C	C	C	C	C	C	C	C	C	C	C	C	C	C	C	C	C	C	C	C	C	C	C	C	C	C	C	C	C	C	C	C	C	C	C	C	C	C	C	C	C	C	C	C	C	C
solcap_snp_sl_63466	C	C	C	C	C	C	C	C	C	C	C	C	C	C	C	C	C	C	C	C	C	C	C	C	C	C	C	C	C	C	C	C	C	C	C	C	C	C	C	C	C	C	C	C	C	C	C	C	C
solcap_snp_sl_28569	C	C	C	C	C	C	C	C	C	C	C	C	C	C	C	C	C	C	C	C	C	C	C	C	C	C	C	C	C	C	C	C	C	C	C	C	C	C	C	C	C	C	C	C	C	C	C	C	C
SGN-U571958_snp135	G	G	G	G	G	G	G	G	G	G	G	G	G	G	G	G	G	G	G	G	G	G	G	G	G	G	G	G	G	G	G	G	G	G	G	G	G	G	G	G	G	G	G	G	G	G	G	G	G
solcap_snp_sl_28572	T	T	T	T	T	T	T	T	T	T	T	T	T	T	T	T	T	T	T	T	T	T	T	T	T	T	T	T	T	T	T	T	T	T	T	T	T	T	T	T	T	T	T	T	T	T	T	T	T
solcap_snp_sl_17581	T	T	T	T	T	T	T	T	T	T	T	T	T	T	T	T	T	T	T	T	T	T	T	T	T	T	T	T	T	T	T	T	T	T	T	T	T	T	T	T	T	T	T	T	T	T	T	T	T
solcap_snp_sl_28574	G	G	G	G	G	G	G	G	G	G	G	G	G	G	G	G	G	G	G	G	G	G	G	G	G	G	G	G	G	G	G	G	G	G	G	G	G	G	G	G	G	G	G	G	G	G	G	G	G
solcap_snp_sl_28577	T	T	T	T	T	T	T	T	T	T	T	T	T	T	T	T	T	T	T	T	T	T	T	T	T	T	T	T	T	T	T	T	T	T	T	T	T	T	T	T	T	T	T	T	T	T	T	T	T
solcap_snp_sl_28580	A	A	A	A	A	A	A	A	A	A	A	A	A	A	A	A	A	A	A	A	A	A	A	A	A	A	A	A	A	A	A	A	A	A	A	A	A	A	A	A	A	A	A	A	A	A	A	A	A
solcap_snp_sl_19643	C	C	C	C	C	C	C	C	C	C	C	C	C	C	C	C	C	C	C	C	C	C	C	A	C	C	C	C	C	M	C	C	C	C	C	C	C	M	M	C	M	A	M	C	C	C	M	C	A
solcap_snp_sl_55754	A	A	A	A	A	A	A	A	A	A	A	A	A	A	A	A	A	A	A	A	A	A	A	A	A	A	A	A	A	A	A	A	A	A	A	A	A	A	A	A	A	A	A	A	A	A	A	A	A
solcap_snp_sl_19652	G	G	G	G	G	G	G	G	G	G	G	G	G	G	G	G	G	G	G	G	G	G	G	G	G	G	G	G	G	G	G	G	G	G	G	G	G	G	G	G	G	G	G	G	G	G	G	G	G
solcap_snp_sl_24347	A	A	A	A	A	A	A	A	A	A	A	A	A	A	A	A	A	A	A	A	A	A	A	A	A	A	A	A	A	A	A	A	A	A	A	A	A	A	A	A	A	A	A	A	A	A	A	A	A
solcap_snp_sl_19654	T	T	T	T	T	T	T	T	T	T	T	T	T	T	T	T	T	T	T	T	T	T	T	T	T	T	T	T	T	T	T	T	T	T	T	T	T	T	T	T	T	T	T	T	T	T	T	T	T
SL10445_1141	T	T	T	T	T	T	T	T	T	T	T	T	T	T	T	T	T	T	T	T	T	T	T	T	T	T	T	T	T	T	T	T	T	T	T	T	T	T	T	T	T	T	T	T	T	T	T	T	T
solcap_snp_sl_19657	T	T	T	T	T	T	T	T	T	T	T	T	T	T	T	T	T	T	T	T	T	T	T	T	T	T	T	T	T	T	T	T	T	T	T	T	T	T	T	T	T	T	T	T	T	T	T	T	T
solcap_snp_sl_55790	A	A	A	A	A	A	A	A	A	A	A	A	A	A	A	A	A	A	A	A	A	A	A	A	A	A	A	A	A	A	A	A	A	A	A	A	A	A	A	A	A	A	A	A	A	A	A	A	A
solcap_snp_sl_19658	G	G	G	G	G	G	G	G	G	G	G	G	G	G	G	G	G	G	G	G	G	G	G	G	G	G	G	G	G	G	G	G	G	G	G	G	G	G	G	G	G	G	G	G	G	G	G	G	G
solcap_snp_sl_19659	G	G	G	G	G	G	G	G	G	G	G	G	G	G	G	G	G	G	G	G	G	G	G	G	G	G	G	G	G	G	G	G	G	G	G	G	G	G	G	G	G	G	G	G	G	G	G	G	G
solcap_snp_sl_19660	C	C	C	C	C	C	C	C	C	C	C	C	C	C	C	C	C	C	C	C	C	C	C	C	C	C	C	C	C	C	C	C	C	C	C	C	C	C	C	C	C	C	C	C	C	C	C	C	C
solcap_snp_sl_55812	G	G	G	G	G	G	G	G	G	G	G	G	G	G	G	G	G	G	G	G	G	G	G	G	G	G	G	G	G	G	G	G	G	G	G	G	G	G	G	G	G	G	G	G	G	G	G	G	G
solcap_snp_sl_19661	C	C	C	C	C	C	C	C	C	C	C	C	C	C	C	C	C	C	C	C	C	C	C	C	C	C	C	C	C	S	C	S	C	C	C	C	C	S	S	C	S	G	C	C	C	C	S	S	G
solcap_snp_sl_55125	C	C	C	C	C	C	C	C	C	C	C	C	C	C	C	C	C	C	C	C	C	C	C	C	C	C	C	C	C	C	C	C	C	C	C	C	C	C	C	C	C	C	C	C	C	C	C	C	C
CL015582-0113	G	G	G	G	G	G	G	G	G	G	G	G	G	G	G	G	G	G	G	G	G	G	G	G	G	G	G	G	G	G	G	G	G	G	G	G	G	G	G	G	R	G	G	G	G	G	G	G	G
solcap_snp_sl_14355	C	C	C	C	C	C	C	C	C	C	C	C	C	C	C	C	C	C	C	C	C	C	C	C	C	C	C	C	C	C	C	C	C	C	C	C	C	C	C	C	Y	C	C	C	C	C	C	C	C
solcap_snp_sl_14354	G	G	G	G	G	G	G	G	G	G	G	G	G	G	G	G	G	G	G	G	G	G	G	G	G	G	G	G	G	G	G	G	G	G	G	G	G	G	G	G	R	G	G	G	G	G	G	G	G
solcap_snp_sl_14353	C	C	C	C	C	C	C	C	C	C	C	C	C	C	C	C	C	C	C	C	C	C	C	C	C	C	C	C	C	C	C	C	C	C	C	C	C	C	C	C	Y	C	C	C	C	C	C	C	C
solcap_snp_sl_55107	G	G	G	G	G	G	G	G	G	G	G	G	G	G	G	G	G	G	G	G	G	G	G	G	G	G	G	G	G	G	G	G	G	G	G	G	G	G	G	G	K	G	G	G	G	G	G	G	G
CL015436-0159	T	T	T	T	T	T	T	T	T	T	T	T	T	T	T	T	T	T	T	T	T	T	T	T	T	T	T	T	T	T	T	T	T	T	T	T	T	T	T	T	T	T	T	T	T	T	T	T	T
CL015436-0072	G	G	G	G	G	G	G	G	G	G	G	G	G	G	G	G	G	G	G	G	G	G	G	G	G	G	G	G	G	G	G	G	G	G	G	G	G	G	G	G	G	G	G	G	G	G	G	G	G
solcap_snp_sl_55088	C	C	C	C	C	C	C	C	C	C	C	C	C	C	C	C	C	C	C	C	C	C	C	C	C	C	C	C	C	C	C	C	C	C	C	C	C	C	C	C	C	C	C	C	C	C	C	C	C
solcap_snp_sl_55072	C	C	C	C	C	C	C	C	C	C	C	C	C	C	C	C	C	C	C	C	C	C	C	C	C	C	C	C	C	C	C	C	C	C	C	C	C	C	C	C	Y	C	C	C	C	C	C	C	C
solcap_snp_sl_55055	T	T	T	T	T	T	T	T	T	T	T	T	T	T	T	T	T	T	T	T	T	T	T	T	T	T	T	T	T	T	T	T	T	T	T	T	T	T	T	T	Y	T	T	T	T	T	T	T	T
solcap_snp_sl_55054	T	T	T	T	T	T	T	T	T	T	T	T	T	T	T	T	T	T	T	T	T	T	T	T	T	T	T	T	T	T	T	T	T	T	T	T	T	T	T	T	T	T	T	T	T	T	T	T	T
solcap_snp_sl_55037	T	T	T	T	T	T	T	T	T	T	T	T	T	T	T	T	T	T	T	T	T	T	T	T	T	T	T	T	T	T	T	T	T	T	T	T	T	T	T	T	Y	T	T	T	T	T	T	T	T
solcap_snp_sl_55026	A	A	A	A	A	A	A	A	A	A	A	A	A	A	A	A	A	A	A	A	A	A	A	A	A	A	A	A	A	A	A	A	A	A	A	A	A	A	A	A	A	A	A	A	A	A	A	A	A
SGN-U572737_snp86	C	C	C	C	C	C	C	C	C	C	C	C	C	C	C	C	C	C	C	C	C	C	C	C	C	C	C	C	C	C	C	C	C	C	C	C	C	C	C	C	C	C	C	C	C	C	C	C	C
SGN-U564013_snp1820_solcap_snp_sl_55020	G	G	G	G	G	G	G	G	G	G	G	G	G	G	G	G	G	G	G	G	G	G	G	G	G	G	G	G	G	G	G	G	G	G	G	G	G	G	G	G	R	G	G	G	G	G	G	G	G
solcap_snp_sl_55002	T	T	T	T	T	T	T	T	T	T	T	T	T	T	T	T	T	T	T	T	T	T	T	T	T	T	T	T	T	T	T	T	T	T	T	T	T	T	T	T	Y	T	T	T	T	T	T	T	T
SGN-U567178_snp438_solcap_snp_sl_31828	A	A	A	A	A	A	A	A	A	A	A	A	A	A	A	A	A	A	A	A	A	A	A	A	A	A	A	A	A	A	A	A	A	A	A	A	A	A	A	A	R	A	A	A	A	A	A	A	A
solcap_snp_sl_31826	C	C	C	C	C	C	C	C	C	C	C	C	C	C	C	C	C	C	C	C	C	C	C	C	C	C	C	C	C	C	C	C	C	C	C	C	C	C	C	C	Y	C	C	C	C	C	C	C	C
solcap_snp_sl_31822	G	G	G	G	G	G	G	G	G	G	G	G	G	G	G	G	G	G	G	G	G	G	G	G	G	G	G	G	G	G	G	G	G	G	G	G	G	G	G	G	G	G	G	G	G	G	G	G	G
solcap_snp_sl_54950	G	G	G	G	G	G	G	G	G	G	G	G	G	G	G	G	G	G	G	G	G	G	G	G	G	G	G	G	G	G	G	G	G	G	G	G	G	G	G	G	G	G	G	G	G	G	G	G	G
solcap_snp_sl_31819	C	C	C	C	C	C	C	C	C	C	C	C	C	C	C	C	C	C	C	C	C	C	C	C	C	C	C	C	C	C	C	C	C	C	C	C	C	C	C	C	C	C	C	C	C	C	C	C	C
solcap_snp_sl_19514	A	A	A	A	A	A	A	A	A	A	A	A	A	A	A	A	A	A	A	A	R	R	A	A	R	A	R	R	A	A	G	R	R	R	R	R	R	R	failed	R	A	R	R	A	G	R	R	A	R
solcap_snp_sl_19513	A	A	A	A	failed	A	A	A	A	A	A	A	A	A	A	A	A	A	A	A	W	W	A	A	W	A	W	W	A	A	T	W	W	W	W	W	W	W	W	W	A	W	W	A	T	W	W	A	W
solcap_snp_sl_19511	A	A	A	A	A	A	A	A	A	A	A	A	A	A	A	A	A	A	A	A	A	A	A	A	A	A	A	A	A	A	T	A	A	A	A	A	A	A	A	A	A	A	A	A	T	A	A	A	A
solcap_snp_sl_31817	T	T	T	T	T	T	T	T	T	T	T	T	T	T	T	T	T	T	T	T	W	W	T	T	W	T	W	W	T	T	A	W	W	W	W	W	W	W	W	W	T	W	W	T	A	W	W	T	W
solcap_snp_sl_19509	C	C	C	C	C	C	C	C	C	C	C	C	C	C	C	C	C	C	C	C	S	S	C	C	S	C	S	S	C	C	G	S	S	S	S	S	S	S	S	S	C	S	S	C	G	S	S	C	S
solcap_snp_sl_19508	T	T	T	T	T	T	T	T	T	T	T	T	T	T	T	T	T	T	T	T	Y	Y	T	T	Y	T	T	T	T	Y	C	Y	Y	Y	Y	Y	Y	Y	C	Y	T	Y	Y	T	Y	Y	Y	T	Y
solcap_snp_sl_19504	G	G	G	G	G	G	G	G	G	G	G	G	G	G	G	G	G	G	G	G	G	G	G	G	G	G	G	G	G	G	G	G	G	G	G	G	G	G	G	G	G	G	G	G	G	G	G	G	G
solcap_snp_sl_6790	T	T	A	W	A	T	A	A	A	A	A	A	A	T	A	T	A	T	A	A	A	A	A	A	A	A	A	A	A	A	A	A	A	A	A	A	A	A	A	A	A	W	W	A	A	A	A	A	W
solcap_snp_sl_54887	T	T	T	T	T	T	T	T	T	T	T	T	T	T	T	T	T	T	T	T	T	T	T	T	T	T	T	T	T	T	T	T	T	T	T	T	T	T	T	T	T	T	T	T	T	T	T	T	T
CL016675-0084	A	A	A	A	A	A	A	A	A	A	A	A	A	A	A	A	A	A	A	A	A	A	A	A	A	A	A	A	A	A	A	A	A	A	A	A	A	A	A	A	A	M	A	A	A	A	A	A	M
CL016675-0242	C	C	C	C	C	C	C	C	C	C	C	C	C	C	C	C	C	C	C	C	C	C	C	C	C	C	C	C	C	C	C	C	C	C	C	C	C	C	C	C	C	C	C	C	C	C	C	C	C
solcap_snp_sl_41324	T	T	T	T	T	T	T	T	T	T	T	T	T	T	T	T	T	T	T	T	T	T	T	T	T	T	T	T	T	T	T	T	T	T	T	T	T	T	T	T	T	T	T	T	T	T	T	T	T
solcap_snp_sl_27094	C	C	C	C	C	C	C	C	C	C	C	C	C	C	C	C	C	C	C	C	C	C	C	C	C	C	C	C	C	C	C	C	C	C	C	C	C	C	C	C	C	C	C	C	C	C	C	C	C
solcap_snp_sl_1599	C	C	A	M	A	C	A	A	A	A	A	A	A	C	A	C	A	C	A	A	A	A	A	A	A	A	A	A	A	A	A	A	A	A	A	A	A	A	A	A	A	M	M	A	A	A	A	A	M
solcap_snp_sl_41353	T	T	T	T	T	T	T	T	T	T	T	T	T	T	T	T	T	T	T	T	T	T	T	T	T	T	T	T	T	T	T	T	T	T	T	T	T	T	T	T	T	T	T	T	T	T	T	T	T
SGN-U585791_snp124_solcap_snp_sl_41379	G	G	G	G	G	G	G	G	G	G	G	G	G	G	G	G	G	G	G	G	G	G	G	G	G	G	G	G	G	G	G	G	G	G	G	G	G	G	G	G	G	G	G	G	G	G	G	G	G
solcap_snp_sl_27099	G	G	G	G	G	G	G	G	G	G	G	G	G	G	G	G	G	G	G	G	G	G	G	G	G	G	G	G	G	G	G	G	G	G	G	G	G	G	G	G	G	G	G	G	G	G	G	G	G
PSY1_Promoter_SNP1	G	G	G	G	G	G	G	G	G	G	G	G	G	G	G	G	G	G	G	G	G	G	G	G	G	G	G	G	G	G	G	G	G	G	G	G	G	G	G	G	G	G	G	G	G	G	G	G	G
SGN-U314429_snp100	G	G	G	G	G	G	G	G	G	G	G	G	G	G	G	G	G	G	G	G	G	G	G	G	G	G	G	G	G	G	G	G	G	G	G	G	G	G	G	G	G	G	G	G	G	G	G	G	G
solcap_snp_sl_41384	A	A	A	A	A	A	A	A	A	A	A	A	A	A	A	A	A	A	A	A	A	A	A	A	A	A	A	A	A	A	A	A	A	A	A	A	A	A	A	A	A	A	A	A	A	A	A	A	A
Psy1_250_b	C	C	C	C	C	C	C	C	C	C	C	C	C	C	C	C	C	C	C	C	C	C	C	C	C	C	C	C	C	C	C	C	C	C	C	C	C	C	C	C	C	C	C	C	C	C	C	C	C
solcap_snp_sl_41389	T	T	T	T	T	T	T	T	T	T	T	T	T	T	T	T	T	T	T	T	T	T	T	T	T	T	T	T	T	T	T	T	T	T	T	T	T	T	T	T	T	T	T	T	T	T	T	T	T
solcap_snp_sl_23192	G	G	G	G	A	G	G	G	G	G	G	G	G	G	G	G	G	G	G	G	R	R	G	A	A	R	G	G	A	R	A	A	R	G	A	A	A	failed	R	A	A	G	R	G	A	A	A	A	G
solcap_snp_sl_27106	A	A	A	A	A	A	A	A	A	A	A	A	A	A	A	A	A	A	A	A	A	A	A	A	A	A	A	A	A	A	A	A	A	A	A	A	A	A	A	A	A	A	A	A	A	A	A	A	A
solcap_snp_sl_23193	A	A	A	A	T	A	A	A	A	A	A	A	A	A	A	A	A	A	A	A	W	W	A	T	T	A	A	A	T	W	T	T	W	A	T	T	T	T	W	T	T	A	W	A	T	W	T	T	A
solcap_snp_sl_27108	A	A	A	A	A	A	A	A	A	A	A	A	A	A	A	A	A	A	A	A	A	A	A	A	A	A	A	A	A	A	A	A	A	A	A	A	A	A	A	A	A	A	A	A	A	A	A	A	A
solcap_snp_sl_27113	G	G	G	G	G	G	G	G	G	G	G	G	G	G	G	G	G	G	G	G	G	G	G	G	G	G	G	G	G	G	G	G	G	G	G	G	G	G	G	G	G	G	G	G	G	G	G	G	G
solcap_snp_sl_23195	A	A	A	A	G	A	A	A	A	A	A	A	A	A	A	A	A	A	A	A	R	R	A	G	R	A	A	A	G	R	G	G	R	A	G	G	R	R	R	G	G	G	R	A	G	A	G	G	G
solcap_snp_sl_23196	A	A	A	A	G	A	A	A	A	A	A	A	A	A	A	A	A	A	A	A	R	R	A	G	G	A	A	A	G	R	G	G	R	A	G	G	R	G	R	G	G	G	R	A	G	A	G	G	G
solcap_snp_sl_12718	C	C	C	C	T	C	C	C	C	C	C	C	C	C	C	C	C	C	C	C	Y	Y	C	T	T	C	C	C	T	Y	T	T	Y	C	T	T	Y	T	Y	T	T	T	Y	C	T	C	T	T	T
solcap_snp_sl_27130	G	G	G	G	G	G	G	G	G	G	G	G	G	G	G	G	G	G	G	G	G	G	G	G	G	G	G	G	G	G	G	G	G	G	G	G	G	G	G	G	G	G	G	G	G	G	G	G	G
Le004314_168_solcap_snp_sl_27137	G	G	G	G	G	G	G	G	G	G	G	G	G	G	G	G	G	G	G	G	G	G	G	G	G	G	G	G	G	G	G	G	G	G	G	G	G	G	G	G	G	G	G	G	G	G	G	G	G
solcap_snp_sl_27151	G	G	G	G	G	G	G	G	G	G	G	G	G	G	G	G	G	G	G	G	G	G	G	G	G	G	G	G	G	G	G	G	G	G	G	G	G	G	G	G	G	G	G	G	G	G	G	G	G
solcap_snp_sl_26280	T	T	T	T	T	T	T	T	T	T	T	T	T	T	T	T	T	T	T	T	T	T	T	T	T	T	T	T	T	T	T	T	T	T	T	T	T	T	T	T	T	T	T	T	T	T	T	T	T
solcap_snp_sl_12414	G	G	G	G	A	G	G	G	G	G	G	G	G	G	G	G	G	G	G	G	R	R	G	A	A	G	G	G	A	R	A	A	R	G	A	A	R	A	R	A	A	G	R	G	A	G	A	A	G
solcap_snp_sl_741	C	C	C	C	A	C	C	C	C	C	C	C	C	C	C	C	C	C	C	C	M	M	C	A	A	C	C	C	A	M	A	A	M	C	A	A	M	A	M	A	A	C	M	C	A	C	A	M	C
solcap_snp_sl_26291	C	C	C	C	C	C	C	C	C	C	C	C	C	C	C	C	C	C	C	C	C	C	C	C	C	C	C	C	C	C	C	C	C	C	C	C	C	C	C	C	C	C	C	C	C	C	C	C	C
solcap_snp_sl_16433	T	T	T	T	C	T	T	T	T	T	T	T	T	T	T	T	T	T	T	T	Y	Y	T	C	C	T	T	T	C	Y	C	C	Y	T	C	C	Y	C	Y	C	C	T	Y	T	C	T	C	Y	T
Le000209_237_solcap_snp_sl_26315	A	A	A	A	A	A	A	A	A	A	A	A	A	A	A	A	A	A	A	A	A	A	A	A	A	A	A	A	A	A	A	A	A	A	A	A	A	A	A	A	A	A	A	A	A	A	A	A	A
CL015709-0329	T	T	T	T	T	T	T	T	T	T	T	T	T	T	T	T	T	T	T	T	T	T	T	T	T	T	T	T	T	T	T	T	T	T	T	T	T	T	T	T	T	T	T	T	T	T	T	T	T
SL10506_244	C	C	C	C	C	C	C	C	C	C	C	C	C	C	C	C	C	C	C	C	C	C	C	C	C	C	C	C	C	C	C	C	C	C	C	C	C	C	C	C	C	C	C	C	C	C	C	C	C
solcap_snp_sl_26323	C	C	C	C	C	C	C	C	C	C	C	C	C	C	C	C	C	C	C	C	C	C	C	C	C	C	C	C	C	C	C	C	C	C	C	C	C	C	C	C	C	C	C	C	C	C	C	C	C
SGN-U573440_snp365	A	A	A	A	A	A	A	A	A	A	A	A	A	A	A	A	A	A	A	A	A	A	A	A	A	A	A	A	A	A	A	A	A	A	A	A	A	A	A	A	A	A	A	A	A	A	A	A	A
solcap_snp_sl_26327	G	G	G	G	G	G	G	G	G	G	G	G	G	G	G	G	G	G	G	G	G	G	G	G	G	G	G	G	G	G	G	G	G	G	G	G	G	G	G	G	G	G	G	G	G	G	G	G	G
solcap_snp_sl_26366	A	A	A	A	A	A	A	A	A	A	A	A	A	A	A	A	A	A	A	A	A	A	A	A	A	A	A	A	A	A	A	A	A	A	A	A	A	A	A	A	A	A	A	A	A	A	A	A	A
solcap_snp_sl_26385	C	C	C	C	C	C	C	C	C	C	C	C	C	C	C	C	C	C	C	C	C	C	C	C	C	C	C	C	C	C	C	C	C	C	C	C	C	C	C	C	C	C	C	C	C	C	C	C	C
solcap_snp_sl_26387	C	C	C	C	C	C	C	C	C	C	C	C	C	C	C	C	C	C	C	C	C	C	C	C	C	C	C	C	C	C	C	C	C	C	C	C	C	C	C	C	C	C	C	C	C	C	C	C	C
Le004122_27_solcap_snp_sl_26398	C	C	C	C	C	C	C	C	C	C	C	C	C	C	C	C	C	C	C	C	C	C	C	C	C	C	C	C	C	C	C	C	C	C	C	C	C	C	C	C	C	C	C	C	C	C	C	C	C
solcap_snp_sl_26399	G	G	G	G	G	G	G	G	G	G	G	G	G	G	G	G	G	G	G	G	G	G	G	G	G	G	G	G	G	G	G	G	G	G	G	G	G	G	G	G	G	G	G	G	G	G	G	G	G
solcap_snp_sl_30106	T	T	T	T	T	T	T	T	T	T	T	T	T	T	T	T	T	T	T	T	T	T	T	T	T	T	T	T	T	T	T	T	T	T	T	T	T	T	T	T	T	T	T	T	T	T	T	T	T
solcap_snp_sl_30098	A	A	A	A	A	A	A	A	A	A	A	A	A	A	A	A	A	A	A	A	A	A	A	A	A	A	A	A	A	A	A	A	A	A	A	A	A	A	A	A	A	A	A	A	A	A	A	A	A
solcap_snp_sl_30084	T	T	T	T	T	T	T	T	T	T	T	T	T	T	T	T	T	T	T	T	T	T	T	T	T	T	T	T	T	T	T	T	T	T	T	T	T	T	T	T	T	T	T	T	T	T	T	T	T
solcap_snp_sl_50341	T	T	T	T	T	T	T	T	T	T	T	T	T	T	T	T	T	T	T	T	T	T	T	T	T	T	T	T	T	T	T	T	T	T	T	T	T	T	T	T	T	T	T	T	T	T	T	T	T
solcap_snp_sl_4952	T	T	T	T	T	T	T	T	T	T	T	T	T	T	T	T	T	T	T	T	T	T	T	T	W	T	T	T	T	T	T	T	T	T	T	T	T	W	T	T	T	T	T	T	T	T	T	T	T
solcap_snp_sl_30078	G	G	G	G	G	G	G	G	G	G	G	G	G	G	G	G	G	G	G	G	G	G	G	G	G	G	G	G	G	G	G	G	G	G	G	G	G	G	G	G	G	G	G	G	G	G	G	G	G
solcap_snp_sl_30074	G	G	G	G	G	G	G	G	G	G	G	G	G	G	G	G	G	G	G	G	G	G	G	G	G	G	G	G	G	G	G	G	G	G	G	G	G	G	G	G	G	G	G	G	G	G	G	G	G
solcap_snp_sl_30067	G	G	G	G	G	G	G	G	G	G	G	G	G	G	G	G	G	G	G	G	G	G	G	G	G	G	G	G	G	G	G	G	G	G	G	G	G	G	G	G	G	G	G	G	G	G	G	G	G
solcap_snp_sl_18590	A	A	A	A	A	A	A	A	A	A	A	A	A	A	A	A	A	A	A	A	A	A	A	A	A	A	A	A	A	A	A	A	A	A	A	A	A	A	A	A	A	A	A	A	A	A	A	A	A
solcap_snp_sl_18588	C	C	C	C	C	C	C	C	C	C	C	C	C	C	C	C	C	C	C	C	C	C	C	C	C	C	C	C	C	C	C	C	C	C	C	C	C	C	C	C	C	C	C	C	C	C	C	C	C
solcap_snp_sl_30057	C	C	C	C	C	C	C	C	C	C	C	C	C	C	C	C	C	C	C	C	C	C	C	C	C	C	C	C	C	C	C	C	C	C	C	C	C	C	C	C	C	C	C	C	C	C	C	C	C
solcap_snp_sl_18585	C	C	C	C	C	C	C	C	C	C	C	C	C	C	C	C	C	C	C	C	C	C	C	C	C	C	C	C	C	C	C	C	C	C	C	C	C	C	C	C	C	C	C	C	C	C	C	C	C
solcap_snp_sl_18584	T	T	T	T	T	T	T	T	T	T	T	T	T	T	T	T	T	T	T	T	T	T	T	T	T	T	T	T	T	T	T	T	T	T	T	T	T	T	T	T	T	T	T	T	T	T	T	T	T
solcap_snp_sl_18583	C	C	C	C	C	C	C	C	C	C	C	C	C	C	C	C	C	C	C	C	C	C	C	C	C	C	C	C	C	C	C	C	C	C	C	C	C	C	C	C	C	C	C	C	C	C	C	C	C
solcap_snp_sl_18582	A	A	A	A	A	A	A	A	A	A	A	A	A	A	A	A	A	A	A	A	A	A	A	A	A	A	A	A	A	A	A	A	A	A	A	A	A	A	A	A	A	A	A	A	A	A	A	A	A
CL008836-0339	T	T	T	T	T	T	T	T	T	T	T	T	T	T	T	T	T	T	T	T	T	T	T	T	T	T	T	T	T	T	T	T	T	T	T	T	T	T	T	T	T	T	T	T	T	T	T	T	T
CL008836-0249	G	G	G	G	G	G	G	G	G	G	G	G	G	G	G	G	G	G	G	G	G	G	G	G	G	G	G	G	G	G	G	G	G	G	G	G	G	G	G	G	G	G	G	G	G	G	G	G	G
solcap_snp_sl_18581	G	G	G	G	G	G	G	G	G	G	G	G	G	G	G	G	G	G	G	G	G	G	G	G	G	G	G	G	G	G	G	G	G	G	G	G	G	G	G	G	G	G	G	G	G	G	G	G	G
solcap_snp_sl_50331	T	T	T	T	T	T	T	T	T	T	T	T	T	T	T	T	T	T	T	T	T	T	T	T	T	T	T	T	T	T	T	T	T	T	failed	T	T	T	T	T	T	T	T	T	T	T	T	T	T
solcap_snp_sl_30046	C	C	C	C	C	C	C	C	C	C	C	C	C	C	C	C	C	C	C	C	C	C	C	C	C	C	C	C	C	C	C	C	C	C	C	C	C	C	C	C	C	C	C	C	C	C	C	C	C
solcap_snp_sl_30038	G	G	G	G	G	G	G	G	G	G	G	G	G	G	G	G	G	G	G	G	G	G	G	G	G	G	G	G	G	G	G	G	G	G	G	G	G	G	G	G	G	G	G	G	G	G	G	G	G
solcap_snp_sl_4937	A	A	A	A	A	A	A	A	A	A	A	A	A	A	A	A	A	A	A	A	A	A	A	A	A	A	A	A	T	A	A	A	A	W	A	W	A	A	A	A	T	A	A	A	A	A	A	W	A
solcap_snp_sl_30035	G	G	G	G	G	G	G	G	G	G	G	G	G	G	G	G	G	G	G	G	G	G	G	G	G	G	G	G	G	G	G	G	G	G	G	G	G	G	G	G	G	G	G	G	G	G	G	G	G
solcap_snp_sl_30033	T	T	T	T	T	T	T	T	T	T	T	T	T	T	T	T	T	T	T	T	T	T	T	T	T	T	T	T	T	T	T	T	T	T	T	T	T	T	T	T	T	T	T	T	T	T	T	T	T
solcap_snp_sl_30031	A	A	A	A	A	A	A	A	A	A	A	A	A	A	A	A	A	A	A	A	A	A	A	A	A	A	A	A	A	A	A	A	A	A	A	A	A	A	A	A	A	A	A	A	A	A	A	A	A
solcap_snp_sl_30024	A	A	A	A	A	A	A	A	A	A	A	A	A	A	A	A	A	A	A	A	A	A	A	A	A	A	A	A	A	A	A	A	A	A	A	A	A	A	A	A	A	A	A	A	A	A	A	A	A
solcap_snp_sl_50318	A	A	A	A	A	A	A	A	A	A	A	A	A	A	A	A	A	A	A	A	A	A	A	A	A	A	A	A	A	A	A	A	A	A	A	A	A	A	A	A	A	A	A	A	A	A	A	A	A
solcap_snp_sl_30015	C	C	C	C	C	C	C	C	C	C	C	C	C	C	C	C	C	C	C	C	C	C	C	C	C	C	C	C	C	C	C	C	C	C	C	C	C	C	C	C	C	C	C	C	C	C	C	C	C
solcap_snp_sl_30006	A	A	A	A	A	A	A	A	A	A	A	A	A	A	A	A	A	A	A	A	A	A	A	A	A	A	A	A	A	A	A	A	A	A	A	A	A	A	A	A	A	A	A	A	A	A	A	A	A
solcap_snp_sl_31646	G	G	G	G	G	G	G	G	G	G	G	G	G	G	G	G	G	G	G	G	G	G	G	G	G	G	G	G	G	G	G	G	G	G	G	G	G	G	G	G	G	G	G	G	G	G	G	G	G
solcap_snp_sl_31648	C	C	C	C	C	C	C	C	C	C	C	C	C	C	C	C	C	C	C	C	C	C	C	C	C	C	C	C	C	C	C	C	C	C	C	C	C	C	C	C	C	C	C	C	C	C	C	C	C
solcap_snp_sl_31653	T	T	T	T	T	T	T	T	T	T	T	T	T	T	T	T	T	T	T	T	T	T	T	T	T	T	T	T	T	T	T	T	T	T	T	T	T	T	T	T	T	T	T	T	T	T	T	T	T
solcap_snp_sl_31655	G	G	G	G	G	G	G	G	G	G	G	G	G	G	G	G	G	G	G	G	G	G	G	G	G	G	G	G	G	G	G	G	G	G	G	G	G	G	G	G	G	G	G	G	G	G	G	G	G
solcap_snp_sl_28583	T	T	T	T	T	T	T	T	T	T	T	T	T	T	T	T	T	T	T	T	T	T	T	T	T	T	T	T	T	T	T	T	T	T	T	T	T	T	T	T	T	T	T	T	T	T	T	T	T
solcap_snp_sl_28586	C	C	C	C	C	C	C	C	C	C	C	C	C	C	C	C	C	C	C	C	C	C	C	C	C	C	C	C	C	C	C	C	C	C	C	C	C	C	C	C	C	C	C	C	C	C	C	C	C
solcap_snp_sl_36888	A	A	A	A	A	A	A	A	A	A	A	A	A	A	A	A	A	A	A	A	A	A	A	A	A	A	A	A	A	A	A	A	A	A	A	A	A	A	A	A	A	A	A	A	A	A	A	A	A
SGN-U576317_snp104_solcap_snp_sl_32529	T	T	T	T	T	T	T	T	T	T	T	T	T	T	T	T	T	T	T	T	T	T	T	T	T	T	T	T	T	T	T	T	T	T	T	T	T	T	T	T	T	T	T	T	T	T	T	T	T
solcap_snp_sl_32530	T	T	T	T	T	T	T	T	T	T	T	T	T	T	T	T	T	T	T	T	T	T	T	T	T	T	T	T	T	T	T	T	T	T	T	T	T	T	T	T	T	T	T	T	T	T	T	T	T
solcap_snp_sl_29933	G	G	G	G	G	G	G	G	G	G	G	G	G	G	G	G	G	G	G	G	G	G	G	G	G	G	G	G	G	G	G	G	G	G	G	G	G	G	G	G	G	G	G	G	G	G	G	G	G
SGN-U604433_snp183_solcap_snp_sl_29934	A	A	A	A	A	A	A	A	A	A	A	A	A	A	A	A	A	A	A	A	A	A	A	A	A	A	A	A	A	A	A	A	A	A	A	A	A	A	A	A	A	A	A	A	A	A	A	A	A
solcap_snp_sl_50290	A	A	A	A	A	A	A	A	A	A	A	A	A	A	A	A	A	A	A	A	A	A	A	A	A	A	A	A	A	A	A	A	A	A	A	A	A	A	A	A	A	A	A	A	A	A	A	A	A
solcap_snp_sl_29939	T	T	T	T	T	T	T	T	T	T	T	T	T	T	T	T	T	T	T	T	T	T	T	T	T	T	T	T	T	T	T	T	T	T	T	T	T	T	T	T	T	T	T	T	T	T	T	T	T
SGN-U564058_snp1352_solcap_snp_sl_29940	G	G	G	G	G	G	G	G	G	G	G	G	G	G	G	G	G	G	G	G	G	G	G	G	G	G	G	G	G	G	G	G	G	G	G	G	G	G	G	G	G	G	G	G	G	G	G	G	G
solcap_snp_sl_29941	C	C	C	C	C	C	C	C	C	C	C	C	C	C	C	C	C	C	C	C	C	C	C	C	C	C	C	C	C	C	C	C	C	C	C	C	C	C	C	C	C	C	C	C	C	C	C	C	C
solcap_snp_sl_29946	C	C	C	C	C	C	C	C	C	C	C	C	C	C	C	C	C	C	C	C	C	C	C	C	C	C	C	C	C	C	C	C	C	C	C	C	C	C	C	C	C	C	C	C	C	C	C	C	C
solcap_snp_sl_29948	G	G	G	G	G	G	G	G	G	G	G	G	G	G	G	G	G	G	G	G	G	G	G	G	G	G	G	G	G	G	G	G	G	G	G	G	G	G	G	G	G	G	G	G	G	G	G	G	G
solcap_snp_sl_50297	C	C	C	C	C	C	C	C	C	C	C	C	C	C	C	C	C	C	C	C	C	C	C	C	C	C	C	C	C	C	C	C	C	C	C	C	C	C	C	C	C	C	C	C	C	C	C	C	C
solcap_snp_sl_50305	T	T	T	T	T	T	T	T	T	T	T	T	T	T	T	T	T	T	T	T	T	T	T	T	T	T	T	T	T	T	T	T	T	T	T	T	T	T	T	T	T	T	T	T	T	T	T	T	T
solcap_snp_sl_50307	T	T	T	T	T	T	T	T	T	T	T	T	T	T	T	T	T	T	T	T	T	T	T	T	T	T	T	T	T	T	T	T	T	T	T	T	T	T	T	T	T	T	T	T	T	T	T	T	T
solcap_snp_sl_4926	T	T	T	T	T	T	T	T	T	T	T	T	T	T	T	T	T	T	T	T	T	T	T	T	T	T	T	T	A	T	T	T	T	W	T	W	T	T	T	T	A	T	T	T	T	T	T	W	T
solcap_snp_sl_29975	T	T	T	T	T	T	T	T	T	T	T	T	T	T	T	T	T	T	T	T	T	T	T	T	T	T	T	T	T	T	T	T	T	T	T	T	T	T	T	T	T	T	T	T	T	T	T	T	T
solcap_snp_sl_29993	G	G	G	G	G	G	G	G	G	G	G	G	G	G	G	G	G	G	G	G	G	G	G	G	G	G	G	G	G	G	G	G	G	G	G	G	G	G	G	G	G	G	G	G	G	G	G	G	G
solcap_snp_sl_29998	C	C	C	C	C	C	C	C	C	C	C	C	C	C	C	C	C	C	C	C	Y	Y	C	C	Y	Y	Y	Y	C	C	Y	C	failed	Y	failed	C	Y	Y	failed	C	C	C	Y	failed	failed	failed	failed	C	C
solcap_snp_sl_13743	A	A	A	A	A	A	A	A	A	A	A	A	A	A	A	A	A	A	A	A	A	A	A	A	A	A	A	A	A	A	A	A	A	A	A	A	A	A	A	A	A	A	A	A	A	A	A	A	A
solcap_snp_sl_51994	T	T	T	T	T	T	T	T	T	T	T	T	T	T	T	T	T	T	T	T	T	T	T	T	T	T	T	T	T	T	T	T	T	T	T	T	T	T	T	T	T	T	T	T	T	T	T	T	T
solcap_snp_sl_30528	T	T	T	T	T	T	T	T	T	T	T	T	T	T	T	T	T	T	T	T	T	T	T	T	T	T	T	T	T	T	T	T	T	T	T	T	T	T	T	T	T	T	T	T	T	T	T	T	T
solcap_snp_sl_30532	A	A	A	A	A	A	A	A	A	A	A	A	A	A	A	A	A	A	A	A	A	A	A	A	A	A	A	A	A	A	A	A	A	A	A	A	A	A	A	A	A	A	A	A	A	A	A	A	A
solcap_snp_sl_30533	C	C	C	C	C	C	C	C	C	C	C	C	C	C	C	C	C	C	C	C	C	C	C	C	C	C	C	C	C	C	C	C	C	C	C	C	C	C	C	C	C	C	C	C	C	C	C	C	C
solcap_snp_sl_52143	G	G	G	G	G	G	G	G	G	G	G	G	G	G	G	G	G	G	G	G	G	G	G	G	G	G	G	G	G	G	G	G	G	G	G	G	G	G	G	G	G	G	G	G	G	G	G	G	G
SGN-U578356_snp142_solcap_snp_sl_30539	T	T	T	T	T	T	T	T	T	T	T	T	T	T	T	T	T	T	T	T	T	T	T	T	T	T	T	T	T	T	T	T	T	T	T	T	T	T	T	T	T	T	T	T	T	T	T	T	T
solcap_snp_sl_5547	G	G	G	G	G	G	G	G	G	G	G	G	G	G	G	G	G	G	G	G	G	G	G	G	G	G	G	G	A	G	G	G	G	R	G	R	G	G	G	G	A	G	G	G	G	G	G	R	G
solcap_snp_sl_30540	G	G	G	G	G	G	G	G	G	G	G	G	G	G	G	G	G	G	G	G	G	G	G	G	G	G	G	G	G	G	G	G	G	G	G	G	G	G	G	G	G	G	G	G	G	G	G	G	G
Le004377_94	C	C	C	C	C	C	C	C	C	C	C	C	C	C	C	C	C	C	C	C	C	C	C	C	C	C	C	C	C	C	C	C	C	C	C	C	C	C	C	C	C	C	C	C	C	C	C	C	C
solcap_snp_sl_30543	C	C	C	C	C	C	C	C	C	C	C	C	C	C	C	C	C	C	C	C	C	C	C	C	C	C	C	C	C	C	C	C	C	C	C	C	C	C	C	C	C	C	C	C	C	C	C	C	C
solcap_snp_sl_30552	C	C	C	C	C	C	C	C	C	C	C	C	C	C	C	C	C	C	C	C	C	C	C	C	C	C	C	C	C	C	C	C	C	C	C	C	C	C	C	C	C	C	C	C	C	C	C	C	C
solcap_snp_sl_30553	G	G	G	G	G	G	G	G	G	G	G	G	G	G	G	G	G	G	G	G	G	G	G	G	G	G	G	G	G	G	G	G	G	G	G	G	G	G	G	G	G	G	G	G	G	G	G	G	G
solcap_snp_sl_30556	C	C	C	C	C	C	C	C	C	C	C	C	C	C	C	C	C	C	C	C	C	C	C	C	C	C	C	C	C	C	C	C	C	C	C	C	C	C	C	C	C	C	C	C	C	C	C	C	C
solcap_snp_sl_30559	T	T	T	T	T	T	T	T	T	T	T	T	T	T	T	T	T	T	T	T	T	T	T	T	T	T	T	T	T	T	T	T	T	T	T	T	T	T	T	T	T	T	T	T	T	T	T	T	T
solcap_snp_sl_30571	A	A	A	A	A	A	A	A	A	A	A	A	A	A	A	A	A	A	A	A	A	A	A	A	A	A	A	A	A	A	A	A	A	A	A	A	A	A	A	A	A	A	A	A	A	A	A	A	A
solcap_snp_sl_30580	T	T	T	T	T	T	T	T	T	T	T	T	T	T	T	T	T	T	T	T	T	T	T	T	T	T	T	T	T	T	T	T	T	T	T	T	T	T	T	T	T	T	T	T	T	T	T	T	T
solcap_snp_sl_30586	G	G	G	G	G	G	G	G	G	G	G	G	G	G	G	G	G	G	G	G	G	G	G	G	G	G	G	G	G	G	G	G	G	G	G	G	G	G	G	G	G	G	G	G	G	G	G	G	G
solcap_snp_sl_30587	G	G	G	G	G	G	G	G	G	G	G	G	G	G	G	G	G	G	G	G	G	G	G	G	G	G	G	G	G	G	G	G	G	G	G	G	G	G	G	G	G	G	G	G	G	G	G	G	G
solcap_snp_sl_30589	T	T	T	T	T	T	T	T	T	T	T	T	T	T	T	T	T	T	T	T	T	T	T	T	T	T	T	T	T	T	T	T	T	T	T	T	T	T	T	T	T	T	T	T	T	T	T	T	T
solcap_snp_sl_30590	C	C	C	C	C	C	C	C	C	C	C	C	C	C	C	C	C	C	C	C	C	C	C	C	C	C	C	C	C	C	C	C	C	C	C	C	C	C	C	C	C	C	C	C	C	C	C	C	C
CL015569-0389	T	T	T	T	T	T	T	T	T	T	T	T	T	T	T	T	T	T	T	T	T	T	T	T	T	T	T	T	T	T	T	T	T	T	T	T	T	T	T	T	T	T	T	T	T	T	T	T	T
solcap_snp_sl_30593	C	C	C	C	C	C	C	C	C	C	C	C	C	C	C	C	C	C	C	C	C	C	C	C	C	C	C	C	C	C	C	C	C	C	C	C	C	C	C	C	C	C	C	C	C	C	C	C	C
solcap_snp_sl_36304	G	G	G	G	G	G	G	G	G	G	G	G	G	G	G	G	G	G	G	G	G	G	G	G	G	G	G	G	G	G	G	G	G	G	G	G	G	G	G	G	G	G	G	G	G	G	G	G	G
solcap_snp_sl_36307	A	A	A	A	A	A	A	A	A	A	A	A	A	A	A	A	A	A	A	A	A	A	A	A	A	A	A	A	A	A	A	A	A	A	A	A	A	A	A	A	A	A	A	A	A	A	A	A	A
solcap_snp_sl_36308	C	C	C	C	C	C	C	C	C	C	C	C	C	C	C	C	C	C	C	C	C	C	C	C	C	C	C	C	C	C	C	C	C	C	C	C	C	C	C	C	C	C	C	C	C	C	C	C	C
solcap_snp_sl_36309	G	G	G	G	G	G	G	G	G	G	G	G	G	G	G	G	G	G	G	G	G	G	G	G	G	G	G	G	G	G	G	G	G	G	G	G	G	G	G	G	G	G	G	G	G	G	G	G	G
SGN-U316416_snp254	C	C	C	C	C	C	C	C	C	C	C	C	C	C	C	C	C	C	C	C	C	C	C	C	C	C	C	C	C	C	C	C	C	C	C	C	C	C	C	C	C	C	C	C	C	C	C	C	C
solcap_snp_sl_30354	A	A	A	A	A	A	A	A	A	A	A	A	A	A	A	A	A	A	A	A	A	A	A	A	A	A	A	A	A	A	A	A	A	A	A	A	A	A	A	A	A	A	A	A	A	A	A	A	A
solcap_snp_sl_51487	A	A	A	A	A	A	A	A	A	A	A	A	A	A	A	A	A	A	A	A	A	A	A	A	A	A	A	A	A	A	A	A	A	A	A	A	A	A	A	A	A	A	A	A	A	A	A	A	A
solcap_snp_sl_30377	G	G	G	G	G	G	G	G	G	G	G	G	G	G	G	G	G	G	G	G	G	G	G	G	G	G	G	G	G	G	G	G	G	G	G	G	G	G	G	G	G	G	G	G	G	G	G	G	G
solcap_snp_sl_27253	T	T	T	T	T	T	T	T	T	T	T	T	T	T	T	T	T	T	T	T	T	T	T	T	T	T	T	T	T	T	T	T	T	T	T	T	T	T	T	T	T	T	T	T	T	T	T	T	T
solcap_snp_sl_27248	G	G	G	G	G	G	G	G	G	G	G	G	G	G	G	G	G	G	G	G	G	G	G	G	G	G	G	G	G	G	G	G	G	G	G	G	G	G	G	G	G	G	G	G	G	G	G	G	G
solcap_snp_sl_27246	T	T	T	T	T	T	T	T	T	T	T	T	T	T	T	T	T	T	T	T	T	T	T	T	T	T	T	T	T	T	T	T	T	T	T	T	T	T	T	T	T	T	T	T	T	T	T	T	T
solcap_snp_sl_27243	T	T	T	T	T	T	T	T	T	T	T	T	T	T	T	T	T	T	T	T	T	T	T	T	T	T	T	T	T	T	T	T	T	T	T	T	T	T	T	T	T	T	T	T	T	T	T	T	T
solcap_snp_sl_27238	A	A	A	A	A	A	A	A	A	A	A	A	A	A	A	A	A	A	A	A	A	A	A	A	A	A	A	A	A	A	A	A	A	A	A	A	A	A	A	A	A	A	A	A	A	A	A	A	A
solcap_snp_sl_1779	G	G	G	G	G	G	G	G	G	G	G	G	G	G	G	G	G	G	G	G	K	K	T	G	K	K	K	K	G	G	T	K	K	G	K	K	K	G	K	K	G	T	K	G	T	K	K	K	T
solcap_snp_sl_27230	C	C	C	C	C	C	C	C	C	C	C	C	C	C	C	C	C	C	C	C	C	C	C	C	C	C	C	C	C	C	C	C	C	C	C	C	C	C	C	C	C	C	C	C	C	C	C	C	C
solcap_snp_sl_42166	T	T	T	T	T	T	T	T	T	T	T	T	T	T	T	T	T	T	T	T	T	T	T	T	T	T	T	T	T	T	T	T	T	T	T	T	T	T	T	T	T	T	T	T	T	T	T	T	T
solcap_snp_sl_12799	C	C	C	C	C	C	C	C	C	C	C	C	C	C	C	C	C	C	C	C	C	C	C	C	C	C	C	C	T	C	C	C	C	Y	C	Y	C	C	C	C	T	C	C	C	C	C	C	Y	C
solcap_snp_sl_1773	G	G	G	G	G	G	G	G	G	G	G	G	G	G	G	G	G	G	G	G	G	G	G	G	G	G	G	G	T	G	G	G	G	K	G	K	G	G	G	G	T	G	G	G	G	G	G	K	G
solcap_snp_sl_27228	C	C	C	C	C	C	C	C	C	C	C	C	C	C	C	C	C	C	C	C	C	C	C	C	C	C	C	C	C	C	C	C	C	C	C	C	C	C	C	C	C	C	C	C	C	C	C	C	C
solcap_snp_sl_1772	A	A	A	A	A	A	A	A	A	A	A	A	A	A	A	A	A	A	A	A	A	A	A	A	A	A	A	A	G	A	A	A	A	R	A	R	A	A	A	A	G	A	A	A	A	A	A	R	A
CL016166-0053	A	A	A	A	A	A	A	A	A	A	A	A	A	A	A	A	A	A	A	A	A	A	A	A	A	A	A	A	A	A	A	A	A	A	A	A	A	A	A	A	A	A	A	A	A	A	A	A	A
solcap_snp_sl_27224	T	T	T	T	T	T	T	T	T	T	T	T	T	T	T	T	T	T	T	T	T	T	T	T	T	T	T	T	T	T	T	T	T	T	T	T	T	T	T	T	T	T	T	T	T	T	T	T	T
solcap_snp_sl_27221	G	G	G	G	G	G	G	G	G	G	G	G	G	G	G	G	G	G	G	G	G	G	G	G	G	G	G	G	G	G	G	G	G	G	G	G	G	G	G	G	G	G	G	G	G	G	G	G	G
solcap_snp_sl_42160	T	T	T	T	T	T	T	T	T	T	T	T	T	T	T	T	T	T	T	T	T	T	T	T	T	T	T	T	T	T	T	T	T	T	T	T	T	T	T	T	T	T	T	T	T	T	T	T	T
solcap_snp_sl_30945	A	A	A	A	A	A	A	A	A	A	A	A	A	A	A	A	A	A	A	A	A	A	A	A	A	A	A	A	A	A	A	A	A	A	A	A	A	A	A	A	A	A	A	A	A	A	A	A	A
solcap_snp_sl_5761	C	C	C	C	C	C	C	C	C	C	C	C	C	C	C	C	C	C	C	C	C	C	C	C	C	C	Y	C	T	C	C	C	Y	Y	C	Y	C	C	C	C	T	C	C	C	C	C	Y	Y	C
solcap_snp_sl_5764	T	T	T	T	T	T	T	T	T	T	T	T	T	T	T	T	T	T	T	T	T	T	T	T	T	T	W	T	A	T	T	T	W	W	T	W	T	T	T	T	A	T	T	T	T	T	W	W	T
solcap_snp_sl_5765	A	A	A	A	A	A	A	A	A	A	A	A	A	A	A	A	A	A	A	A	A	A	A	A	A	A	M	A	C	A	A	A	M	M	A	M	A	A	A	A	C	A	A	A	A	A	M	M	A
solcap_snp_sl_5766	A	A	A	A	A	A	A	A	A	A	A	A	A	A	A	A	A	A	A	A	A	A	A	A	A	A	R	A	G	A	A	A	R	R	A	R	A	A	A	A	G	A	A	A	A	A	R	R	A
solcap_snp_sl_5768	C	C	C	C	C	C	C	C	C	C	C	C	C	C	C	C	C	C	C	C	C	C	C	C	C	C	S	C	G	C	C	C	S	S	C	S	C	C	C	C	G	C	C	C	C	C	S	S	C
solcap_snp_sl_5769	T	T	T	T	T	T	T	T	T	T	T	T	T	T	T	T	T	T	T	T	T	T	T	T	T	T	Y	T	C	T	T	T	Y	Y	T	Y	T	T	T	T	C	T	T	T	T	T	Y	Y	T
solcap_snp_sl_5770	T	T	T	T	T	T	T	T	T	T	T	T	T	T	T	T	T	T	T	T	T	T	T	T	T	T	Y	T	C	T	T	T	Y	Y	T	Y	T	T	T	T	C	T	T	T	T	T	Y	Y	T
solcap_snp_sl_5771	G	G	G	G	G	G	G	G	G	G	G	G	G	G	G	G	G	G	G	G	G	G	G	G	G	G	R	G	A	G	G	G	R	R	G	R	G	G	G	G	A	G	G	G	G	G	R	R	G
solcap_snp_sl_14002	T	T	T	T	T	T	T	T	T	T	T	T	T	T	T	T	T	T	T	T	T	T	T	T	T	T	W	T	A	T	T	T	W	W	T	W	T	T	T	T	A	T	T	T	T	T	W	W	T
solcap_snp_sl_5772	T	T	T	T	T	T	T	T	T	T	T	T	T	T	T	T	T	T	T	T	T	T	T	T	T	T	Y	T	Y	T	T	T	Y	Y	T	Y	T	T	T	T	Y	T	T	T	T	T	Y	Y	T
solcap_snp_sl_5773	C	C	C	C	C	C	C	C	C	C	C	C	C	C	C	C	C	C	C	C	C	C	C	C	C	C	Y	C	T	C	C	C	Y	Y	C	Y	C	C	C	C	T	C	C	C	C	C	Y	Y	C
solcap_snp_sl_5774	T	T	T	T	T	T	T	T	T	T	T	T	T	T	T	T	T	T	T	T	T	T	T	T	T	T	Y	T	C	T	T	T	Y	Y	T	Y	T	T	T	T	C	T	T	T	T	T	Y	Y	T
solcap_snp_sl_33651	T	T	T	T	T	T	T	T	T	T	T	T	T	T	T	T	T	T	T	T	T	T	T	T	T	T	T	T	T	T	T	T	T	T	T	T	T	T	T	T	T	T	T	T	T	T	T	T	T
solcap_snp_sl_33652	T	T	T	T	T	T	T	T	T	T	T	T	T	T	T	T	T	T	T	T	T	T	T	T	T	T	T	T	T	T	T	T	T	T	T	T	T	T	T	T	T	T	T	T	T	T	T	T	T
solcap_snp_sl_30631	C	C	C	C	C	C	C	C	C	C	C	C	C	C	C	C	C	C	C	C	C	C	C	C	C	C	C	C	C	C	C	C	C	C	C	C	C	C	C	C	C	C	C	C	C	C	C	C	C
solcap_snp_sl_13958	T	T	T	T	T	T	T	T	T	T	T	T	T	T	T	T	T	T	T	T	T	T	T	T	T	T	T	T	T	T	T	T	T	T	T	T	T	T	T	T	T	T	T	T	T	T	T	T	T
solcap_snp_sl_5656	G	G	G	G	G	G	G	G	G	G	G	G	G	G	G	G	G	G	G	G	G	G	G	G	G	G	G	G	R	G	G	G	G	G	G	R	G	G	G	G	A	G	G	G	G	G	R	R	G
solcap_snp_sl_30657	T	T	T	T	T	T	T	T	T	T	T	T	T	T	T	T	T	T	T	T	T	T	T	T	T	T	T	T	T	T	T	T	T	T	T	T	T	T	T	T	T	T	T	T	T	T	T	T	T
solcap_snp_sl_30678	G	G	G	G	G	G	G	G	G	G	G	G	G	G	G	G	G	G	G	G	G	G	G	G	G	G	G	G	G	G	G	G	G	G	G	G	G	G	G	G	G	G	G	G	G	G	G	G	G
solcap_snp_sl_30704	A	A	A	A	A	A	A	A	A	A	A	A	A	A	A	A	A	A	A	A	A	A	A	A	A	A	A	A	A	A	A	A	A	A	A	A	A	A	A	A	A	A	A	A	A	A	A	A	A
Le011256_136_solcap_snp_sl_30707	G	G	G	G	G	G	G	G	G	G	G	G	G	G	G	G	G	G	G	G	G	G	G	G	G	G	G	G	G	G	G	G	G	G	G	G	G	G	G	G	G	G	G	G	G	G	G	G	G
solcap_snp_sl_30722	A	A	A	A	A	A	A	A	A	A	A	A	A	A	A	A	A	A	A	A	A	A	A	A	A	A	A	A	A	A	A	A	A	A	A	A	A	A	A	A	A	A	A	A	A	A	A	A	A
solcap_snp_sl_18943	T	T	T	T	T	T	T	T	T	T	T	T	T	T	T	T	T	T	T	T	T	T	T	T	T	T	T	T	T	T	T	T	T	T	T	T	T	T	T	T	T	T	T	T	T	T	T	T	T
solcap_snp_sl_52337	G	G	G	G	G	G	G	G	G	G	G	G	G	G	G	G	G	G	G	G	G	G	G	G	G	G	G	G	G	G	G	G	G	G	G	G	G	G	G	G	G	G	G	G	G	G	G	G	G
CL016221-0325	T	T	T	T	T	T	T	T	T	T	T	T	T	T	T	T	T	T	T	T	T	T	T	T	T	T	T	T	T	T	T	T	T	T	T	T	T	T	T	T	T	T	T	T	T	T	T	T	T
solcap_snp_sl_18944	G	G	G	G	G	G	G	G	G	G	G	G	G	G	G	G	G	G	G	G	G	G	G	G	G	G	G	G	G	G	G	G	G	G	G	G	G	G	G	G	G	G	G	G	G	G	G	G	G
solcap_snp_sl_30763	G	G	G	G	G	G	G	G	G	G	G	G	G	G	G	G	G	G	G	G	G	G	G	G	G	G	G	G	G	G	G	G	G	G	G	G	G	G	G	G	G	G	G	G	G	G	G	G	G
solcap_snp_sl_30774	A	A	A	A	A	A	A	A	A	A	A	A	A	A	A	A	A	A	A	A	A	A	A	A	A	A	A	A	A	A	A	A	A	A	A	A	A	A	A	A	A	A	A	A	A	A	A	A	A
solcap_snp_sl_30776	T	T	T	T	T	T	T	T	T	T	T	T	T	T	T	T	T	T	T	T	T	T	T	T	T	T	T	T	T	T	T	T	T	T	T	T	T	T	T	T	T	T	T	T	T	T	T	T	T
solcap_snp_sl_18949	T	T	T	T	T	T	T	T	T	T	T	T	T	T	T	T	T	T	T	T	T	T	T	T	T	T	T	T	T	T	T	T	T	T	T	T	T	T	T	T	T	T	T	T	T	T	T	T	T
solcap_snp_sl_18952	G	G	G	G	G	G	G	G	G	G	G	G	G	G	G	G	G	G	G	G	G	G	G	G	G	G	G	G	G	G	G	G	G	G	G	G	G	G	G	G	G	G	G	G	G	G	G	G	G
SL10910_315	G	G	G	G	G	G	G	G	G	G	G	G	G	G	G	G	G	G	G	G	G	G	G	G	G	G	G	G	G	G	G	G	G	G	G	G	G	G	G	G	G	G	G	G	G	G	G	G	G
solcap_snp_sl_18959	G	G	G	G	G	G	G	G	G	G	G	G	G	G	G	G	G	G	G	G	G	G	G	G	G	G	G	G	G	G	G	G	G	G	G	G	G	G	G	G	G	G	G	G	G	G	G	G	G
CL016704-0620	T	T	T	T	T	T	T	T	T	T	T	T	T	T	T	T	T	T	T	T	T	T	T	T	T	T	T	T	T	T	T	T	T	T	T	T	T	T	T	T	T	T	T	T	T	T	T	T	T
solcap_snp_sl_52352	G	G	G	G	G	G	G	G	G	G	G	G	G	G	G	G	G	G	G	G	G	G	G	G	G	G	G	G	G	G	G	G	G	G	G	G	G	G	G	G	G	G	G	G	G	G	G	G	G
solcap_snp_sl_30813	A	A	A	A	A	A	A	A	A	A	A	A	A	A	A	A	A	A	A	A	A	A	A	A	A	A	A	A	A	A	A	A	A	A	A	A	A	A	A	A	A	A	A	A	A	A	A	A	A
solcap_snp_sl_30819	C	C	C	C	C	C	C	C	C	C	C	C	C	C	C	C	C	C	C	C	C	C	C	C	C	C	C	C	C	C	C	C	C	C	C	C	C	C	C	C	C	C	C	C	C	C	C	C	C
solcap_snp_sl_18967	T	T	G	T	T	T	G	T	T	G	G	T	G	T	T	T	T	T	G	T	K	G	G	G	G	K	K	G	K	K	G	T	K	T	G	G	K	G	failed	G	G	K	G	G	G	K	G	K	K
solcap_snp_sl_30821	C	C	C	C	C	C	C	C	C	C	C	C	C	C	C	C	C	C	C	C	C	C	C	C	C	C	C	C	C	C	C	C	C	C	C	C	C	C	C	C	C	C	C	C	C	C	C	C	C
solcap_snp_sl_30825	T	T	T	T	T	T	T	T	T	T	T	T	T	T	T	T	T	T	T	T	T	T	T	T	T	T	T	T	T	T	T	T	T	T	T	T	T	T	T	T	T	T	T	T	T	T	T	T	T
solcap_snp_sl_30827	T	T	T	T	T	T	T	T	T	T	T	T	T	T	T	T	T	T	T	T	T	T	T	T	T	T	T	T	T	T	T	T	T	T	T	T	T	T	T	T	T	T	T	T	T	T	T	T	T
solcap_snp_sl_30918	C	C	C	C	C	C	C	C	C	C	C	C	C	C	C	C	C	C	C	C	C	C	C	C	C	C	C	C	C	C	C	C	C	C	C	C	C	C	C	C	C	C	C	C	C	C	C	C	C
solcap_snp_sl_52395	A	A	A	A	A	A	A	A	A	A	A	A	A	A	A	A	A	A	A	A	A	A	A	A	A	A	A	A	A	A	A	A	A	A	A	A	A	A	A	A	A	A	A	A	A	A	A	A	A
solcap_snp_sl_30911	G	G	G	G	G	G	G	G	G	G	G	G	G	G	G	G	G	G	G	G	G	G	G	G	G	G	G	G	G	G	G	G	G	G	G	G	G	G	G	G	G	G	G	G	G	G	G	G	G
solcap_snp_sl_5722	T	T	T	T	G	T	T	T	T	T	T	T	T	T	T	T	T	T	T	T	K	K	G	G	K	T	G	G	G	K	T	K	G	K	G	G	K	K	K	K	G	G	G	T	K	T	G	G	G
solcap_snp_sl_24081	C	C	C	C	C	C	C	C	C	C	C	C	C	C	C	C	C	C	C	C	M	M	C	C	M	C	A	A	M	M	C	M	A	M	A	M	M	M	M	M	C	A	A	C	M	C	M	M	A
solcap_snp_sl_30876	T	T	T	T	T	T	T	T	T	T	T	T	T	T	T	T	T	T	T	T	T	T	T	T	T	T	T	T	T	T	T	T	T	T	T	T	T	T	T	T	T	T	T	T	T	T	T	T	T
solcap_snp_sl_30359	C	C	C	C	C	C	C	C	C	C	C	C	C	C	C	C	C	C	C	C	C	C	C	C	C	C	C	C	C	C	C	C	C	C	C	C	Y	C	C	C	C	C	C	C	Y	C	C	Y	C
solcap_snp_sl_18985	T	T	T	T	T	T	T	T	T	T	T	T	T	T	T	T	T	T	T	T	T	T	T	T	T	T	T	T	T	T	T	T	T	T	T	T	T	T	T	T	T	T	T	T	T	T	T	T	T
solcap_snp_sl_18984	G	G	G	G	G	G	G	G	G	G	G	G	G	G	G	G	G	G	G	G	G	G	G	G	G	G	G	G	G	G	G	G	G	G	G	G	G	G	G	G	G	G	G	G	G	G	G	G	G
solcap_snp_sl_30862	A	A	A	A	A	A	A	A	A	A	A	A	A	A	A	A	A	A	A	A	A	A	A	A	A	A	A	A	A	A	A	A	A	A	A	A	A	A	A	A	A	A	A	A	A	A	A	A	A
solcap_snp_sl_30860	A	A	A	A	A	A	A	A	A	A	A	A	A	A	A	A	A	A	A	A	A	A	A	A	A	A	A	A	A	A	A	A	A	A	A	A	A	A	A	A	A	A	A	A	A	A	A	A	A
solcap_snp_sl_30857	A	A	A	A	A	A	A	A	A	A	A	A	A	A	A	A	A	A	A	A	A	A	A	A	A	A	A	A	A	A	A	A	A	A	A	A	A	A	A	A	A	A	A	A	A	A	A	A	A
solcap_snp_sl_30848	C	C	C	C	C	C	C	C	C	C	C	C	C	C	C	C	C	C	C	C	C	C	C	C	C	C	C	C	C	C	C	C	C	C	C	C	C	C	C	C	C	C	C	C	C	C	C	C	C
solcap_snp_sl_18982	G	G	G	G	A	G	G	G	G	G	G	G	G	G	G	G	G	G	G	G	R	A	A	A	R	R	A	A	A	R	A	A	A	R	A	A	R	R	R	A	A	A	A	G	A	R	R	A	A
solcap_snp_sl_18981	C	C	C	C	A	C	C	C	C	C	C	C	C	C	C	C	C	C	C	C	M	A	A	A	M	M	A	A	A	M	A	A	A	M	A	A	M	M	M	A	A	A	A	C	A	M	M	A	A
solcap_snp_sl_30846	T	T	T	T	C	T	T	T	T	T	T	T	T	T	T	T	T	T	T	T	Y	C	C	C	Y	Y	C	C	C	Y	C	C	C	Y	C	C	Y	Y	Y	C	C	C	C	T	C	Y	Y	C	C
solcap_snp_sl_18978	G	G	G	G	A	G	G	G	G	G	G	G	G	G	G	G	G	G	G	G	R	A	A	A	R	R	A	A	A	R	A	A	A	R	A	A	R	R	R	A	A	A	A	G	A	R	R	A	A
solcap_snp_sl_30840	G	G	G	G	G	G	G	G	G	G	G	G	G	G	G	G	G	G	G	G	G	G	G	G	G	G	G	G	G	G	G	G	G	G	G	G	G	G	G	G	G	G	G	G	G	G	G	G	G
solcap_snp_sl_30839	A	A	A	A	A	A	A	A	A	A	A	A	A	A	A	A	A	A	A	A	A	A	A	A	A	A	failed	A	A	A	A	A	A	A	A	A	A	A	A	A	A	A	A	A	A	A	A	A	A
solcap_snp_sl_30838	failed	failed	failed	failed	failed	failed	failed	failed	failed	failed	failed	failed	failed	failed	failed	failed	failed	failed	failed	failed	failed	failed	failed	failed	failed	failed	failed	failed	failed	failed	failed	failed	failed	failed	failed	failed	failed	failed	failed	failed	failed	failed	failed	failed	failed	failed	failed	failed	failed
solcap_snp_sl_30833	G	G	G	G	G	G	G	G	G	G	G	G	G	G	G	G	G	G	G	G	G	G	G	G	G	G	G	G	G	G	G	G	G	G	G	G	G	G	G	G	G	G	G	G	G	G	G	G	G
SL10736_542	T	T	T	T	T	T	T	T	T	T	T	T	T	T	T	T	T	T	T	T	T	T	T	T	T	T	T	T	T	T	T	T	T	T	T	T	T	T	T	T	T	T	T	T	T	T	T	T	T
solcap_snp_sl_52373	C	C	C	C	C	C	C	C	C	C	C	C	C	C	C	C	C	C	C	C	C	C	C	C	C	C	C	C	C	C	C	C	C	C	C	C	C	C	C	C	C	C	C	C	C	C	C	C	C
solcap_snp_sl_52371	C	C	C	C	C	C	C	C	C	C	C	C	C	C	C	C	C	C	C	C	C	C	C	C	C	C	C	C	C	C	C	C	C	C	C	C	C	C	C	C	C	C	C	C	C	C	C	C	C
solcap_snp_sl_35295	T	T	T	T	T	T	T	T	T	T	T	T	T	T	T	T	T	T	T	T	T	T	T	T	T	T	T	T	T	T	T	T	T	T	T	T	T	T	T	T	T	T	T	T	T	T	T	T	T
solcap_snp_sl_35299	T	T	T	T	T	T	T	T	T	T	T	T	T	T	T	T	T	T	T	T	T	T	T	T	T	T	T	T	T	T	T	T	T	T	T	T	T	T	T	T	T	T	T	T	T	T	T	T	T
solcap_snp_sl_35303	T	T	T	T	T	T	T	T	T	T	T	T	T	T	T	T	T	T	T	T	T	T	T	T	T	T	T	T	T	T	T	T	T	T	T	T	T	T	T	T	T	T	T	T	T	T	T	T	T
SL20037_731	C	C	C	C	C	C	C	C	C	C	C	C	C	C	C	C	C	C	C	C	C	C	C	C	C	C	C	C	C	C	C	C	C	C	C	C	C	C	C	C	C	C	C	C	C	C	C	C	C
solcap_snp_sl_35313	A	A	A	A	A	A	A	A	A	A	A	A	A	A	A	A	A	A	A	A	A	A	A	A	A	A	A	A	A	A	A	A	A	A	A	A	A	A	A	A	A	A	A	A	A	A	A	A	A
solcap_snp_sl_35323	C	C	C	C	C	C	C	C	C	C	C	C	C	C	C	C	C	C	C	C	C	C	C	C	C	C	C	C	C	C	C	C	C	C	C	C	C	C	C	C	C	C	C	C	C	C	C	C	C
solcap_snp_sl_35331	C	C	C	C	C	C	C	C	C	C	C	C	C	C	C	C	C	C	C	C	C	C	C	C	C	C	C	C	C	C	C	C	C	C	C	C	C	C	C	C	C	C	C	C	C	C	C	C	C
solcap_snp_sl_35332	G	G	G	G	G	G	G	G	G	G	G	G	G	G	G	G	G	G	G	G	G	G	G	G	G	G	G	G	G	G	G	G	G	G	G	G	G	G	G	G	G	G	G	G	G	G	G	G	G
solcap_snp_sl_35333	T	T	T	T	T	T	T	T	T	T	T	T	T	T	T	T	T	T	T	T	T	T	T	T	T	T	T	T	T	T	T	T	T	T	T	T	T	T	T	T	T	T	T	T	T	T	T	T	T
solcap_snp_sl_35334	T	T	T	T	T	T	T	T	T	T	T	T	T	T	T	T	T	T	T	T	T	T	T	T	T	T	T	T	T	T	T	T	T	T	T	T	T	T	T	T	T	T	T	T	T	T	T	T	T
solcap_snp_sl_35335	A	A	A	A	A	A	A	A	A	A	A	A	A	A	A	A	A	A	A	A	A	A	A	A	A	A	A	A	A	A	A	A	A	A	A	A	A	A	A	A	A	A	A	A	A	A	A	A	A
SGN-U582610_snp835_solcap_snp_sl_35344	A	A	A	A	A	A	A	A	A	A	A	A	A	A	A	A	A	A	A	A	A	A	A	A	A	A	A	A	A	A	A	A	A	A	A	A	A	A	A	A	A	A	A	A	A	A	A	A	A
solcap_snp_sl_35345	G	G	G	G	G	G	G	G	G	G	G	G	G	G	G	G	G	G	G	G	G	G	G	G	G	G	G	G	G	G	G	G	G	G	G	G	G	G	G	G	G	G	G	G	G	G	G	G	G
solcap_snp_sl_65736	C	C	C	C	C	C	C	C	C	C	C	C	C	C	C	C	C	C	C	C	C	C	C	C	C	C	C	C	C	C	C	C	C	C	C	C	C	C	C	C	C	C	C	C	C	C	C	C	C
solcap_snp_sl_35369	G	G	G	G	G	G	G	G	G	G	G	G	G	G	G	G	G	G	G	G	G	G	G	G	G	G	G	G	G	G	G	G	G	G	G	G	G	G	G	G	G	G	G	G	G	G	G	G	G
solcap_snp_sl_65758	C	C	C	C	C	C	C	C	C	C	C	C	C	C	C	C	C	C	C	C	C	C	C	C	C	C	C	C	C	C	C	C	C	C	C	C	C	C	C	C	C	C	C	C	C	C	C	C	C
solcap_snp_sl_35382	T	T	T	T	T	T	T	T	T	T	T	T	T	T	T	T	T	T	T	T	T	T	T	T	T	T	T	T	T	T	T	T	T	T	T	T	T	T	T	T	T	T	T	T	T	T	T	T	T
solcap_snp_sl_35391	G	G	G	G	G	G	G	G	G	G	G	G	G	G	G	G	G	G	G	G	G	G	G	G	G	G	G	G	G	G	G	G	G	G	G	G	G	G	G	G	G	G	G	G	G	G	G	G	G
solcap_snp_sl_35394	G	G	G	G	G	G	G	G	G	G	G	G	G	G	G	G	G	G	G	G	G	G	G	G	G	G	G	G	G	G	G	G	G	G	G	G	G	G	G	G	G	G	G	G	G	G	G	G	G
solcap_snp_sl_35397	C	C	C	C	C	C	C	C	C	C	C	C	C	C	C	C	C	C	C	C	C	C	C	C	C	C	C	C	C	C	C	C	C	C	C	C	C	C	C	C	C	C	C	C	C	C	C	C	C
solcap_snp_sl_35407	T	T	T	T	T	T	T	T	T	T	T	T	T	T	T	T	T	T	T	T	T	T	T	T	T	T	T	T	T	T	T	T	T	T	T	T	T	T	T	T	T	T	T	T	T	T	T	T	T
solcap_snp_sl_35413	T	T	T	T	T	T	T	T	T	T	T	T	T	T	T	T	T	T	T	T	T	T	T	T	T	T	T	T	T	T	T	T	T	T	T	T	T	T	T	T	T	T	T	T	T	T	T	T	T
solcap_snp_sl_35443	C	C	C	C	C	C	C	C	C	C	C	C	C	C	C	C	C	C	C	C	C	C	C	C	C	C	C	C	C	C	C	C	C	C	C	C	C	C	C	C	C	C	C	C	C	C	C	C	C
solcap_snp_sl_35458	C	C	C	C	C	C	C	C	C	C	C	C	C	C	C	C	C	C	C	C	C	C	C	C	C	C	C	C	C	C	C	C	C	C	C	C	C	C	C	C	C	C	C	C	C	C	C	C	C
solcap_snp_sl_35459	T	T	T	T	T	T	T	T	T	T	T	T	T	T	T	T	T	T	T	T	T	T	T	T	T	T	T	T	T	T	T	T	T	T	T	T	T	T	T	T	T	T	T	T	T	T	T	T	T
solcap_snp_sl_10372	C	C	C	C	C	C	C	C	C	C	C	C	C	C	C	C	C	C	C	C	C	C	C	A	M	C	C	C	C	C	C	C	C	C	C	C	C	M	C	C	C	C	C	C	C	M	C	M	C
CL016760-0706	C	C	C	T	T	T	C	T	T	C	C	C	C	C	T	C	C	T	Y	T	T	T	T	T	T	Y	T	T	T	T	T	T	T	T	T	T	C	T	T	T	T	T	T	C	T	Y	Y	T	T
CL016760-0427	G	G	G	G	G	G	G	G	G	G	G	G	G	G	G	G	G	G	G	G	G	G	G	G	G	G	G	G	G	G	G	G	G	G	G	G	G	G	G	G	G	G	G	G	G	G	G	G	G
solcap_snp_sl_35497	C	C	C	C	C	C	C	C	C	C	C	C	C	C	C	C	C	C	C	C	C	C	C	C	C	C	C	C	C	C	C	C	C	C	C	C	C	C	C	C	C	C	C	C	C	C	C	C	C
solcap_snp_sl_10377	C	C	C	T	T	T	C	T	T	C	C	C	C	C	T	C	C	T	Y	T	T	T	T	C	Y	Y	T	T	T	T	T	T	T	T	T	T	C	Y	T	T	T	T	T	C	T	C	Y	Y	T
solcap_snp_sl_35540	G	G	G	T	T	T	G	T	T	G	G	G	G	G	T	G	G	T	K	T	T	T	T	T	T	K	T	T	T	T	T	T	T	T	T	T	G	T	T	T	T	T	T	G	T	K	K	K	T
solcap_snp_sl_21677	T	T	T	A	A	A	T	A	A	T	T	T	T	T	A	T	T	A	W	A	A	A	A	A	A	W	A	A	A	A	A	A	A	A	A	A	T	A	A	A	A	A	A	T	A	W	W	W	A
CL016938-0536	T	T	T	T	T	T	T	T	T	T	T	T	T	T	T	T	T	T	T	T	T	T	T	T	T	T	T	T	T	T	T	T	T	T	T	T	T	T	T	T	T	T	T	T	T	T	T	Y	T
solcap_snp_sl_21682	G	G	G	G	G	G	G	G	G	G	G	G	G	G	G	G	G	G	G	G	G	G	G	G	G	G	G	G	G	G	G	G	G	G	G	G	G	G	G	G	G	G	G	G	G	G	G	R	G
solcap_snp_sl_21683	C	C	C	C	C	C	C	C	C	C	C	C	C	C	C	C	C	C	C	C	C	C	C	C	C	C	C	C	C	C	C	C	C	C	C	C	C	C	C	C	C	C	C	C	C	C	C	M	C
solcap_snp_sl_21684	A	A	A	A	A	A	A	A	A	A	A	A	A	A	A	A	A	A	A	A	A	A	A	A	A	A	A	A	A	A	A	A	A	A	A	A	A	A	A	A	A	A	A	A	A	A	A	M	A
solcap_snp_sl_21685	C	C	C	C	C	C	C	C	C	C	C	C	C	C	C	C	C	C	C	C	C	C	C	C	C	C	C	C	C	C	C	C	C	C	C	C	C	C	C	C	C	C	C	C	C	C	C	S	C
CL017533-0189	T	T	T	T	T	T	T	T	T	T	T	T	T	T	T	T	T	T	T	T	T	T	T	T	T	T	T	T	T	T	T	T	T	T	T	T	T	T	T	T	T	T	T	T	T	T	T	T	T
solcap_snp_sl_35572	C	C	C	C	C	C	C	C	C	C	C	C	C	C	C	C	C	C	C	C	C	C	C	C	C	C	C	C	C	C	C	C	C	C	C	C	C	C	C	C	C	C	C	C	C	C	C	C	C
CL017725-0420	T	T	T	T	T	T	T	T	T	T	T	T	T	T	T	T	T	T	T	T	T	T	T	T	T	T	T	T	T	T	T	T	T	T	T	T	T	T	T	T	T	T	T	T	T	T	T	T	T
solcap_snp_sl_35601	A	A	A	A	A	A	A	A	A	A	A	A	A	A	A	A	A	A	A	A	A	A	A	A	A	A	A	A	A	A	A	A	A	A	A	A	A	A	A	A	A	A	A	A	A	A	A	A	A
solcap_snp_sl_21694	A	A	A	A	A	A	A	A	A	A	A	A	A	A	A	A	A	A	A	A	A	A	A	A	A	A	A	A	A	A	A	A	A	A	A	A	A	A	A	A	A	A	A	A	A	A	A	R	A
solcap_snp_sl_35619	T	T	T	T	T	T	T	T	T	T	T	T	T	T	T	T	T	T	T	T	T	T	T	T	T	T	T	T	T	T	T	T	T	T	T	T	T	T	T	T	T	T	T	T	T	T	T	T	T
solcap_snp_sl_35638	A	A	A	A	A	A	A	A	A	A	A	A	A	A	A	A	A	A	A	A	A	A	A	A	A	A	A	A	A	A	A	A	A	A	A	A	A	A	A	A	A	A	A	A	A	A	A	A	A
solcap_snp_sl_35650	A	A	A	A	A	A	A	A	A	A	A	A	A	A	A	A	A	A	A	A	A	A	A	A	R	R	A	A	A	R	A	A	A	A	A	R	A	R	R	R	R	G	R	A	A	A	R	R	G
solcap_snp_sl_35677	C	C	C	C	C	C	C	C	C	C	C	C	C	C	C	C	C	C	C	C	C	C	C	C	C	C	C	C	C	C	C	C	C	C	C	C	C	C	C	C	C	C	C	C	C	C	C	C	C
CL009162-0240	G	G	G	G	G	G	G	G	G	G	G	G	G	G	G	G	G	G	G	G	G	G	G	G	G	G	G	G	G	G	G	G	G	G	G	G	G	G	G	G	G	G	G	G	G	G	G	G	G
solcap_snp_sl_35693	T	T	T	T	T	T	T	T	T	T	T	T	T	T	T	T	T	T	T	T	T	T	T	T	T	T	T	T	T	T	T	T	T	T	T	T	T	T	T	T	T	T	T	T	T	T	T	T	T
solcap_snp_sl_35697	A	A	A	A	A	A	A	A	A	A	A	A	A	A	A	A	A	A	A	A	A	A	A	A	A	A	A	A	A	A	A	A	A	A	A	A	A	A	A	A	A	A	A	A	A	A	A	A	A
solcap_snp_sl_21714	T	T	T	T	T	T	T	T	T	T	T	T	T	T	T	T	T	T	T	T	T	T	T	T	T	T	T	T	T	T	T	T	T	T	T	T	T	T	T	T	T	A	T	T	T	T	T	W	A
solcap_snp_sl_25390	G	G	G	G	G	G	G	G	G	G	G	G	G	G	G	G	G	G	G	G	G	G	G	G	G	G	G	G	G	G	G	G	G	G	G	G	G	G	G	G	G	A	G	G	G	G	G	R	A
solcap_snp_sl_65873	G	G	G	G	G	G	G	G	G	G	G	G	G	G	G	G	G	G	G	G	G	G	G	G	G	G	G	G	G	G	G	G	G	G	G	G	G	G	G	G	G	G	G	G	G	G	G	G	G
solcap_snp_sl_35720	C	C	C	C	C	C	C	C	C	C	C	C	C	C	C	C	C	C	C	C	C	C	C	C	C	C	C	C	C	C	C	C	C	C	C	C	C	C	C	C	C	C	C	C	C	C	C	C	C
solcap_snp_sl_65880	G	G	G	G	G	G	G	G	G	G	G	G	G	G	G	G	G	G	G	G	G	G	G	G	G	G	G	G	G	G	G	G	G	G	G	G	G	G	G	G	G	G	G	G	G	G	G	G	G
CL015971-0495	T	T	T	T	T	T	T	T	T	T	T	T	T	T	T	T	T	T	T	T	T	T	T	T	T	T	T	T	T	T	T	T	T	T	T	T	T	T	T	T	T	T	Y	T	T	T	T	T	T
CL015971-0443	T	T	T	T	T	T	T	T	T	T	T	T	T	T	T	T	T	T	T	T	T	T	T	T	T	T	T	T	T	T	T	T	T	T	T	T	T	T	T	T	T	T	T	T	T	T	T	T	T
solcap_snp_sl_65890	T	T	T	T	T	T	T	T	T	T	T	T	T	T	T	T	T	T	T	T	T	T	T	T	T	T	T	T	T	T	T	T	T	T	T	T	T	T	T	T	T	T	T	T	T	T	T	T	T
solcap_snp_sl_31018	A	A	A	A	A	A	A	A	A	A	A	A	A	A	A	A	A	A	A	A	A	A	A	A	A	A	A	A	A	A	A	A	A	A	A	A	A	A	A	A	A	A	A	A	A	A	A	A	A
solcap_snp_sl_58651	G	G	G	G	G	G	G	G	G	G	G	G	G	G	G	G	G	G	G	G	G	G	G	G	G	G	G	G	G	G	G	G	G	G	G	G	G	G	G	G	G	G	G	G	G	G	G	G	G
solcap_snp_sl_20088	A	A	A	A	A	A	A	A	A	A	A	A	A	A	A	A	A	A	A	A	A	A	A	G	A	A	A	A	A	R	A	A	A	A	A	A	A	R	R	A	R	G	R	A	A	A	R	A	G
solcap_snp_sl_14715	T	T	T	T	T	T	T	T	T	T	T	T	T	T	T	T	T	T	T	T	T	T	T	A	T	T	T	T	T	T	T	W	T	T	T	T	T	T	T	T	T	T	W	T	T	T	T	T	T
solcap_snp_sl_14714	C	C	C	C	C	C	C	C	C	C	C	C	C	C	C	C	C	C	C	C	C	C	C	G	C	C	C	C	C	C	C	S	C	C	C	C	C	C	C	C	C	C	S	C	C	C	C	C	C
solcap_snp_sl_58630	G	G	G	G	G	G	G	G	G	G	G	G	G	G	G	G	G	G	G	G	G	G	G	G	G	G	G	G	G	G	G	G	G	G	G	G	G	G	G	G	G	G	G	G	G	G	G	G	G
solcap_snp_sl_58614	A	A	A	A	A	A	A	A	A	A	A	A	A	A	A	A	A	A	A	A	A	A	A	A	A	A	A	A	A	A	A	A	A	A	A	A	A	A	A	A	A	A	A	A	A	A	A	A	A
solcap_snp_sl_7942	C	C	C	C	C	C	C	C	C	C	C	C	C	C	C	C	C	C	C	C	C	Y	C	T	Y	Y	Y	Y	Y	Y	C	Y	C	T	Y	T	C	Y	Y	C	Y	T	Y	Y	C	C	Y	Y	T
solcap_snp_sl_7940	A	A	A	A	A	A	A	A	A	A	A	A	A	A	A	A	A	A	A	A	A	A	A	C	A	A	A	A	A	A	A	A	A	A	A	A	A	A	A	A	A	A	A	A	A	A	A	A	A
solcap_snp_sl_7939	A	A	A	A	A	A	A	A	A	A	A	A	A	A	A	A	A	A	A	A	A	A	A	G	A	A	A	A	A	A	A	A	A	A	A	A	A	A	A	A	A	A	A	A	A	A	A	A	A
solcap_snp_sl_58584	G	G	G	G	G	G	G	G	G	G	G	G	G	G	G	G	G	G	G	G	G	G	G	G	G	G	G	G	G	G	G	G	G	G	G	G	G	G	G	G	G	G	G	G	G	G	G	G	G
solcap_snp_sl_58550	G	G	G	G	G	G	G	G	G	G	G	G	G	G	G	G	G	G	G	G	G	G	G	G	G	G	G	G	G	G	G	G	G	G	G	G	G	G	G	G	G	G	G	G	G	G	G	G	G
solcap_snp_sl_7919	A	A	A	A	A	A	A	A	A	A	A	A	A	A	A	A	A	A	G	A	R	R	A	G	A	R	R	R	A	A	A	A	A	G	R	A	A	A	A	A	A	A	R	A	A	A	A	R	A
solcap_snp_sl_58518	C	C	C	C	C	C	C	C	C	C	C	C	C	C	C	C	C	C	C	C	C	C	C	C	C	C	C	C	C	C	C	C	C	C	C	C	C	C	C	C	C	C	C	C	C	C	C	C	C
solcap_snp_sl_20069	C	C	C	C	C	C	C	C	C	C	C	C	C	C	C	C	C	C	C	C	C	C	C	C	C	C	C	C	C	C	C	C	C	C	C	C	C	C	C	C	C	C	C	C	C	C	C	C	C
solcap_snp_sl_15960	C	C	C	C	C	C	C	C	C	C	C	C	C	C	C	C	C	C	C	C	C	C	C	A	C	C	C	C	C	C	C	C	C	C	C	C	C	C	C	C	C	C	C	C	C	C	C	C	C
CL017449-0340	T	T	T	T	T	T	T	T	T	T	T	T	T	T	T	T	T	T	T	T	T	T	T	T	T	T	T	T	T	T	T	T	T	T	T	T	T	T	T	T	T	T	T	T	T	T	T	T	T
solcap_snp_sl_69353	T	T	T	T	T	T	T	T	T	T	T	T	T	T	T	T	T	T	T	T	T	T	T	T	T	T	T	T	T	T	T	T	T	T	T	T	T	T	T	T	T	T	T	T	T	T	T	T	T
solcap_snp_sl_11602	T	T	T	T	T	T	T	T	T	T	T	T	T	T	T	T	T	T	C	T	Y	Y	T	C	T	Y	Y	Y	T	T	T	Y	T	C	Y	T	T	T	T	T	T	Y	Y	C	T	T	T	Y	C
solcap_snp_sl_62544	C	C	C	C	C	C	C	C	C	C	C	C	C	C	C	C	C	C	C	C	C	C	C	C	C	C	C	C	C	C	C	C	C	C	C	C	C	C	C	C	C	C	C	C	C	C	C	C	C
solcap_snp_sl_9391	A	A	A	A	A	A	A	A	A	A	A	A	A	A	A	A	A	A	A	A	A	A	A	T	A	A	A	A	A	A	A	A	A	A	A	A	A	A	A	A	A	A	A	A	A	A	A	A	A
solcap_snp_sl_9385	A	A	A	A	A	A	A	A	A	A	A	A	A	A	A	A	A	A	A	A	A	A	A	C	A	A	A	A	A	A	A	A	A	A	A	A	A	A	A	A	A	A	A	A	A	A	A	A	A
solcap_snp_sl_62531	T	T	T	T	T	T	T	T	T	T	T	T	T	T	T	T	T	T	T	T	T	T	T	T	T	T	T	T	T	T	T	T	T	T	T	T	T	T	T	T	T	T	T	T	T	T	T	T	T
solcap_snp_sl_9383	G	G	G	G	G	G	G	G	G	G	G	G	G	G	G	G	G	G	G	G	G	G	G	A	G	G	G	G	G	G	G	G	G	G	G	G	G	G	G	G	G	R	G	G	G	G	G	G	A
solcap_snp_sl_9382	A	A	A	A	A	A	A	A	A	A	A	A	A	A	A	A	A	A	A	A	A	A	A	G	A	A	A	A	A	A	A	A	A	A	A	A	A	A	A	A	A	R	A	A	A	A	A	A	G
solcap_snp_sl_9381	T	T	T	T	T	T	T	T	T	T	T	T	T	T	T	T	T	T	T	T	T	T	T	A	T	T	T	T	T	T	T	T	T	T	T	T	T	T	T	T	T	T	T	T	T	T	T	T	W
solcap_snp_sl_20937	G	G	G	G	G	G	G	G	G	G	G	G	G	G	G	G	G	G	G	G	G	G	G	A	G	G	G	G	G	G	G	G	G	G	G	G	G	G	G	G	G	G	G	G	G	G	G	G	R
solcap_snp_sl_20936	T	T	T	T	T	T	T	T	T	T	T	T	T	T	T	T	T	T	T	T	T	T	T	C	T	T	T	T	T	T	T	T	T	T	T	T	T	T	T	T	T	T	T	T	T	T	T	T	Y
solcap_snp_sl_62520	T	T	T	T	T	T	T	T	T	T	T	T	T	T	T	T	T	T	T	T	T	T	T	T	T	T	T	T	T	T	T	T	T	T	T	T	T	T	T	T	T	T	T	T	T	T	T	T	T
solcap_snp_sl_9379	A	C	C	M	C	C	A	C	C	A	A	C	A	A	C	C	A	C	C	C	C	C	C	C	C	C	M	C	C	M	C	M	M	C	C	C	C	C	M	M	C	C	C	C	C	C	C	C	C
solcap_snp_sl_20933	G	G	G	G	G	G	G	G	G	G	G	G	G	G	G	G	G	G	G	G	G	G	G	G	S	G	G	G	G	G	G	S	G	G	G	S	G	G	G	G	G	G	G	S	G	G	G	G	G
solcap_snp_sl_9377	T	T	T	T	T	T	T	T	T	T	T	T	T	T	T	T	T	T	T	T	T	T	T	A	T	T	T	T	T	T	T	T	T	T	T	T	T	T	T	T	T	T	T	T	T	T	T	T	W
solcap_snp_sl_20932	G	G	G	G	G	G	G	G	G	G	G	G	G	G	G	G	G	G	G	G	R	R	G	G	R	G	R	R	G	G	G	R	G	A	R	R	G	G	G	G	G	G	R	G	G	G	G	R	G
solcap_snp_sl_62499	T	T	T	T	T	T	T	T	T	T	T	T	T	T	T	T	T	T	T	T	T	T	T	T	T	T	T	T	T	T	T	T	T	T	T	T	T	T	T	T	T	T	T	T	T	T	T	T	T
CL015346-0143_solcap_snp_sl_62495	G	G	G	G	G	G	G	G	G	G	G	G	G	G	G	G	G	G	G	G	G	G	G	G	G	G	G	G	G	G	G	G	G	G	G	G	G	G	G	G	G	C	G	G	G	S	G	G	S
CL015346-0229	G	G	G	G	G	G	G	G	G	G	G	G	G	G	G	G	G	G	G	G	G	G	G	G	G	G	G	G	G	G	G	G	G	G	G	G	G	G	G	G	G	G	G	G	G	G	G	G	G
solcap_snp_sl_9372	C	C	C	C	C	C	C	C	C	C	C	C	C	C	C	C	C	C	C	C	C	C	C	A	C	C	C	C	C	C	C	C	C	C	C	C	C	C	C	C	C	C	C	C	C	C	C	C	M
CL015371-0327	T	T	T	T	T	T	T	T	T	T	T	T	T	T	T	T	T	T	T	T	T	T	T	T	T	T	T	T	T	T	T	T	T	T	T	T	T	T	T	T	T	T	T	T	T	T	T	T	T
solcap_snp_sl_62473	G	G	G	G	G	G	G	G	G	G	G	G	G	G	G	G	G	G	G	G	G	G	G	G	G	G	G	G	G	G	G	G	G	G	G	G	G	G	G	G	G	A	G	G	G	R	G	G	R
solcap_snp_sl_9366	A	A	A	A	A	A	A	A	A	A	A	A	A	A	A	A	A	A	A	A	W	W	A	T	W	A	W	W	A	A	A	W	A	T	W	W	A	A	A	A	A	A	W	A	A	A	A	W	W
SGN-U565563_snp1042_solcap_snp_sl_62467	C	C	C	C	C	C	C	C	C	C	C	C	C	C	C	C	C	C	C	C	C	C	C	C	C	C	C	C	C	C	C	C	C	C	C	C	C	C	C	C	C	T	C	C	C	Y	C	C	Y
CL016891-0260	A	A	A	A	A	A	A	A	A	A	A	A	A	A	A	A	A	A	A	A	A	A	A	A	A	A	A	A	A	A	A	A	A	A	A	A	A	A	A	A	A	G	A	A	A	R	A	A	R
CL016891-0194	A	A	A	A	A	A	A	A	A	A	A	A	A	A	A	A	A	A	A	A	A	A	A	A	A	A	A	A	A	A	A	A	A	A	A	A	A	A	A	A	A	A	A	A	A	A	A	A	A
CL015455-0169	T	T	T	T	T	T	T	T	T	T	T	T	T	T	T	T	T	T	T	T	T	T	T	T	T	T	T	T	T	T	T	T	T	T	T	T	T	T	T	T	T	C	T	C	T	Y	T	T	Y
solcap_snp_sl_62444	G	G	G	G	G	G	G	G	G	G	G	G	G	G	G	G	G	G	G	G	G	G	G	G	G	G	G	G	G	G	G	G	G	G	G	G	G	G	G	G	G	T	G	G	G	K	G	G	T
solcap_snp_sl_62409	C	C	C	C	C	C	C	C	C	C	C	C	C	C	C	C	C	C	C	C	C	C	C	C	C	C	C	C	C	C	C	C	C	C	C	C	C	C	C	C	C	A	C	C	C	C	C	C	A
CL017416-0060	A	A	A	A	A	A	A	A	A	A	A	A	A	A	A	A	A	A	A	A	A	A	A	A	A	A	A	A	A	A	A	A	A	A	A	A	A	A	A	A	A	A	A	A	A	A	A	A	A
CL017416-0406	T	T	T	T	T	T	T	T	T	T	T	T	T	T	T	T	T	T	T	T	T	T	T	T	T	T	T	T	T	T	T	T	T	T	T	T	T	T	T	T	T	G	T	G	T	T	T	T	G
solcap_snp_sl_9344	G	G	G	G	G	G	G	G	G	G	G	G	G	G	G	G	G	G	G	G	G	G	G	A	G	G	G	G	G	G	G	G	G	G	G	G	G	G	G	G	G	G	G	G	G	G	G	G	G
SL10909_238	G	G	G	G	G	G	G	G	G	G	G	G	G	G	G	G	G	G	G	G	G	G	G	G	G	G	G	G	G	G	G	G	G	G	G	G	G	G	G	G	G	A	G	A	G	G	G	G	A
solcap_snp_sl_62377	T	T	T	T	T	T	T	T	T	T	T	T	T	T	T	T	T	T	T	T	T	T	T	T	T	T	T	T	T	T	T	T	T	T	T	T	T	T	T	T	T	G	T	G	T	T	T	T	G
CL015860-0475	G	G	G	G	G	G	G	G	G	G	G	G	G	G	G	G	G	G	G	G	G	G	G	G	G	G	G	G	G	G	G	G	G	G	G	G	G	G	G	G	G	A	G	A	G	G	G	G	A
CL017298-0054_solcap_snp_sl_62362	T	T	T	T	T	T	T	T	T	T	T	T	T	T	T	T	T	T	T	T	T	T	T	T	T	T	T	T	T	T	T	T	T	T	T	T	T	T	T	T	T	G	T	G	T	T	T	T	G
CL017298-0393	T	T	T	T	T	T	T	T	T	T	T	T	T	T	T	T	T	T	T	T	T	T	T	T	T	T	T	T	T	T	T	T	T	T	T	T	T	T	T	T	T	T	T	T	T	T	T	T	T
SL10206_98	C	C	C	C	C	C	C	C	C	C	C	C	C	C	C	C	C	C	C	C	C	C	C	C	C	C	C	C	C	C	C	C	C	C	C	C	C	C	C	C	C	C	C	C	C	C	C	C	C
solcap_snp_sl_62348	G	G	G	G	G	G	G	G	G	G	G	G	G	G	G	G	G	G	G	G	G	G	G	G	G	G	G	G	G	G	G	G	G	G	G	G	G	G	G	G	G	T	G	T	G	G	G	G	T
solcap_snp_sl_62336	G	G	G	G	G	G	G	G	G	G	G	G	G	G	G	G	G	G	G	G	G	G	G	G	G	G	G	G	G	G	G	G	G	G	G	G	G	G	G	G	G	A	G	A	G	G	G	R	A
SL10450_71	T	T	T	T	T	T	T	T	T	T	T	T	T	T	T	T	T	T	T	T	T	T	T	T	T	T	T	T	T	T	T	T	T	T	T	T	T	T	T	T	T	C	T	C	T	T	T	Y	C
solcap_snp_sl_62300	C	C	C	C	C	C	C	C	C	C	C	C	C	C	C	C	C	C	C	C	C	C	C	C	C	C	C	C	C	C	C	C	C	C	C	C	C	C	C	C	C	T	C	T	C	C	C	Y	T
solcap_snp_sl_20895	C	C	C	C	C	C	C	C	C	C	C	C	C	C	C	C	C	C	C	C	C	C	C	C	M	C	C	C	C	C	C	M	C	C	C	M	C	C	C	C	C	C	C	C	C	C	C	C	C
solcap_snp_sl_62270	A	A	A	A	A	A	A	A	A	A	A	A	A	A	A	A	A	A	A	A	A	A	A	A	A	A	A	A	A	A	A	A	A	A	A	A	A	A	A	A	A	C	A	A	A	A	A	M	C
CL004545-0306	T	T	T	T	T	T	T	T	T	T	T	T	T	T	T	T	T	T	T	T	T	T	T	T	T	T	T	T	T	T	T	T	T	T	T	T	T	T	T	T	T	T	T	T	T	T	T	T	T
solcap_snp_sl_62259	C	C	C	C	C	C	C	C	C	C	C	C	C	C	C	C	C	C	C	C	C	C	C	C	C	C	C	C	C	C	C	C	C	C	C	C	C	C	C	C	C	T	C	C	C	C	C	failed	T
solcap_snp_sl_62245	C	C	C	C	C	C	C	C	C	C	C	C	C	C	C	C	C	C	C	C	C	C	C	C	C	C	C	C	C	C	C	C	C	C	C	C	C	C	C	C	C	T	C	C	C	C	C	Y	T
solcap_snp_sl_62228	A	A	A	A	A	A	A	A	A	A	A	A	A	A	A	A	A	A	A	A	A	A	A	A	A	A	A	A	A	A	A	A	A	A	A	A	A	A	A	A	A	G	A	A	A	A	A	R	G
solcap_snp_sl_9298	T	T	T	T	C	T	T	T	T	T	T	T	T	T	T	T	T	T	T	T	T	T	T	C	Y	T	T	T	T	T	T	Y	Y	T	T	Y	Y	T	T	T	T	C	T	C	T	T	T	Y	C
solcap_snp_sl_62224	G	G	G	G	A	G	G	G	G	G	G	G	G	G	G	G	G	G	G	G	G	G	G	A	R	G	G	G	G	G	G	R	R	G	G	R	R	G	G	G	G	G	G	A	G	G	G	G	G
solcap_snp_sl_20883	C	C	C	C	C	C	C	C	C	C	C	C	C	C	C	C	C	C	C	C	C	C	C	C	Y	C	C	C	C	C	C	Y	C	C	C	Y	C	C	C	C	C	C	C	C	C	C	C	C	C
solcap_snp_sl_62209	T	T	T	T	T	T	T	T	T	T	T	T	T	T	T	T	T	T	T	T	T	T	T	T	T	T	T	T	T	T	T	T	T	T	T	T	T	T	T	T	T	C	T	T	T	T	T	Y	C
solcap_snp_sl_9292	C	C	C	C	A	C	C	C	C	C	C	C	C	C	C	C	C	C	C	C	C	C	C	A	C	C	C	C	C	C	C	C	M	C	C	C	M	C	C	C	C	A	C	A	C	C	C	M	A
solcap_snp_sl_62180	T	T	T	T	T	T	T	T	T	T	T	T	T	T	T	T	T	T	T	T	T	T	T	T	T	T	T	T	T	T	T	T	T	T	T	T	T	T	T	T	T	C	T	T	T	T	T	Y	C
solcap_snp_sl_62166	G	G	G	G	G	G	G	G	G	G	G	G	G	G	G	G	G	G	G	G	G	G	G	G	G	G	G	G	G	G	G	G	G	G	G	G	G	G	G	G	G	A	G	G	G	G	G	R	A
solcap_snp_sl_34221	G	G	G	G	G	G	G	G	G	G	G	G	G	G	G	G	G	G	G	G	G	G	G	G	G	G	G	G	G	G	G	G	G	G	G	G	G	G	G	G	G	G	G	G	G	G	G	G	G
CL015369-0414	C	C	C	C	C	C	C	C	C	C	C	C	C	C	C	C	C	C	C	C	C	C	C	C	C	C	C	C	C	C	C	C	C	C	C	C	C	C	C	C	C	C	C	C	C	C	C	C	C
solcap_snp_sl_62133	C	C	C	C	C	C	C	C	C	C	C	C	C	C	C	C	C	C	C	C	C	C	C	C	C	C	C	C	C	C	C	C	C	C	C	C	C	C	C	C	C	C	C	C	C	C	C	C	C
CL017463-0220_solcap_snp_sl_62120	T	T	T	T	T	T	T	T	T	T	T	T	T	T	T	T	T	T	T	T	T	T	T	T	T	T	T	T	T	T	T	T	T	T	T	T	T	T	T	T	T	T	T	T	T	T	T	T	T
solcap_snp_sl_9260	T	T	T	T	T	T	T	T	T	T	T	T	T	T	T	T	T	T	T	T	T	T	T	A	T	T	T	T	T	T	T	T	T	T	T	T	T	T	T	T	T	T	T	T	T	T	T	T	T
solcap_snp_sl_34216	T	T	T	T	T	T	T	T	T	T	T	T	T	T	T	T	T	T	T	T	T	T	T	T	T	T	T	T	T	T	T	T	T	T	T	T	T	T	T	T	T	T	T	T	T	T	T	T	T
solcap_snp_sl_34213	C	C	C	C	C	C	C	C	C	C	C	C	C	C	C	C	C	C	C	C	C	C	C	C	C	C	C	C	C	C	C	C	C	C	C	C	C	C	C	C	C	C	C	C	C	C	C	C	C
solcap_snp_sl_34210	T	T	T	T	T	T	T	T	T	T	T	T	T	T	T	T	T	T	T	T	T	T	T	T	T	T	T	T	T	T	T	T	T	T	T	T	T	T	T	T	T	T	T	T	T	T	T	T	T
solcap_snp_sl_34207	C	C	C	C	C	C	C	C	C	C	C	C	C	C	C	C	C	C	C	C	C	C	C	C	C	C	C	C	C	C	C	C	C	C	C	C	C	C	C	C	C	C	C	C	C	C	C	C	C
solcap_snp_sl_34206	C	C	C	C	C	C	C	C	C	C	C	C	C	C	C	C	C	C	C	C	C	C	C	C	C	C	C	C	C	C	C	C	C	C	C	C	C	C	C	C	C	C	C	C	C	C	C	C	C
solcap_snp_sl_34205	T	T	T	T	T	T	T	T	T	T	T	T	T	T	T	T	T	T	T	T	T	T	T	T	T	T	T	T	T	T	T	T	T	T	T	T	T	T	T	T	T	T	T	T	T	T	T	T	T
solcap_snp_sl_34204	C	C	C	C	C	C	C	C	C	C	C	C	C	C	C	C	C	C	C	C	C	C	C	C	C	C	C	C	C	C	C	C	C	C	C	C	C	C	C	C	C	C	C	C	C	C	C	C	C
solcap_snp_sl_34203	T	T	T	T	T	T	T	T	T	T	T	T	T	T	T	T	T	T	T	T	T	T	T	T	T	T	T	T	T	T	T	T	T	T	T	T	T	T	T	T	T	T	T	T	T	T	T	T	T
solcap_snp_sl_34202	T	T	T	T	T	T	T	T	T	T	T	T	T	T	T	T	T	T	T	T	T	T	T	T	T	T	T	T	T	T	T	T	T	T	T	T	T	T	T	T	T	T	T	T	T	T	T	T	T
solcap_snp_sl_9253	C	C	C	C	C	C	C	C	C	C	C	C	C	C	C	C	C	C	C	C	C	C	C	T	C	C	C	C	C	C	C	C	C	C	C	C	C	C	C	C	C	C	C	C	C	C	C	C	C
solcap_snp_sl_34200	A	A	A	A	A	A	A	A	A	A	A	A	A	A	A	A	A	A	A	A	A	A	A	A	A	A	A	A	A	A	A	A	A	A	A	A	A	A	A	A	A	A	A	A	A	A	A	A	A
solcap_snp_sl_34199	A	A	A	A	A	A	A	A	A	A	A	A	A	A	A	A	A	A	A	A	A	A	A	A	A	A	A	A	A	A	A	A	A	A	A	A	A	A	A	A	A	A	A	A	A	A	A	A	A
solcap_snp_sl_9252	A	A	A	A	A	A	A	A	A	A	A	A	A	A	A	A	A	A	A	A	A	A	A	C	A	A	A	A	A	A	A	A	A	A	A	A	A	A	A	A	A	A	A	A	A	A	A	A	A
solcap_snp_sl_34196	A	A	A	A	A	A	A	A	A	A	A	A	A	A	A	A	A	A	A	A	A	A	A	A	A	A	A	A	A	A	A	A	A	A	A	A	A	A	A	A	A	A	A	A	A	A	A	A	A
solcap_snp_sl_34195	G	G	G	G	G	G	G	G	G	G	G	G	G	G	G	G	G	G	G	G	G	G	G	G	G	G	G	G	G	G	G	G	G	G	G	G	G	G	G	G	G	G	G	G	G	G	G	G	G
solcap_snp_sl_34193	C	C	C	C	C	C	C	C	C	C	C	C	C	C	C	C	C	C	C	C	C	C	C	C	C	C	C	C	C	C	C	C	C	C	C	C	C	C	C	C	C	C	C	C	C	C	C	C	C
solcap_snp_sl_34187	G	G	G	G	G	G	G	G	G	G	G	G	G	G	G	G	G	G	G	G	G	G	G	G	G	G	G	G	G	G	G	G	G	G	G	G	G	G	G	G	G	G	G	G	G	G	G	G	G
solcap_snp_sl_34186	G	G	G	G	G	G	G	G	G	G	G	G	G	G	G	G	G	G	G	G	G	G	G	G	G	G	G	G	G	G	G	G	G	G	G	G	G	G	G	G	G	G	G	G	G	G	G	G	G
CL015171-0072	T	T	T	T	T	T	T	T	T	T	T	T	T	T	T	T	T	T	T	T	T	T	T	T	T	T	T	T	T	T	T	T	T	T	T	T	T	T	T	T	T	T	T	T	T	T	T	T	T
CL015171-0254	T	T	C	Y	T	C	T	C	C	T	T	C	C	T	C	C	Y	C	T	C	Y	Y	T	T	Y	C	C	Y	T	Y	C	T	Y	T	Y	Y	Y	C	Y	Y	C	T	C	T	Y	Y	C	Y	T
solcap_snp_sl_34177	A	A	A	A	A	A	A	A	A	A	A	A	A	A	A	A	A	A	A	A	A	A	A	A	A	A	A	A	A	A	A	A	A	A	A	A	A	A	A	A	A	A	A	A	A	A	A	A	A
solcap_snp_sl_34175	A	A	A	A	A	A	A	A	A	A	A	A	A	A	A	A	A	A	A	A	A	A	A	A	A	A	A	A	A	A	A	A	A	A	A	A	A	A	A	A	A	A	A	A	A	A	A	A	A
solcap_snp_sl_62037	C	C	C	C	T	C	C	C	C	C	C	C	C	C	C	C	C	C	T	C	Y	Y	T	T	Y	C	C	Y	T	C	C	T	Y	T	Y	Y	Y	Y	Y	Y	C	T	C	T	Y	Y	Y	T	T
solcap_snp_sl_9244	G	G	G	G	G	G	G	G	G	G	G	G	G	G	G	G	G	G	G	G	G	G	G	A	G	G	G	G	G	G	G	G	G	G	G	G	G	G	G	G	G	G	G	G	G	G	G	G	G
solcap_snp_sl_9241	A	A	A	A	A	A	A	A	A	A	A	A	A	A	A	A	A	A	T	A	A	A	A	A	A	A	A	A	T	A	A	W	A	A	W	A	W	W	A	W	A	W	A	T	W	W	W	T	T
solcap_snp_sl_9238	G	G	G	G	A	G	G	G	G	G	G	G	G	G	G	G	G	G	A	G	R	R	A	G	R	G	G	R	A	G	G	A	G	A	R	R	R	R	failed	R	G	A	G	A	R	R	R	R	A
solcap_snp_sl_9237	T	T	T	T	T	T	T	T	T	T	T	T	T	T	T	T	T	T	T	T	T	T	T	C	T	T	T	T	T	T	T	T	T	T	T	T	T	T	T	T	T	T	T	T	T	T	T	T	T
solcap_snp_sl_9235	A	A	A	A	A	A	A	A	A	A	A	A	A	A	A	A	A	A	A	A	A	A	A	G	A	A	A	A	A	A	A	A	A	A	A	A	A	A	A	A	A	A	A	A	A	A	A	A	A
CL016051-0063	A	A	A	A	A	A	A	A	A	A	A	A	A	A	A	A	A	A	A	A	A	A	A	A	A	A	A	A	A	A	A	A	A	A	A	A	A	A	A	A	A	A	A	A	A	A	A	A	A
solcap_snp_sl_20865	T	T	T	T	T	T	T	T	T	T	T	T	T	T	T	T	T	T	T	T	T	T	T	C	T	T	T	T	T	T	T	T	T	T	T	T	T	T	T	T	T	T	T	T	T	T	T	T	T
solcap_snp_sl_9229	G	G	G	G	G	G	G	G	G	G	G	G	G	G	G	G	G	G	G	G	G	G	G	A	G	G	G	G	G	G	G	G	G	G	G	G	G	G	G	G	G	G	G	G	G	G	G	G	G
solcap_snp_sl_9228	G	G	G	G	G	G	G	G	G	G	G	G	G	G	G	G	G	G	G	G	G	G	G	A	G	G	G	G	G	G	G	G	G	G	G	G	G	G	G	G	G	G	G	G	G	G	G	G	G
solcap_snp_sl_62008	C	C	C	C	T	C	C	C	C	C	C	C	C	C	C	C	C	C	T	C	Y	Y	T	T	Y	C	C	Y	T	C	C	T	C	T	Y	Y	Y	Y	Y	Y	C	T	C	T	Y	Y	Y	Y	T
solcap_snp_sl_9226	A	A	A	A	G	A	A	A	A	A	A	A	A	A	A	A	A	A	G	A	R	R	G	A	R	A	A	R	G	A	A	G	A	G	R	R	R	R	R	R	A	G	A	G	R	R	R	R	G
solcap_snp_sl_9218	T	T	T	T	A	T	T	T	T	T	T	T	T	T	T	T	T	T	A	T	W	W	A	T	W	T	T	W	A	T	T	A	T	W	W	W	W	W	W	W	T	A	T	A	W	W	A	W	A
solcap_snp_sl_24926	A	A	A	A	A	A	A	A	A	A	A	A	A	A	A	A	A	A	A	A	A	A	A	T	A	A	A	A	A	A	A	A	A	A	A	A	A	A	A	A	A	A	A	A	A	A	A	A	A
CL015437-0110_solcap_snp_sl_61967	A	A	A	A	G	A	A	A	A	A	A	A	A	A	A	A	A	A	G	A	R	R	G	G	R	A	A	R	G	A	A	G	A	R	R	R	R	R	R	R	A	G	A	G	R	R	G	G	G
solcap_snp_sl_34165	C	C	C	C	C	C	C	C	C	C	C	C	C	C	C	C	C	C	C	C	C	C	C	C	C	C	C	C	C	C	C	C	C	C	C	C	C	C	C	C	C	C	C	C	C	C	C	C	C
solcap_snp_sl_34163	C	C	C	C	T	C	C	C	C	C	C	C	C	C	C	C	C	C	T	C	Y	Y	T	T	Y	C	C	Y	T	Y	C	T	C	Y	T	Y	Y	T	Y	Y	T	T	C	T	Y	Y	T	T	T
SGN-U584349_snp118	A	A	A	A	A	A	A	A	A	A	A	A	A	A	A	A	A	A	A	A	A	A	A	A	A	A	A	A	A	A	A	A	A	A	A	A	A	A	A	A	A	A	A	A	A	A	A	A	A
solcap_snp_sl_61938	C	C	C	C	T	C	C	C	C	C	C	C	C	C	C	C	C	C	T	C	Y	Y	T	T	Y	Y	C	Y	T	Y	C	T	C	Y	T	Y	Y	T	Y	Y	T	T	C	T	Y	Y	T	T	T
SGN-U565536_snp46769	T	T	T	T	G	T	T	T	T	T	T	T	T	T	T	T	T	T	G	T	K	K	G	G	K	K	T	K	G	K	T	G	T	K	G	K	K	G	K	K	G	G	T	G	K	K	G	G	G
SGN-U604240_snp45533	A	A	A	A	G	A	A	A	A	A	A	A	A	A	A	A	A	A	G	A	R	R	G	G	R	R	A	R	G	R	A	G	A	R	G	R	R	G	R	R	G	G	A	G	R	R	G	G	G
SGN-U604240_snp45509	A	A	A	A	T	A	A	A	A	A	A	A	A	A	A	A	A	A	T	A	W	W	T	T	W	W	A	W	T	W	A	T	A	W	T	W	W	T	W	W	T	T	A	T	W	W	T	T	T
CL017760-0371_solcap_snp_sl_61928	T	T	T	T	G	T	T	T	T	T	T	T	T	T	T	T	T	T	G	T	K	K	G	G	K	K	T	K	G	K	T	G	T	K	G	K	K	G	K	K	G	G	T	G	K	K	G	G	G
CL017760-0099	C	C	C	C	C	C	C	C	C	C	C	C	C	C	C	C	C	C	C	C	C	C	C	C	C	C	C	C	C	C	C	C	C	C	C	C	C	C	C	C	C	C	C	C	C	C	C	C	C
solcap_snp_sl_20846	failed	failed	failed	failed	failed	failed	failed	failed	failed	failed	failed	failed	failed	failed	failed	failed	failed	failed	failed	failed	failed	failed	failed	failed	failed	failed	failed	failed	failed	failed	failed	failed	failed	failed	failed	failed	failed	failed	failed	failed	failed	failed	failed	failed	failed	failed	failed	failed	failed
CL015662-0214	T	T	T	T	C	T	T	T	T	T	T	T	T	T	T	T	T	T	C	T	Y	Y	C	C	Y	Y	T	Y	C	Y	T	C	T	Y	C	Y	Y	Y	Y	Y	C	C	T	C	Y	Y	C	C	C
solcap_snp_sl_34143	C	C	C	C	C	C	C	C	C	C	C	C	C	C	C	C	C	C	C	C	C	C	C	C	C	C	C	C	C	C	C	C	C	C	C	C	C	C	C	C	C	C	C	C	C	C	C	C	C
SGN-U579212_snp23699	T	T	T	T	T	T	T	T	T	T	T	T	T	T	T	T	T	T	T	T	T	T	T	T	T	T	T	T	T	T	T	T	T	T	T	T	T	T	T	T	T	T	T	T	T	T	T	T	T
SGN-U579212_snp24949	A	A	A	A	A	A	A	A	A	A	A	A	A	A	A	A	A	A	A	A	A	A	A	A	A	A	A	A	A	A	A	A	A	A	A	A	A	A	A	A	A	A	A	A	A	A	A	A	A
SGN-U579212_snp25451	G	G	G	G	G	G	G	G	G	G	G	G	G	G	G	G	G	G	G	G	G	G	G	G	G	G	G	G	G	G	G	G	G	G	G	G	G	G	G	G	G	G	G	G	G	G	G	G	G
SGN-U579212_snp25597	T	T	T	T	T	T	T	T	T	T	T	T	T	T	T	T	T	T	T	T	T	T	T	T	T	T	T	T	T	T	T	T	T	T	T	T	T	T	T	T	T	T	T	T	T	T	T	T	T
SGN-U582689_snp30543	T	T	T	T	T	T	T	T	T	T	T	T	T	T	T	T	T	T	T	T	T	T	T	T	T	T	T	T	T	T	T	T	T	T	T	T	T	T	T	T	T	T	T	T	T	T	T	T	T
solcap_snp_sl_61886	A	A	A	A	C	A	A	A	A	A	A	A	A	A	A	A	A	A	C	A	M	M	C	C	M	M	A	M	C	M	A	C	A	M	C	M	M	M	M	M	C	C	A	C	M	M	C	C	C
solcap_snp_sl_61881	A	A	A	A	C	A	A	A	A	A	A	A	A	A	A	A	A	A	C	A	M	M	C	C	M	M	A	M	C	M	A	C	A	M	C	M	M	M	M	M	C	C	A	C	M	M	C	C	C
solcap_snp_sl_61880	C	C	C	C	T	C	C	C	C	C	C	C	C	C	C	C	C	C	T	C	Y	Y	T	T	Y	Y	C	Y	T	Y	C	T	C	Y	T	Y	Y	Y	Y	Y	T	T	C	T	Y	Y	T	T	T
solcap_snp_sl_34141	G	G	G	G	G	G	G	G	G	G	G	G	G	G	G	G	G	G	G	G	G	G	G	G	G	G	G	G	G	G	G	G	G	G	G	G	G	G	G	G	G	G	G	G	G	G	G	G	G
solcap_snp_sl_61875	G	G	G	G	A	A	G	G	G	G	G	A	A	G	G	A	R	A	A	G	R	R	A	A	R	R	G	R	A	R	G	A	G	R	A	R	A	A	A	R	A	A	G	A	R	A	A	A	A
CL015521-0708	C	C	C	C	C	C	C	C	C	C	C	C	C	C	C	C	C	C	C	C	C	C	C	C	C	C	C	C	C	C	C	C	C	C	C	C	C	C	C	C	C	C	C	C	C	C	C	C	C
CL015521-0417	A	A	A	A	C	C	A	A	A	A	A	C	C	A	A	C	M	C	C	A	M	M	C	C	M	M	A	M	C	M	A	C	A	M	C	M	C	C	C	M	C	C	A	A	M	C	C	C	C
solcap_snp_sl_20835	A	A	A	A	A	A	A	A	A	A	A	A	A	A	A	A	A	A	A	A	A	A	G	A	R	A	A	A	A	A	A	R	A	A	A	R	A	A	A	A	A	A	A	A	A	A	A	R	A
solcap_snp_sl_61853	C	C	C	C	T	T	C	C	C	C	C	T	T	C	C	T	Y	T	T	C	Y	Y	T	T	Y	Y	C	Y	T	Y	C	T	C	Y	T	Y	T	T	T	Y	T	T	C	Y	Y	T	T	T	T
solcap_snp_sl_61847	C	C	C	C	T	T	C	C	C	C	C	T	T	C	C	T	Y	T	T	C	Y	Y	T	T	Y	Y	C	Y	T	Y	C	T	C	Y	T	Y	T	T	T	Y	T	T	C	Y	Y	T	T	T	T
solcap_snp_sl_20830	A	A	A	A	A	A	A	A	A	A	A	A	A	A	A	A	A	A	A	A	A	A	A	A	A	A	A	A	A	A	A	A	A	A	A	A	A	A	A	A	A	A	A	A	A	A	A	A	A
solcap_snp_sl_61820	C	C	C	C	C	C	C	C	C	C	C	C	C	C	C	C	C	C	C	C	C	C	C	C	C	C	C	C	C	C	C	C	C	C	C	C	C	C	C	C	C	C	C	C	C	C	C	C	C
SGN-U569555_snp276	A	A	A	A	A	A	A	A	A	A	A	A	A	A	A	A	A	A	A	A	A	A	A	A	A	A	A	A	A	A	A	A	A	A	A	A	A	A	A	A	A	A	A	A	A	A	A	A	A
solcap_snp_sl_9141	C	C	C	C	T	T	C	C	C	C	C	T	T	C	C	T	Y	T	C	C	C	C	T	T	Y	Y	C	C	C	C	C	Y	C	C	C	Y	C	C	Y	C	C	Y	C	Y	C	Y	C	Y	C
solcap_snp_sl_9140	C	C	C	C	T	T	C	C	C	C	C	T	T	C	C	T	Y	T	C	C	C	C	T	T	Y	Y	C	C	C	C	C	Y	C	C	C	Y	C	C	Y	C	C	Y	C	Y	C	Y	C	Y	C
solcap_snp_sl_9139	G	G	G	G	A	A	G	G	G	G	G	A	A	G	G	A	R	A	G	G	G	G	A	A	R	R	G	G	G	G	G	R	G	G	G	R	G	G	R	G	G	R	G	R	G	R	G	R	G
solcap_snp_sl_9138	A	A	A	A	G	G	A	A	A	A	A	G	G	A	A	G	R	G	A	A	A	A	G	G	R	R	A	A	A	A	A	R	A	A	A	R	A	A	R	A	A	R	A	R	A	R	A	R	A
solcap_snp_sl_9137	G	G	G	G	A	A	G	G	G	G	G	A	A	G	G	A	R	A	G	G	G	G	A	A	R	R	G	G	G	G	G	R	G	G	G	R	G	G	R	G	G	R	G	R	G	R	G	R	G
solcap_snp_sl_9136	C	C	C	C	G	G	C	C	C	C	C	G	G	C	C	G	S	G	C	C	C	C	G	G	S	S	C	C	C	C	C	S	C	C	C	S	C	C	S	C	C	S	C	S	C	S	C	S	C
solcap_snp_sl_9135	G	G	G	G	A	A	G	G	G	G	G	A	A	G	G	A	R	A	G	G	G	G	A	A	R	R	G	G	G	G	G	R	G	G	G	R	G	G	R	G	G	R	G	R	G	R	G	R	G
solcap_snp_sl_9134	A	A	A	A	G	G	A	A	A	A	A	G	G	A	A	G	R	G	A	A	A	A	G	G	R	R	A	A	A	A	A	R	A	A	A	R	A	A	R	A	A	R	A	R	A	R	A	R	A
solcap_snp_sl_9133	T	T	T	T	C	C	T	T	T	T	T	C	C	T	T	C	Y	C	T	T	T	T	C	C	Y	Y	T	T	T	T	T	Y	T	T	T	Y	T	T	Y	T	T	Y	T	Y	T	Y	T	Y	T
solcap_snp_sl_9132	A	A	A	A	G	G	A	A	A	A	A	G	G	A	A	G	R	G	A	A	A	A	G	G	R	R	A	A	A	A	A	R	A	A	A	R	A	A	R	A	A	R	A	R	A	R	A	R	A
solcap_snp_sl_9131	T	T	T	T	C	C	T	T	T	T	T	C	C	T	T	C	Y	C	T	T	T	T	C	C	Y	Y	T	T	T	T	T	Y	T	T	T	Y	T	T	Y	T	T	Y	T	Y	T	Y	T	Y	T
solcap_snp_sl_61803	T	T	T	T	A	A	T	T	T	T	T	A	A	T	T	A	W	A	T	T	T	T	A	A	W	W	T	T	T	T	T	W	T	T	T	W	T	T	W	T	T	W	T	W	T	W	T	W	T
solcap_snp_sl_9130	T	T	T	T	C	C	T	T	T	T	T	C	C	T	T	C	Y	C	T	T	T	T	C	C	Y	Y	T	T	T	T	T	Y	T	T	T	Y	T	T	failed	T	T	Y	T	Y	T	Y	T	Y	T
solcap_snp_sl_9129	A	A	A	A	G	G	A	A	A	A	A	G	G	A	A	G	R	G	A	A	A	A	G	G	R	R	A	A	A	A	A	R	A	A	A	R	A	A	failed	A	A	R	A	R	A	R	A	R	A
SL10494_706_CL009124-0515	G	G	G	G	A	A	G	G	G	G	G	A	A	G	G	A	R	A	G	G	G	G	A	A	R	R	G	G	G	G	G	R	G	G	G	R	G	G	R	G	G	R	G	R	G	R	G	R	G
CL009124-0423	A	A	A	A	A	A	A	A	A	A	A	A	A	A	A	A	A	A	A	A	A	A	A	A	A	A	A	A	A	A	A	A	A	A	A	A	A	A	A	A	A	A	A	A	A	A	A	A	A
solcap_snp_sl_9128	A	A	A	A	G	G	A	A	A	A	A	G	G	A	A	G	R	G	A	A	A	A	G	G	R	R	A	A	A	A	A	R	A	A	A	R	A	A	R	A	A	R	A	R	A	R	A	R	A
solcap_snp_sl_9127	G	G	G	G	A	A	G	G	G	G	G	A	A	G	G	A	R	A	G	G	G	G	A	A	R	R	G	G	G	G	G	R	G	G	G	R	G	G	R	G	G	R	G	R	G	R	G	R	G
solcap_snp_sl_9126	G	G	G	G	A	A	G	G	G	G	G	A	A	G	G	A	R	A	G	G	G	G	A	A	R	R	G	G	G	G	G	R	G	G	G	R	G	G	R	G	G	R	G	R	G	R	G	R	G
solcap_snp_sl_24909	C	C	C	C	A	A	C	C	C	C	C	A	A	C	C	A	M	A	C	C	C	C	A	A	M	M	C	C	C	C	C	M	C	C	C	M	C	C	M	C	C	M	C	M	C	M	C	M	C
solcap_snp_sl_9125	C	C	C	C	G	G	C	C	C	C	C	G	G	C	C	G	S	G	C	C	C	C	G	G	S	S	C	C	C	C	C	S	C	C	C	S	C	C	S	C	C	S	C	S	C	S	C	S	C
solcap_snp_sl_9124	failed	failed	failed	failed	failed	failed	failed	failed	failed	failed	failed	failed	failed	failed	failed	failed	failed	failed	failed	failed	failed	failed	failed	failed	failed	failed	failed	failed	failed	failed	failed	failed	failed	failed	failed	failed	failed	failed	failed	failed	failed	failed	failed	failed	failed	failed	failed	failed	failed
solcap_snp_sl_9123	A	A	A	A	G	G	A	A	A	A	A	G	G	A	A	G	R	G	A	A	A	A	G	G	R	R	A	A	A	A	A	R	A	A	A	R	A	A	R	A	A	R	A	R	A	R	A	R	A
solcap_snp_sl_9122	T	T	T	T	C	C	T	T	T	T	T	C	C	T	T	C	Y	C	T	T	T	T	C	C	Y	Y	T	T	T	T	T	Y	T	T	T	Y	T	T	Y	T	T	Y	T	Y	T	Y	T	Y	T
solcap_snp_sl_15173	T	T	T	T	A	A	T	T	T	T	T	A	A	T	T	A	W	A	T	T	T	T	A	A	W	W	T	T	T	T	T	W	T	T	T	W	T	T	W	T	T	W	T	W	T	W	T	W	T
solcap_snp_sl_9118	T	T	T	T	A	A	T	T	T	T	T	A	A	T	T	A	W	A	T	T	T	T	A	A	W	W	T	T	T	T	T	W	T	T	T	W	T	T	W	T	T	W	T	W	T	W	T	W	T
solcap_snp_sl_61800	T	T	T	T	G	G	T	T	T	T	T	G	G	T	T	G	K	G	T	T	T	T	G	G	K	K	T	T	T	T	T	K	T	T	T	K	T	T	K	T	T	K	T	K	T	K	T	K	T
solcap_snp_sl_9117	C	C	C	C	T	T	C	C	C	C	C	T	T	C	C	T	Y	T	C	C	C	C	Y	C	C	Y	C	C	C	C	C	Y	C	C	C	C	C	C	Y	C	C	Y	C	Y	C	Y	C	C	C
solcap_snp_sl_9116	C	C	C	C	G	G	C	C	C	C	C	G	G	C	C	G	S	G	C	C	C	C	G	G	S	S	C	C	C	C	C	S	C	C	C	S	C	C	S	C	C	S	C	S	C	S	C	S	C
solcap_snp_sl_9115	C	C	C	C	G	G	C	C	C	C	C	G	G	C	C	G	S	G	C	C	C	C	G	G	S	S	C	C	C	C	C	S	C	C	C	S	C	C	S	C	C	S	C	S	C	S	C	S	C
solcap_snp_sl_20809	G	G	G	G	G	C	G	G	G	G	G	C	C	G	G	C	S	C	G	G	G	G	S	C	S	G	G	G	G	G	G	G	G	G	G	S	G	G	S	G	G	G	G	S	G	S	G	S	G
solcap_snp_sl_20803	C	C	C	C	C	T	C	C	C	C	C	T	T	C	C	T	Y	T	C	C	C	C	Y	T	Y	C	C	C	C	C	C	C	C	C	C	Y	C	C	Y	C	C	C	C	Y	C	Y	C	Y	C
solcap_snp_sl_20802	T	T	T	T	T	G	T	T	T	T	T	G	G	T	T	G	K	G	T	T	T	T	failed	G	K	T	T	T	T	T	T	T	T	T	T	K	T	T	K	T	T	T	T	K	T	K	T	K	T
solcap_snp_sl_20801	G	G	R	R	G	failed	G	G	G	G	G	A	A	G	G	failed	R	A	G	G	G	G	R	A	R	G	G	G	G	G	G	G	G	G	G	R	G	G	R	failed	R	G	G	R	G	R	G	R	G
solcap_snp_sl_20800	G	G	G	G	G	A	G	G	G	G	G	A	A	G	G	A	R	A	G	G	G	G	R	A	R	G	G	G	G	G	G	G	G	G	G	R	G	G	R	G	G	G	G	R	G	R	G	R	G
solcap_snp_sl_34126	G	G	G	G	G	A	G	G	G	G	G	A	A	G	G	A	R	A	G	G	G	G	R	A	R	G	G	G	G	G	G	G	G	G	G	R	G	G	R	G	G	G	G	R	G	R	G	R	G
solcap_snp_sl_61794	G	G	G	G	G	G	G	G	G	G	G	G	G	G	G	G	G	G	G	G	G	G	G	G	G	G	G	G	G	G	G	G	G	G	G	G	G	G	G	G	G	G	G	G	G	G	G	G	G
solcap_snp_sl_34125	A	A	A	A	A	G	A	A	A	A	A	G	G	A	A	G	R	G	A	A	A	A	R	G	R	A	A	A	A	A	A	A	A	A	A	R	A	A	R	A	A	A	A	R	A	R	A	R	A
solcap_snp_sl_34124	G	G	G	G	G	A	G	G	G	G	G	A	A	G	G	A	R	A	G	G	G	G	R	A	R	G	G	G	G	G	G	G	G	G	G	R	G	G	R	G	G	G	G	R	G	R	G	R	G
solcap_snp_sl_20794	G	G	G	G	G	A	G	G	G	G	G	G	A	G	G	G	R	A	G	G	G	G	R	A	R	G	G	G	G	G	G	G	G	G	G	R	G	G	R	G	G	G	G	R	G	R	G	R	G
solcap_snp_sl_20779	T	T	T	T	T	C	T	T	T	T	T	T	C	T	T	T	Y	C	T	T	T	T	Y	C	Y	T	T	T	T	T	T	T	T	T	T	Y	T	T	Y	T	T	T	T	Y	T	Y	T	Y	T
solcap_snp_sl_20777	G	G	G	G	G	T	G	G	G	G	G	G	T	G	G	G	K	T	G	G	G	G	G	T	G	G	G	G	G	G	G	G	G	G	G	G	G	G	K	G	G	G	G	K	G	K	G	G	G
solcap_snp_sl_20776	A	A	A	A	A	G	A	A	A	A	A	A	G	A	A	A	R	G	A	A	A	A	A	G	A	A	A	A	A	A	A	A	A	A	A	A	A	A	R	A	A	A	A	R	A	R	A	A	A
solcap_snp_sl_20775	G	G	G	G	G	A	G	G	G	G	G	G	A	G	G	G	R	A	G	G	G	G	G	A	G	G	G	G	G	G	G	G	G	G	G	G	G	G	R	G	G	G	G	R	G	R	G	G	G
solcap_snp_sl_20773	A	A	A	A	A	T	A	A	A	A	A	A	T	A	A	A	W	T	A	A	A	A	A	T	A	A	A	A	A	A	A	A	A	A	A	A	A	A	W	A	A	A	A	W	A	W	A	A	A
solcap_snp_sl_20772	T	T	T	T	T	C	T	T	T	T	T	T	C	T	T	T	Y	C	T	T	T	T	T	C	T	T	T	T	T	T	T	T	T	T	T	T	T	T	Y	T	T	T	T	Y	T	Y	T	T	T
solcap_snp_sl_20771	G	G	G	G	G	A	G	G	G	G	G	G	A	G	G	G	R	A	G	G	G	G	G	A	G	G	G	G	G	G	G	G	G	G	G	G	G	G	R	G	G	G	G	R	G	R	G	G	G
solcap_snp_sl_20770	C	C	C	C	C	G	C	C	C	C	C	C	G	C	C	C	S	G	C	C	C	C	C	G	C	C	C	C	C	C	C	C	C	C	C	C	C	C	S	C	C	C	C	S	C	S	C	C	C
CL009269-0219	T	T	T	T	T	C	T	T	T	T	T	T	C	T	T	T	Y	C	T	T	T	T	T	C	T	T	T	T	T	T	T	T	T	T	T	T	T	T	Y	T	T	T	T	Y	T	Y	T	T	T
CL009269-0272	A	A	A	A	A	A	A	A	A	A	A	A	A	A	A	A	A	A	A	A	A	A	A	A	A	A	A	A	A	A	A	A	A	A	A	A	A	A	A	A	A	A	A	A	A	A	A	A	A
solcap_snp_sl_20769	T	T	T	T	T	A	T	T	T	T	T	T	A	T	T	T	W	A	T	T	T	T	T	A	T	T	T	T	T	T	T	T	T	T	T	T	T	T	W	T	T	T	T	W	T	W	T	T	T
solcap_snp_sl_20765	A	A	A	A	A	G	A	A	A	A	A	A	G	A	A	A	R	G	A	A	A	A	A	G	A	A	A	A	A	A	A	A	A	A	A	A	A	A	R	A	A	A	A	R	A	R	A	A	A
solcap_snp_sl_20764	C	C	C	C	C	T	C	C	C	C	C	C	T	C	C	C	Y	T	C	C	C	C	C	T	C	C	C	C	C	C	C	C	C	C	C	C	C	C	Y	C	C	C	C	Y	C	Y	C	C	C
solcap_snp_sl_20763	T	T	T	T	T	C	T	T	T	T	T	T	C	T	T	T	Y	C	T	T	T	T	T	C	T	T	T	T	T	T	T	T	T	T	T	T	T	T	Y	T	T	T	T	Y	T	Y	T	T	T
solcap_snp_sl_20762	A	A	A	A	A	G	A	A	A	A	A	A	G	A	A	A	R	G	A	A	A	A	A	G	A	A	A	A	A	A	A	A	A	A	A	A	A	A	R	A	A	A	A	R	A	R	A	A	A
solcap_snp_sl_34121	T	T	T	T	T	C	T	T	T	T	T	T	C	T	T	T	Y	C	T	T	T	T	T	C	T	T	T	T	T	T	T	T	T	T	T	T	T	T	Y	T	T	T	T	Y	T	Y	T	T	T
solcap_snp_sl_20760	T	T	T	T	T	G	T	T	T	T	T	T	G	T	T	T	K	G	T	T	T	T	T	G	T	T	T	T	T	T	T	T	T	T	T	T	T	T	K	T	T	T	T	K	T	K	T	T	T
solcap_snp_sl_20759	A	A	A	A	A	G	A	A	A	A	A	A	G	A	A	A	R	G	A	A	A	A	A	G	A	A	A	A	A	A	A	A	A	A	A	A	A	A	R	A	A	A	A	R	A	R	A	A	A
solcap_snp_sl_20757	A	A	A	A	A	G	A	A	A	A	A	A	G	A	A	A	R	G	A	A	A	A	A	G	A	A	A	A	A	A	A	A	A	A	A	A	A	A	R	A	A	A	A	R	A	R	A	A	A
solcap_snp_sl_20752	T	T	T	T	T	A	T	T	T	T	T	T	A	T	T	T	W	A	T	T	T	T	T	A	T	T	T	T	T	T	T	T	T	T	T	T	T	T	W	T	T	T	T	W	T	W	T	T	T
solcap_snp_sl_20751	T	T	T	T	T	C	T	T	T	T	T	T	C	T	T	T	Y	C	T	T	T	T	T	C	T	T	T	T	T	T	T	T	T	T	T	T	T	T	Y	T	T	T	T	Y	T	Y	T	T	T
solcap_snp_sl_20748	T	T	T	T	T	C	T	T	T	T	T	T	C	T	T	T	Y	C	T	T	T	T	T	C	T	T	T	T	T	T	T	T	T	T	T	T	T	T	Y	T	T	T	T	Y	T	Y	T	T	T
solcap_snp_sl_20745	A	A	A	A	A	R	A	A	A	A	A	A	R	A	A	A	R	R	A	A	A	A	A	R	A	A	A	A	A	A	A	A	A	A	A	A	A	A	R	A	A	A	A	R	A	R	A	A	A
solcap_snp_sl_20743	C	C	C	C	C	T	C	C	C	C	C	C	T	C	C	C	Y	T	C	C	C	C	C	T	C	C	C	C	C	C	C	C	C	C	C	C	C	C	Y	C	C	C	C	Y	C	Y	C	C	C
solcap_snp_sl_20737	C	C	C	C	C	T	C	C	C	C	C	C	T	C	C	C	Y	T	C	C	C	C	C	T	C	C	C	C	C	C	C	C	C	C	C	C	C	C	Y	C	C	C	C	Y	C	Y	C	C	C
solcap_snp_sl_20736	C	C	C	C	C	A	C	C	C	C	C	C	A	C	C	C	M	A	C	C	C	C	C	A	C	C	C	C	C	C	C	C	C	C	C	C	C	C	M	C	C	C	C	M	C	M	C	C	C
solcap_snp_sl_20731	A	A	A	A	A	G	A	A	A	A	A	A	G	A	A	A	R	G	A	A	A	A	A	G	A	A	A	A	A	A	A	A	A	A	A	A	A	A	R	A	A	A	A	R	A	R	A	A	A
solcap_snp_sl_20730	C	C	C	C	C	T	C	C	C	C	C	C	T	C	C	C	Y	T	C	C	C	C	C	T	C	C	C	C	C	C	C	C	C	C	C	C	C	C	Y	C	C	C	C	Y	C	Y	C	C	C
solcap_snp_sl_34116	T	T	T	T	T	C	T	T	T	T	T	T	C	T	T	T	Y	C	T	T	T	T	T	C	T	T	T	T	T	T	T	T	T	T	T	T	T	T	Y	T	T	T	T	Y	T	Y	T	T	T
solcap_snp_sl_34115	G	G	G	G	G	C	G	G	G	G	G	G	G	G	G	G	G	C	G	G	G	G	G	C	G	G	G	G	G	G	G	G	G	G	G	G	G	G	S	G	G	G	G	S	G	S	G	G	G
solcap_snp_sl_61769	C	C	C	C	C	C	C	C	C	C	C	C	C	C	C	C	C	C	C	C	C	C	C	C	C	C	C	C	C	C	C	C	C	C	C	C	C	C	C	C	C	C	C	C	C	C	C	C	C
solcap_snp_sl_34114	T	T	T	T	T	C	T	T	T	T	T	T	T	T	T	T	T	C	T	T	T	T	T	C	T	T	T	T	T	T	T	T	T	T	T	T	T	T	Y	T	T	T	T	Y	T	Y	T	T	T
solcap_snp_sl_20724	C	C	C	C	C	T	C	C	C	C	C	C	C	C	C	C	C	T	C	C	C	C	C	T	C	C	C	C	C	C	C	C	C	C	C	C	C	C	Y	C	C	C	C	Y	C	Y	C	C	C
solcap_snp_sl_20723	G	G	G	G	G	C	G	G	G	G	G	G	G	G	G	G	G	C	G	G	G	G	G	C	G	G	G	G	G	G	G	G	G	G	G	G	G	G	S	G	G	G	G	S	G	S	G	G	G
solcap_snp_sl_20721	T	T	T	T	T	C	T	T	T	T	T	T	T	T	T	T	T	C	T	T	T	T	T	C	T	T	T	T	T	T	T	T	T	T	T	T	T	T	Y	T	T	T	T	Y	T	Y	T	T	T
solcap_snp_sl_20720	A	A	A	A	A	G	A	A	A	A	A	A	A	A	A	A	A	G	A	A	A	A	A	G	A	A	A	A	A	A	A	A	A	A	A	A	A	A	R	A	A	A	A	R	A	R	A	A	A
solcap_snp_sl_20719	A	A	A	A	A	T	A	A	A	A	A	A	A	A	A	A	A	T	A	A	A	A	A	T	A	A	A	A	A	A	A	A	A	A	A	A	A	A	W	A	A	A	A	W	A	W	A	A	A
solcap_snp_sl_20718	T	T	T	T	T	C	T	T	T	T	T	T	T	T	T	T	T	C	T	T	T	T	T	C	T	T	T	T	T	T	T	T	T	T	T	T	T	T	Y	T	T	T	T	Y	T	Y	T	T	T
solcap_snp_sl_20714	C	C	C	C	C	T	C	C	C	C	C	C	C	C	C	C	C	T	C	C	C	C	C	T	C	C	C	C	C	C	C	C	C	C	C	C	C	Y	Y	C	Y	C	C	Y	C	Y	C	C	C
solcap_snp_sl_20710	A	A	A	A	A	G	A	A	A	A	A	A	A	A	A	A	A	G	A	A	A	A	A	G	A	A	A	A	A	A	A	A	A	A	A	A	A	R	R	A	R	A	A	R	A	R	A	A	A
solcap_snp_sl_20703	A	A	A	A	A	C	A	A	A	A	A	A	A	A	A	A	A	C	A	A	A	A	A	C	A	A	A	A	A	A	A	A	A	A	A	A	A	M	M	A	M	A	A	M	A	M	A	A	A
solcap_snp_sl_20702	C	C	C	C	C	A	C	C	C	C	C	C	C	C	C	C	C	A	C	C	C	C	C	A	C	C	C	C	C	C	C	C	C	C	C	C	C	M	M	C	M	C	C	M	C	M	C	C	C
solcap_snp_sl_20699	G	G	G	G	G	A	G	G	G	G	G	G	G	G	G	G	G	A	G	G	G	G	G	A	G	G	G	G	G	G	G	G	G	G	G	G	G	R	R	G	R	G	G	R	G	R	G	G	G
solcap_snp_sl_61762	A	A	A	A	A	C	A	A	A	A	A	A	A	A	A	A	A	C	A	A	A	A	A	C	A	A	A	A	A	A	A	A	A	A	A	A	A	M	M	A	M	A	A	M	A	M	A	A	A
solcap_snp_sl_34106	C	C	C	C	C	T	C	C	C	C	C	C	C	C	C	C	C	T	C	C	C	C	C	C	C	C	C	C	C	C	C	C	C	C	C	C	C	Y	Y	C	Y	C	C	Y	C	Y	C	C	C
CL015122-0237	G	G	G	G	G	G	G	G	G	G	G	G	G	G	G	G	G	G	G	G	G	G	G	G	G	G	G	G	G	G	G	G	G	G	G	G	G	G	G	G	G	G	G	G	G	G	G	G	G
solcap_snp_sl_20690	C	C	C	C	C	C	C	C	C	C	C	C	C	C	C	C	C	C	C	C	C	C	C	C	C	C	C	C	C	C	C	C	C	C	C	C	C	C	C	C	C	C	C	C	C	C	C	C	C
CL015880-0286	A	A	A	A	A	A	A	A	A	A	A	A	A	A	A	A	A	A	A	A	A	A	A	A	A	A	A	A	A	A	A	A	A	A	A	A	A	A	A	A	A	A	A	A	A	A	A	A	A
solcap_snp_sl_34105	T	T	T	T	T	T	T	T	T	T	T	T	T	T	T	T	T	T	T	T	T	T	T	T	T	T	T	T	T	T	T	T	T	T	T	T	T	T	T	T	T	T	T	T	T	T	T	T	T
solcap_snp_sl_61721	T	T	T	T	T	T	T	T	T	T	T	T	T	T	T	T	T	T	T	T	T	T	T	T	T	T	T	T	T	T	T	T	T	T	T	T	T	T	T	T	T	T	T	T	T	T	T	T	T
[truncated: 5,723 more rows]
[truncated: 41 more columns]
