# Supplementary material for: Breeding Has Increased the Diversity of Cultivated Tomato in The Netherlands
Source: Front Plant Sci. 2019 Dec 20;10:1606. doi: 10.3389/fpls.2019.01606 (PMC6932954; doi:10.3389/fpls.2019.01606)
Supplement: Data Sheet S4 — Disease resistances of the 90 varieties according the official tomato variety registration of NAKTuinbouw. [file DataSheet_4.xlsx]

## Sheet: Sheet1
						ToMV				Cladosporium fulvum					Verticillium alboatrum fysio 0	Verticillium dahliae		Fusarium oxysporum f.sp. Lycopersici			Fusarium oxysporum f.sp. radicis-lycopersici	Meloidogyne incognita	Phytophthora infestans	Pseudomonas tomato	Oidium lycopersicum	TYLCV	TSWV	Tomato torrado virus
						stam				fysio								fysio
Cultivar name	Year	Company	info source	fruitsize	TMVr resistance?	0	1	2	1.2	A	B	C	D	E			0	0	1	2
Extase	1950			4	0	1	1	1		9	9				1			1	1			1
Premier	1950	?			0
Renova	1950	?			0
Robar	1950	?			0
Pygmee	1956	?			0
Nunhem´s Tuckqueen	1957				0
Allround	1960	?			0
No.59	1960	?			0
Superieur	1961	?			0
Roda	1962	?			0
6289 Rode	1963	?			0
Osiris	1964	?			0
Titan	1964	?			0
Rovic	1965	?			0
Moneydor	1966	?		5	1	1	1	1	1	1	1	1	1	1			1	1
Moneymar	1966	?			0
Bleke Raak	1968	?			0
V 121	1970	?			0
Roda Compacta	1971	?			0
Moneymaker	1972	?		5	0	1	1	1	1	1	1	1	1	1			1	1
Sonatine	1974	de Ruiter			1	9	9	9		9	9	9	9	9					9	9									resistant to ToMV. No further details given
Sonato	1974	de Ruiter			1	9	9	9		9	9	1	1	1					9										resistant to ToMV. No further details given
Mecano VF	1975	Royal Sluis			0											9			9										resistant to Verticillium. No species name given.
Ventura FR	1975			5	1	9	9	9		9	9	9	9	9	9				9	9		9
Diego	1978	Pannevis		7	1	9	9	9		9	9	9	9	9	9				9
Coronation	1979	de Mos		7	1	9	9	9		9	9	9	9	9					9	9		9
Dombito	1979	Bruinsma			1	9	9	9		1	9	1	9	1					9	9
Shirly	1979	Enza			1	9	9	9		9	9	9	9	9					9	9
Splendid	1979	de Mos			1	9	9	9		9	9	1	1	1					9	1
Abunda	1981	Rijk Zwaan		5	1	9	9	9		9	9	9	9	9	9				9	9
Amfora	1981	Enza		5	0	1	1	1	1	1	1	1	1	1	9			9	9			9
Flaneur	1981	Leen de Mos		5	1	9	9	9		9	9	9	9	1					9	9
Robin	1981	Royal Sluis		6	1	9	9	9	9						9			9	9		9
Novita	1982	Rijk Zwaan			1	9	9	9		9	9	9	9	9					9	9		9
Sierra	1982	de Mos			1	9	9	9		9	9	9	1	1					9	1
Bornia	1983	Royal Sluis			1	9	9	9		9	9	9	1	1	9				9	1		9
Darus	1983	Sluis en Groot		3	1	9	9	9	9	1	1	1	1	1			9
Camona	1985	?
Matador	1987	Bruinsma		7	1	9	9	9		9	9	9	9	9	9				9	9	9
Ramy	1987	Sluis en Groot			1	9	9	9		1	1	1	1	1	9				9	9		9
Start	1987	Enza			1	9	9	9		9	9	9	9	9	9				9	1
Isola	1988	Nunhem		4	0	1	1	1		1	1	1	1	1	9				9					9
Multiset	1988	Royal Sluis		4	1	9	9	9		9	9	9	9	9	9				9	9		9
Cherry Wonder	1989	Bruinsma		1	1	9	9	9		9	9	9	9	9					9	9
Majorca	1991	Sluis en Groot		5	1	9	9	9		9	9	9	1	1		9			9	9		9
Recento	1991			7	1	9	9	9		9	9	9	9	9	9				9	9	9
Tomosa	1991	de Mos		5	1	9	9	9		9	9	9	9	9	9				9	9		9
Enchantment	1992	?
Optima	1992	Royal Sluis		7	1	9	9	9		1	1	1	1	1	9				9	9		9
Sirocco	1992	Enza		4	1	9	9	9		9	9	9	9	9	9				9	9
Trajan	1992			5	0	1	1	1		1	1	1	1	1	9				9			9
Dario	1993	Sluis en Groot		5	0	1	1	1	1								9	9	9			9		9
Favorita	1993	de Ruiter		1	1	9	9	9		9	9	9	9	9				9	9			9
Jamaica	1993	Rijk Zwaan		6	1	9	9	9		9	9	9	9	9	9			9	9		9
Apollo	1994	Bruinsma		6	1	9	9	9		9	9	9	9	9		9			9	9		1
Cherokee	1995	Enza		2	1	9	9	9		1	1	1	1	1				9	9
Aromata	1996	Rijk Zwaan		5	1	9	9	9	9	9	9	9	9	9	9			9	9		9
Belle	1999	Enza		8	1	9	9	9	9								9	9	9			1
Starfighter	1999	Bruinsma		5	1	9	9	9	9	9	9	9	9	9			9	9	9		9
Sunstream	2001	Enza		2	1	9	9	9	9	1	1	1	1	1			9	9	9			1
Bolzano	2002	de Ruiter		5	1	9	9	9	9	9	9	9	9	9			9	9	9		9	1
Olmeca	2004	Syngenta		5	1	9	9	9	9	1	1	1	1	1			9	9	9		9	9
Amoroso (72-116 RZ)	2005	Rijk Zwaan		2	1	9	9	9	9	9	9	9	9	9			9	9	9		9	9			9
Arawak	2005	Syngenta	web		1	9	9	9								9		1	1			1
Lorenzo	2005	De Ruiter		5	1	9	9	9		1	1	1	1	1			9	9	9		9	1
Mini Star	2005	Sakata	web	2	1	9	9	9		9	9	9	9	9			1	9	1			1
Elanto (72-372 RZ)	2007	Rijk Zwaan		6	1	9	9	9	9	9	9	9	9	9	9			9	9		9	1			9
Juanita	2007	de Ruiter		2	1	9	9	9		1	1	1	1	1			1	9	9			9
Philovita	2007	De Ruiter		2	1	9	9	9	9	9	9	9	9	9			1	9	9		9	1	9
Roterno (72-230 RZ)	2007	Rijk Zwaan		5	1	9	9	9	9	9	9	9	9	9			9	9	9		9	9			9		9
Santorange	2007	Ruiter	web	2	1	9	9	9		1	1	1	1	1			9	9	9			1
Tomimaru Muchoo	2007	Ruiter	web		1	9	9	9									1	9	9			9
Arvento (72-375 RZ)	2008	?		5	1	9	9	9	9	9	9	9	9	9		9		9	9		9	1			9		9
Starbuck	2008	Ruiter	web	9	0	1	1	1		9	9	9	9	9			1	9	9			1
Angelle	2009	Syngenta	web*	2	1	9	9	9	9	1	1	1	1	1		0		1	1		1	2			1
Tourance	2010	Ruiter	web	5	1	9	9	9		9	9	9	9	9				9	9			1
DRK 936	2011	?		4	1	9	9	9		9	9	9	9	9			9	9	9		9	1			9
Komeett	2011	Seminis		6	1	9	9	9		9	9	9	9	9			9	9	9		9	1
Sassari (72-138 RZ)	2011	Rijk Zwaan	web	2	1	9	9	9	9	9	9	9	9	9			9	9	9		9	3							resistant to Mi
Sweetelle	2011	Syngenta	web	2	1	9	9	9	9	9	9	9	9	9			1	9	1		1	3
Bambelo,oranje	2013	Syngenta		3	0	1				1	1	1	1	1		1		9	1			3							Mi resistent
Diamantino	2013	Enza		6	1	9	9	9	9	1	1	1	1	1			9	9	9	9	9	1			9
Merlice	2013	Monsanto	web	6	1	9	9	9		9	9	9	9	9			9	9	9		9	2			9
Climstar	2014	Syngenta		6	1	9	9	9	9	9	9	9	9	9			9	9	9		9	1			9
Prolyco 2	2014	Monsanto		5	1	9	9	9		1	1	1	1	1			9	9	9			3		9					resistant to Mi
Romanella	2014	Syngenta	web	6	1	9	9	9	9	9	9	9	9	9			9	9	9		1	2		1	1	1	1
Wasino (72-155 RZ)	2014	Rijk Zwaan	web	3	1	9	9	9	9	9	9	9	9	9			9	9	9	1	9	3			9	1	1
DR7024TS	2015	Monsanto		9	1	9	9	9		9	9	9	9	9			9	9	1	1	9	1				1	1	9
Vacetto (72-164 RZ)	2015	Rijk Zwaan	web	2	1	9	9	9		1	1	1	1	1			1	9	1	1		1			1	1	1
SV0948TS	2016	Monsanto	web	2	1	9	9	9		9	9	9	9	9			9	9	9		1	2				9	1	9
		*	https://www.naktuinbouw.nl/groente/rasbeschrijving/tomaat-solanum-lycopersicum-l
