# Supplementary material for: Breeding Has Increased the Diversity of Cultivated Tomato in The Netherlands
Source: Front Plant Sci. 2019 Dec 20;10:1606. doi: 10.3389/fpls.2019.01606 (PMC6932954; doi:10.3389/fpls.2019.01606)
Supplement: Data Sheet S5 — GC-MS data of 66 annotated volatile compounds. Quantitative values of volatiles presented as counts (AU - arbitrary units) of corresponding selective ions. [file DataSheet_5.xlsx]

## Sheet: VOCs
GC-MS data of 66 annotated volatile compounds. Quantitative values of volaltiles presented as counts (AU - arbitrary units) of corresponding selective ions
Quantitative values of volatiles presented as counts (AU - arbitrary units) of corresponding selective ions
Column A: Compound's retention time
Column B: Compounds Experimental Retention Index (RIexp)
Column C: Compunds Library Retention Index (RIlib)
Column D: Retention index deviation (dRI=RIexp - RIlib)
Column E: Match of experimental mass spectra of a compound to NIST library mass spectra (MF: 1 to 1000)
Column F: compound's annotation
Column G: Compound's biochemical class
Column H: Compound's identification level: standard - compared to authentic chemicals; MS/RI - based on MF and dRI
Column I: Compound's elemental formula
Column J: Compounds universal CAS identifier
										Variety	Extase	Robar	Renova	Premier	Pygmee	Nunhem´s Tuckqueen	No.59	Allround	Superieur	Roda	6289 Rode	Osiris	Titan	Rovic	Moneydor	Moneymar	Bleke Raak	V 121	Roda Compacta	Moneymaker	Sonatine	Sonato	Mecano VF	Ventura FR	Diego	Dombito	Shirley	Splendid	Coronation	Abunda	Flaneur	Robin svfs 1	Robin svfs 2	Amfora	Novita	Sierra	Bornia	Darus	Camona
Retention time, min	RIexp	RIib	dRI	MF	Volatile annotation	Biochemical class	Identification	elemental formula	CAS#	Year	1950	1950	1950	1950	1956	1957	1960	1960	1961	1962	1963	1964	1964	1965	1966	1966	1968	1970	1971	1972	1974	1974	1975	1975	1978	1979	1979	1979	1979	1981	1981	1981	1981	1981	1982	1982	1983	1983	1985
21.6799	1037			882	(E)-4-Oxo-2-hexenal	Lipid-derived	MS	C6H8O2	2492435		81236	87063	111290	130166	97767	86132	43185	33337	183467	108388	51370	98235	44448	47141	53654	66066	80446	77083	60204	99778	60869	78095	102585	104745	73302	65521	89217	95016	94355	50874	100635	49513	114087	102658	102390	75059	115837	47962	60943
35.1931	1442	1454	-12	880	Geranylacetone	Carotenoid-derived	standard	C13H22O	3796701		125641	140581	214148	170403	74017	90484	165226	235779	138909	76145	383054	139830	102803	173584	246105	235927	170114	198339	65487	186152	62217	38268	203839	375592	136252	73213	70624	169187	184453	146245	35225	58350	170036	73243	217684	162362	161418	108728	80022
19.343	977	984	-7	730	1-octen-3-one	Lipid-derived	MS/RI	C8H14O	4312996		18702	11268	22031	18088	16323	13398	13637	15556	24424	19312	19287	14946	14354	15070	22191	17009	16671	12916	15956	18523	15723	12995	21043	26156	17338	13422	11896	20043	14204	14615	13165	21463	19609	18896	26508	15329	22069	19137	18160
11.0758	763	766	-3	866	1-Pentanol	Lipid-derived	standard	C5H12O	71410		26139	26767	32587	27513	24131	19296	27020	35955	40994	24329	34623	27749	26836	29205	35666	38290	32918	24663	27646	26192	25330	25272	20829	26687	29042	20113	25076	39500	25785	34307	22239	47431	26814	27219	38531	29464	35967	22105	24557
8.16071	717	683	34	860	1-Penten-3-ol	Lipid-derived	MS/RI	C5H10O	616251		22704	17377	18164	15768	25719	22438	18926	17909	37966	21578	15450	23695	22943	14936	18644	23211	17458	11232	26343	16390	19838	20617	13472	17449	17091	13186	25878	20590	10890	24274	24491	18451	24444	26301	22723	17068	25585	16734	14656
8.2079	678	680	-2	875	1-penten-3-one	Lipid-derived	standard	C5H8O	1629589		31022	31740	25871	32770	41822	38622	32352	23699	65634	27924	22922	39888	29419	26062	30760	39204	24010	18558	52940	27133	46412	39679	25520	27985	31696	20736	39266	29573	18223	35411	42900	44328		46652	32358	28842	41857	26466	28824
31.2394	1305	1315	-10	796	E,E-2,4-Decadienal	Lipid-derived	MS/RI	C10H16O	25152845		12039	10120	7170	11450	10444	12374	21278	25584	22330	4814	16792	13181	28054	11557	20037	25810	8442	14143	15252	7814	12280	14986	10478	12125	12130	8790	7891	16667	11559	24826	10280	20672	11611	11644	16203	20260	15127	21162	15144
20.6708	1012	1009	3	909	E,E-2,4-Heptadienal	Lipid-derived	MS/RI	C7H10O	4313035		24371	19735	18824	24062	34565	27636	23426	20964	48264	19006	18814	29241	28288	18823	25156	29032	20455	17089	39447	15956	31026	27643	23635	28902	22735	16686	25277	17541	14246	32310	27374	25635	28843	31847	21513	21757	30085	24846	21282
16.7407	914	911	3	940	E,E-2,4-Hexadienal	Lipid-derived	standard	C6H8O	142836		30009	30697	33482	38324	32322	31508	23966	19325	46749	37503	18956	33268	19375	24332	19396	31708	28348	22801	28352	34425	32412	27584	33420	43497	34292	24901	31386	33491	27581	26358	32566	19727	34883	39825	38021	31160	32459	27599	24707
29.416	1251	1261	-10	735	E-2-Decenal	Lipid-derived	MS/RI	C10H18O	3913813		671	9761	11842	15305	13759	19361	19409	20987	10836	13145	23771	14700	22195	22303	21182	19846	11571	17564	16729	13867	18223	16848	20793	14587	12773	17417	11938	633	12398	17899	15842	16652	19734	12615	16101	15173	680	23200	21002
21.2255	1027	1028	-1	927	2-Ethyl-1-hexanol	Lipid-derived	MS/RI	C8H18O	104767		150767	236422	181696	145081	136345	153311	402813	338294	81625	138301	197461	131148	165588	338205	127705	275624	260795	95874	344927	246459	275167	111954	176121	337793	233227	130418	158911	245677	174110	328881	167682	129980	150182	143484	241200	335258	179298	215249	147315
25.4919	1139	1154	-15	879	2-Ethylhexyl acetate	Ester	MS/RI	C10H20O2	103093		60321	37187	44503	53422	46080	68404	78984	60852	33505	47611	75444	58146	72223	67922	65693	50896	43935	42272	58954	49529	57059	55054	60398	57774	35700	50920	51826	45165	51342	58624	56265	50566	68310	53804	44458	53756	44476	92096	58319
18.6291	959	969	-10	782	E-2-Heptenal	Lipid-derived	standard	C7H12O	18829555		390232	323185	552469	500975	377259	329059	167486	125667	804553	625652	205511	376775	162132	216626	186598	289352	391168	292607	269571	587768	279466	288062	387009	467943	296255	265968	398454	398399	422417	178498	351655	232324	348871	506067	448519	293073	509628	214636	214636
14.4924	860	850	10	943	E-2-Hexenal	Lipid-derived	standard	C6H10O	6728263		588949	486608	509518	458649	772063	849946	800051	796897	964974	651304	565190	639851	786342	661659	647331	853736	687273	360486	776784	391103	828849	476403	500595	825222	569727	325778	540526	664656	274275	914945	659765	618153	815907	740424	658087	632727	560578	892378	403719
10.0254	738	739	-1	812	2-Methylbutanol	BCAA-derived	standard	C5H12O	137326		202912	142177	263417	20410	13478	68728	271448	77281	66826	332408	230357	100354	133541	257687	118720	99993	260562	88205	113307	82742	163022	144192	130803	172145	68882	80240	294893	42713	80288	65608	101522	75420	92722	105691	55902	62264	172492	116432	128337
19.8211	990	990	0	645	2-Octanone	Lipid-derived	MS/RI	C8H16O	111137		36700	21466	29393	38913	31066	35876	35855	38712	19945	25797	47259	38237	46247	35778	41438	33048	23343	31152	33668	21837	33227	29761	48887	22440	24317	36690	27330	26307	26131	34416	33960	46912	38941	28357	25095	26979	31075	47856	40648
22.388	1059	1058	1	824	E-2-Octenal	Lipid-derived	MS/RI	C8H14O	2548870		35745	22609	29706	36885	31409	29979	29693	31714	37899	26033	41320	31203	37030	27565	41197	32465	24844	31335	27819	25015	25178	30079	34319	27112	25760	31211	25565	33546	34817	29797	28715	43445	33001	33939	33529	29807	37869	41506	41267
10.7158	755	754	1	885	E-2-Pentenal	Lipid-derived	MS/RI	C5H8O	1576870		13604	12296	13820	12819	17338	16556	13242	10320	25395	14507	12626	15870	11754	11758	13353	14499	11767	6916	19267	14421	17436	15504	11633	16065	11887	7364	16285	13622	7819	13666	16618	14514	18071	19854	13514	11281	17761	14108	10020
19.9627	994	991	3	839	2-Pentylfuran	Furan	MS/RI	C9H14O	3777693		17308	10006	10273	10873	9204	12214	19070	28639	11953	8830	31426	11904	13698	21769	17652	30900	12451	11909	8536	11657	12368	6053	9564	26969	11495	6363	8003	24602	9590	18321	8189	17615	16802	9993	22050	17050	11915	15167	7876
24.6894	1117	1112	5	928	2-Phenylethanol	Phenolic	standard	C8H10O	60128		42469	54849	47031	22214	10589	44725	25629	16359	1326930	90051	45965	33069	298714	37727	26133	21982	62702	35341	48755	42317	49551	49271	123378	82240	78518	52947	64862	37841	64249	49662	59200	500084	32593	107881	77277	99346	299669	87420	82013
31.0388	1302	1301	1	921	2-Phenylnitroethane	Phenolic	MS/RI	C8H9NO2	6125242		11345	23966	34633	12339	3343	7169	13323	11776	242134	16946	35012	10520	119412	15725	14467	13944	21793	29200	8894	7062	11054	5234	15003	9757	72515	34655	9517	18460	37553	52246	12193	310649	4772	23481	29444	72913	120520	9271	28332
12.3386	796	801	-5	761	Z-3-Hexenal	Lipid-derived	standard	C6H10O	6789806		153406	122223	181712	171110	170040	151929	118655	100782	229787	184688	133415	164358	121899	116058	105339	151157	122874	104739	138669	194959	132915	146956	177263	174255	125447	124695	154714	151117	127721	110204	165097	102744	160352	160686	132412	114320	162853	131372	114788
9.88382	729	725	4	850	3-Methylbutanol	BCAA-derived	standard	C5H12O	123513		158901	155582	67758	6966	9675	171678	74380	95804	77748	161129	138306	92940	121258	153564	117688	104901	85980	112518	120499	139494	243268	176017	56564	90725	69104	146611	368150	66786	91749	295045	154539	48763	158487	164780	104299	69949	136999	58793	58807
7.38771	655	643	12	890	3-Methylbutanal	BCAA-derived	standard	C5H10O	590863		34669	33306	13945	697	616	40140	18654	19772	6567	31398	46728	15637	20206	39107	33683	20870	681	21056	23908	697	42418	18950	1338	624	10192	19258	46202	9577	14813	73172	19785	8132	26396	606	603	13552	22242	5563	6809
13.324	823	839	-16	849	3-Methylbutanoic acid	BCAA-derived	standard	C5H10O2	503742		78922	119118	33838	13383	17472	295217	24450	60043	115756	105951	116836	79425	93490	59655	71818	139953	57497	140436	79383	110297	141214	76430	15199	45557	62966	181858	139145	57092	93093	220672	141306	21631	100676	191777	218211	31387	160303	34583	27902
19.8742	991	992	-1	798	6-Methyl-5-hepten-2-ol	Carotenoid-derived	MS/RI	C8H16O	1569604		8377	17605	18577	38078	19056	6170	10619	14549	1874	9366	9074	10466	6748	14019	8855	14370	22229	21054	5476	21305	2112	3973	35671	21786	23192	18980	7366	12930	21123	8060	4821	25242	8012	8726	9848	15271	10381	6945	11986
19.6499	987	985	2	870	6-Methyl-5-hepten-2-one	Carotenoid-derived	standard	C8H14O	110930		632650	637138	863825	1021910	909894	630598	845875	858026	369782	494773	886000	637100	639446	727581	852969	987812	986383	761039	436352	640857	400645	264033	755763	867623	713413	481970	468067	703961	669998	867220	423106	958116	594705	508102	780641	774803	796692	499983	399267
23.0312	1073	1066	7	798	Acetophenone	Phenolic	standard	C8H8O	98862		49345	48168	65259	61888	55982	48102	57257	52914	46843	54931	60566	48087	51208	50838	47612	50047	49418	42795	53133	50766	51773	48895	64491	54162	47234	50757	52258	43403	57174	53443	52511	46631	50666	50053	42855	47596	58802	58301	53934
27.2976	1189	1182	7	830	p-methylacetophenone	Phenolic	standard	C9H10O	122009		73996	43547	60290	64145	66328	73790	53889	50649	52097	71498	81024	72073	85884	63122	77743	47249	43805	67732	43824	42952	39616	63915	71893	47987	39064	60104	58573	35592	55530	43400	62202	70401	75212	72995	36847	45736	62416	102438	80192
27.5041	1195	1189	6	861	alpha-Terpineol	Terpenoid	standard	C10H18O	98555		90297	74095	95529	52727	50484	70529	109990	101667	35004	114546	76669	96010	69347	89552	146612	110091	90411	52738	75244	85109	99766	67917	222217	69503	84645	87529	65495	69202	142584	49538	102009	99717	76366	86136	70286	90000	82666	114424	122530
19.0775	973	958	15	644	Benzaldehyde	Benzoates	standard	C7H6O	100527		15550	16431	12922	5179	4868	18590	10602	14115	17686	13158	9159	8386	16588	13916	10403	7554	6871	7187	17050	15994	18276	11357	9107	6890	11485	6783	13370	10220	10832	12440	14817	9567	20454	15835	10400	12407	10703	15916	19912
25.7102	1145	1172	-27	890	Benzoic acid	Benzoates	MS/RI	C7H6O2	65850		4923	14419	10275	8385	5368	6991	7893	9678	17933	10707	6412	5068	7701	10730	5676	10275	9293	24749	9534	9904	13527	12497	7545	7484	12896	14994	8008	8328	14957	9466	6395	5244	5982	7717	11051	10107	7924	7573	11747
31.8059	1324	1329	-5	910	Benzoic acid, isobutyl ester	Ester	MS/RI	C11H14O2	120503		17366	20504	20001	20161	15724	21182	40359	31845	11386	17184	22250	15377	19974	33930	17003	28607	21150	14616	28594	26394	29270	15889	20249	26897	21115	18299	17592	23662	20877	32957	19930	13943	17118	17640	22442	27545	17927	27827	18635
21.6504	1037	1035	2	882	Benzyl alcohol	Benzoates	standard	C7H8O	100516		51457	72455	35033	6840	8661	48250	41137	56355	154224	44382	18631	27607	77086	68227	25434	24411	17246	12818	72963	95192	110882	58233	85966	26729	57232	22033	60707	57434	43660	69516	88834	61361	113126	79056	48669	69632	50819	77399	133177
28.6017	1227	1219	8	716	beta-Cyclocitral	Carotenoid-derived	standard	C10H16O	432257		6246	6146	10980	5437	6588	5809	12225	6829	6200	7684	12299	4028	6263	8193	6155	7070	6745	5896	5155	6115	5457	4027	4297	6786	5921	3558	5358	9326	6276	8060	6385	5860	6399	6470	9042	6751	5072	8132	5248
33.6588	1388	1382	6	849	beta-Damascenone	Carotenoid-derived	MS/RI	C13H18O	23726934		16228	10300	8005	11656	20610	17861	23267	23696	13459	8717	15610	16125	20747	16953	22399	19417	12617	13307	13286	10083	20858	15601	9914	13696	13733	8679	9306	12149	14512	19690	11175	21159	15915	12132	8025	20858	10806	28622	14621
36.6152	1495	1486	9	910	beta-ionone	Carotenoid-derived	standard	C13H20O	14901076		16357	16186	22283	9317	12852	15988	34274	22688	20233	16632	41300	10795	17059	26343	15555	22367	16430	11671	15628	15254	14811	9432	7927	23588	14803	7079	12636	30584	11736	24330	13253	12011	24166	17853	31247	20098	13070	21456	10606
12.8696	813	810	3	906	Butyl acetate	Ester	MS/RI	C6H12O2	123864		120230	47577	68314	92811	101518	117256	79847	72173	73337	109646	111676	125216	146270	66335	110227	65341	50373	88617	65985	56124	67548	115656	106387	51674	45464	79059	82560	46500	72072	62893	99831	113347	116118	114625	46352	58148	75231	145236	120526
19.8919	992	982	10	900	Butyl butanoate	Ester	MS/RI	C8H16O2	109217		16515	9909	12590	18014	14958	17632	16357	14808	8649	13689	16256	16464	18325	15416	16295	14590	12769	14549	12922	13407	11593	12799	20462	14833	12146	15088	13115	10785	13719	13332	14322	17591	17308	14910	10956	14684	12178	22869	16970
16.5283	906	908	-2	893	Butyl propanoate	Ester	MS/RI	C7H14O2	590012		105304	42715	48204	74786	68968	90701	75181	62076	51318	73910	98101	97689	113142	55781	97905	48392	47929	71276	68415	43955	52803	86537	89755	36697	42968	76328	67095	39251	59541	68662	76948	90562	103224	84546	42044	56971	59289	133802	105497
32.7087	1356	1346	10	888	Eugenol	Phenylpropanoid	standard	C10H12O2	501199		628	13200	14773	4792	18954	11752	50951	26729	688	15055	50597	16625	24635	22161	19817	24471	13526	30992	17285	5845	39699	11321	41553	9007	33767	31930	6877	12400	27223	27444	15035	602	12994	5974	656	9307	2168	47634	71721
29.7583	1260	1270	-10	924	Geranial	Carotenoid-derived	standard	C10H16O	141275		173110	165321	231128	369480	302552	177240	238819	239012	89520	129186	274246	175918	193429	181766	249410	282429	261498	239765	104141	188816	90801	77416	246801	264855	210909	140567	122934	213759	201686	249774	123028	288752	162248	138226	204258	222012	241961	153767	140633
23.7865	1093	1088	5	813	Guaiacol	Phenylpropanoid	standard	C7H8O2	90051		2409	102505	180164	83920	167417	151919	134654	98943	1880	182045	100550	97906	77049	98455	119704	110306	238780	138898	181012	101009	133716	106474	90204	91710	179140	65805	113190	87196	86398	66762	83266	2668	136637	110331	1890	114335	69539	93843	93843
22.3231	1054	1068	-14	805	Heptanoic acid	Fatty acid	MS/RI	C7H14O2	111148		71935	69587	83254	112862	46746	102351	46731	71895	110186	57447	81921	79065	107360	111572	106161	107410	65929	150733	68016	48121	142329	118102	122799	32686	97824	181026	44248	99524	115845	76416	48129	94789	92911	35733	121071	83878	60684	71648	137761
12.3976	806	799	7	822	Hexanal	Lipid-derived	standard	C6H12O	66251		253750	131513	222401	216395	152774	142347	156757	205079	188719	170316	279209	189260	128978	183727	226125	199267	210782	208632	90396	212452	117236	122874	154208	265275	175003	113241	126377	328956	232266	155562	120422	364165	186314	161236	267241	219883	214199	164363	150892
23.5918	1088	1086	2	713	Linalool oxide A	Terpenoid	standard	C10H18O2	34995772		21601	10603	14771	9389	11890	25845	29595	30466	6312	15502	16821	14467	619	19225	26741	23679	16805	7108	16993	13778	20041	8487	23418	16977	10688	7727	9299	16696	13055	10574	13545	16905	660	16615	10986	18157	14245	36907	13542
23.1787	1077	1080	-3	869	Linalool oxide B	Terpenoid	standard	C10H18O2	5989333		27820	26179	16579	19777	29920	54065	73044	74918	14605	31764	29165	24207	32773	47601	26311	57804	37673	13881	41230	31239	49313	17277	35763	39853	25459	16849	21725	38031	13127	28755	32109	20713	25303	39086	25105	41550	18392	84858	21899
26.4478	1166	1167	-1	699	alpha-Phelladren-8-ol	Terpenoid	MS/RI	C10H16O	1686200		6588	16433	5400	7428	4559	11980	12035	9072	2087	5747	6367	5777	9486	28020	15554	10567	9939	18175	3419	1771	9845	12793	3105	6202	19696	11171	6472	5355	7986	3955	7883	8221	5807	7064	5282	9886	7383	17700	12797
27.7165	1201	1191	10	881	Methyl salicylate	Phenylpropanoid	standard	C8H8O3	119368		1462	35057	66630	63298	243484	214938	28325	96484	3334	25303	33074	42009	69514	45444	100613	27527	94825	174707	155784	146721	59778	344830	397976	110493	468824	228244	146263	160462	392190	68805	69612	3795	111222	218899	1306	190323	78786	124507	113373
10.9342	760			841	Methylthioacetaldehyde	Suphurous AA-derived	MS	C3H6OS	23328623		2376	6911	6651	633	647	2061	4477	1831	688	4826	5066	1174	1739	6912	5282	3337	3733	1451	4097	2115	819	642	868	672	712	684	1695	615	603	677	612	661	1450	639	739	657	2750	685	624
27.2445	1188			789	n-Decane	Lipid-derived	MS	C10H22	124185		16384	23520	13087	12521	14683	18562	22227	22999	8984	17509	17809	16049	12910	26026	13973	25095	17651	12611	18714	18597	24466	12182	13982	21900	20583	12310	13109	20968	12524	24659	12427	12468	15895	12288	19262	22395	14681	17785	15901
28.8673	1235	1202	33	787	Neral	Carotenoid-derived	standard	C10H16O	106263		30376	21693	32537	52054	51861	30944	50284	45383	14459	17629	55238	32876	42549	32390	48391	49314	38725	30451	18435	25527	15291	11485	40988	48587	28922	18672	18953	33766	26397	46170	20441	50908	30933	21671	28952	33585	34421	33504	20757
24.0285	1099	1101	-2	783	Nonanal	Lipid-derived	MS/RI	C9H18O	124196		9720	37280	12331	12596	57620	70799	64745	54595	6353	56517	15990	8536	11516	54416	13819	51813	44531	9130	54698	48809	60354	4911	658	50802	40674	56749	51948	41604	10181	55343	64381	15267	8422	65848	41616	42005	10103	97876	6942
29.0561	1240	1270	-30	898	Nonanoic acid	Fatty acid	MS/RI	C9H18O2	112050		525145	257222	361540	492984	353104	693591	468590	580889	555908	314969	852753	496163	795682	1053560	985657	870189	317102	1019000	552625	306988	908025	721961	922126	287706	476159	855416	268748	636751	240774	653159	418350	566536	649588	250842	841357	609349	314545	534571	938033
20.3049	1002	1000	2	847	Octanal	Lipid-derived	MS/RI	C8H16O	124130		26621	16805	21194	29592	28534	33944	26056	22880	17150	27073	34178	29291	36241	23831	30728	19213	18731	23260	23647	18402	21655	29808	32590	19454	15253	26647	27843	15229	19342	21231	33602	29291	31572	32602	16757	18082	22909	47044	37806
25.7869	1147	1179	-32	893	Octanoic acid	Fatty acid	MS/RI	C8H16O2	124072		254822	142336	155526	204553	117786	248069	191138	201455	283289	129477	199889	236909	332172	360204	335259	304701	135789	333073	179236	132187	367534	346715	308400	89136	215903	324834	103598	243473	145748	221072	145703	246347	276138	97906	275059	162844	147154	186443	368202
26.9848	1181	1195	-14	798	p-Cymen-8-ol	Terpenoid	MS/RI	C10H14O	1197019		23097	19122	19553	25858	19014	33059	21291	15220	10892	22936	23815	20374	25056	36880	34837	20854	23046	25682	693	669	17253	20344	18092	21854	23093	20057	18854	15339	14043	13965	20380	22841	21919	22292	21570	24086	31957	35277	25866
21.4439	1031	1026	5	852	p-Cymene	Terpenoid	MS/RI	C10H14	99876		14193	17755	11637	16131	10278	16286	21445	15130	5347	16943	13408	14768	16206	32197	19626	13850	15255	16139	15783	4186	12362	14158	14554	8982	14733	9431	8367	9075	11941	10903	10539	9330	15339	9913	10952	12297	12410	23210	12718
23.8278	1094	1091	3	795	p-Cymenene	Terpenoid	MS/RI	C10H12	1195320		7915	24737	9776	11669	19988	35125	63451	43321	11414	26981	7360	7660	6390	72093	7592	36561	26168	6524	30706	6773	28634	7824	10785	26509	22040	14107	14999	17428	9106	30813	18726	7318	8898	17129	15929	22210	9745	73965	7834
14.9173	872	878	-6	833	Pentanoic acid	Fatty acid	MS/RI	C5H10O2	109524		15667	29815	32599	14398	19387	15762	11614	11461	17788	28462	17023	18490	17088	8522	13463	13872	17117	20369	12139	27499	13805	17652	14326	12643	15013	24243	23540	12346	48641	11402	18142	15836	13522	18655	14505	9399	28433	16697	15600
22.1225	1050	1041	9	882	Phenylacetaldehyde	Phenolic	standard	C8H8O	122781		26415	36207	46682	18486	8236	17106	24363	13486	480503	50815	65908	18008	167107	35084	30582	22621	46182	30890	24798	19518	33828	21194	37353	34400	47840	36195	30908	28730	42491	85717	29240	291640	15346	43319	48912	56934	161225	22415	35114
28.3538	1220	1210	10	735	p-Menth-1-en-9-al	Terpenoid	MS/RI	C10H16O	29548149		18607	33712	44625	18683	16831	24644	20469	27735	18461	42141	11180	24860	13034	668	24452	32131	43165	30056	26117	44991	27892	29407	47757	17650	26280	26409	29937	25226	50382	12443	28255	18350	16787	37911	24761	26223	27914	15976	35040
16.5755	909	908	1	798	Methional	Suphurous AA-derived	MS/RI	C4H8OS	3268493		15655	13315	36164	663	640	5022	18003	5106	2113	35255	36413	6144	8844	20815	20905	5077	16783	6564	10386	5599	3933	8694	2391	1026	853	1474	13642	621	2110	3590	3226	4242	7525	3162	1457	1763	9004	1097	1144
22.2877	1053	1043	10	837	Salicylaldehyde	Phenylpropanoid	standard	C7H6O2	90028		1231	6159	6824	4893	5234	4051	7713	11023	2985	4873	3211	6429	8649	5867	10812	4886	6231	3804	7492	6795	9341	13290	9299	3165	14418	3847	11886	24522	12972	4360	9925	13137	7206	5560	1673	20329	9466	5659	9172
21.7625	1042	1035	7	910	2-isobutylthiazole	Suphurous AA and BCAA asid-derived	standard	C7H11NS	18640749		112005	259071	156162	100364	73106	98120	230218	262384	23319	279741	423911	212263	170283	257128	266796	408230	243702	246238	151189	213362	83895	81448	28928	92056	213518	158489	107321	196598	106595	353552	100553	225075	139086	141490	194587	312191	360030	98654	122117
33.0333	1366	1376	-10	783	trans-4,5-epoxy-2(E)-Decenal	Lipid-derived	MS/RI	C10H16O2	188590627		7920	20347	29180	17357	17176	4884	5199	9207	40132	15961	14485	10684	4801	5734	8692	12371	21713	30332	6637	22121	3413	8427	11149	21229	17039	12256	17550	24629	23003	7052	11039	21175	8127	16940	32295	10994	28463	2665	9325
[truncated: 57 more columns]
