# Supplementary material for: Breeding Has Increased the Diversity of Cultivated Tomato in The Netherlands
Source: Front Plant Sci. 2019 Dec 20;10:1606. doi: 10.3389/fpls.2019.01606 (PMC6932954; doi:10.3389/fpls.2019.01606)
Supplement: Data Sheet S7 — Flavor components of the investigated tomato varieties. Sugar: estimated as refraction (°Brix); % juice: the amount of juice, squeezed from the pericarp relatively to the weight of the pericarp before squeezing; Acidity: the amount of titratable acid (mmol H3O+/100gr); Firmness: the power needed to break the pericarp (N). For some varieties, there were not sufficient numbers of fruits available for reliable measurements. [file DataSheet_7.xlsx]

## Sheet: Verslag
	Flavor components of tomato varieties.
	Variety	number of fruits per sample	Sugar	Acidity	% juice	firmness
	6289 Rode	2	4.36667	7.621	67.305	55.1735
	Abunda	18	5.13333	8.126	42.3041	53.6397
	Allround	15	4.63333	7.77	50.0078	25.204
	Amfora	15	4.73333	7.695	50.5492	26.3787
	Amoroso (72-116 RZ)	20	6.63333	8.933	63.6668	100.063
	Angelle	30	8.06667	9.9922	54.6803	232.825
	Apollo	8	4.43333	7.703	50.8136	29.769
	Arawak	5	4.26667	5.65	38.6605	32.074
	Aromata	18	4.1	7.026	50.3577	31.0317
	Arvento (72-375 RZ)	18	4.36667	5.942	30.5816	42.666
	Bambelo,oranje	30	6.9	7.219	54.1832	223.438
	Belle	9	4.33333	7.295	22.2606	24.4427
	Bleke Raak	16	4.7	6.706	57.54	22.7533
	Bolzano	18	4.33333	5.604	40.1592	42.684
	Bornia	10	4.76667	7.443	62.7246	27.152
	Camona	16	4.46667	7.58	38.6181	31.4653
	Cherokee	18	7.66667	11.503	58.257	101.786
	Cherry Wonder	18	5.5	10.67	64.4044	100.383
	Climstar	14	3.6	5.229	27.4923	30.172
	Coronation	18	3.63333	6.314	37.2	33.821
	Dario	10	4.26667	7.185	45.6864	33.5793
	Darus	18	4.76667	7.833	41.0373	25.7533
	Diamantino	18	3.93333	6.356	22.6757	43.5647
	Diego	15	4.73333	7.803	44.003	43.9103
	Dombito	3	4.13333	7.994	46.8448	27.5873
	DR7024TS	10	3.9	6.463	41.1634	29.9943
	DRK 936	18	5.13333	5.993	57.6842	51.8957
	Elanto (72-372 RZ)	18	4.8	7.149	27.4316	53.9537
	Enchantment	18	4.76667	7.292	35.2664	32.2997
	Extase	18	4.46667	7.707	47.2094	26.32
	Favorita	18	7.13333	10	67.6013	108.321
	Flaneur	17	4.36667	7.642	64.3572	28.0067
	Isola	4	3.93333	5.841	22.8405	49.9527
	Jamaica	18	4.3	6.687	51.9812	35.9183
	Juanita	18	6.5	10.528	58.7415	281.402
	Komeett	0	*	*	*	*
	Lorenzo	18	3.93333	5.607	32.056	23.9097
	Majorca	16	5.1	7.697	38.4275	21.7127
	Matador	18	4.3	7.18	35.8215	67.3513
	Mecano VF	7	3.96667	6.18	39.786	24.9997
	Merlice	15	3.9	6.464	23.7784	42.7733
	Mini Star	30	7.3	10.531	43.5018	220.327
	Moneydor	10	4.83333	7.57	50.9904	42.041
	Moneymaker	18	4.73333	7.936	39.113	25.8463
	Moneymar	13	4.46667	6.799	47.8984	65.6853
	Multiset	16	4.73333	6.112	54.2908	21.4407
	No.59	10	3.9	6.611	54.1726	50.535
	Novita	10	4.43333	6.276	66.0967	21.9413
	Nunhem´s Tuckqueen	14	4.03333	7.67	37.1099	30.971
	Olmeca	14	5.06667	5.735	40.6027	37.5347
	Optima	8	4	6.387	56.0072	18.5783
	Osiris	8	4.3	7.626	57.923	42.2907
	Philovita	30	6.66667	10.34	56.3714	263.161
	Premier	13	4.03333	6.303	58.5742	30.9957
	Prolyco 2	18	5.86667	7.78	58.3184	100.759
	Pygmee	0	*	*	*	*
	Ramy	3	5.1	7.416	53.6078	25.9753
	Recento	12	4.33333	7.842	28.9158	40.125
	Renova	10	3.96667	6.726	43.3054	31.3157
	Robar	11	4.3	8.012	33.7178	37.9373
	Robin svfs	10	4.33333	6.973	53.892	20.4017
	Roda	7	4.33333	6.799	48.5394	26.7613
	Roda Compacta	8	4.83333	8.097	58.192	57.2373
	Romanella	18	4.33333	5.401	31.1875	18.9207
	Roterno (72-230 RZ)	18	5.03333	6.851	40.4084	104.859
	Rovic	16	4.33333	6.812	43.935	45.5293
	Santorange	18	7.03333	9.448	41.2733	228.043
	Sassari (72-138 RZ)	30	6.53333	10.135	56.5225	109.012
	Shirley	18	4.3	8.035	50.2943	34.0093
	Sierra	14	4.43333	6.636	46.6916	21.717
	Sirocco	18	4.66667	6.887	40.5705	30.268
	Sonatine	18	4.3	7.879	56.7752	34.0107
	Sonato	15	4.3	0	62.4277	24.2713
	Splendid	24	4.56667	7.549	53.2681	20.6177
	Starbuck	14	3.93333	5.344	24.1446	15.7537
	Starfighter	18	4.33333	6.734	33.431	35.7727
	Start	16	3.7	5.423	41.0461	22.9563
	Sunstream	30	6.63333	8.937	37.96	170.672
	Superieur	16	4.3	7.209	41.4286	42.515
	SV0948TS	30	6.93333	9.228	68.2365	228.369
	Sweetelle	30	7.63333	10.175	50.9953	226.134
	Titan	18	4.7	7.105	54.1694	24.917
	Tomimaru Muchoo	16	4.73333	5.351	52.9549	32.6437
	Tomosa	16	4.66667	7.035	40.0531	22.629
	Tourance	18	4.36667	4.994	27.1636	37.356
	Trajan	0	*	*	*	*
	V 121	1	4.36667	8.125	48.5742	33.8527
	Vacetto (72-164 RZ) large fruits	17	3.96667	6.124	22.3033	42.0963
	Vacetto (72-164 RZ) small fruits	23	6.56667	8.862	49.1895	187.822
	Ventura FR	1	3.76667	6.45	52.7305	39.328
	Wasino (72-155 RZ)	18	5.6	6.609	57.1703	102.557
